# Supplementary material for: Transcriptome Profiling of HCT-116 Colorectal Cancer Cells with RNA Sequencing Reveals Novel Targets for Polyphenol Nano Curcumin
Source: MDPI journal article supplement (doi:10.3390/molecules27113470), 2022-05-27
Supplement: s1 [file s1]

| ENSEMBL Access  | baseMean    | log2FoldChange | lfcSE       | stat         | pvalue   |
|-----------------|-------------|----------------|-------------|--------------|----------|
| ENSG00000100292 | 14082.62694 | 4.581562629    | 0.393634484 | 11.63912923  | 2.61E-31 |
| ENSG00000175197 | 7029.256613 | 4.083832348    | 0.394678686 | 10.34723307  | 4.31E-25 |
| ENSG00000162772 | 5160.583093 | 2.807268493    | 0.279169857 | 10.05577222  | 8.66E-24 |
| ENSG00000128965 | 2994.215108 | 3.896156731    | 0.400671766 | 9.724061083  | 2.38E-22 |
| ENSG00000051108 | 12540.2839  | 2.267609018    | 0.254121675 | 8.923319972  | 4.53E-19 |
| ENSG00000134548 | 260.3100572 | 4.781735304    | 0.578881871 | 8.260295488  | 1.45E-16 |
| ENSG00000128590 | 2736.218941 | 2.665123436    | 0.342986352 | 7.770348352  | 7.83E-15 |
| ENSG00000140961 | 13215.94753 | 4.534403283    | 0.586017479 | 7.737658766  | 1.01E-14 |
| ENSG00000248323 | 608.1074734 | 3.025170425    | 0.396356099 | 7.632455838  | 2.30E-14 |
| ENSG00000160949 | 2059.715955 | -2.895968786   | 0.395525451 | -7.321826647 | 2.45E-13 |
| ENSG00000186529 | 547.2113245 | 2.671815929    | 0.369557519 | 7.229770172  | 4.84E-13 |
| ENSG00000125775 | 368.0621282 | 3.854215981    | 0.535212402 | 7.201283023  | 5.96E-13 |
| ENSG00000130766 | 6910.754023 | 3.544609276    | 0.494533657 | 7.167579451  | 7.63E-13 |
| ENSG00000250033 | 277.5812267 | 3.188924548    | 0.450900556 | 7.072345564  | 1.52E-12 |
| ENSG00000140941 | 20010.47035 | 2.997711012    | 0.426804353 | 7.023618645  | 2.16E-12 |
| ENSG00000141582 | 5588.017669 | 1.893434606    | 0.269914217 | 7.014949523  | 2.30E-12 |
| ENSG00000171658 | 109.3127367 | 3.696930044    | 0.531123305 | 6.960587137  | 3.39E-12 |
| ENSG00000167995 | 120.1244222 | 3.395188634    | 0.495143157 | 6.856983861  | 7.03E-12 |
| ENSG00000104738 | 5519.294187 | -2.81519816    | 0.421580667 | -6.677721205 | 2.43E-11 |
| ENSG00000256663 | 221.6533313 | -3.063761725   | 0.459516819 | -6.667354921 | 2.60E-11 |
| ENSG00000178381 | 5371.921397 | 4.79341078     | 0.722529271 | 6.634209811  | 3.26E-11 |
| ENSG00000158079 | 1461.089869 | 1.792619227    | 0.270471248 | 6.627762623  | 3.41E-11 |
| ENSG00000187741 | 1932.180365 | -2.674767211   | 0.406894311 | -6.573616627 | 4.91E-11 |
| ENSG00000120889 | 20952.87042 | 2.09069627     | 0.318216488 | 6.570043809  | 5.03E-11 |
| ENSG00000120738 | 32667.04831 | 2.654225119    | 0.4053165   | 6.548524716  | 5.81E-11 |
| ENSG00000197299 | 995.8815356 | -2.698813809   | 0.413601216 | -6.525159274 | 6.79E-11 |
| ENSG00000007968 | 629.9051976 | -2.623783095   | 0.40238286  | -6.520613465 | 7.00E-11 |
| ENSG00000113905 | 76.72572618 | 4.014459148    | 0.616768465 | 6.508859277  | 7.57E-11 |
| ENSG00000121152 | 1459.513997 | -3.162915213   | 0.490122466 | -6.453316129 | 1.09E-10 |
| ENSG00000208028 | 95.04051392 | 2.969919327    | 0.460380893 | 6.451004748  | 1.11E-10 |
| ENSG00000186185 | 1583.582198 | -3.077565981   | 0.477409254 | -6.446389461 | 1.15E-10 |
| ENSG00000034063 | 2198.427871 | -2.78381507    | 0.432415614 | -6.437822736 | 1.21E-10 |
| ENSG00000271303 | 1495.637262 | 3.36753052     | 0.523180382 | 6.4366529    | 1.22E-10 |
| ENSG00000111665 | 933.7761936 | -3.486164471   | 0.542823181 | -6.422283704 | 1.34E-10 |
| ENSG00000087074 | 16161.06681 | 3.528430665    | 0.552995592 | 6.38057647   | 1.76E-10 |
| ENSG00000075218 | 1050.132979 | -3.031955592   | 0.475694621 | -6.373743701 | 1.84E-10 |
| ENSG00000122224 | 56.56979432 | 6.49783452     | 1.021624724 | 6.3602949    | 2.01E-10 |
| ENSG00000117724 | 5816.325565 | -2.57046537    | 0.404495893 | -6.354737869 | 2.09E-10 |
| ENSG00000133639 | 4392.850736 | 1.887927906    | 0.297113941 | 6.35422189   | 2.09E-10 |
| ENSG00000152253 | 583.2480864 | -3.433321527   | 0.541140507 | -6.344602704 | 2.23E-10 |
| ENSG00000161888 | 574.8987481 | -3.604977246   | 0.568358331 | -6.342789482 | 2.26E-10 |
| ENSG00000161011 | 36805.84458 | 2.700353252    | 0.42576085  | 6.342417932  | 2.26E-10 |
| ENSG00000059728 | 2038.134042 | 2.83595079     | 0.45241758  | 6.268436326  | 3.65E-10 |
| ENSG00000073111 | 3444.567429 | -2.429574191   | 0.38917836  | -6.242829611 | 4.30E-10 |
| ENSG00000006652 | 4344.375693 | 1.882100399    | 0.303619662 | 6.198875214  | 5.69E-10 |
| ENSG00000166401 | 1383.403902 | 2.794044526    | 0.451019178 | 6.194957255  | 5.83E-10 |

|                 |             |              |             |              |          |
|-----------------|-------------|--------------|-------------|--------------|----------|
| ENSG00000151012 | 16316.80316 | 2.708772754  | 0.437856638 | 6.18643757   | 6.15E-10 |
| ENSG00000234719 | 148.4642286 | 3.396779818  | 0.550880767 | 6.166088966  | 7.00E-10 |
| ENSG00000122966 | 1652.700487 | -2.721355246 | 0.443458809 | -6.136658439 | 8.43E-10 |
| ENSG00000076003 | 3358.48161  | -2.064684115 | 0.336835662 | -6.129648211 | 8.81E-10 |
| ENSG00000228716 | 1655.517312 | -1.875551738 | 0.307456544 | -6.100217336 | 1.06E-09 |
| ENSG00000170312 | 3674.238639 | -3.158050669 | 0.523328225 | -6.034550625 | 1.59E-09 |
| ENSG00000148773 | 11781.90533 | -2.52630164  | 0.418728778 | -6.033264899 | 1.61E-09 |
| ENSG00000255414 | 101.5702569 | 2.393797768  | 0.397708525 | 6.01897525   | 1.76E-09 |
| ENSG00000131747 | 4670.768224 | -2.718685071 | 0.451766339 | -6.017900924 | 1.77E-09 |
| ENSG00000129173 | 478.7296937 | -2.977540435 | 0.494868095 | -6.016836536 | 1.78E-09 |
| ENSG00000117632 | 7721.205273 | -2.097790458 | 0.348936176 | -6.01196036  | 1.83E-09 |
| ENSG00000165244 | 758.795139  | -2.575174294 | 0.429399944 | -5.997146317 | 2.01E-09 |
| ENSG00000168496 | 2374.048633 | -2.376954513 | 0.396854262 | -5.989489703 | 2.11E-09 |
| ENSG00000166508 | 7725.92833  | -2.535236901 | 0.424343873 | -5.974486872 | 2.31E-09 |
| ENSG00000130222 | 199.1380346 | 4.639295764  | 0.778303467 | 5.960780028  | 2.51E-09 |
| ENSG00000169435 | 300.2870992 | 1.885361164  | 0.317162725 | 5.944460107  | 2.77E-09 |
| ENSG00000171320 | 830.0054182 | -2.609868753 | 0.43906712  | -5.94412251  | 2.78E-09 |
| ENSG00000163898 | 2159.598059 | 2.695270736  | 0.455596444 | 5.915916975  | 3.30E-09 |
| ENSG00000176890 | 2110.839807 | -2.881027045 | 0.487642356 | -5.908073841 | 3.46E-09 |
| ENSG00000128165 | 1212.302844 | 2.118218472  | 0.35856912  | 5.907420219  | 3.48E-09 |
| ENSG00000198576 | 2445.426152 | 2.222478129  | 0.376994704 | 5.895250259  | 3.74E-09 |
| ENSG00000159556 | 350.9418666 | 1.693903233  | 0.288026697 | 5.881063295  | 4.08E-09 |
| ENSG00000136982 | 1215.730033 | -2.476521913 | 0.421393903 | -5.876976141 | 4.18E-09 |
| ENSG00000204389 | 876.055314  | 4.338295144  | 0.738432604 | 5.875004869  | 4.23E-09 |
| ENSG00000126787 | 2214.174012 | -2.963498893 | 0.504727616 | -5.871481571 | 4.32E-09 |
| ENSG00000065328 | 1151.177079 | -2.543319634 | 0.433416476 | -5.868073263 | 4.41E-09 |
| ENSG00000004777 | 482.4956657 | -3.156398735 | 0.538285244 | -5.863803196 | 4.52E-09 |
| ENSG00000101412 | 856.5758189 | -2.339765421 | 0.400353977 | -5.844241729 | 5.09E-09 |
| ENSG00000100479 | 511.8331784 | -2.808407526 | 0.481510367 | -5.83249649  | 5.46E-09 |
| ENSG00000156970 | 2591.459598 | -2.989861925 | 0.513691919 | -5.820340584 | 5.87E-09 |
| ENSG00000099860 | 3153.377445 | 2.274074168  | 0.390826106 | 5.818634259  | 5.93E-09 |
| ENSG00000131711 | 4646.105963 | 1.99930175   | 0.343720334 | 5.816652536  | 6.00E-09 |
| ENSG00000115687 | 1034.423716 | -2.235029932 | 0.384283236 | -5.81610053  | 6.02E-09 |
| ENSG00000101255 | 12977.05425 | 2.981200572  | 0.513322083 | 5.807660868  | 6.34E-09 |
| ENSG00000178999 | 1556.032081 | -3.191956736 | 0.550312905 | -5.800257824 | 6.62E-09 |
| ENSG00000135476 | 1695.194249 | -2.627809857 | 0.454101629 | -5.786832038 | 7.17E-09 |
| ENSG00000204388 | 41288.99535 | 4.111985602  | 0.712642591 | 5.770053111  | 7.92E-09 |
| ENSG00000116717 | 6812.727647 | 2.184235287  | 0.37890949  | 5.764530437  | 8.19E-09 |
| ENSG00000089685 | 1551.621555 | -2.47217417  | 0.429325119 | -5.758279826 | 8.50E-09 |
| ENSG00000127564 | 1122.488667 | -2.948731448 | 0.512884343 | -5.749310709 | 8.96E-09 |
| ENSG00000267056 | 1675.527347 | 2.97867973   | 0.518745437 | 5.742083725  | 9.35E-09 |
| ENSG00000197019 | 3370.042898 | 2.377326059  | 0.41474908  | 5.731962222  | 9.93E-09 |
| ENSG00000165480 | 1058.804428 | -2.797678744 | 0.488648297 | -5.725342256 | 1.03E-08 |
| ENSG00000255150 | 413.4767944 | 4.212587158  | 0.741345279 | 5.682355142  | 1.33E-08 |
| ENSG00000144655 | 2734.31781  | 2.44639291   | 0.432012058 | 5.66278849   | 1.49E-08 |
| ENSG00000168078 | 2597.463003 | -2.772961384 | 0.490533115 | -5.652954505 | 1.58E-08 |
| ENSG00000136155 | 50.95206844 | 8.181190669  | 1.448327798 | 5.648714799  | 1.62E-08 |

|                 |             |              |             |              |          |
|-----------------|-------------|--------------|-------------|--------------|----------|
| ENSG00000113070 | 2697.032896 | 2.743514539  | 0.48590685  | 5.646173826  | 1.64E-08 |
| ENSG00000171848 | 8292.143365 | -2.788561779 | 0.49416172  | -5.643014555 | 1.67E-08 |
| ENSG00000196182 | 4019.311832 | 2.32933432   | 0.413152772 | 5.637949146  | 1.72E-08 |
| ENSG00000186871 | 646.8201045 | -2.722485027 | 0.484972442 | -5.613690158 | 1.98E-08 |
| ENSG00000119969 | 1877.969913 | -2.067036266 | 0.369021954 | -5.601391036 | 2.13E-08 |
| ENSG00000198074 | 283.2857448 | 3.844171284  | 0.687881638 | 5.588419678  | 2.29E-08 |
| ENSG00000079616 | 2821.308854 | -2.496789794 | 0.4473297   | -5.581542644 | 2.38E-08 |
| ENSG00000102384 | 432.6772902 | -2.9276817   | 0.524837694 | -5.578261115 | 2.43E-08 |
| ENSG00000101782 | 6249.130454 | 2.304326592  | 0.415380992 | 5.547501302  | 2.90E-08 |
| ENSG00000137310 | 583.6481559 | -2.448207021 | 0.441430204 | -5.546079532 | 2.92E-08 |
| ENSG00000144354 | 1419.149094 | -2.892321214 | 0.521650713 | -5.544555273 | 2.95E-08 |
| ENSG00000109084 | 1266.085596 | -1.850259283 | 0.334067651 | -5.538576623 | 3.05E-08 |
| ENSG00000113368 | 3563.925829 | -2.941806618 | 0.532072223 | -5.528961094 | 3.22E-08 |
| ENSG00000151503 | 2864.973361 | -2.117168417 | 0.383535637 | -5.520134801 | 3.39E-08 |
| ENSG00000023909 | 6386.108227 | 2.101722604  | 0.380837702 | 5.518683133  | 3.42E-08 |
| ENSG00000108448 | 1240.796602 | 1.539868181  | 0.279383096 | 5.511672692  | 3.55E-08 |
| ENSG00000090020 | 3877.245852 | 2.230829388  | 0.40495149  | 5.508880557  | 3.61E-08 |
| ENSG00000198554 | 1376.001458 | -2.51996643  | 0.457781232 | -5.504739497 | 3.70E-08 |
| ENSG00000071539 | 1264.032445 | -2.443573119 | 0.443974309 | -5.503861523 | 3.72E-08 |
| ENSG00000107984 | 10977.71447 | -3.090596433 | 0.561661772 | -5.502593534 | 3.74E-08 |
| ENSG00000159885 | 324.8885459 | 3.080612363  | 0.559934835 | 5.50173372   | 3.76E-08 |
| ENSG00000092853 | 865.6041028 | -2.371453184 | 0.431936818 | -5.490277939 | 4.01E-08 |
| ENSG00000228727 | 53.03226258 | -4.702900958 | 0.857416548 | -5.4849664   | 4.14E-08 |
| ENSG00000129195 | 820.0110071 | -2.799211943 | 0.510392751 | -5.484427311 | 4.15E-08 |
| ENSG00000138376 | 617.9682373 | -1.975227316 | 0.360187386 | -5.483888092 | 4.16E-08 |
| ENSG00000171303 | 211.1711997 | 4.268692587  | 0.780957401 | 5.465973664  | 4.60E-08 |
| ENSG00000177606 | 4766.09439  | 1.636050301  | 0.299715736 | 5.458673346  | 4.80E-08 |
| ENSG00000120217 | 870.5490995 | 2.579715753  | 0.472609762 | 5.458447876  | 4.80E-08 |
| ENSG00000112118 | 5471.895925 | -1.949081225 | 0.357363705 | -5.45405478  | 4.92E-08 |
| ENSG00000066279 | 2211.688205 | -2.33067172  | 0.428034155 | -5.44506015  | 5.18E-08 |
| ENSG00000261592 | 63.30003068 | 4.255523309  | 0.782723196 | 5.436817677  | 5.42E-08 |
| ENSG00000261270 | 150.8481608 | 2.332285679  | 0.429976598 | 5.424215383  | 5.82E-08 |
| ENSG00000010379 | 103.4144207 | 4.755497686  | 0.876834422 | 5.423484262  | 5.84E-08 |
| ENSG00000164109 | 2923.876803 | -2.545217325 | 0.469989702 | -5.415474666 | 6.11E-08 |
| ENSG00000112984 | 2023.481122 | -3.014324773 | 0.55664121  | -5.415202322 | 6.12E-08 |
| ENSG00000237649 | 2232.231546 | -2.615976433 | 0.484186461 | -5.402828547 | 6.56E-08 |
| ENSG00000162063 | 1536.049709 | -2.608998353 | 0.484110347 | -5.389263766 | 7.07E-08 |
| ENSG00000100439 | 2269.900909 | 2.825269804  | 0.524755717 | 5.383971463  | 7.29E-08 |
| ENSG00000198496 | 361.6170082 | 1.972785931  | 0.366451553 | 5.383483611  | 7.31E-08 |
| ENSG00000168393 | 968.0867401 | -2.037370999 | 0.378839363 | -5.377928475 | 7.53E-08 |
| ENSG00000160298 | 230.2083952 | -2.415668186 | 0.449858071 | -5.369845161 | 7.88E-08 |
| ENSG00000109674 | 462.5752636 | -3.297463499 | 0.615709071 | -5.35555452  | 8.53E-08 |
| ENSG00000156510 | 455.0836518 | 2.617599897  | 0.490574619 | 5.335783372  | 9.51E-08 |
| ENSG00000113369 | 3572.118208 | 1.539515895  | 0.289033396 | 5.326429112  | 1.00E-07 |
| ENSG00000166851 | 3006.888787 | -2.898262895 | 0.545220298 | -5.315764851 | 1.06E-07 |
| ENSG00000214826 | 444.8382598 | -2.272984024 | 0.428385223 | -5.305934714 | 1.12E-07 |
| ENSG00000164309 | 854.4787236 | 4.074371321  | 0.768107058 | 5.304431563  | 1.13E-07 |

|                 |             |              |             |              |          |
|-----------------|-------------|--------------|-------------|--------------|----------|
| ENSG00000145386 | 2508.287382 | -3.056475969 | 0.576266639 | -5.303926624 | 1.13E-07 |
| ENSG00000251192 | 570.1613383 | 2.005952575  | 0.378601174 | 5.298326342  | 1.17E-07 |
| ENSG00000145536 | 150.855857  | 2.362960649  | 0.446275339 | 5.29484926   | 1.19E-07 |
| ENSG00000123485 | 1736.204189 | -2.754235977 | 0.5209209   | -5.28724414  | 1.24E-07 |
| ENSG00000100749 | 1237.412438 | -2.3098523   | 0.438113998 | -5.272263176 | 1.35E-07 |
| ENSG00000169679 | 3632.926378 | -2.678263324 | 0.508052079 | -5.271631463 | 1.35E-07 |
| ENSG00000170222 | 495.9720182 | 1.534154446  | 0.291244853 | 5.267576158  | 1.38E-07 |
| ENSG00000137807 | 2423.40703  | -2.288598663 | 0.435426121 | -5.255997637 | 1.47E-07 |
| ENSG00000178607 | 2425.270283 | 1.476688351  | 0.281466908 | 5.246401298  | 1.55E-07 |
| ENSG00000122952 | 1708.212817 | -2.286801648 | 0.435905093 | -5.246099857 | 1.55E-07 |
| ENSG00000076248 | 2379.303198 | -1.575850974 | 0.300494248 | -5.2441968   | 1.57E-07 |
| ENSG00000100297 | 2792.231431 | -2.364194942 | 0.45099391  | -5.242188176 | 1.59E-07 |
| ENSG00000013573 | 1728.630171 | -2.157394424 | 0.411621421 | -5.241210286 | 1.60E-07 |
| ENSG00000175063 | 2965.187271 | -3.007835223 | 0.573888789 | -5.241146511 | 1.60E-07 |
| ENSG00000100726 | 1055.069635 | -1.966390133 | 0.375565362 | -5.235813346 | 1.64E-07 |
| ENSG00000130816 | 6077.146303 | -1.733255596 | 0.33150429  | -5.228456008 | 1.71E-07 |
| ENSG00000167900 | 3977.715024 | -2.076359423 | 0.398220535 | -5.214094305 | 1.85E-07 |
| ENSG00000142945 | 2410.253914 | -2.746678226 | 0.527069937 | -5.211221576 | 1.88E-07 |
| ENSG00000172602 | 324.3678263 | 2.967797854  | 0.570414617 | 5.202878338  | 1.96E-07 |
| ENSG00000150961 | 3145.280334 | 1.329360403  | 0.255741344 | 5.198066066  | 2.01E-07 |
| ENSG00000087086 | 184906.0298 | 2.499342012  | 0.482518736 | 5.179782304  | 2.22E-07 |
| ENSG00000137135 | 494.9681011 | -2.77932445  | 0.537198184 | -5.173741338 | 2.29E-07 |
| ENSG00000220773 | 34.19292955 | 3.335232231  | 0.644917389 | 5.171565051  | 2.32E-07 |
| ENSG00000196230 | 19732.65972 | -2.149715056 | 0.41616493  | -5.165536311 | 2.40E-07 |
| ENSG00000111206 | 1639.428196 | -2.076599739 | 0.402279985 | -5.162075705 | 2.44E-07 |
| ENSG00000115008 | 99.66818377 | 3.300614221  | 0.640671295 | 5.151806003  | 2.58E-07 |
| ENSG00000239705 | 25.96226463 | 7.202345491  | 1.398116442 | 5.151463266  | 2.58E-07 |
| ENSG00000023171 | 1589.517222 | 1.92372419   | 0.373570709 | 5.149558421  | 2.61E-07 |
| ENSG00000119333 | 2210.154554 | -2.162067026 | 0.421176037 | -5.133404644 | 2.85E-07 |
| ENSG00000186594 | 6051.915669 | 6.122028265  | 1.196033413 | 5.118609729  | 3.08E-07 |
| ENSG00000086544 | 1977.905688 | 2.597756052  | 0.50793052  | 5.114392523  | 3.15E-07 |
| ENSG00000127586 | 1548.235789 | -2.216309845 | 0.435227384 | -5.092303307 | 3.54E-07 |
| ENSG00000101868 | 1212.202103 | -1.903363964 | 0.374257736 | -5.085703732 | 3.66E-07 |
| ENSG00000173706 | 517.3480249 | -1.437553325 | 0.283032316 | -5.079113741 | 3.79E-07 |
| ENSG00000230799 | 44.00630987 | 5.482805376  | 1.08125686  | 5.070770486  | 3.96E-07 |
| ENSG00000170801 | 31.80813158 | 4.8171811    | 0.950439917 | 5.068369935  | 4.01E-07 |
| ENSG00000139988 | 47.12765872 | 2.872256387  | 0.567337363 | 5.062695631  | 4.13E-07 |
| ENSG00000132002 | 37229.66328 | 2.64064691   | 0.521638863 | 5.062212759  | 4.14E-07 |
| ENSG00000116830 | 1442.06513  | -2.205888636 | 0.43578749  | -5.061844787 | 4.15E-07 |
| ENSG00000151725 | 539.2778577 | -1.777781812 | 0.351285068 | -5.060795269 | 4.18E-07 |
| ENSG00000185022 | 3901.976913 | 2.421524357  | 0.478558208 | 5.060041425  | 4.19E-07 |
| ENSG00000160957 | 2662.387677 | -1.842434394 | 0.364275279 | -5.057807925 | 4.24E-07 |
| ENSG00000062822 | 1359.339795 | -2.090095169 | 0.413451663 | -5.055234645 | 4.30E-07 |
| ENSG00000198056 | 817.9450081 | -1.956029809 | 0.387078476 | -5.053315886 | 4.34E-07 |
| ENSG00000155304 | 4547.25581  | 1.769707127  | 0.350546788 | 5.048419176  | 4.45E-07 |
| ENSG00000112742 | 1735.878779 | -2.449107841 | 0.485249049 | -5.047115178 | 4.49E-07 |
| ENSG00000035499 | 830.4904359 | -2.267223129 | 0.449289955 | -5.046235958 | 4.51E-07 |

|                 |             |              |             |              |          |
|-----------------|-------------|--------------|-------------|--------------|----------|
| ENSG00000134057 | 5209.327474 | -2.515652928 | 0.499158314 | -5.0397897   | 4.66E-07 |
| ENSG00000152433 | 209.791379  | 2.799451894  | 0.555927726 | 5.035639998  | 4.76E-07 |
| ENSG00000044574 | 161237.651  | 1.976165845  | 0.392859715 | 5.030207399  | 4.90E-07 |
| ENSG00000091129 | 56.88380735 | 5.402875268  | 1.074404092 | 5.028718068  | 4.94E-07 |
| ENSG00000137745 | 39.49392446 | 4.793851109  | 0.954362818 | 5.023090819  | 5.08E-07 |
| ENSG00000105486 | 1504.960127 | -2.540480033 | 0.506439721 | -5.016352253 | 5.27E-07 |
| ENSG00000177854 | 125.9107143 | -2.564613737 | 0.511269485 | -5.016168209 | 5.27E-07 |
| ENSG00000158615 | 12131.37785 | 1.495019701  | 0.29804998  | 5.016003361  | 5.28E-07 |
| ENSG00000212724 | 140.4999166 | -4.335098219 | 0.864644086 | -5.013737202 | 5.34E-07 |
| ENSG00000143228 | 1137.329947 | -2.341574853 | 0.467565964 | -5.008009633 | 5.50E-07 |
| ENSG00000114346 | 4019.153243 | -2.105524154 | 0.420536238 | -5.006760328 | 5.54E-07 |
| ENSG00000100867 | 1572.553578 | -2.987750263 | 0.597898053 | -4.997089799 | 5.82E-07 |
| ENSG00000162062 | 426.2009292 | -2.371958539 | 0.475665223 | -4.986613325 | 6.14E-07 |
| ENSG00000070669 | 22644.59486 | 2.348254588  | 0.47123766  | 4.983164094  | 6.26E-07 |
| ENSG00000172403 | 186.1427576 | 2.63450374   | 0.528751037 | 4.982503214  | 6.28E-07 |
| ENSG00000162733 | 335.5985329 | 2.625470787  | 0.52741503  | 4.97799766   | 6.42E-07 |
| ENSG00000080986 | 982.2796752 | -2.484884181 | 0.500082117 | -4.96895229  | 6.73E-07 |
| ENSG00000149929 | 549.5354005 | -2.295243769 | 0.462108818 | -4.966890221 | 6.80E-07 |
| ENSG00000267149 | 57.71937277 | 4.003552497  | 0.807203826 | 4.959778893  | 7.06E-07 |
| ENSG00000150991 | 90565.15787 | 2.46678605   | 0.49772349  | 4.956137494  | 7.19E-07 |
| ENSG00000174371 | 929.3481514 | -2.330486673 | 0.470922803 | -4.94876582  | 7.47E-07 |
| ENSG00000167996 | 36425.40361 | 1.391876056  | 0.282093325 | 4.934097813  | 8.05E-07 |
| ENSG00000118513 | 139.8383063 | -3.096260076 | 0.628473893 | -4.926632768 | 8.37E-07 |
| ENSG00000143067 | 1657.312096 | 2.231123279  | 0.452998664 | 4.92523148   | 8.43E-07 |
| ENSG00000013810 | 2749.254024 | -2.174910835 | 0.441650071 | -4.924511457 | 8.46E-07 |
| ENSG00000107864 | 373.4215133 | 1.850624664  | 0.375812937 | 4.924323994  | 8.47E-07 |
| ENSG00000197301 | 112.9212352 | -2.970139882 | 0.603572811 | -4.920930548 | 8.61E-07 |
| ENSG00000121621 | 1078.68468  | -1.774037124 | 0.36054435  | -4.920440779 | 8.63E-07 |
| ENSG00000102265 | 9106.87257  | 1.526223528  | 0.310319488 | 4.918232941  | 8.73E-07 |
| ENSG00000143367 | 1540.927409 | 1.752481909  | 0.356518977 | 4.91553612   | 8.85E-07 |
| ENSG00000158402 | 526.6938771 | -2.465426691 | 0.501562835 | -4.915489187 | 8.86E-07 |
| ENSG00000166278 | 33.47459829 | 2.857970446  | 0.581776884 | 4.912485398  | 8.99E-07 |
| ENSG00000115902 | 744.3396127 | 1.630126803  | 0.331956332 | 4.910666397  | 9.08E-07 |
| ENSG00000146918 | 2575.393843 | -2.030620386 | 0.413791541 | -4.90735113  | 9.23E-07 |
| ENSG00000176018 | 2926.730433 | 1.284304238  | 0.261886018 | 4.904058071  | 9.39E-07 |
| ENSG00000152137 | 1921.641609 | 2.963603877  | 0.605425864 | 4.895073127  | 9.83E-07 |
| ENSG00000101057 | 2277.540997 | -2.291670286 | 0.46893873  | -4.886929014 | 1.02E-06 |
| ENSG00000011426 | 5557.786798 | -2.44937259  | 0.502084179 | -4.878410221 | 1.07E-06 |
| ENSG00000100162 | 221.8934773 | -2.772516074 | 0.568874083 | -4.87369025  | 1.10E-06 |
| ENSG00000038427 | 3773.167937 | -2.671106483 | 0.548771244 | -4.867431575 | 1.13E-06 |
| ENSG00000171223 | 7823.173544 | 1.253887497  | 0.257915176 | 4.861627442  | 1.16E-06 |
| ENSG00000153714 | 401.8332583 | 2.165478578  | 0.445540781 | 4.860337525  | 1.17E-06 |
| ENSG00000173212 | 53.10392293 | 4.846042063  | 0.99814611  | 4.85504278   | 1.20E-06 |
| ENSG00000111602 | 2484.016683 | -2.071616079 | 0.42757919  | -4.844988083 | 1.27E-06 |
| ENSG00000139112 | 6603.483738 | 2.409026217  | 0.497253232 | 4.84466678   | 1.27E-06 |
| ENSG00000165813 | 4130.191587 | 1.932599298  | 0.399021315 | 4.843348521  | 1.28E-06 |
| ENSG00000119801 | 3407.800151 | 2.027801361  | 0.419284935 | 4.836332505  | 1.32E-06 |

|                 |             |              |             |              |          |
|-----------------|-------------|--------------|-------------|--------------|----------|
| ENSG00000229808 | 38.74275678 | 4.334700385  | 0.897325629 | 4.830688264  | 1.36E-06 |
| ENSG00000163808 | 635.7212543 | -2.251489365 | 0.46653711  | -4.82595986  | 1.39E-06 |
| ENSG00000148841 | 2230.995879 | 1.647243754  | 0.341465446 | 4.824042301  | 1.41E-06 |
| ENSG00000131153 | 1056.269512 | -2.456290686 | 0.509316988 | -4.822715021 | 1.42E-06 |
| ENSG00000140451 | 447.6175778 | -3.483100715 | 0.722477561 | -4.821050376 | 1.43E-06 |
| ENSG00000183856 | 1421.826762 | -2.440820073 | 0.506597268 | -4.818067976 | 1.45E-06 |
| ENSG00000166750 | 4139.315651 | 1.578037182  | 0.327590637 | 4.817100986  | 1.46E-06 |
| ENSG00000166803 | 651.4765172 | -2.054794846 | 0.426947946 | -4.812752615 | 1.49E-06 |
| ENSG00000161996 | 620.7306776 | -2.36850122  | 0.492446774 | -4.809659324 | 1.51E-06 |
| ENSG00000138078 | 4055.332828 | 1.614722584  | 0.335823527 | 4.808247352  | 1.52E-06 |
| ENSG00000196550 | 371.3358135 | -2.770618728 | 0.577390368 | -4.798519135 | 1.60E-06 |
| ENSG00000179918 | 4464.970532 | 1.292145165  | 0.269393108 | 4.796504173  | 1.61E-06 |
| ENSG00000188610 | 221.4453024 | -2.852723312 | 0.595148115 | -4.793299752 | 1.64E-06 |
| ENSG00000047346 | 1191.309436 | 2.975407563  | 0.620838127 | 4.792565783  | 1.65E-06 |
| ENSG00000160588 | 1286.57368  | 2.232479476  | 0.466491404 | 4.785681918  | 1.70E-06 |
| ENSG00000049541 | 1416.776718 | -1.937314111 | 0.404878613 | -4.784925775 | 1.71E-06 |
| ENSG00000138180 | 2649.426356 | -2.168190564 | 0.453204021 | -4.784137973 | 1.72E-06 |
| ENSG00000171471 | 90.71578073 | 2.487534026  | 0.520057203 | 4.783193103  | 1.73E-06 |
| ENSG00000153930 | 430.9717703 | 3.108722164  | 0.649950439 | 4.783014177  | 1.73E-06 |
| ENSG00000146670 | 1965.462216 | -2.22167994  | 0.464520101 | -4.782742307 | 1.73E-06 |
| ENSG00000087586 | 2134.695556 | -2.23847286  | 0.46812937  | -4.781739843 | 1.74E-06 |
| ENSG00000050628 | 16.11790899 | 7.482825017  | 1.565585417 | 4.779569952  | 1.76E-06 |
| ENSG00000104889 | 1159.829267 | -2.297659734 | 0.481159152 | -4.775259337 | 1.79E-06 |
| ENSG00000151790 | 18.47322722 | 6.704482429  | 1.404743989 | 4.772743278  | 1.82E-06 |
| ENSG00000165304 | 2200.608683 | -1.982419727 | 0.415529663 | -4.770826021 | 1.83E-06 |
| ENSG00000087494 | 44.33784753 | 2.77961734   | 0.583150485 | 4.766552396  | 1.87E-06 |
| ENSG00000166086 | 33.40661119 | -2.839125018 | 0.596395372 | -4.760474595 | 1.93E-06 |
| ENSG00000105974 | 10801.42482 | -2.146536715 | 0.45115748  | -4.757843565 | 1.96E-06 |
| ENSG00000140525 | 2462.919269 | -1.957342332 | 0.41202579  | -4.750533535 | 2.03E-06 |
| ENSG00000135842 | 2491.151896 | 2.379973296  | 0.50108076  | 4.749680064  | 2.04E-06 |
| ENSG00000132950 | 1235.535595 | 1.662661366  | 0.350405065 | 4.744969562  | 2.09E-06 |
| ENSG00000068489 | 1970.107851 | -2.285167156 | 0.482165136 | -4.739386956 | 2.14E-06 |
| ENSG00000145604 | 1109.493489 | -1.421569918 | 0.300192171 | -4.735532954 | 2.18E-06 |
| ENSG00000215784 | 277.6521944 | -2.868895355 | 0.607041889 | -4.726025346 | 2.29E-06 |
| ENSG00000178385 | 398.9749122 | 2.075217318  | 0.439310874 | 4.723801395  | 2.31E-06 |
| ENSG00000135451 | 1439.58057  | -2.326860008 | 0.492762914 | -4.722068043 | 2.33E-06 |
| ENSG00000177494 | 262.511127  | -3.052748741 | 0.647822791 | -4.712320686 | 2.45E-06 |
| ENSG00000127325 | 50.11632318 | 4.423341714  | 0.939344675 | 4.708965549  | 2.49E-06 |
| ENSG00000189403 | 13427.66209 | -1.974943229 | 0.419422594 | -4.708719216 | 2.49E-06 |
| ENSG00000099901 | 4080.639004 | -1.983206741 | 0.42126129  | -4.707783008 | 2.50E-06 |
| ENSG00000163376 | 854.3389438 | 3.218729462  | 0.683742046 | 4.707520151  | 2.51E-06 |
| ENSG00000111445 | 1819.446755 | -1.681711744 | 0.357770544 | -4.700531595 | 2.59E-06 |
| ENSG00000246130 | 25.96047177 | 4.318031667  | 0.919082605 | 4.698197575  | 2.62E-06 |
| ENSG00000184588 | 2125.605306 | -1.982125403 | 0.421939502 | -4.697653079 | 2.63E-06 |
| ENSG00000260442 | 49.39386577 | -3.079833743 | 0.655764315 | -4.696555867 | 2.65E-06 |
| ENSG00000051180 | 454.5441607 | -2.310574748 | 0.492353872 | -4.692914745 | 2.69E-06 |
| ENSG00000157456 | 1863.652134 | -2.305359533 | 0.491428274 | -4.691141419 | 2.72E-06 |

|                 |             |              |             |              |          |
|-----------------|-------------|--------------|-------------|--------------|----------|
| ENSG00000112312 | 1056.894779 | -1.76223628  | 0.375822607 | -4.689010845 | 2.75E-06 |
| ENSG00000172901 | 275.1194379 | 2.426111507  | 0.517554662 | 4.687643037  | 2.76E-06 |
| ENSG00000130600 | 77.90195604 | -2.860655962 | 0.610889037 | -4.682775081 | 2.83E-06 |
| ENSG00000109805 | 3111.15185  | -2.270141906 | 0.484831779 | -4.682329019 | 2.84E-06 |
| ENSG00000184178 | 304.7131828 | -1.741836869 | 0.372167933 | -4.680244357 | 2.87E-06 |
| ENSG00000171903 | 7538.445331 | 2.860734105  | 0.61217703  | 4.67305038   | 2.97E-06 |
| ENSG00000109255 | 711.443537  | -2.509693017 | 0.537180416 | -4.671974151 | 2.98E-06 |
| ENSG00000165197 | 103.4312236 | 2.019953665  | 0.432687218 | 4.66839227   | 3.04E-06 |
| ENSG00000197785 | 1782.205563 | -1.806503104 | 0.387414718 | -4.662969738 | 3.12E-06 |
| ENSG00000169607 | 1023.666889 | -2.279966533 | 0.489094381 | -4.661608519 | 3.14E-06 |
| ENSG00000111181 | 47.00247837 | 4.78244052   | 1.028274557 | 4.650937325  | 3.30E-06 |
| ENSG00000136535 | 79.97516948 | 3.581815976  | 0.771084708 | 4.64516536   | 3.40E-06 |
| ENSG00000077152 | 1452.747917 | -2.3611341   | 0.508448671 | -4.643800315 | 3.42E-06 |
| ENSG00000147883 | 647.2335721 | 1.40067539   | 0.301693621 | 4.642708014  | 3.44E-06 |
| ENSG00000245954 | 352.8319669 | 3.638812232  | 0.784847968 | 4.636327517  | 3.55E-06 |
| ENSG00000111788 | 439.7457153 | -2.169312323 | 0.467945367 | -4.63582391  | 3.56E-06 |
| ENSG00000080031 | 1432.16721  | 1.511983419  | 0.326203123 | 4.635097934  | 3.57E-06 |
| ENSG00000259781 | 422.8655263 | -2.160496861 | 0.466175645 | -4.634512517 | 3.58E-06 |
| ENSG00000151694 | 4044.42591  | 1.563455779  | 0.337538119 | 4.631938411  | 3.62E-06 |
| ENSG00000164463 | 913.2558063 | 1.65975146   | 0.358834593 | 4.625394235  | 3.74E-06 |
| ENSG00000121931 | 1938.025761 | 1.824662809  | 0.394952712 | 4.619952599  | 3.84E-06 |
| ENSG00000244693 | 87.08441843 | 2.617830206  | 0.567023879 | 4.61679006   | 3.90E-06 |
| ENSG00000095794 | 1403.672453 | 2.434251748  | 0.527378238 | 4.61576071   | 3.92E-06 |
| ENSG00000115163 | 557.1561669 | -2.706333419 | 0.586877708 | -4.611409466 | 4.00E-06 |
| ENSG00000250899 | 302.1873853 | -1.717226695 | 0.37289951  | -4.605065567 | 4.12E-06 |
| ENSG00000080839 | 589.7719839 | -1.561954361 | 0.339577727 | -4.599696145 | 4.23E-06 |
| ENSG00000175105 | 1182.153312 | 1.670751347  | 0.363587506 | 4.595183601  | 4.32E-06 |
| ENSG00000248049 | 487.0421013 | 1.77046883   | 0.385838436 | 4.588627426  | 4.46E-06 |
| ENSG00000168077 | 1047.43054  | -1.603683796 | 0.3497168   | -4.585664159 | 4.53E-06 |
| ENSG00000271522 | 31.47899217 | 4.143568351  | 0.903937007 | 4.583912729  | 4.56E-06 |
| ENSG00000198901 | 3439.109024 | -2.178673688 | 0.475453045 | -4.58231094  | 4.60E-06 |
| ENSG00000170345 | 6659.561529 | 1.798642069  | 0.392765413 | 4.5794309    | 4.66E-06 |
| ENSG00000160446 | 611.9806135 | -1.773959542 | 0.387420924 | -4.578894506 | 4.67E-06 |
| ENSG00000177225 | 1940.088204 | -1.437496202 | 0.313993453 | -4.578108843 | 4.69E-06 |
| ENSG00000010292 | 7417.125098 | -1.869798285 | 0.408562708 | -4.576527051 | 4.73E-06 |
| ENSG00000163918 | 1580.459959 | -1.962732984 | 0.429643975 | -4.568277691 | 4.92E-06 |
| ENSG00000164972 | 59.90929787 | 3.849882233  | 0.842820564 | 4.567855128  | 4.93E-06 |
| ENSG00000175785 | 74.32534594 | -2.323536085 | 0.509116764 | -4.56385696  | 5.02E-06 |
| ENSG00000095002 | 1951.840412 | -1.993863255 | 0.436907552 | -4.56358158  | 5.03E-06 |
| ENSG00000091592 | 1317.576427 | 1.692442835  | 0.371242021 | 4.558866561  | 5.14E-06 |
| ENSG00000176619 | 9752.044507 | -1.647880088 | 0.361647223 | -4.556595442 | 5.20E-06 |
| ENSG00000226979 | 33.06259634 | 4.620108319  | 1.01401506  | 4.556252169  | 5.21E-06 |
| ENSG00000257052 | 20.54433212 | 5.43160651   | 1.192299807 | 4.555571071  | 5.22E-06 |
| ENSG00000205274 | 11.02477285 | 6.93408165   | 1.522308569 | 4.554977743  | 5.24E-06 |
| ENSG00000105011 | 1882.289246 | -2.131541943 | 0.468094936 | -4.553653076 | 5.27E-06 |
| ENSG00000178921 | 1193.493676 | -2.227386521 | 0.489346322 | -4.551758995 | 5.32E-06 |
| ENSG00000124171 | 2160.448924 | 1.271050271  | 0.279346994 | 4.550076777  | 5.36E-06 |

|                 |             |              |             |              |          |
|-----------------|-------------|--------------|-------------|--------------|----------|
| ENSG00000076382 | 2012.017654 | -2.117908015 | 0.466121443 | -4.543682872 | 5.53E-06 |
| ENSG00000166965 | 813.0182517 | -2.103152527 | 0.463558302 | -4.536975215 | 5.71E-06 |
| ENSG00000197744 | 3003.985261 | -1.952427052 | 0.430340465 | -4.536935773 | 5.71E-06 |
| ENSG00000143507 | 306.7876093 | 1.531715561  | 0.337629038 | 4.536681946  | 5.71E-06 |
| ENSG00000117650 | 1570.461081 | -2.707967581 | 0.597164088 | -4.534712715 | 5.77E-06 |
| ENSG00000118785 | 671.5224752 | 2.573401042  | 0.568035464 | 4.530352775  | 5.89E-06 |
| ENSG00000267259 | 28.97286427 | 3.205228284  | 0.708965564 | 4.520992904  | 6.16E-06 |
| ENSG00000161800 | 3339.74474  | -1.867323906 | 0.413085981 | -4.520424304 | 6.17E-06 |
| ENSG00000072571 | 1885.522707 | -2.189114455 | 0.485123769 | -4.512486489 | 6.41E-06 |
| ENSG00000140830 | 1534.676918 | 2.082314994  | 0.461636346 | 4.510725839  | 6.46E-06 |
| ENSG00000149503 | 2174.030292 | -1.731609287 | 0.383890017 | -4.510691113 | 6.46E-06 |
| ENSG00000132646 | 5827.300899 | -1.761526583 | 0.390613285 | -4.509643296 | 6.49E-06 |
| ENSG00000029993 | 3155.619987 | -1.857489255 | 0.412105267 | -4.507317438 | 6.57E-06 |
| ENSG00000235027 | 106.0996482 | 4.30949159   | 0.956200427 | 4.506891513  | 6.58E-06 |
| ENSG00000260565 | 496.6520584 | 2.015567546  | 0.447287045 | 4.506205958  | 6.60E-06 |
| ENSG00000261114 | 81.68005049 | 2.177415735  | 0.484082394 | 4.49802712   | 6.86E-06 |
| ENSG00000164104 | 6448.741202 | -2.229987446 | 0.495864107 | -4.497174553 | 6.89E-06 |
| ENSG00000120885 | 38081.07916 | 3.040575711  | 0.67626943  | 4.496101077  | 6.92E-06 |
| ENSG00000179409 | 1754.672719 | -1.457030962 | 0.325395179 | -4.477727561 | 7.54E-06 |
| ENSG00000136870 | 1404.604603 | 2.101968182  | 0.469780367 | 4.47436362   | 7.66E-06 |
| ENSG00000205336 | 2751.796964 | 1.141191413  | 0.255077076 | 4.47390816   | 7.68E-06 |
| ENSG00000120802 | 5976.104041 | -1.768462789 | 0.396131001 | -4.464338274 | 8.03E-06 |
| ENSG00000120686 | 4121.540346 | 1.324402054  | 0.296696918 | 4.463821412  | 8.05E-06 |
| ENSG00000132780 | 5425.424441 | -1.43348855  | 0.321439917 | -4.459584746 | 8.21E-06 |
| ENSG00000101447 | 1598.432081 | -1.775445163 | 0.39991791  | -4.439524008 | 9.02E-06 |
| ENSG00000256128 | 45.37049881 | 2.439930571  | 0.549600108 | 4.439465231  | 9.02E-06 |
| ENSG00000230825 | 29.96175592 | 4.024825299  | 0.906936658 | 4.437824037  | 9.09E-06 |
| ENSG00000196632 | 36.31170985 | 3.754096852  | 0.84613408  | 4.436763558  | 9.13E-06 |
| ENSG00000132823 | 3130.19044  | 2.093652792  | 0.472212947 | 4.43370476   | 9.26E-06 |
| ENSG00000134222 | 738.1599262 | -2.371695322 | 0.535063442 | -4.432549743 | 9.31E-06 |
| ENSG00000265415 | 163.930454  | -2.264146132 | 0.51083911  | -4.43220984  | 9.33E-06 |
| ENSG00000138271 | 61.37151    | 2.094098515  | 0.472748403 | 4.429625779  | 9.44E-06 |
| ENSG00000057657 | 193.6288804 | 1.861076459  | 0.420251024 | 4.428487625  | 9.49E-06 |
| ENSG00000184207 | 832.9357294 | -1.799486899 | 0.40637756  | -4.42811581  | 9.51E-06 |
| ENSG00000221963 | 166.6252015 | 2.020295693  | 0.45652881  | 4.42534107   | 9.63E-06 |
| ENSG00000138378 | 323.6188904 | 1.59508304   | 0.360474344 | 4.4249558    | 9.65E-06 |
| ENSG00000113742 | 2859.905561 | 2.004653822  | 0.45304913  | 4.424804488  | 9.65E-06 |
| ENSG00000102359 | 234.7527584 | 2.258140292  | 0.510992547 | 4.419125689  | 9.91E-06 |
| ENSG00000084764 | 1533.379535 | 1.623692303  | 0.367430916 | 4.419041053  | 9.91E-06 |
| ENSG00000102580 | 6957.122067 | 1.216218829  | 0.275573689 | 4.413406935  | 1.02E-05 |
| ENSG00000179562 | 2967.800444 | 1.631235282  | 0.369850024 | 4.410531774  | 1.03E-05 |
| ENSG00000167670 | 1542.59812  | -1.896260371 | 0.430125818 | -4.408617874 | 1.04E-05 |
| ENSG00000006047 | 99.04640596 | -2.859625458 | 0.649345132 | -4.403860627 | 1.06E-05 |
| ENSG00000085999 | 643.7859466 | -2.093249994 | 0.476275367 | -4.39504148  | 1.11E-05 |
| ENSG00000117399 | 6377.456511 | -2.417514041 | 0.5502441   | -4.393530149 | 1.12E-05 |
| ENSG00000100219 | 5070.665917 | 1.210578919  | 0.275922359 | 4.387389711  | 1.15E-05 |
| ENSG00000136492 | 846.8772292 | -1.807712068 | 0.412305254 | -4.384402214 | 1.16E-05 |



|                 |             |              |             |              |          |
|-----------------|-------------|--------------|-------------|--------------|----------|
| ENSG00000176974 | 1484.782742 | -1.711606115 | 0.390397566 | -4.384264305 | 1.16E-05 |
| ENSG00000196110 | 547.4291311 | 1.717959615  | 0.392573823 | 4.376144093  | 1.21E-05 |
| ENSG00000227398 | 359.2519456 | 2.440349678  | 0.559065544 | 4.36505112   | 1.27E-05 |
| ENSG00000102879 | 113.5964543 | -2.057138642 | 0.471330362 | -4.364536652 | 1.27E-05 |
| ENSG00000115884 | 2024.283232 | -2.46721305  | 0.565496504 | -4.362914769 | 1.28E-05 |
| ENSG00000109220 | 627.7310529 | 1.888937374  | 0.433024586 | 4.362194278  | 1.29E-05 |
| ENSG00000078900 | 604.8230818 | -1.415866178 | 0.32461899  | -4.361624616 | 1.29E-05 |
| ENSG00000253729 | 15917.6592  | -1.438901473 | 0.329926673 | -4.361276581 | 1.29E-05 |
| ENSG00000135828 | 978.8444989 | 2.167334858  | 0.497765261 | 4.354130404  | 1.34E-05 |
| ENSG00000138160 | 2042.975283 | -1.940636907 | 0.446155165 | -4.349690558 | 1.36E-05 |
| ENSG00000204054 | 2888.856851 | 1.759566593  | 0.404730302 | 4.347503968  | 1.38E-05 |
| ENSG00000105676 | 843.6796847 | -1.524976736 | 0.351026435 | -4.344335879 | 1.40E-05 |
| ENSG00000071537 | 7724.236623 | 1.190377425  | 0.274055061 | 4.343570299  | 1.40E-05 |
| ENSG00000132837 | 131.5742787 | 1.649548975  | 0.379880654 | 4.342282134  | 1.41E-05 |
| ENSG00000109685 | 6312.711023 | -1.590227194 | 0.366333662 | -4.34092566  | 1.42E-05 |
| ENSG00000167470 | 8552.211002 | 1.385642328  | 0.319353114 | 4.338903448  | 1.43E-05 |
| ENSG00000189057 | 316.1497367 | -1.944126974 | 0.44810535  | -4.338548906 | 1.43E-05 |
| ENSG00000236039 | 10.66179857 | 6.885971466  | 1.587782809 | 4.336847222  | 1.45E-05 |
| ENSG00000087589 | 53.1270845  | 2.903408947  | 0.669624491 | 4.335876283  | 1.45E-05 |
| ENSG00000156504 | 3733.348331 | -1.473086217 | 0.340554084 | -4.325557341 | 1.52E-05 |
| ENSG00000232450 | 94.99934198 | 3.160511074  | 0.731630637 | 4.319817833  | 1.56E-05 |
| ENSG00000171503 | 1474.350882 | 1.543454997  | 0.357319759 | 4.31953442   | 1.56E-05 |
| ENSG00000128973 | 642.9905167 | -1.36790039  | 0.316782435 | -4.318106809 | 1.57E-05 |
| ENSG00000148926 | 5269.428115 | 1.685022105  | 0.390481496 | 4.315241878  | 1.59E-05 |
| ENSG00000171877 | 2818.80624  | -1.383435435 | 0.320800755 | -4.312444446 | 1.61E-05 |
| ENSG00000065057 | 385.991149  | -1.918881026 | 0.445105805 | -4.311067174 | 1.62E-05 |
| ENSG00000135924 | 4136.819212 | 2.116954262  | 0.49142794  | 4.307761303  | 1.65E-05 |
| ENSG00000189410 | 495.3794791 | -1.491196214 | 0.346532511 | -4.303192826 | 1.68E-05 |
| ENSG00000249328 | 35.0008738  | 3.375443725  | 0.784594022 | 4.302153257  | 1.69E-05 |
| ENSG00000097046 | 1119.093934 | -2.077419529 | 0.483293158 | -4.298466668 | 1.72E-05 |
| ENSG00000120709 | 5991.751098 | 2.212348321  | 0.514979536 | 4.295992687  | 1.74E-05 |
| ENSG00000117877 | 337.5870855 | -1.920830415 | 0.447262692 | -4.294635904 | 1.75E-05 |
| ENSG00000131018 | 1289.923377 | 2.105691831  | 0.490812667 | 4.290214927  | 1.79E-05 |
| ENSG00000251003 | 2010.485186 | 2.115140206  | 0.493277879 | 4.287928355  | 1.80E-05 |
| ENSG00000101003 | 1147.375269 | -2.039900958 | 0.476964211 | -4.276842809 | 1.90E-05 |
| ENSG00000184661 | 1228.42166  | -1.831225364 | 0.428203256 | -4.276533019 | 1.90E-05 |
| ENSG00000196189 | 49.5262011  | 3.279630964  | 0.767324871 | 4.274110078  | 1.92E-05 |
| ENSG00000113811 | 3659.59292  | 2.279728587  | 0.533699086 | 4.271561725  | 1.94E-05 |
| ENSG00000170727 | 553.2795265 | -2.189093926 | 0.512652065 | -4.270135778 | 1.95E-05 |
| ENSG00000117984 | 5007.016748 | 2.131660348  | 0.499420466 | 4.268267904  | 1.97E-05 |
| ENSG00000132967 | 295.4259243 | -2.010195693 | 0.47112898  | -4.266762983 | 1.98E-05 |
| ENSG00000197275 | 220.3890607 | -1.953990797 | 0.458216914 | -4.264335816 | 2.00E-05 |
| ENSG00000186193 | 1525.02664  | -1.873724194 | 0.43955891  | -4.262737376 | 2.02E-05 |
| ENSG00000023287 | 5932.273944 | 1.568286854  | 0.368132257 | 4.260118003  | 2.04E-05 |
| ENSG00000116649 | 1768.973349 | -1.819732801 | 0.427815535 | -4.253545402 | 2.10E-05 |
| ENSG00000198826 | 3162.146573 | -2.045314876 | 0.480891778 | -4.253170816 | 2.11E-05 |
| ENSG00000267374 | 94.26576417 | -2.156288237 | 0.50779842  | -4.246346885 | 2.17E-05 |

|                 |             |              |             |              |          |
|-----------------|-------------|--------------|-------------|--------------|----------|
| ENSG00000234776 | 16.97719458 | 4.734115154  | 1.114947874 | 4.246041691  | 2.18E-05 |
| ENSG00000144747 | 2501.876824 | 1.23303206   | 0.290414048 | 4.245772783  | 2.18E-05 |
| ENSG00000161980 | 376.7857727 | -1.562591665 | 0.368107591 | -4.244931932 | 2.19E-05 |
| ENSG00000091513 | 53.86190749 | 1.944823662  | 0.458419673 | 4.242452444  | 2.21E-05 |
| ENSG00000164362 | 145.4327568 | -3.469089231 | 0.817723291 | -4.242375469 | 2.21E-05 |
| ENSG00000232811 | 91.82952344 | 2.292385983  | 0.5403983   | 4.242030335  | 2.22E-05 |
| ENSG00000140534 | 960.0192279 | -2.055579019 | 0.48480685  | -4.239995823 | 2.24E-05 |
| ENSG00000102967 | 503.8657192 | -2.062671177 | 0.486845989 | -4.236804297 | 2.27E-05 |
| ENSG00000137804 | 3781.757517 | -1.868764749 | 0.44122932  | -4.235359401 | 2.28E-05 |
| ENSG00000120053 | 15344.05072 | 1.955654502  | 0.462283296 | 4.230424326  | 2.33E-05 |
| ENSG00000186281 | 523.6723518 | -2.152859423 | 0.509027394 | -4.229358674 | 2.34E-05 |
| ENSG00000231131 | 635.6393413 | -2.249180553 | 0.532162283 | -4.226493733 | 2.37E-05 |
| ENSG00000229512 | 42.47869743 | 4.505724527  | 1.066397401 | 4.225183333  | 2.39E-05 |
| ENSG00000176274 | 143.8218988 | 2.5662826    | 0.607397996 | 4.225042916  | 2.39E-05 |
| ENSG00000156639 | 4286.380369 | 1.724096231  | 0.408224483 | 4.223402326  | 2.41E-05 |
| ENSG00000088970 | 894.3530347 | 1.422993407  | 0.337039647 | 4.22203566   | 2.42E-05 |
| ENSG00000138111 | 883.3094164 | -1.831477994 | 0.434009411 | -4.21990387  | 2.44E-05 |
| ENSG00000165891 | 953.0866342 | -1.986898644 | 0.470888481 | -4.219467502 | 2.45E-05 |
| ENSG00000117226 | 124.8832239 | 2.212906522  | 0.524460331 | 4.219397337  | 2.45E-05 |
| ENSG00000130713 | 1810.58995  | -1.411268747 | 0.334717809 | -4.216294167 | 2.48E-05 |
| ENSG00000233822 | 130.0045106 | 2.143086832  | 0.508314015 | 4.216068747  | 2.49E-05 |
| ENSG00000163535 | 1396.800462 | -1.869092913 | 0.443524557 | -4.214181344 | 2.51E-05 |
| ENSG00000182831 | 5543.543842 | 1.651180975  | 0.392161234 | 4.210464554  | 2.55E-05 |
| ENSG00000173638 | 775.3643489 | -2.180255445 | 0.517975549 | -4.209186034 | 2.56E-05 |
| ENSG00000104549 | 2866.183969 | -1.376531496 | 0.327646381 | -4.201271786 | 2.65E-05 |
| ENSG00000101605 | 135.1199537 | 1.549131361  | 0.368736117 | 4.201192365  | 2.66E-05 |
| ENSG00000185955 | 74.97663779 | 3.225854664  | 0.768151435 | 4.199503534  | 2.68E-05 |
| ENSG00000100350 | 762.1391536 | -1.684706802 | 0.401383839 | -4.197246219 | 2.70E-05 |
| ENSG00000225434 | 54.02556536 | 2.418699931  | 0.576744672 | 4.193710057  | 2.74E-05 |
| ENSG00000173575 | 9410.817775 | 1.302008905  | 0.310687741 | 4.190731508  | 2.78E-05 |
| ENSG00000198010 | 14.55916576 | 6.356231762  | 1.517230613 | 4.189364299  | 2.80E-05 |
| ENSG00000183696 | 5256.609514 | 2.531028939  | 0.604264402 | 4.188611694  | 2.81E-05 |
| ENSG00000121211 | 515.3849305 | -2.229921699 | 0.5325087   | -4.187577962 | 2.82E-05 |
| ENSG00000166987 | 2291.735356 | 1.150892857  | 0.275067571 | 4.184036864  | 2.86E-05 |
| ENSG00000179674 | 85.02490579 | 2.295421493  | 0.54864036  | 4.183836376  | 2.87E-05 |
| ENSG00000102900 | 2924.562207 | -1.459575639 | 0.349243664 | -4.179247294 | 2.92E-05 |
| ENSG00000154146 | 351.020917  | -1.291413432 | 0.309006265 | -4.179246767 | 2.92E-05 |
| ENSG00000024526 | 2276.976665 | -1.683434614 | 0.402822793 | -4.179094742 | 2.93E-05 |
| ENSG00000005238 | 1890.481792 | 1.878183935  | 0.449536627 | 4.17804428   | 2.94E-05 |
| ENSG00000159917 | 449.976147  | 2.60446151   | 0.624128303 | 4.172958507  | 3.01E-05 |
| ENSG00000175984 | 709.543617  | 1.533466575  | 0.367499356 | 4.17270547   | 3.01E-05 |
| ENSG00000229261 | 90.42229264 | 3.391057102  | 0.813423074 | 4.16887252   | 3.06E-05 |
| ENSG00000261824 | 720.8890992 | 1.282089912  | 0.307629471 | 4.167643329  | 3.08E-05 |
| ENSG00000151025 | 248.8190751 | 1.555296054  | 0.373189713 | 4.167574828  | 3.08E-05 |
| ENSG00000162944 | 28.08434172 | 2.458512257  | 0.590017787 | 4.166844307  | 3.09E-05 |
| ENSG00000031081 | 796.562824  | 2.270177415  | 0.544830278 | 4.166760745  | 3.09E-05 |
| ENSG00000130052 | 301.8166385 | -2.113490106 | 0.507398748 | -4.165343557 | 3.11E-05 |

|                 |             |              |             |              |          |
|-----------------|-------------|--------------|-------------|--------------|----------|
| ENSG00000111664 | 169.1388903 | -2.039790483 | 0.489890001 | -4.163772434 | 3.13E-05 |
| ENSG00000186832 | 56.54314899 | 2.651056616  | 0.636979416 | 4.161918816  | 3.16E-05 |
| ENSG00000170949 | 1941.52129  | 1.443528923  | 0.346867406 | 4.161615932  | 3.16E-05 |
| ENSG00000149636 | 864.4543803 | -1.708261092 | 0.410841767 | -4.157953808 | 3.21E-05 |
| ENSG00000148346 | 35.08324979 | 2.961730796  | 0.712344162 | 4.157724528  | 3.21E-05 |
| ENSG00000174038 | 50.59241908 | 4.277279233  | 1.02906668  | 4.156464608  | 3.23E-05 |
| ENSG00000134690 | 1736.265876 | -2.218146516 | 0.533948086 | -4.154236288 | 3.26E-05 |
| ENSG00000163512 | 1376.416492 | 1.725001031  | 0.415946825 | 4.147167205  | 3.37E-05 |
| ENSG00000198380 | 6904.488596 | 1.200801294  | 0.289571429 | 4.146822428  | 3.37E-05 |
| ENSG00000129673 | 26.26951331 | -3.121706788 | 0.75301112  | -4.145631725 | 3.39E-05 |
| ENSG00000140986 | 64.83030402 | 3.397413541  | 0.819878738 | 4.143800034  | 3.42E-05 |
| ENSG00000164220 | 63.18812915 | 3.27534807   | 0.79077002  | 4.141972995  | 3.44E-05 |
| ENSG00000068323 | 2792.441865 | 1.481473759  | 0.357884419 | 4.139531308  | 3.48E-05 |
| ENSG00000181652 | 309.783615  | 1.89192357   | 0.457406164 | 4.136200422  | 3.53E-05 |
| ENSG00000109083 | 662.1373892 | 1.387198551  | 0.335417973 | 4.135731122  | 3.54E-05 |
| ENSG00000120549 | 2248.124432 | 1.946714417  | 0.470714741 | 4.135656367  | 3.54E-05 |
| ENSG00000100714 | 2457.898528 | -2.26506748  | 0.547808363 | -4.134780761 | 3.55E-05 |
| ENSG00000247199 | 24.24757132 | 3.821689003  | 0.924563391 | 4.133506733  | 3.57E-05 |
| ENSG00000065833 | 9157.211265 | 1.934000286  | 0.468507948 | 4.127998882  | 3.66E-05 |
| ENSG00000164509 | 200.5001307 | 2.411290295  | 0.584329883 | 4.126590762  | 3.68E-05 |
| ENSG00000135241 | 2131.306328 | 1.525718945  | 0.369754802 | 4.1262992    | 3.69E-05 |
| ENSG00000128951 | 1193.811628 | -2.048398921 | 0.49653891  | -4.125354288 | 3.70E-05 |
| ENSG00000158793 | 2128.257529 | 1.328065588  | 0.321968765 | 4.124827413  | 3.71E-05 |
| ENSG00000226430 | 11.0016933  | 5.949105635  | 1.443111541 | 4.122415673  | 3.75E-05 |
| ENSG00000260916 | 236.438147  | 1.236033133  | 0.300036697 | 4.119606513  | 3.80E-05 |
| ENSG00000197587 | 163.1696274 | -2.192626961 | 0.53227905  | -4.119318539 | 3.80E-05 |
| ENSG00000171793 | 2437.733594 | -1.540919246 | 0.374319826 | -4.116584645 | 3.85E-05 |
| ENSG00000082516 | 1866.497644 | -1.489565704 | 0.361873474 | -4.116261098 | 3.85E-05 |
| ENSG00000157514 | 1083.774656 | 1.344885295  | 0.326969366 | 4.113184405  | 3.90E-05 |
| ENSG00000171786 | 85.94297304 | 2.574760467  | 0.626253661 | 4.111369922  | 3.93E-05 |
| ENSG00000103995 | 956.2978494 | -1.410318312 | 0.343043438 | -4.111194545 | 3.94E-05 |
| ENSG00000168564 | 891.5364511 | 1.814157902  | 0.441790096 | 4.106379743  | 4.02E-05 |
| ENSG00000196998 | 834.5370927 | 1.688399058  | 0.411429353 | 4.103739911  | 4.07E-05 |
| ENSG00000132361 | 4650.225737 | -1.435888432 | 0.349943415 | -4.103201752 | 4.07E-05 |
| ENSG00000137960 | 49.37073811 | 4.543073692  | 1.107283203 | 4.102901298  | 4.08E-05 |
| ENSG00000173530 | 6572.646606 | 1.501788403  | 0.366034068 | 4.102865099  | 4.08E-05 |
| ENSG00000164611 | 2421.422568 | -1.908508725 | 0.465169796 | -4.10282168  | 4.08E-05 |
| ENSG00000184445 | 2348.981459 | -1.77600863  | 0.433253847 | -4.099233375 | 4.15E-05 |
| ENSG00000260655 | 37.05406985 | -3.356814034 | 0.819952639 | -4.093912106 | 4.24E-05 |
| ENSG00000151929 | 15078.90779 | 2.430792512  | 0.594104837 | 4.091521158  | 4.29E-05 |
| ENSG00000158683 | 74.44429166 | 3.06721761   | 0.74968169  | 4.09135991   | 4.29E-05 |
| ENSG00000141556 | 3433.558178 | -1.907383942 | 0.46621444  | -4.091215929 | 4.29E-05 |
| ENSG00000159348 | 1905.045037 | 2.284142157  | 0.558371595 | 4.090720549  | 4.30E-05 |
| ENSG00000187800 | 1255.473712 | 1.211938345  | 0.296334177 | 4.08976905   | 4.32E-05 |
| ENSG00000183763 | 394.9065876 | -1.872347416 | 0.457968303 | -4.088377743 | 4.34E-05 |
| ENSG00000177595 | 871.5218813 | -1.971529687 | 0.48241191  | -4.086818023 | 4.37E-05 |
| ENSG00000165861 | 1229.498448 | 1.806189606  | 0.442079927 | 4.085663007  | 4.40E-05 |

|                 |             |              |             |              |          |
|-----------------|-------------|--------------|-------------|--------------|----------|
| ENSG00000106628 | 4251.541704 | -1.495253888 | 0.366112017 | -4.084143157 | 4.42E-05 |
| ENSG00000154920 | 524.0450128 | -2.186012913 | 0.535320745 | -4.083557257 | 4.44E-05 |
| ENSG00000185015 | 882.011814  | 1.445386387  | 0.353957384 | 4.083503982  | 4.44E-05 |
| ENSG00000112039 | 598.1212421 | -1.719554471 | 0.421139226 | -4.083102131 | 4.44E-05 |
| ENSG00000187456 | 95.09741601 | -2.340570701 | 0.573325161 | -4.082448947 | 4.46E-05 |
| ENSG00000185924 | 369.00314   | -1.905352564 | 0.467114485 | -4.078984112 | 4.52E-05 |
| ENSG00000164695 | 1050.972223 | 1.338890355  | 0.328525224 | 4.075456792  | 4.59E-05 |
| ENSG00000074047 | 442.8580745 | -1.772927938 | 0.435177689 | -4.074032248 | 4.62E-05 |
| ENSG00000163393 | 631.8461516 | 1.659093154  | 0.407319997 | 4.073193479  | 4.64E-05 |
| ENSG00000104886 | 1104.73006  | -1.548764232 | 0.380517201 | -4.070155645 | 4.70E-05 |
| ENSG00000171124 | 68.67553889 | 2.412476874  | 0.592738372 | 4.070053479  | 4.70E-05 |
| ENSG00000243477 | 243.1106116 | -2.197443334 | 0.540276754 | -4.067255011 | 4.76E-05 |
| ENSG00000131620 | 1965.82953  | -1.229408725 | 0.302276358 | -4.067167976 | 4.76E-05 |
| ENSG00000164053 | 408.0615336 | -1.472473857 | 0.362059573 | -4.066938053 | 4.76E-05 |
| ENSG00000183508 | 607.9702416 | 1.895403702  | 0.466179635 | 4.065822613  | 4.79E-05 |
| ENSG00000185818 | 631.5178012 | -1.448422275 | 0.356374555 | -4.064325732 | 4.82E-05 |
| ENSG00000180353 | 33.87322088 | 3.192872995  | 0.785607926 | 4.0642067    | 4.82E-05 |
| ENSG00000165905 | 1641.063976 | -2.14537053  | 0.528525039 | -4.059165358 | 4.92E-05 |
| ENSG00000256304 | 53.96776928 | 3.24859709   | 0.801297621 | 4.054170391  | 5.03E-05 |
| ENSG00000261761 | 77.37367175 | 2.252477563  | 0.555797824 | 4.052692306  | 5.06E-05 |
| ENSG00000164818 | 1973.29941  | -1.515114485 | 0.373870845 | -4.052507721 | 5.07E-05 |
| ENSG00000164683 | 141.8103611 | 1.652621532  | 0.407919411 | 4.051343196  | 5.09E-05 |
| ENSG00000033100 | 2542.624448 | 2.394175903  | 0.591253882 | 4.049319549  | 5.14E-05 |
| ENSG00000136108 | 3402.106539 | -1.624485117 | 0.401979037 | -4.041218494 | 5.32E-05 |
| ENSG00000180210 | 16.74832646 | 4.611794937  | 1.141641865 | 4.039616168  | 5.35E-05 |
| ENSG00000128050 | 11991.84789 | -2.115637764 | 0.523726663 | -4.03958384  | 5.35E-05 |
| ENSG00000120129 | 1465.810963 | 1.576848622  | 0.390507438 | 4.037947729  | 5.39E-05 |
| ENSG00000169429 | 692.5551363 | 1.762633784  | 0.436525756 | 4.037868919  | 5.39E-05 |
| ENSG00000164970 | 3541.135336 | 2.36496935   | 0.585749867 | 4.037507275  | 5.40E-05 |
| ENSG00000100526 | 880.2725412 | -2.010526773 | 0.498158004 | -4.035921845 | 5.44E-05 |
| ENSG00000231940 | 33.76133962 | 2.709376008  | 0.671414134 | 4.035327632  | 5.45E-05 |
| ENSG00000179958 | 1283.115609 | -1.70529968  | 0.423091516 | -4.030569313 | 5.56E-05 |
| ENSG00000198176 | 4670.006408 | -1.482952809 | 0.367927047 | -4.030562095 | 5.56E-05 |
| ENSG00000173894 | 1535.084626 | -1.680575091 | 0.41700414  | -4.030116083 | 5.57E-05 |
| ENSG00000135776 | 839.4735784 | -1.496626155 | 0.371656307 | -4.02690907  | 5.65E-05 |
| ENSG00000237979 | 9.00722824  | 6.641171185  | 1.649392051 | 4.026435789  | 5.66E-05 |
| ENSG00000083799 | 2268.76395  | 2.111496587  | 0.5245637   | 4.025243433  | 5.69E-05 |
| ENSG00000167513 | 2334.135605 | -1.669424376 | 0.414897353 | -4.023704576 | 5.73E-05 |
| ENSG00000116977 | 3185.704933 | 1.831368243  | 0.455510464 | 4.020474588  | 5.81E-05 |
| ENSG00000263934 | 131.0637971 | 1.907566719  | 0.474580841 | 4.019476879  | 5.83E-05 |
| ENSG00000241634 | 62.49762143 | -2.304060774 | 0.573373768 | -4.018427251 | 5.86E-05 |
| ENSG00000167748 | 38.73771557 | -2.766530019 | 0.688644243 | -4.017357359 | 5.89E-05 |
| ENSG00000225855 | 312.017207  | -1.354235471 | 0.337324663 | -4.014635213 | 5.95E-05 |
| ENSG00000167523 | 472.8932888 | -1.433879852 | 0.357252777 | -4.013628287 | 5.98E-05 |
| ENSG00000166483 | 1758.372132 | -1.58325134  | 0.394513525 | -4.013173789 | 5.99E-05 |
| ENSG00000137404 | 265.4679374 | -1.614312472 | 0.402415899 | -4.01155242  | 6.03E-05 |
| ENSG00000171889 | 85.28175321 | 2.975311828  | 0.741937573 | 4.010191608  | 6.07E-05 |

|                 |             |              |             |              |          |
|-----------------|-------------|--------------|-------------|--------------|----------|
| ENSG00000116254 | 803.7376425 | -1.740252259 | 0.433964503 | -4.01012582  | 6.07E-05 |
| ENSG00000130449 | 1763.219855 | 1.649294669  | 0.411341926 | 4.009546714  | 6.08E-05 |
| ENSG00000197063 | 8711.344342 | 1.751097414  | 0.436808086 | 4.008848445  | 6.10E-05 |
| ENSG00000261094 | 90.84508358 | 2.015459768  | 0.503114537 | 4.005966077  | 6.18E-05 |
| ENSG00000258010 | 7.2043708   | 6.327017156  | 1.580071037 | 4.004261205  | 6.22E-05 |
| ENSG00000085563 | 715.6812857 | 2.111567617  | 0.527467096 | 4.003221498  | 6.25E-05 |
| ENSG00000167775 | 1084.83107  | -1.506852889 | 0.376441051 | -4.002892044 | 6.26E-05 |
| ENSG00000204604 | 1235.063872 | 1.72878882   | 0.432071925 | 4.00115981   | 6.30E-05 |
| ENSG00000237813 | 40.91538682 | -2.456999599 | 0.614428263 | -3.998838834 | 6.37E-05 |
| ENSG00000070814 | 3810.03069  | -1.39827009  | 0.349672037 | -3.99880443  | 6.37E-05 |
| ENSG00000258667 | 17.02072775 | 3.102323984  | 0.776376271 | 3.99590263   | 6.44E-05 |
| ENSG00000163009 | 80.81768703 | -2.765650817 | 0.69227769  | -3.99500209  | 6.47E-05 |
| ENSG00000051341 | 761.2903452 | -1.617569306 | 0.404914314 | -3.994843476 | 6.47E-05 |
| ENSG00000078081 | 578.6704744 | 1.116042921  | 0.279512926 | 3.99281328   | 6.53E-05 |
| ENSG00000188522 | 5429.366165 | 1.529210571  | 0.383253771 | 3.990073124  | 6.61E-05 |
| ENSG00000258469 | 63.98991248 | 2.733402989  | 0.685059499 | 3.990022757  | 6.61E-05 |
| ENSG00000088325 | 6651.086808 | -1.814110618 | 0.454820248 | -3.988632046 | 6.65E-05 |
| ENSG00000262943 | 1164.492419 | 2.314663905  | 0.580734458 | 3.985752652  | 6.73E-05 |
| ENSG00000171790 | 156.1938967 | -1.955048703 | 0.490522995 | -3.985641288 | 6.73E-05 |
| ENSG00000144554 | 1527.099961 | -1.843120365 | 0.462471333 | -3.985372137 | 6.74E-05 |
| ENSG00000073331 | 1239.149214 | 1.181075681  | 0.29642298  | 3.984426845  | 6.76E-05 |
| ENSG00000258521 | 24.43359117 | 3.853200624  | 0.967440802 | 3.982880004  | 6.81E-05 |
| ENSG00000169710 | 32120.94722 | -1.783014509 | 0.447689922 | -3.982699677 | 6.81E-05 |
| ENSG00000132600 | 671.6879561 | -1.399497919 | 0.351602119 | -3.980345518 | 6.88E-05 |
| ENSG00000117000 | 3540.265923 | 1.244274125  | 0.312687666 | 3.979287511  | 6.91E-05 |
| ENSG00000182400 | 2242.226516 | 1.119346783  | 0.281344617 | 3.978561227  | 6.93E-05 |
| ENSG00000136866 | 286.8354626 | 2.206957352  | 0.554793229 | 3.977981769  | 6.95E-05 |
| ENSG00000118523 | 3070.479512 | 2.460570305  | 0.61869255  | 3.977048546  | 6.98E-05 |
| ENSG00000139508 | 356.8810169 | 1.691975411  | 0.425456483 | 3.976847173  | 6.98E-05 |
| ENSG00000090889 | 1399.592542 | -1.726604971 | 0.434263152 | -3.975941692 | 7.01E-05 |
| ENSG00000175643 | 310.6322628 | -1.968429086 | 0.495195829 | -3.975051831 | 7.04E-05 |
| ENSG00000187951 | 966.5938761 | -1.620391191 | 0.407972424 | -3.971815485 | 7.13E-05 |
| ENSG00000146587 | 3093.871471 | 1.308822598  | 0.329642993 | 3.97042445   | 7.17E-05 |
| ENSG00000115053 | 33371.67803 | -1.424226786 | 0.358811083 | -3.969294297 | 7.21E-05 |
| ENSG00000139890 | 72.07967176 | 1.971245766  | 0.496744125 | 3.968332322  | 7.24E-05 |
| ENSG00000197044 | 218.3645698 | 2.531629746  | 0.638401903 | 3.965573617  | 7.32E-05 |
| ENSG00000184967 | 756.1443218 | -1.561309621 | 0.39375051  | -3.965225648 | 7.33E-05 |
| ENSG00000112763 | 1589.620042 | 1.721990504  | 0.4343714   | 3.964327538  | 7.36E-05 |
| ENSG00000162302 | 2196.999884 | -1.4277276   | 0.360458486 | -3.960865552 | 7.47E-05 |
| ENSG00000138075 | 15.41752634 | 3.891356594  | 0.983238749 | 3.957692469  | 7.57E-05 |
| ENSG00000129596 | 16.67401337 | 3.813448089  | 0.963607234 | 3.95747142   | 7.57E-05 |
| ENSG00000197329 | 836.4818835 | 1.265633796  | 0.320022834 | 3.954823411  | 7.66E-05 |
| ENSG00000178878 | 142.2062976 | -1.619437208 | 0.409698156 | -3.95275689  | 7.73E-05 |
| ENSG00000120437 | 783.0036124 | -1.627476876 | 0.412412537 | -3.946235217 | 7.94E-05 |
| ENSG00000234231 | 238.7554659 | 2.229241246  | 0.565134715 | 3.944619198  | 7.99E-05 |
| ENSG00000184916 | 2594.029596 | -2.17408052  | 0.551554042 | -3.941736173 | 8.09E-05 |
| ENSG00000117593 | 1116.370993 | -1.605755681 | 0.407895731 | -3.936681753 | 8.26E-05 |

|                 |             |              |             |              |             |
|-----------------|-------------|--------------|-------------|--------------|-------------|
| ENSG00000110074 | 906.7018757 | -1.487413616 | 0.377869934 | -3.936311101 | 8.27E-05    |
| ENSG00000131462 | 3616.830591 | -1.743279181 | 0.443062274 | -3.93461435  | 8.33E-05    |
| ENSG00000003393 | 5450.822554 | 2.028038911  | 0.515626467 | 3.933155182  | 8.38E-05    |
| ENSG00000111981 | 1069.621128 | 1.410877486  | 0.35888023  | 3.93133243   | 8.45E-05    |
| ENSG00000161010 | 2517.868846 | 1.406504306  | 0.357784904 | 3.931144912  | 8.45E-05    |
| ENSG00000172731 | 955.0801918 | -1.810227773 | 0.460548972 | -3.930586934 | 8.47E-05    |
| ENSG00000108433 | 1384.840162 | 1.772113832  | 0.451043784 | 3.92891754   | 8.53E-05    |
| ENSG00000118894 | 354.1362162 | -1.626362925 | 0.413976043 | -3.928640205 | 8.54E-05    |
| ENSG00000135709 | 1953.728093 | 1.809138369  | 0.46064673  | 3.927387849  | 8.59E-05    |
| ENSG00000249115 | 953.6522344 | -1.457970007 | 0.371362208 | -3.926005329 | 8.64E-05    |
| ENSG00000179041 | 905.6055245 | -1.926441158 | 0.490772887 | -3.925321077 | 8.66E-05    |
| ENSG00000111886 | 55.57901649 | 2.024976339  | 0.51598787  | 3.924465008  | 8.69E-05    |
| ENSG00000204498 | 759.2367871 | 1.171890211  | 0.298829539 | 3.921600969  | 8.80E-05    |
| ENSG00000172009 | 2978.541796 | -1.392438218 | 0.355267702 | -3.919405591 | 8.88E-05    |
| ENSG00000166471 | 5327.867078 | 1.027750623  | 0.262383286 | 3.91698206   | 8.97E-05    |
| ENSG00000158865 | 92.69379027 | 2.548044545  | 0.650948451 | 3.914356875  | 9.06E-05    |
| ENSG00000070190 | 86.61202234 | 2.256016327  | 0.576445955 | 3.913664943  | 9.09E-05    |
| ENSG00000185507 | 761.0743934 | 1.506507318  | 0.384979963 | 3.913209684  | 9.11E-05    |
| ENSG00000214776 | 73.12179536 | -1.715667964 | 0.438794388 | -3.909958766 | 9.23E-05    |
| ENSG00000164087 | 761.1958344 | -1.916448381 | 0.490194341 | -3.909568555 | 9.25E-05    |
| ENSG00000069482 | 1190.354884 | -1.543132327 | 0.394894583 | -3.907707    | 9.32E-05    |
| ENSG00000215154 | 257.8033246 | 2.149042787  | 0.550139701 | 3.906358302  | 9.37E-05    |
| ENSG00000131473 | 9903.438101 | -1.072703735 | 0.274681918 | -3.90525792  | 9.41E-05    |
| ENSG00000261324 | 29.65946015 | 2.943632016  | 0.753778129 | 3.905170371  | 9.42E-05    |
| ENSG00000188785 | 687.952974  | 1.89952518   | 0.486431708 | 3.905019246  | 9.42E-05    |
| ENSG00000184886 | 385.7711053 | -1.474361896 | 0.377566037 | -3.904911334 | 9.43E-05    |
| ENSG00000236081 | 193.4818192 | -2.772628851 | 0.710583063 | -3.90190675  | 9.54E-05    |
| ENSG00000058804 | 2576.15617  | -1.360703989 | 0.348890402 | -3.900090059 | 9.62E-05    |
| ENSG00000084774 | 3984.863799 | -2.291137802 | 0.587532219 | -3.899595165 | 9.64E-05    |
| ENSG00000175792 | 3438.577096 | -1.605333562 | 0.411766932 | -3.898646144 | 9.67E-05    |
| ENSG00000197857 | 488.5892763 | 2.101867636  | 0.539187792 | 3.89821073   | 9.69E-05    |
| ENSG00000140297 | 177.941695  | 1.771683031  | 0.454500314 | 3.898089783  | 9.70E-05    |
| ENSG00000197355 | 508.2601538 | -1.191387907 | 0.30571712  | -3.897027115 | 9.74E-05    |
| ENSG00000106245 | 2125.909002 | 1.33015527   | 0.341452079 | 3.895584046  | 9.80E-05    |
| ENSG00000233785 | 27.5300971  | 2.5652775    | 0.658710302 | 3.894394081  | 9.84E-05    |
| ENSG00000147536 | 569.6920402 | -1.524544355 | 0.391914763 | -3.88998961  | 0.000100249 |
| ENSG00000231007 | 195.3954388 | -2.548633966 | 0.655375473 | -3.888814994 | 0.000100735 |
| ENSG00000229729 | 272.7698432 | 1.667817901  | 0.428938071 | 3.888248712  | 0.00010097  |
| ENSG00000160570 | 3811.062792 | 2.001213589  | 0.514909488 | 3.886534697  | 0.000101685 |
| ENSG00000255874 | 74.0098683  | 1.560948193  | 0.401659533 | 3.886247098  | 0.000101806 |
| ENSG00000142528 | 2392.299945 | 1.946058042  | 0.501065801 | 3.883837288  | 0.000102821 |
| ENSG00000128016 | 7621.830347 | 1.539149186  | 0.396593598 | 3.880922925  | 0.000104061 |
| ENSG00000132510 | 4401.610786 | 1.464578345  | 0.377622519 | 3.878418985  | 0.000105138 |
| ENSG00000166963 | 232.4814898 | -1.618268711 | 0.417296241 | -3.87798535  | 0.000105325 |
| ENSG00000138182 | 1594.27776  | -1.533911342 | 0.395606817 | -3.877363276 | 0.000105595 |
| ENSG00000146263 | 1578.468905 | -1.603010431 | 0.413683751 | -3.87496591  | 0.00010664  |
| ENSG00000177410 | 8422.421074 | 1.251630043  | 0.323044718 | 3.874479211  | 0.000106853 |

|                 |             |              |             |              |             |
|-----------------|-------------|--------------|-------------|--------------|-------------|
| ENSG00000225190 | 2615.414675 | 1.784547758  | 0.460596565 | 3.874426979  | 0.000106876 |
| ENSG00000136436 | 8025.716769 | 1.397984476  | 0.360837094 | 3.874281495  | 0.00010694  |
| ENSG00000100564 | 1090.893497 | 1.262906405  | 0.326093938 | 3.872830058  | 0.000107579 |
| ENSG00000142731 | 1176.696059 | -1.671800726 | 0.431781247 | -3.871869693 | 0.000108004 |
| ENSG00000173230 | 7804.402919 | 1.70029047   | 0.439337922 | 3.870119979  | 0.000108782 |
| ENSG00000182010 | 517.6408488 | -1.293953544 | 0.334403497 | -3.869437841 | 0.000109087 |
| ENSG00000215717 | 1868.053653 | 1.388822527  | 0.358962881 | 3.868986464  | 0.000109289 |
| ENSG00000113739 | 5815.118299 | 1.413255841  | 0.365311474 | 3.868632498  | 0.000109447 |
| ENSG00000005471 | 14.37010757 | 6.342552331  | 1.639946651 | 3.867535768  | 0.000109941 |
| ENSG00000147121 | 682.8154893 | 1.539723017  | 0.398297013 | 3.865765913  | 0.000110741 |
| ENSG00000173875 | 2777.066421 | 1.726566625  | 0.446942982 | 3.863057918  | 0.000111976 |
| ENSG00000102547 | 632.6310232 | 2.104902117  | 0.545067307 | 3.861728798  | 0.000112588 |
| ENSG00000053438 | 45.92721949 | 2.971807919  | 0.770351787 | 3.857728339  | 0.000114446 |
| ENSG00000107249 | 607.563273  | 1.956121546  | 0.507204681 | 3.85667092   | 0.000114942 |
| ENSG00000227218 | 28.45557779 | 2.472772692  | 0.641729778 | 3.853292735  | 0.00011654  |
| ENSG00000198270 | 257.3301578 | 1.608487269  | 0.417886273 | 3.849102911  | 0.000118551 |
| ENSG00000183765 | 1105.455873 | -1.518761374 | 0.394843381 | -3.846490654 | 0.000119822 |
| ENSG00000169548 | 271.746216  | 2.365418581  | 0.615222414 | 3.844818601  | 0.000120642 |
| ENSG00000118620 | 1028.130751 | 1.973029224  | 0.513614316 | 3.841460729  | 0.000122304 |
| ENSG00000118193 | 1618.147536 | -1.829012421 | 0.476682358 | -3.836962689 | 0.000124565 |
| ENSG00000162231 | 5732.01513  | 1.915480204  | 0.499259241 | 3.836644467  | 0.000124727 |
| ENSG00000197780 | 2436.625241 | 1.96054128   | 0.511541998 | 3.832610589  | 0.000126791 |
| ENSG00000138074 | 1474.560273 | -1.435131695 | 0.374487447 | -3.832255814 | 0.000126974 |
| ENSG00000205853 | 17.50128003 | 3.916775978  | 1.022134618 | 3.831957073  | 0.000127128 |
| ENSG00000116237 | 3565.895933 | -1.26175633  | 0.32943548  | -3.830055983 | 0.000128114 |
| ENSG00000114771 | 308.0585769 | 1.70340651   | 0.444868261 | 3.829013348  | 0.000128658 |
| ENSG00000121101 | 283.0895718 | 2.217384226  | 0.579718713 | 3.824931259  | 0.000130809 |
| ENSG00000125657 | 3847.151204 | 1.996698347  | 0.522194667 | 3.823666677  | 0.000131482 |
| ENSG00000104221 | 816.8829305 | 2.541284564  | 0.664703712 | 3.823183954  | 0.000131739 |
| ENSG00000188878 | 168.5487899 | -1.709993111 | 0.447371008 | -3.822315439 | 0.000132204 |
| ENSG00000185347 | 580.108409  | -1.794150318 | 0.469524831 | -3.821204332 | 0.000132802 |
| ENSG00000135951 | 295.2908464 | 1.721929053  | 0.450706412 | 3.820511556  | 0.000133175 |
| ENSG00000088726 | 539.0131561 | 1.395549302  | 0.36536     | 3.819655408  | 0.000133638 |
| ENSG00000142733 | 769.4743876 | -1.511117565 | 0.395662535 | -3.819208112 | 0.000133881 |
| ENSG00000163002 | 716.3864465 | -1.398971581 | 0.366532041 | -3.816778413 | 0.000135205 |
| ENSG00000235448 | 66.17853051 | 2.84379421   | 0.745259298 | 3.815845329  | 0.000135718 |
| ENSG00000235217 | 49.04005117 | 2.086577054  | 0.547019028 | 3.814450589  | 0.000136486 |
| ENSG00000197822 | 1477.184166 | 1.042529388  | 0.273346884 | 3.81394283   | 0.000136767 |
| ENSG00000143179 | 2752.559453 | -1.353998856 | 0.355315733 | -3.810692102 | 0.000138578 |
| ENSG00000124151 | 4747.131552 | 1.224729256  | 0.321500494 | 3.809416409  | 0.000139295 |
| ENSG00000048471 | 1145.018731 | 2.034912793  | 0.534456925 | 3.807440224  | 0.000140413 |
| ENSG00000196262 | 41824.149   | -1.174081628 | 0.308586063 | -3.804713719 | 0.000141968 |
| ENSG00000169359 | 2627.328112 | 0.975943544  | 0.256605328 | 3.803286355  | 0.000142789 |
| ENSG00000170955 | 269.0880765 | -1.901154602 | 0.499977117 | -3.80248323  | 0.000143253 |
| ENSG00000228960 | 35.44338294 | 2.482106975  | 0.652783468 | 3.802343498  | 0.000143334 |
| ENSG00000141560 | 1195.26619  | -1.180794807 | 0.310552668 | -3.802236879 | 0.000143396 |
| ENSG00000198798 | 37.02972594 | 2.444943326  | 0.643140299 | 3.801570712  | 0.000143782 |

|                 |             |              |             |              |             |
|-----------------|-------------|--------------|-------------|--------------|-------------|
| ENSG00000100652 | 20.3651201  | 4.018981774  | 1.057745152 | 3.799574753  | 0.000144945 |
| ENSG00000156398 | 408.4870263 | -1.852414431 | 0.487630898 | -3.798804461 | 0.000145396 |
| ENSG00000154258 | 41.07751192 | 3.942214208  | 1.03791168  | 3.798217405  | 0.00014574  |
| ENSG00000159958 | 28.87492414 | -3.551250044 | 0.936382568 | -3.792520457 | 0.000149126 |
| ENSG00000200879 | 62.7491033  | 2.342885844  | 0.617768457 | 3.792498332  | 0.000149139 |
| ENSG00000177084 | 3958.426403 | -1.535624031 | 0.404958576 | -3.792052128 | 0.000149408 |
| ENSG00000167981 | 261.1958097 | 1.347366516  | 0.355319328 | 3.791987686  | 0.000149446 |
| ENSG00000237510 | 37.13074072 | -2.138463992 | 0.564008322 | -3.791546877 | 0.000149712 |
| ENSG00000196428 | 2809.41941  | 1.540915844  | 0.40671974  | 3.788642875  | 0.000151472 |
| ENSG00000186205 | 506.3212747 | -2.293384265 | 0.605543269 | -3.787316913 | 0.000152283 |
| ENSG00000162236 | 2113.727766 | 1.410400952  | 0.37251965  | 3.78611156   | 0.000153023 |
| ENSG00000128408 | 108.1164113 | -2.44700126  | 0.646406545 | -3.785545304 | 0.000153372 |
| ENSG00000174123 | 25.83450471 | 2.628074739  | 0.694239433 | 3.78554518   | 0.000153372 |
| ENSG00000157851 | 589.1648655 | -1.960678657 | 0.51801343  | -3.784995803 | 0.000153711 |
| ENSG00000240457 | 16.46668775 | 4.583234051  | 1.211363879 | 3.783532043  | 0.000154618 |
| ENSG00000119630 | 721.8075904 | 1.799121692  | 0.475531692 | 3.783389674  | 0.000154707 |
| ENSG00000083223 | 4123.354412 | 1.659319304  | 0.438851844 | 3.781046669  | 0.00015617  |
| ENSG00000237772 | 10.7713538  | 4.456198722  | 1.178616033 | 3.780874007  | 0.000156279 |
| ENSG00000161267 | 636.7414635 | -1.64373266  | 0.434932401 | -3.77928307  | 0.000157281 |
| ENSG00000107175 | 2175.988793 | 1.912004011  | 0.505954402 | 3.779004599  | 0.000157457 |
| ENSG00000092871 | 1414.821402 | 1.230790225  | 0.325692889 | 3.778990163  | 0.000157466 |
| ENSG00000107672 | 1508.12055  | -1.809882692 | 0.479338644 | -3.775791318 | 0.0001595   |
| ENSG00000110063 | 445.1049849 | -1.385346766 | 0.366995017 | -3.774838077 | 0.000160112 |
| ENSG00000270020 | 31.13434374 | 2.074584416  | 0.549747213 | 3.773706107  | 0.00016084  |
| ENSG00000186480 | 3503.902872 | -1.299225751 | 0.344341631 | -3.773071951 | 0.00016125  |
| ENSG00000267898 | 22.21875049 | 3.770777903  | 0.999701773 | 3.771902787  | 0.000162007 |
| ENSG00000215838 | 8.834078965 | 6.61351399   | 1.753873708 | 3.770803998  | 0.000162722 |
| ENSG00000146592 | 486.0598313 | 1.201029311  | 0.318521222 | 3.770641413  | 0.000162829 |
| ENSG00000116793 | 1691.070853 | 1.95978283   | 0.520054527 | 3.768417979  | 0.000164285 |
| ENSG00000166225 | 2036.113982 | 1.6630623    | 0.441364341 | 3.768003314  | 0.000164559 |
| ENSG00000179046 | 1315.828878 | 1.836411591  | 0.487883744 | 3.764035208  | 0.000167193 |
| ENSG00000058056 | 1229.755214 | -1.408262546 | 0.374197356 | -3.763421955 | 0.000167604 |
| ENSG00000214706 | 1637.415866 | -1.416600316 | 0.37651778  | -3.762372968 | 0.000168309 |
| ENSG00000118985 | 4067.949621 | 1.31118863   | 0.34850965  | 3.762273528  | 0.000168376 |
| ENSG00000120800 | 1213.484857 | -1.449971942 | 0.385425192 | -3.762006146 | 0.000168556 |
| ENSG00000196639 | 972.6974147 | 1.503156583  | 0.399713099 | 3.760588748  | 0.000169514 |
| ENSG00000102401 | 2279.097216 | 1.419340702  | 0.377535082 | 3.759493539  | 0.000170258 |
| ENSG00000143799 | 10940.37901 | -0.978486494 | 0.260422754 | -3.757300313 | 0.000171756 |
| ENSG00000164880 | 4166.315366 | -1.000633452 | 0.266369349 | -3.756563799 | 0.000172262 |
| ENSG00000114124 | 24.61432484 | 3.415715039  | 0.909293157 | 3.756450837  | 0.00017234  |
| ENSG00000243069 | 103.9952223 | 3.483183454  | 0.927401271 | 3.755853656  | 0.000172752 |
| ENSG00000169884 | 230.4092891 | -2.110889163 | 0.562271699 | -3.754215561 | 0.000173885 |
| ENSG00000131791 | 3439.150677 | 1.426993967  | 0.380136954 | 3.753894361  | 0.000174108 |
| ENSG00000092929 | 372.8288935 | -1.431949593 | 0.381530766 | -3.753169397 | 0.000174613 |
| ENSG00000162073 | 508.3633601 | -1.964726932 | 0.523517662 | -3.752933428 | 0.000174777 |
| ENSG00000057468 | 137.3557403 | 1.94836871   | 0.51939539  | 3.751224499  | 0.000175973 |
| ENSG00000148459 | 527.6497796 | -1.13598791  | 0.3028455   | -3.751047676 | 0.000176097 |



|                 |             |              |             |              |             |
|-----------------|-------------|--------------|-------------|--------------|-------------|
| ENSG00000237452 | 133.3879192 | -2.032618541 | 0.541929867 | -3.750704038 | 0.000176339 |
| ENSG00000197062 | 982.9217075 | 1.681537303  | 0.448360198 | 3.750416098  | 0.000176541 |
| ENSG00000127081 | 1023.214484 | 1.805466196  | 0.481634463 | 3.748623353  | 0.000177808 |
| ENSG00000151006 | 113.5137515 | -1.575940241 | 0.420470277 | -3.748041961 | 0.00017822  |
| ENSG00000103111 | 2832.379738 | 1.454547794  | 0.388121668 | 3.747659341  | 0.000178492 |
| ENSG00000174564 | 150.0474636 | 1.553738924  | 0.414748304 | 3.746221285  | 0.000179518 |
| ENSG00000260488 | 14.99314882 | 5.429846906  | 1.449509785 | 3.745988444  | 0.000179685 |
| ENSG00000260852 | 571.4969588 | 2.164484635  | 0.578101307 | 3.744126869  | 0.000181022 |
| ENSG00000142867 | 1882.584279 | 0.977991984  | 0.261336408 | 3.742272235  | 0.000182364 |
| ENSG00000132768 | 1166.312102 | -1.341698541 | 0.358528255 | -3.74223934  | 0.000182388 |
| ENSG00000179454 | 1203.31891  | 1.277583402  | 0.341411218 | 3.74206627   | 0.000182513 |
| ENSG00000237015 | 103.2925167 | 2.646443198  | 0.707496527 | 3.740574118  | 0.0001836   |
| ENSG00000164051 | 761.4940316 | -1.547239914 | 0.413646143 | -3.740491578 | 0.000183661 |
| ENSG00000163993 | 19.84910796 | 3.033904557  | 0.81115533  | 3.740226372  | 0.000183855 |
| ENSG00000174177 | 1214.963371 | -1.463610647 | 0.391835228 | -3.735270699 | 0.000187513 |
| ENSG00000115896 | 11.25803349 | 4.6070794    | 1.233817353 | 3.734004381  | 0.000188459 |
| ENSG00000144834 | 36.21615869 | 2.814611279  | 0.753832741 | 3.733734454  | 0.000188661 |
| ENSG00000107372 | 12000.7513  | 1.474264593  | 0.394950775 | 3.732780604  | 0.000189378 |
| ENSG00000156136 | 1123.648354 | -1.594112555 | 0.427108163 | -3.732339238 | 0.00018971  |
| ENSG00000138668 | 9682.262735 | -1.592389286 | 0.426874118 | -3.730348642 | 0.000191215 |
| ENSG00000198829 | 93.74879371 | 2.474061162  | 0.663251678 | 3.730199625  | 0.000191328 |
| ENSG00000188971 | 3308.835876 | 1.355460397  | 0.363511504 | 3.728796432  | 0.000192396 |
| ENSG00000135111 | 1022.935861 | 1.418782168  | 0.380529759 | 3.728439457  | 0.000192669 |
| ENSG00000051825 | 1313.660391 | -1.340458244 | 0.35953217  | -3.728340198 | 0.000192745 |
| ENSG00000168003 | 18926.53792 | 1.661620988  | 0.445739612 | 3.727783991  | 0.000193171 |
| ENSG00000142961 | 624.5492229 | 1.070471751  | 0.287209569 | 3.727145147  | 0.000193661 |
| ENSG00000182325 | 1025.66677  | -1.341854094 | 0.36009126  | -3.726427837 | 0.000194213 |
| ENSG00000158691 | 163.113658  | 1.467357323  | 0.393844863 | 3.725724165  | 0.000194755 |
| ENSG00000145817 | 2871.475006 | 1.227896168  | 0.329575705 | 3.72568775   | 0.000194783 |
| ENSG00000136052 | 1036.299877 | 1.401937796  | 0.376291038 | 3.725674154  | 0.000194794 |
| ENSG00000169683 | 929.2137333 | -2.427548706 | 0.651863717 | -3.724012617 | 0.000196081 |
| ENSG00000102393 | 4101.571074 | 2.562457806  | 0.688310843 | 3.722820631  | 0.000197009 |
| ENSG00000214050 | 388.6996966 | 1.178678189  | 0.316663796 | 3.722175391  | 0.000197514 |
| ENSG00000140557 | 18.31271172 | 4.124409746  | 1.108904425 | 3.719355476  | 0.000199732 |
| ENSG00000024862 | 417.17147   | 1.136176358  | 0.305593775 | 3.717930307  | 0.000200862 |
| ENSG00000120519 | 613.2667808 | 1.381477841  | 0.371750901 | 3.716138512  | 0.000202291 |
| ENSG00000178752 | 325.9197283 | -1.507986465 | 0.405812736 | -3.715966336 | 0.000202429 |
| ENSG00000136270 | 2846.294731 | -1.150133585 | 0.309514626 | -3.715926447 | 0.00020246  |
| ENSG00000203709 | 222.8889292 | 2.812428513  | 0.756919915 | 3.715622297  | 0.000202704 |
| ENSG00000168061 | 570.733182  | -1.599733394 | 0.430594569 | -3.715173176 | 0.000203065 |
| ENSG00000166173 | 1663.442619 | 0.961320513  | 0.258813291 | 3.714339822  | 0.000203735 |
| ENSG00000111897 | 5138.785594 | 1.238743875  | 0.333530129 | 3.714038904  | 0.000203977 |
| ENSG00000265511 | 19.75441981 | -3.477532815 | 0.936921599 | -3.711658283 | 0.000205906 |
| ENSG00000109944 | 491.2336345 | 1.338431595  | 0.360660997 | 3.711051673  | 0.0002064   |
| ENSG00000245149 | 171.2045917 | 1.575116227  | 0.424642694 | 3.70927429   | 0.000207854 |
| ENSG00000141140 | 3116.475525 | -1.650847612 | 0.445238174 | -3.707785425 | 0.00020908  |
| ENSG00000072501 | 4349.559493 | -1.28815514  | 0.347438336 | -3.707579182 | 0.00020925  |

|                 |             |              |             |              |             |
|-----------------|-------------|--------------|-------------|--------------|-------------|
| ENSG00000129282 | 255.3577715 | -2.271678434 | 0.613217894 | -3.704520786 | 0.000211791 |
| ENSG00000183087 | 1711.340454 | -0.952255204 | 0.257142769 | -3.703215959 | 0.000212884 |
| ENSG00000142700 | 14.98526669 | 4.440597659  | 1.19937163  | 3.7024368    | 0.000213539 |
| ENSG00000144120 | 630.1292261 | -1.193512348 | 0.322466947 | -3.701192815 | 0.000214588 |
| ENSG00000112715 | 5278.811655 | 1.050543003  | 0.284072503 | 3.69815097   | 0.000217176 |
| ENSG00000106052 | 7445.769756 | 1.345386418  | 0.364000355 | 3.696112924  | 0.000218926 |
| ENSG00000177646 | 1469.408169 | -1.043323064 | 0.28247478  | -3.693508722 | 0.000221181 |
| ENSG00000102554 | 3707.67643  | 1.018009889  | 0.275703055 | 3.692414257  | 0.000222135 |
| ENSG00000131746 | 2425.136359 | -2.005864024 | 0.543328093 | -3.691809885 | 0.000222664 |
| ENSG00000271590 | 29.08982146 | 2.730216959  | 0.739560216 | 3.691676349  | 0.000222781 |
| ENSG00000117411 | 1942.350363 | -1.531005439 | 0.414719329 | -3.691666465 | 0.00022279  |
| ENSG00000160117 | 466.9537383 | -1.419486008 | 0.384519183 | -3.691586973 | 0.000222859 |
| ENSG00000161618 | 632.2282771 | -1.215100013 | 0.329211416 | -3.690941308 | 0.000223426 |
| ENSG00000196152 | 322.0794524 | 1.376633758  | 0.373072197 | 3.689992897  | 0.00022426  |
| ENSG00000182687 | 25.72525145 | 3.344483952  | 0.906473815 | 3.689553847  | 0.000224648 |
| ENSG00000174125 | 139.563934  | 1.668775959  | 0.452437452 | 3.688412513  | 0.000225658 |
| ENSG00000067167 | 8408.378514 | 1.005967899  | 0.272754662 | 3.688178567  | 0.000225865 |
| ENSG00000081237 | 13.90899411 | 5.404665764  | 1.465472612 | 3.688001892  | 0.000226022 |
| ENSG00000166582 | 933.8767936 | -1.268953399 | 0.344148031 | -3.687231324 | 0.000226707 |
| ENSG00000173621 | 767.9316439 | -1.459630777 | 0.395949486 | -3.686406544 | 0.000227443 |
| ENSG00000100739 | 8.400549529 | 5.56111573   | 1.508860874 | 3.685638501  | 0.00022813  |
| ENSG00000100485 | 1543.678654 | 1.189663877  | 0.32284486  | 3.684939809  | 0.000228757 |
| ENSG00000145390 | 3591.765434 | 1.240513849  | 0.336865196 | 3.682523054  | 0.000230937 |
| ENSG00000172889 | 1294.10575  | -1.819786679 | 0.494360564 | -3.681091924 | 0.000232237 |
| ENSG00000053372 | 2551.56183  | -1.238239031 | 0.336649601 | -3.678124161 | 0.000234956 |
| ENSG00000144677 | 1326.37958  | -1.112157113 | 0.302399278 | -3.677777008 | 0.000235276 |
| ENSG00000185480 | 459.6560167 | -1.667615609 | 0.453445909 | -3.677650579 | 0.000235392 |
| ENSG00000106268 | 351.8640906 | -1.945799188 | 0.529676969 | -3.673558231 | 0.000239196 |
| ENSG00000164687 | 2553.00176  | -1.374803604 | 0.374266077 | -3.673332129 | 0.000239408 |
| ENSG00000089101 | 24.88413763 | 2.312909076  | 0.62965552  | 3.673292778  | 0.000239445 |
| ENSG00000101977 | 30.20780788 | 2.729758416  | 0.743522497 | 3.671386441  | 0.000241238 |
| ENSG00000102385 | 49.26959698 | -2.093084797 | 0.57036775  | -3.669710981 | 0.000242825 |
| ENSG00000106105 | 16639.26691 | 1.359247434  | 0.370590379 | 3.66778932   | 0.000244657 |
| ENSG00000169946 | 251.0190341 | 1.877855422  | 0.512278623 | 3.665691555  | 0.000246671 |
| ENSG00000174130 | 453.4726197 | 1.303099925  | 0.355649943 | 3.663995874  | 0.000248311 |
| ENSG00000165271 | 1696.890428 | -1.062496212 | 0.290205676 | -3.661183423 | 0.000251053 |
| ENSG00000108551 | 39.95485753 | 2.503619573  | 0.684282332 | 3.658752326  | 0.000253446 |
| ENSG00000169155 | 2576.231433 | 1.652614355  | 0.451833531 | 3.657573511  | 0.000254614 |
| ENSG00000072682 | 3217.237493 | 1.35276457   | 0.370206611 | 3.654079986  | 0.000258106 |
| ENSG00000001461 | 2013.580501 | 1.486082561  | 0.406879476 | 3.652390082  | 0.000259811 |
| ENSG00000138356 | 42.17328067 | 2.901165208  | 0.794456633 | 3.651760319  | 0.000260449 |
| ENSG00000160447 | 1783.749775 | -1.276040976 | 0.349576106 | -3.650252275 | 0.000261983 |
| ENSG00000099617 | 396.8195863 | -1.20647464  | 0.330784823 | -3.647309541 | 0.000265001 |
| ENSG00000196155 | 1440.653344 | -1.140099403 | 0.312596806 | -3.647188267 | 0.000265126 |
| ENSG00000136021 | 4428.404309 | 1.239901435  | 0.340206348 | 3.644557024  | 0.000267853 |
| ENSG00000140905 | 506.426475  | -1.94624808  | 0.534514468 | -3.641151353 | 0.000271422 |
| ENSG00000184459 | 12.0144644  | 6.080541942  | 1.670315077 | 3.640356256  | 0.000272261 |

|                 |             |              |             |              |             |
|-----------------|-------------|--------------|-------------|--------------|-------------|
| ENSG00000167393 | 153.9154172 | -1.551498362 | 0.426230858 | -3.640042323 | 0.000272593 |
| ENSG00000130520 | 5260.928576 | -1.310474073 | 0.360046818 | -3.639732415 | 0.000272922 |
| ENSG00000160752 | 2102.229433 | -1.174589829 | 0.32283781  | -3.638327951 | 0.000274414 |
| ENSG00000177943 | 225.7433744 | -1.572479512 | 0.432574526 | -3.635164388 | 0.000277803 |
| ENSG00000100664 | 17971.28448 | 1.519515028  | 0.418108094 | 3.6342636    | 0.000278776 |
| ENSG00000221926 | 1188.951152 | 1.041876979  | 0.286822281 | 3.632482714  | 0.000280707 |
| ENSG00000232692 | 19.88376272 | 2.741410765  | 0.755409935 | 3.629037213  | 0.00028448  |
| ENSG00000229656 | 40.04514003 | 3.507181477  | 0.966917603 | 3.627177192  | 0.000286537 |
| ENSG00000107833 | 2804.210274 | -1.800560469 | 0.496523828 | -3.626332449 | 0.000287475 |
| ENSG00000147955 | 2758.930651 | -1.673623248 | 0.461558686 | -3.62602481  | 0.000287818 |
| ENSG00000120742 | 7945.317329 | 1.205088351  | 0.332408427 | 3.625324311  | 0.000288599 |
| ENSG00000037897 | 488.1167553 | -1.435122656 | 0.395932801 | -3.624662199 | 0.000289339 |
| ENSG00000169826 | 1880.776233 | 1.294011272  | 0.357184894 | 3.622805147  | 0.000291425 |
| ENSG00000110092 | 18080.15727 | -1.751120497 | 0.483394982 | -3.622545876 | 0.000291718 |
| ENSG00000101844 | 1230.780292 | 1.828416581  | 0.505006934 | 3.620577179  | 0.000293947 |
| ENSG00000174652 | 1003.256449 | 1.546015521  | 0.427097161 | 3.619821584  | 0.000294806 |
| ENSG00000112759 | 2425.596619 | -1.914868277 | 0.529214884 | -3.618319016 | 0.000296523 |
| ENSG00000137812 | 2185.498856 | -1.872155539 | 0.517435967 | -3.618139552 | 0.000296728 |
| ENSG00000168994 | 904.0653973 | 1.549183327  | 0.428191294 | 3.617970162  | 0.000296923 |
| ENSG00000007944 | 1358.33509  | 1.34785789   | 0.372602134 | 3.617418604  | 0.000297556 |
| ENSG00000137261 | 292.4954416 | 1.839248465  | 0.50850993  | 3.616937166  | 0.00029811  |
| ENSG00000235643 | 17.73882687 | 4.124641943  | 1.140377087 | 3.616910572  | 0.00029814  |
| ENSG00000167562 | 281.6316187 | 1.720867609  | 0.475785942 | 3.616894612  | 0.000298159 |
| ENSG00000125998 | 17.28499953 | 3.488585998  | 0.964918937 | 3.615418729  | 0.000299863 |
| ENSG00000196363 | 2668.690303 | -1.2573695   | 0.347835022 | -3.614844455 | 0.000300528 |
| ENSG00000148516 | 598.0971177 | 1.997247354  | 0.552595051 | 3.614305537  | 0.000301154 |
| ENSG00000167792 | 3497.80811  | -1.34683259  | 0.372665355 | -3.614053662 | 0.000301447 |
| ENSG00000105953 | 3405.916852 | -1.173725941 | 0.324858526 | -3.613037205 | 0.000302631 |
| ENSG00000225678 | 6.551404623 | 6.188392372  | 1.713072467 | 3.612452183  | 0.000303315 |
| ENSG00000271643 | 55.24780631 | 1.909807669  | 0.528851227 | 3.611238041  | 0.000304739 |
| ENSG00000223380 | 4092.09937  | 1.425503755  | 0.394830502 | 3.610419525  | 0.000305702 |
| ENSG00000241839 | 1111.24422  | 1.579187404  | 0.437538229 | 3.609255828  | 0.000307077 |
| ENSG00000132199 | 1216.188253 | -1.499539538 | 0.41549383  | -3.609053688 | 0.000307316 |
| ENSG00000156802 | 6194.277024 | -1.584162535 | 0.439441026 | -3.60494911  | 0.000312214 |
| ENSG00000158717 | 798.607459  | -1.142682507 | 0.316988383 | -3.604808779 | 0.000312383 |
| ENSG00000003436 | 1434.640431 | 1.702091356  | 0.472173471 | 3.604800903  | 0.000312392 |
| ENSG00000132692 | 378.0334646 | 1.413717857  | 0.392220578 | 3.604394919  | 0.000312881 |
| ENSG00000196642 | 2291.994717 | -1.238603505 | 0.343645403 | -3.604306925 | 0.000312987 |
| ENSG00000112029 | 1175.603428 | -1.800101135 | 0.499448912 | -3.604174702 | 0.000313146 |
| ENSG00000160888 | 4291.05861  | 1.065576467  | 0.295697314 | 3.603605495  | 0.000313833 |
| ENSG00000244567 | 225.6341666 | 1.771678951  | 0.491647221 | 3.603557335  | 0.000313891 |
| ENSG00000248835 | 240.2632828 | -1.841861444 | 0.511226371 | -3.602829484 | 0.000314772 |
| ENSG00000074071 | 2541.941424 | -1.505717076 | 0.417943947 | -3.602677078 | 0.000314957 |
| ENSG00000111799 | 3392.637581 | -1.040425892 | 0.288802531 | -3.602551156 | 0.000315109 |
| ENSG00000170185 | 3585.976879 | 1.776455995  | 0.493146164 | 3.602291011  | 0.000315425 |
| ENSG00000069275 | 7457.152433 | -1.435493652 | 0.398527536 | -3.601993644 | 0.000315786 |
| ENSG00000129514 | 236.0306703 | 1.806238747  | 0.501576037 | 3.601126477  | 0.000316841 |

|                 |             |              |             |              |             |
|-----------------|-------------|--------------|-------------|--------------|-------------|
| ENSG00000186104 | 1028.720363 | 1.040950991  | 0.289091851 | 3.600762132  | 0.000317286 |
| ENSG00000204789 | 1209.152019 | 1.040515535  | 0.288983295 | 3.600607901  | 0.000317474 |
| ENSG00000172927 | 3406.608677 | -1.768871565 | 0.491323646 | -3.600216637 | 0.000317952 |
| ENSG00000136122 | 712.4631865 | -1.669827484 | 0.464127174 | -3.597780043 | 0.000320945 |
| ENSG00000027001 | 704.9190228 | -1.980406794 | 0.550567939 | -3.59702528  | 0.000321877 |
| ENSG00000002919 | 1696.652811 | 1.540226301  | 0.428250838 | 3.596551749  | 0.000322463 |
| ENSG00000156671 | 3831.997569 | 1.066784344  | 0.296738994 | 3.595025818  | 0.000324359 |
| ENSG00000169972 | 516.5167756 | -1.354228336 | 0.376772974 | -3.594282051 | 0.000325287 |
| ENSG00000154144 | 1886.253725 | 1.06871484   | 0.297395627 | 3.593579537  | 0.000326166 |
| ENSG00000181690 | 190.3034954 | 1.279696603  | 0.356217941 | 3.592454101  | 0.000327578 |
| ENSG00000130783 | 226.6829144 | 1.295168864  | 0.360934769 | 3.588373789  | 0.000332747 |
| ENSG00000148339 | 1445.844221 | 1.052849044  | 0.293478783 | 3.587479243  | 0.000333389 |
| ENSG00000197417 | 123.5658025 | -1.368518391 | 0.381518955 | -3.587025947 | 0.000334471 |
| ENSG00000204856 | 318.4187245 | -1.620048316 | 0.45165774  | -3.58689373  | 0.000334641 |
| ENSG00000174010 | 1852.52426  | 1.238591644  | 0.345351424 | 3.586467461  | 0.000335188 |
| ENSG00000183625 | 21.66622703 | 3.619205138  | 1.009164786 | 3.586337126  | 0.000335355 |
| ENSG00000138669 | 117.178483  | 1.444048247  | 0.402866389 | 3.584434658  | 0.000337809 |
| ENSG00000179603 | 33.43031122 | 3.462634267  | 0.966151299 | 3.58394619   | 0.000338442 |
| ENSG00000179119 | 3158.000296 | 1.369453189  | 0.382197872 | 3.583099987  | 0.000339541 |
| ENSG00000111716 | 28081.96043 | -1.099920859 | 0.306981838 | -3.583016068 | 0.00033965  |
| ENSG00000119737 | 226.0663724 | 2.061849763  | 0.575897214 | 3.580239171  | 0.00034328  |
| ENSG00000260144 | 11.12754932 | 5.094230372  | 1.42289383  | 3.580190077  | 0.000343344 |
| ENSG00000182177 | 36.45749355 | 2.985263733  | 0.833992389 | 3.579485586  | 0.000344271 |
| ENSG00000109881 | 390.70119   | -1.559344652 | 0.43582461  | -3.577917852 | 0.000346342 |
| ENSG00000229320 | 179.0021878 | 2.080190965  | 0.581401934 | 3.577887934  | 0.000346382 |
| ENSG00000187961 | 1215.773198 | -1.258152325 | 0.351796342 | -3.576365565 | 0.000348404 |
| ENSG00000197914 | 11.99837019 | 5.290861195  | 1.47949804  | 3.576119096  | 0.000348733 |
| ENSG00000172771 | 111.8664045 | 2.087795097  | 0.583966316 | 3.575197812  | 0.000349963 |
| ENSG00000160753 | 1603.258926 | -1.343543571 | 0.375851898 | -3.574662199 | 0.00035068  |
| ENSG00000122042 | 1611.955834 | 1.157737369  | 0.324035944 | 3.572867117  | 0.000353094 |
| ENSG00000257354 | 11.25583863 | 3.435695016  | 0.961887135 | 3.5718276    | 0.000354499 |
| ENSG00000143322 | 6390.282242 | 1.771926322  | 0.496136047 | 3.571452495  | 0.000355007 |
| ENSG00000262814 | 564.8419002 | -1.31133558  | 0.367192226 | -3.571250933 | 0.00035528  |
| ENSG00000254237 | 15.08711995 | 6.410630455  | 1.797000265 | 3.567406516  | 0.000360532 |
| ENSG00000132182 | 4120.262473 | -1.903749377 | 0.533761674 | -3.566665558 | 0.000361552 |
| ENSG00000205084 | 292.0209298 | -1.44127176  | 0.404332376 | -3.564571733 | 0.000364451 |
| ENSG00000176407 | 5591.949615 | 1.380974476  | 0.387730879 | 3.561682987  | 0.000368485 |
| ENSG00000184343 | 31.13514661 | -2.725520718 | 0.765552731 | -3.560199849 | 0.000370573 |
| ENSG00000179520 | 11.97485056 | 6.076593829  | 1.707365302 | 3.559047277  | 0.000372203 |
| ENSG00000197714 | 544.5717629 | 1.655167076  | 0.46517058  | 3.558193803  | 0.000373414 |
| ENSG00000086619 | 1252.351724 | 1.077851209  | 0.303016737 | 3.557068233  | 0.000375017 |
| ENSG00000075131 | 630.8443326 | -1.578549641 | 0.443848829 | -3.556502885 | 0.000375824 |
| ENSG00000268262 | 23.21956836 | -2.252845816 | 0.633460486 | -3.556410961 | 0.000375956 |
| ENSG00000272486 | 117.8661647 | 1.902759924  | 0.535206063 | 3.555191274  | 0.000377704 |
| ENSG00000198839 | 1467.680538 | 1.026418162  | 0.288799602 | 3.554084412  | 0.000379297 |
| ENSG00000269821 | 619.0371336 | 1.921803738  | 0.540840294 | 3.553366419  | 0.000380334 |
| ENSG00000112308 | 13999.79723 | 1.368627125  | 0.385348315 | 3.551662409  | 0.000382806 |

|                 |             |              |             |              |             |
|-----------------|-------------|--------------|-------------|--------------|-------------|
| ENSG00000184984 | 8.495961517 | 5.562682182  | 1.56643674  | 3.551169376  | 0.000383524 |
| ENSG00000238271 | 36.53364929 | 3.513545554  | 0.989446681 | 3.551020609  | 0.00038374  |
| ENSG00000100711 | 1097.101096 | -1.26696492  | 0.356902038 | -3.549895445 | 0.000385384 |
| ENSG00000225975 | 16.89971967 | 3.706336006  | 1.044243566 | 3.549302217  | 0.000386254 |
| ENSG00000144566 | 3603.162987 | 1.105997771  | 0.311658298 | 3.548751238  | 0.000387063 |
| ENSG00000229956 | 19.09388676 | 3.364487512  | 0.948280323 | 3.547988323  | 0.000388185 |
| ENSG00000228393 | 50.58068328 | 2.267915601  | 0.639342103 | 3.547264589  | 0.000389253 |
| ENSG00000138433 | 1032.653881 | 1.18048974   | 0.332807353 | 3.547066279  | 0.000389547 |
| ENSG00000206344 | 132.7355566 | 2.532139855  | 0.713945077 | 3.546687185  | 0.000390107 |
| ENSG00000244405 | 7502.514183 | 1.208465058  | 0.340770612 | 3.546271352  | 0.000390724 |
| ENSG00000168140 | 489.5568173 | 1.435344479  | 0.404771262 | 3.54606321   | 0.000391032 |
| ENSG00000173110 | 10.47041123 | 4.980480602  | 1.406308084 | 3.541528815  | 0.000397815 |
| ENSG00000104368 | 522.4605036 | -1.65015033  | 0.466065147 | -3.540600147 | 0.000399218 |
| ENSG00000153575 | 869.0858541 | -1.421684774 | 0.401809533 | -3.538205683 | 0.000402856 |
| ENSG00000107165 | 26.83456792 | 2.844410029  | 0.804971461 | 3.53355388   | 0.000410013 |
| ENSG00000182742 | 329.7081322 | -1.487329667 | 0.421057664 | -3.53236574  | 0.000411859 |
| ENSG00000180900 | 4564.691491 | -1.491183641 | 0.422158654 | -3.532282538 | 0.000411989 |
| ENSG00000093009 | 914.0430726 | -1.993185492 | 0.564298003 | -3.532150532 | 0.000412195 |
| ENSG00000137414 | 2686.806544 | 1.098810265  | 0.31119134  | 3.530979579  | 0.000414024 |
| ENSG00000036054 | 2231.964394 | 1.40097453   | 0.396841333 | 3.530314038  | 0.000415067 |
| ENSG00000125037 | 1224.504156 | 1.912878044  | 0.5418838   | 3.530052098  | 0.000415478 |
| ENSG00000160908 | 1179.018438 | 1.44951594   | 0.410623966 | 3.530032486  | 0.000415509 |
| ENSG00000197771 | 6587.869603 | -1.273858211 | 0.360959547 | -3.52908857  | 0.000416994 |
| ENSG00000185163 | 1252.416741 | -1.06218291  | 0.301043245 | -3.528339955 | 0.000418175 |
| ENSG00000214279 | 154.9399382 | -1.793123226 | 0.508241419 | -3.528093457 | 0.000418564 |
| ENSG00000160208 | 3670.915313 | -1.138493363 | 0.32273765  | -3.527612486 | 0.000419326 |
| ENSG00000256060 | 242.5060367 | 2.027778865  | 0.574875163 | 3.527337753  | 0.000419761 |
| ENSG00000167723 | 314.7486378 | 1.699987789  | 0.482368799 | 3.524249065  | 0.000424685 |
| ENSG00000110002 | 856.4517273 | 1.667274884  | 0.473122769 | 3.523979384  | 0.000425117 |
| ENSG00000101361 | 7555.032561 | -0.968444429 | 0.274822452 | -3.523891227 | 0.000425259 |
| ENSG00000272512 | 77.61537729 | -1.478705591 | 0.419673578 | -3.52346602  | 0.000425942 |
| ENSG00000155744 | 1596.374389 | 1.732596022  | 0.491858543 | 3.522549414  | 0.000427417 |
| ENSG00000273271 | 83.09803474 | 2.096470003  | 0.595378873 | 3.521236808  | 0.000429539 |
| ENSG00000138796 | 921.8579365 | -1.655324518 | 0.470302258 | -3.519703528 | 0.000432029 |
| ENSG00000165943 | 1203.716053 | 1.214885569  | 0.345551126 | 3.515791091  | 0.000438446 |
| ENSG00000115641 | 3661.23212  | 0.884620958  | 0.251745648 | 3.513947372  | 0.0004415   |
| ENSG00000128272 | 27395.09862 | 1.158001394  | 0.329583234 | 3.513532475  | 0.00044219  |
| ENSG00000183779 | 590.4629875 | 1.550265871  | 0.441249809 | 3.513351934  | 0.000442491 |
| ENSG00000199177 | 35.5951561  | 8.631211772  | 2.457329776 | 3.512435269  | 0.00044402  |
| ENSG00000247400 | 101.3107794 | 1.446483855  | 0.411822636 | 3.512395217  | 0.000444087 |
| ENSG00000185056 | 14.60379282 | 6.36744933   | 1.813307153 | 3.511511726  | 0.000445566 |
| ENSG00000199024 | 8.128899358 | 6.495558898  | 1.849822274 | 3.511450256  | 0.000445669 |
| ENSG00000108561 | 10181.51555 | -1.15551003  | 0.329131536 | -3.510784911 | 0.000446786 |
| ENSG00000132329 | 419.0014075 | -1.074845169 | 0.30617428  | -3.510566492 | 0.000447153 |
| ENSG00000196295 | 770.1660727 | 1.140100788  | 0.324766322 | 3.51052653   | 0.00044722  |
| ENSG00000163507 | 1317.722934 | -1.719109805 | 0.48982397  | -3.509648181 | 0.0004487   |
| ENSG00000116731 | 1849.085812 | 1.762759837  | 0.502261642 | 3.509644558  | 0.000448706 |

|                 |             |              |             |              |             |
|-----------------|-------------|--------------|-------------|--------------|-------------|
| ENSG00000232273 | 13.95870664 | 3.965510115  | 1.130017567 | 3.509246431  | 0.000449378 |
| ENSG00000167011 | 117.4593703 | -1.701515717 | 0.485134462 | -3.507307457 | 0.000452666 |
| ENSG00000197860 | 1870.677978 | 0.898028164  | 0.25606289  | 3.507060951  | 0.000453085 |
| ENSG00000163762 | 57.77561389 | -1.788222295 | 0.509956124 | -3.506619904 | 0.000453837 |
| ENSG00000109572 | 8771.573706 | 1.138183843  | 0.324667456 | 3.505691196  | 0.000455423 |
| ENSG00000140511 | 1083.671702 | 1.552448818  | 0.443229719 | 3.502582862  | 0.00046077  |
| ENSG00000206573 | 686.6975955 | 2.017466255  | 0.575999951 | 3.502545878  | 0.000460834 |
| ENSG00000160223 | 566.3857145 | -1.403045957 | 0.400611545 | -3.502260413 | 0.000461328 |
| ENSG00000118496 | 2945.998695 | 1.623483571  | 0.463664644 | 3.501417654  | 0.00046279  |
| ENSG00000125871 | 1202.908668 | -1.259036985 | 0.359596242 | -3.501251784 | 0.000463078 |
| ENSG00000224032 | 1176.918381 | 1.068636971  | 0.305311051 | 3.500158176  | 0.000464982 |
| ENSG00000136943 | 558.8328099 | -1.199336693 | 0.342841161 | -3.498228416 | 0.00046836  |
| ENSG00000205918 | 91.2023956  | 1.723914195  | 0.492987741 | 3.49687031   | 0.000470751 |
| ENSG00000115963 | 1250.484709 | 0.969749787  | 0.277414521 | 3.495670609  | 0.000472872 |
| ENSG00000236675 | 121.4875368 | 2.144528382  | 0.613559973 | 3.495222106  | 0.000473667 |
| ENSG00000188554 | 7373.342817 | 1.080594966  | 0.30917578  | 3.495082849  | 0.000473915 |
| ENSG00000186162 | 336.8759669 | 1.725976855  | 0.494025597 | 3.493699245  | 0.000476377 |
| ENSG00000260804 | 359.314467  | -1.164688439 | 0.333446994 | -3.492874309 | 0.000477851 |
| ENSG00000167088 | 3149.466966 | -1.040828834 | 0.298057947 | -3.492035175 | 0.000479355 |
| ENSG00000167566 | 1760.457798 | 1.492205182  | 0.427346082 | 3.491795634  | 0.000479785 |
| ENSG00000151552 | 864.3633268 | -1.101562329 | 0.315607678 | -3.49029002  | 0.000482497 |
| ENSG00000090013 | 4665.092592 | 1.569658676  | 0.449767782 | 3.489931337  | 0.000483145 |
| ENSG00000272452 | 244.0478785 | -1.275639244 | 0.3659335   | -3.485986506 | 0.000490326 |
| ENSG00000092470 | 1161.838698 | -1.712492169 | 0.491262487 | -3.485900538 | 0.000490483 |
| ENSG00000185697 | 784.4402289 | -1.603829331 | 0.460163294 | -3.485348252 | 0.000491497 |
| ENSG00000171241 | 1561.878385 | -1.879399122 | 0.539431275 | -3.484038113 | 0.000493909 |
| ENSG00000178295 | 897.1048952 | -1.457374977 | 0.41833848  | -3.483722029 | 0.000494493 |
| ENSG00000116044 | 6047.252462 | 0.867747421  | 0.249167947 | 3.482580456  | 0.000496606 |
| ENSG00000188283 | 395.8332961 | 1.292399479  | 0.371202158 | 3.481659394  | 0.000498317 |
| ENSG00000121903 | 748.1618517 | 1.431122584  | 0.411099232 | 3.481209579  | 0.000499155 |
| ENSG00000135316 | 11010.4359  | -1.152736659 | 0.331131127 | -3.481209002 | 0.000499156 |
| ENSG00000151849 | 1045.328115 | -1.221805156 | 0.351016385 | -3.480763888 | 0.000499986 |
| ENSG00000220023 | 654.810896  | 1.111385806  | 0.319352886 | 3.480118248  | 0.000501193 |
| ENSG00000101911 | 1780.982635 | -1.539976553 | 0.442630871 | -3.479144029 | 0.000503018 |
| ENSG00000161638 | 4538.146413 | 1.079220542  | 0.310343125 | 3.477507489  | 0.000506099 |
| ENSG00000160072 | 1675.840571 | -0.895558061 | 0.257574715 | -3.476886541 | 0.000507272 |
| ENSG00000224616 | 30.02779582 | 2.69797363   | 0.776073715 | 3.476439903  | 0.000508118 |
| ENSG00000112305 | 76.32932196 | 1.508514897  | 0.434006596 | 3.475787947  | 0.000509355 |
| ENSG00000267023 | 2144.27094  | 1.50956933   | 0.434341395 | 3.475536399  | 0.000509833 |
| ENSG00000152380 | 94.91770496 | 1.791645995  | 0.515525024 | 3.475381239  | 0.000510128 |
| ENSG00000073670 | 365.4885481 | -2.039614415 | 0.587015814 | -3.474547644 | 0.000511715 |
| ENSG00000145882 | 710.7332362 | -1.22402368  | 0.35235988  | -3.473788449 | 0.000513165 |
| ENSG00000176896 | 85.33526813 | 1.48704276   | 0.42809206  | 3.473651809  | 0.000513427 |
| ENSG00000196517 | 527.8679859 | 1.159658061  | 0.333973281 | 3.472307895  | 0.000516004 |
| ENSG00000198862 | 1685.254871 | 1.428384049  | 0.411370721 | 3.472255015  | 0.000516106 |
| ENSG00000204929 | 11.96529517 | 4.506480285  | 1.298050118 | 3.471730578  | 0.000517115 |
| ENSG00000102524 | 63.88011494 | 2.147472523  | 0.618594727 | 3.471533829  | 0.000517494 |

|                 |             |              |             |              |             |
|-----------------|-------------|--------------|-------------|--------------|-------------|
| ENSG00000261556 | 109.2274756 | 1.546266482  | 0.445575524 | 3.470267996  | 0.000519939 |
| ENSG00000101945 | 391.7252013 | -2.164557141 | 0.623769566 | -3.470123039 | 0.00052022  |
| ENSG00000170515 | 6083.302307 | -1.270221187 | 0.366050759 | -3.470068445 | 0.000520326 |
| ENSG00000160214 | 1439.794435 | -0.984414044 | 0.283701111 | -3.469898448 | 0.000520655 |
| ENSG00000251015 | 7.327395975 | 5.350203831  | 1.542537622 | 3.468443009  | 0.000523484 |
| ENSG00000140350 | 5529.464484 | -1.23017796  | 0.354733681 | -3.467891624 | 0.000524559 |
| ENSG00000226314 | 111.6857294 | 1.59712068   | 0.460613659 | 3.467375854  | 0.000525566 |
| ENSG00000154642 | 1677.019699 | 1.19212552   | 0.34386006  | 3.4668915    | 0.000526514 |
| ENSG00000125944 | 8191.50637  | -0.963004494 | 0.277818989 | -3.466301914 | 0.00052767  |
| ENSG00000119403 | 1073.030348 | -1.801602064 | 0.519794038 | -3.465992166 | 0.000528279 |
| ENSG00000159082 | 1493.900698 | 1.843447988  | 0.531927289 | 3.465601456  | 0.000529047 |
| ENSG00000198700 | 4414.173488 | -0.964854672 | 0.278410396 | -3.465584207 | 0.000529081 |
| ENSG00000179598 | 309.0953994 | -1.520060361 | 0.438689924 | -3.464999486 | 0.000530232 |
| ENSG00000272275 | 94.16038952 | 1.57418173   | 0.454602376 | 3.462766171  | 0.000534653 |
| ENSG00000111816 | 704.7816644 | 1.595636094  | 0.460814622 | 3.462642067  | 0.000534899 |
| ENSG00000013306 | 7103.475551 | -1.141667117 | 0.32972232  | -3.462510874 | 0.00053516  |
| ENSG00000158560 | 74.96134165 | 2.980136452  | 0.860880788 | 3.461729538  | 0.000536716 |
| ENSG00000135763 | 981.7422034 | -1.144590228 | 0.330770652 | -3.460374193 | 0.000539425 |
| ENSG00000119397 | 781.3948153 | -1.317074599 | 0.380781445 | -3.458872845 | 0.000542441 |
| ENSG00000130005 | 1257.608806 | -1.659766869 | 0.479906596 | -3.45852064  | 0.000543151 |
| ENSG00000132481 | 1376.229461 | -1.045440177 | 0.302374679 | -3.45743295  | 0.000545348 |
| ENSG00000077514 | 506.7543059 | -1.238479643 | 0.358212119 | -3.457391797 | 0.000545431 |
| ENSG00000139734 | 1090.069027 | -1.686153248 | 0.487704428 | -3.457326101 | 0.000545564 |
| ENSG00000154721 | 46.78358526 | 1.826482561  | 0.528545594 | 3.455676449  | 0.000548914 |
| ENSG00000174844 | 20.8362302  | 2.456248767  | 0.710855581 | 3.45534147   | 0.000549596 |
| ENSG00000198618 | 403.4716943 | -1.444062697 | 0.417971585 | -3.454930309 | 0.000550435 |
| ENSG00000163806 | 70.64223965 | 1.885440462  | 0.545746575 | 3.454791195  | 0.000550719 |
| ENSG00000185950 | 1937.940017 | 0.888805617  | 0.257291202 | 3.454473418  | 0.000551369 |
| ENSG00000218422 | 78.38190528 | -1.911672826 | 0.553397512 | -3.454429746 | 0.000551458 |
| ENSG00000198482 | 732.7288999 | 1.347728618  | 0.390166259 | 3.454241841  | 0.000551842 |
| ENSG00000105856 | 1493.825529 | 1.381800438  | 0.400120831 | 3.453457888  | 0.000553449 |
| ENSG00000246763 | 56.05732978 | 1.809499656  | 0.5244197   | 3.450479942  | 0.000559591 |
| ENSG00000257954 | 39.29936189 | 2.237709592  | 0.648815455 | 3.448915364  | 0.000562843 |
| ENSG00000173085 | 490.7609103 | -1.793161517 | 0.520226025 | -3.446889294 | 0.000567081 |
| ENSG00000060140 | 844.7918525 | 1.698209011  | 0.492979503 | 3.444786243  | 0.000571511 |
| ENSG00000239218 | 46.25587122 | 2.198929058  | 0.638410291 | 3.444382225  | 0.000572366 |
| ENSG00000241945 | 2399.135505 | -1.525736528 | 0.443031391 | -3.443856484 | 0.00057348  |
| ENSG00000100033 | 158.2108926 | -2.262714045 | 0.65718964  | -3.44301539  | 0.000575267 |
| ENSG00000169689 | 1784.498109 | -1.216434124 | 0.353310886 | -3.442956815 | 0.000575391 |
| ENSG00000138778 | 1531.894657 | -1.392448273 | 0.40451586  | -3.442258788 | 0.000576878 |
| ENSG00000161179 | 1020.459521 | -1.515456673 | 0.440510309 | -3.440229754 | 0.000581221 |
| ENSG00000263823 | 14.95992493 | 3.797362351  | 1.103911842 | 3.4399145    | 0.000581898 |
| ENSG00000164061 | 169.7311643 | -1.285512772 | 0.373760741 | -3.439400209 | 0.000583005 |
| ENSG00000148334 | 2549.877418 | -1.14644756  | 0.33332941  | -3.439383168 | 0.000583041 |
| ENSG00000130748 | 347.6070641 | -1.358495273 | 0.395271967 | -3.436862174 | 0.000588495 |
| ENSG00000137124 | 2154.108828 | -1.54929704  | 0.451118451 | -3.434346425 | 0.000593985 |
| ENSG00000072364 | 6688.590613 | 1.233031708  | 0.359070212 | 3.433957114  | 0.000594838 |

|                  |             |              |             |              |             |
|------------------|-------------|--------------|-------------|--------------|-------------|
| ENSG00000013441  | 3417.949768 | 1.277383952  | 0.372035522 | 3.433499963  | 0.000595842 |
| ENSG000000123091 | 5602.824445 | 1.120977698  | 0.326525967 | 3.433043043  | 0.000596847 |
| ENSG000000239672 | 2234.226366 | -1.296719968 | 0.377729364 | -3.432933974 | 0.000597087 |
| ENSG000000197619 | 48.95080347 | 2.085552042  | 0.607516294 | 3.432915403  | 0.000597128 |
| ENSG000000166450 | 11.97318309 | 4.643595177  | 1.352937271 | 3.432232431  | 0.000598634 |
| ENSG000000092203 | 4637.199575 | 1.621575009  | 0.472459193 | 3.432201201  | 0.000598703 |
| ENSG000000160058 | 4826.752811 | 1.574496845  | 0.458836607 | 3.431497883  | 0.000600258 |
| ENSG000000128891 | 707.9098931 | 1.666021009  | 0.485680682 | 3.430280576  | 0.000602957 |
| ENSG000000104856 | 872.5249357 | 1.311211227  | 0.382386267 | 3.429022801  | 0.000605759 |
| ENSG000000087269 | 2473.500389 | -1.240550106 | 0.361814928 | -3.428686908 | 0.000606509 |
| ENSG000000184368 | 39.63860249 | 2.573866408  | 0.750713072 | 3.428562129  | 0.000606788 |
| ENSG000000158748 | 20.07792426 | -3.297331491 | 0.961897776 | -3.427943772 | 0.000608171 |
| ENSG000000226652 | 48.05482871 | 2.9630348    | 0.864399292 | 3.427854265  | 0.000608372 |
| ENSG000000176142 | 2013.540676 | 0.893290744  | 0.260629133 | 3.427440107  | 0.000609301 |
| ENSG000000103978 | 2830.135807 | 1.249288488  | 0.364695425 | 3.425566658  | 0.000613518 |
| ENSG000000165997 | 4653.893609 | 0.920616033  | 0.268828087 | 3.424553004  | 0.000615812 |
| ENSG000000143199 | 33.48749361 | 3.774354452  | 1.102201317 | 3.424378463  | 0.000616207 |
| ENSG000000243667 | 185.7076258 | -1.327547624 | 0.387789204 | -3.423374372 | 0.000618488 |
| ENSG000000270067 | 104.5734154 | 1.611368503  | 0.470811341 | 3.422535446  | 0.0006204   |
| ENSG000000111247 | 556.8562752 | -1.889202835 | 0.552060964 | -3.422090959 | 0.000621415 |
| ENSG000000124588 | 3525.208808 | 1.397753566  | 0.408602829 | 3.420812261  | 0.000624344 |
| ENSG000000164609 | 3824.234941 | 1.208568829  | 0.353299785 | 3.420802612  | 0.000624366 |
| ENSG000000159256 | 2523.219861 | 1.259111621  | 0.36807869  | 3.420767506  | 0.000624447 |
| ENSG000000184106 | 6.042387231 | 6.064662988  | 1.773056741 | 3.420456237  | 0.000625162 |
| ENSG000000130881 | 873.0478447 | -1.121684448 | 0.327955682 | -3.420231783 | 0.000625678 |
| ENSG000000228389 | 104.6046633 | 2.141817487  | 0.626317992 | 3.419696567  | 0.00062691  |
| ENSG000000172167 | 645.7836276 | -1.375020206 | 0.40211902  | -3.419435882 | 0.000627511 |
| ENSG000000105971 | 4651.637304 | -1.478948677 | 0.43274695  | -3.417583132 | 0.000631798 |
| ENSG000000104524 | 321.2885708 | -1.872993375 | 0.548684279 | -3.413608604 | 0.000641086 |
| ENSG000000267681 | 17.82724222 | 2.555880847  | 0.748895476 | 3.412867255  | 0.000642832 |
| ENSG000000065268 | 1601.82807  | -1.093811162 | 0.320539668 | -3.412404991 | 0.000643924 |
| ENSG000000137502 | 616.6646694 | 1.255447221  | 0.368001678 | 3.411525803  | 0.000646004 |
| ENSG000000232600 | 26.60497458 | -2.550096996 | 0.747888532 | -3.409728706 | 0.000650275 |
| ENSG000000172530 | 1354.948912 | 1.592072153  | 0.467017768 | 3.40901838   | 0.000651971 |
| ENSG000000156469 | 1242.460067 | -1.213806636 | 0.356194127 | -3.407710971 | 0.000655102 |
| ENSG000000184992 | 3547.928712 | -1.566683475 | 0.459960156 | -3.406128669 | 0.000658911 |
| ENSG000000100263 | 1744.011092 | 1.872270933  | 0.54971971  | 3.405864658  | 0.000659549 |
| ENSG000000166165 | 10096.52722 | -1.308172489 | 0.38411222  | -3.40570391  | 0.000659937 |
| ENSG000000136159 | 1676.340072 | -1.197499586 | 0.351678158 | -3.405100829 | 0.000661396 |
| ENSG000000224271 | 50.31418697 | 1.570604691  | 0.46131439  | 3.404629743  | 0.000662538 |
| ENSG000000169193 | 645.8946895 | 1.27458007   | 0.374423814 | 3.404110589  | 0.000663799 |
| ENSG000000251136 | 286.4464032 | 1.710937577  | 0.502629131 | 3.403976155  | 0.000664126 |
| ENSG000000269946 | 22.66942031 | 4.020729754  | 1.182692206 | 3.39964171   | 0.000674742 |
| ENSG000000152049 | 8.408289084 | 5.549237385  | 1.632839332 | 3.398520158  | 0.000677515 |
| ENSG000000129810 | 343.6139087 | -1.681297378 | 0.494816287 | -3.397821418 | 0.000679247 |
| ENSG000000163913 | 561.4806626 | -1.218901981 | 0.358793913 | -3.397220348 | 0.000680741 |
| ENSG000000143457 | 2024.837656 | 1.089218803  | 0.320738163 | 3.395975065  | 0.000683846 |



|                 |             |              |             |              |             |
|-----------------|-------------|--------------|-------------|--------------|-------------|
| ENSG00000140105 | 7385.394067 | 1.481994362  | 0.436401175 | 3.395944944  | 0.000683921 |
| ENSG00000069020 | 308.4757737 | 1.215010316  | 0.35780181  | 3.395763465  | 0.000684375 |
| ENSG00000155755 | 704.9956671 | -1.449511675 | 0.426950183 | -3.395037014 | 0.000686193 |
| ENSG00000123416 | 9057.081532 | -1.867389414 | 0.550040843 | -3.395001366 | 0.000686283 |
| ENSG00000132429 | 914.3647416 | 1.360583392  | 0.400804696 | 3.39462937   | 0.000687216 |
| ENSG00000226887 | 597.94755   | -1.771743566 | 0.521984474 | -3.394245718 | 0.000688179 |
| ENSG00000171960 | 1605.544079 | -1.57767097  | 0.464896652 | -3.393595034 | 0.000689816 |
| ENSG00000197746 | 39727.14669 | 1.324636028  | 0.390429855 | 3.39276316   | 0.000691914 |
| ENSG00000181016 | 321.9334834 | 2.461496769  | 0.72560006  | 3.392360206  | 0.000692933 |
| ENSG00000271329 | 5.103413379 | 5.825850774  | 1.718107411 | 3.390853643  | 0.000696753 |
| ENSG00000204410 | 310.1485289 | -2.848773282 | 0.840234625 | -3.390449759 | 0.00069778  |
| ENSG00000131094 | 123.4068716 | -2.390641843 | 0.705172771 | -3.390150529 | 0.000698543 |
| ENSG00000173276 | 3404.960422 | 1.035948672  | 0.305860514 | 3.386997097  | 0.000706621 |
| ENSG00000011485 | 2599.466938 | -1.067398741 | 0.315185867 | -3.38656918  | 0.000707724 |
| ENSG00000115977 | 970.6053067 | 1.49601699   | 0.442050899 | 3.384264105  | 0.000713693 |
| ENSG00000255441 | 5.347155545 | -5.856423028 | 1.731249857 | -3.382771704 | 0.000717583 |
| ENSG00000216867 | 9.353666856 | -3.745082043 | 1.107130389 | -3.382692842 | 0.000717789 |
| ENSG00000114784 | 2169.670358 | 1.316971404  | 0.389409241 | 3.381972654  | 0.000719673 |
| ENSG00000128881 | 1303.259476 | 1.059706337  | 0.31339091  | 3.381420149  | 0.000721122 |
| ENSG00000124207 | 7491.967117 | -1.427935188 | 0.422299137 | -3.381335793 | 0.000721343 |
| ENSG00000213347 | 438.8598591 | -1.985446148 | 0.587288258 | -3.380701249 | 0.000723011 |
| ENSG00000125901 | 1370.772045 | -1.237104885 | 0.365998933 | -3.380077848 | 0.000724653 |
| ENSG00000127928 | 129.613062  | 1.578046502  | 0.466906512 | 3.379791159  | 0.000725409 |
| ENSG00000175213 | 731.3052587 | 1.509916513  | 0.446939254 | 3.378348397  | 0.000729226 |
| ENSG00000181004 | 300.5444146 | 1.253842909  | 0.371440784 | 3.375619922  | 0.000736496 |
| ENSG00000136824 | 1118.407506 | -1.36582972  | 0.404629673 | -3.375505587 | 0.000736802 |
| ENSG00000257167 | 39.08266233 | -1.917855547 | 0.568226045 | -3.375163042 | 0.00073772  |
| ENSG00000133119 | 958.3995994 | -1.616289409 | 0.478955421 | -3.374613455 | 0.000739194 |
| ENSG00000172216 | 4527.673821 | 1.18272251   | 0.350507958 | 3.37431001   | 0.00074001  |
| ENSG00000257097 | 23.18242494 | 3.093155573  | 0.916748039 | 3.374052019  | 0.000740704 |
| ENSG00000183048 | 185.2201762 | -2.209791346 | 0.65505139  | -3.373462571 | 0.000742291 |
| ENSG00000132341 | 17185.78626 | -0.995947844 | 0.295250612 | -3.373228715 | 0.000742922 |
| ENSG00000255468 | 50.61829235 | -2.230866424 | 0.661426564 | -3.372810445 | 0.000744052 |
| ENSG00000126953 | 414.9467817 | -1.430999715 | 0.424298036 | -3.372628653 | 0.000744543 |
| ENSG00000104147 | 250.5751019 | -1.50083585  | 0.445073838 | -3.372105308 | 0.000745959 |
| ENSG00000117475 | 1990.489605 | 1.530402913  | 0.45398977  | 3.371007483  | 0.000748938 |
| ENSG00000163462 | 222.5190569 | -1.554056793 | 0.461264363 | -3.36912391  | 0.000754075 |
| ENSG00000160336 | 1410.020653 | 1.493961616  | 0.443476536 | 3.368750083  | 0.000755099 |
| ENSG00000123064 | 3152.419314 | -1.053435166 | 0.312721603 | -3.368603757 | 0.0007555   |
| ENSG00000171097 | 346.6142466 | -1.252315387 | 0.371793628 | -3.368307824 | 0.000756311 |
| ENSG00000236256 | 21.82035072 | 2.553634773  | 0.758277344 | 3.367679113  | 0.000758038 |
| ENSG00000178977 | 46.5040505  | 2.162187191  | 0.642170841 | 3.366996837  | 0.000759916 |
| ENSG00000173566 | 179.4578048 | -1.588198437 | 0.471999064 | -3.364833868 | 0.000765898 |
| ENSG00000149554 | 1646.780936 | -1.355001392 | 0.402763991 | -3.364256544 | 0.000767502 |
| ENSG00000234292 | 11.96438234 | 4.529618077  | 1.346933896 | 3.362910452  | 0.000771254 |
| ENSG00000127324 | 15.49772494 | 2.949943471  | 0.877605606 | 3.361354408  | 0.000775612 |
| ENSG00000155657 | 438.9341532 | 1.420647745  | 0.422714129 | 3.360776582  | 0.000777237 |

|                 |             |              |             |              |             |
|-----------------|-------------|--------------|-------------|--------------|-------------|
| ENSG00000134802 | 187.1027406 | -1.371992091 | 0.408257213 | -3.360607103 | 0.000777714 |
| ENSG00000127870 | 3786.819753 | 1.423871418  | 0.423699081 | 3.360572355  | 0.000777812 |
| ENSG00000159231 | 107.2280494 | 1.294565357  | 0.385238379 | 3.360426757  | 0.000778222 |
| ENSG00000234329 | 40.37042898 | 2.202224264  | 0.655367973 | 3.360286668  | 0.000778616 |
| ENSG00000262503 | 76.13123826 | 2.133024736  | 0.634868949 | 3.359787464  | 0.000780025 |
| ENSG00000171867 | 9820.158476 | 0.982942619  | 0.292561239 | 3.359784174  | 0.000780034 |
| ENSG00000144535 | 840.8633783 | -0.935014574 | 0.278390005 | -3.358649946 | 0.000783242 |
| ENSG00000107140 | 1946.216484 | 1.644942426  | 0.489823731 | 3.358233427  | 0.000784423 |
| ENSG00000099956 | 2536.079526 | -1.201359114 | 0.357767107 | -3.357936184 | 0.000785267 |
| ENSG00000114767 | 1758.896921 | -1.676446582 | 0.499280513 | -3.35772484  | 0.000785868 |
| ENSG00000184545 | 818.7224819 | 0.981469356  | 0.292364615 | 3.357004601  | 0.000787918 |
| ENSG00000205485 | 290.1531772 | 1.664274178  | 0.495838419 | 3.356484927  | 0.0007894   |
| ENSG00000083720 | 1335.541911 | -1.393823484 | 0.415284589 | -3.356309195 | 0.000789902 |
| ENSG00000108528 | 1352.235302 | -1.336970962 | 0.398428332 | -3.355612177 | 0.000791895 |
| ENSG00000261924 | 92.83300845 | 3.203788723  | 0.954862487 | 3.355235718  | 0.000792974 |
| ENSG00000223572 | 160.1228054 | -1.726991651 | 0.514967767 | -3.353591745 | 0.0007977   |
| ENSG00000101280 | 51.95910915 | 2.840186318  | 0.847362174 | 3.351797386  | 0.000802888 |
| ENSG00000164404 | 41.84724828 | 2.029663829  | 0.605617127 | 3.351397671  | 0.000804047 |
| ENSG00000140990 | 2648.697098 | -1.441798763 | 0.430225099 | -3.351266042 | 0.00080443  |
| ENSG00000188993 | 41.58204785 | 1.946234095  | 0.580961761 | 3.35002099   | 0.000808054 |
| ENSG00000206652 | 6.827423751 | 5.254945474  | 1.56875368  | 3.349758181  | 0.000808821 |
| ENSG00000172432 | 4718.780634 | 1.412705888  | 0.421734257 | 3.349753696  | 0.000808834 |
| ENSG00000131115 | 948.4422588 | 1.592362181  | 0.475476823 | 3.348979601  | 0.000811098 |
| ENSG00000151014 | 2376.764746 | 2.071036246  | 0.618439107 | 3.348811908  | 0.000811589 |
| ENSG00000161981 | 465.6981878 | -1.208666205 | 0.361278519 | -3.34552469  | 0.00082127  |
| ENSG00000048162 | 1119.038131 | -1.110257746 | 0.331881085 | -3.34534806  | 0.000821794 |
| ENSG00000073536 | 1124.679344 | -1.072531829 | 0.320626471 | -3.345113166 | 0.00082249  |
| ENSG00000123219 | 433.1428074 | -1.845001849 | 0.551760066 | -3.343848102 | 0.00082625  |
| ENSG00000080561 | 427.9431262 | 1.279811777  | 0.382873103 | 3.342652613  | 0.000829817 |
| ENSG00000116991 | 1148.12999  | 1.056660172  | 0.316115804 | 3.342636333  | 0.000829866 |
| ENSG00000156869 | 658.5570202 | 0.940426182  | 0.28134383  | 3.342622385  | 0.000829907 |
| ENSG00000115657 | 229.9573142 | 1.478849286  | 0.442460471 | 3.342330858  | 0.00083078  |
| ENSG00000259330 | 132.9612793 | -1.226009845 | 0.366825402 | -3.342216316 | 0.000831123 |
| ENSG00000106689 | 362.0656351 | -1.048830481 | 0.313830403 | -3.342029555 | 0.000831682 |
| ENSG00000250271 | 80.54721632 | 1.773016456  | 0.530592447 | 3.341578773  | 0.000833034 |
| ENSG00000168374 | 11749.22752 | 1.247375752  | 0.373446828 | 3.340169629  | 0.000837272 |
| ENSG00000214182 | 2838.122193 | -1.555864892 | 0.465867388 | -3.339716263 | 0.00083864  |
| ENSG00000156232 | 1158.617839 | 1.525694436  | 0.456901466 | 3.339219831  | 0.000840141 |
| ENSG00000095906 | 1764.399981 | -0.87298446  | 0.261433892 | -3.339216856 | 0.00084015  |
| ENSG00000179091 | 6381.895057 | -1.293006834 | 0.387427284 | -3.337418114 | 0.000845606 |
| ENSG00000082269 | 1765.318942 | 1.22269453   | 0.366463507 | 3.336470091  | 0.000848496 |
| ENSG00000244479 | 287.6208052 | 1.494348048  | 0.447913827 | 3.336240046  | 0.000849198 |
| ENSG00000213339 | 670.780199  | -1.399611619 | 0.419534402 | -3.33610691  | 0.000849605 |
| ENSG00000176024 | 157.4096019 | 1.542937827  | 0.462642537 | 3.335053967  | 0.000852828 |
| ENSG00000173193 | 2189.317581 | 1.202250399  | 0.360526433 | 3.334708055  | 0.00085389  |
| ENSG00000144485 | 1078.937326 | -1.637194878 | 0.490989157 | -3.334482759 | 0.000854582 |
| ENSG00000120262 | 23.39932591 | 3.400256645  | 1.019756376 | 3.334381353  | 0.000854894 |

|                 |             |              |             |              |             |
|-----------------|-------------|--------------|-------------|--------------|-------------|
| ENSG00000260633 | 22.94969832 | 2.105736035  | 0.631712705 | 3.333376101  | 0.000857989 |
| ENSG00000116014 | 88.26301332 | -1.687719658 | 0.506432562 | -3.332565446 | 0.000860492 |
| ENSG00000184489 | 588.0736201 | -2.240734296 | 0.672417446 | -3.33235598  | 0.00086114  |
| ENSG00000196950 | 2127.616032 | -1.631182386 | 0.489519638 | -3.332210313 | 0.000861591 |
| ENSG00000257335 | 70.39955265 | 2.02157134   | 0.606730497 | 3.331909881  | 0.000862522 |
| ENSG00000130826 | 3967.837473 | -1.451955284 | 0.435776587 | -3.331879978 | 0.000862614 |
| ENSG00000132801 | 180.6851992 | 1.405207051  | 0.421755032 | 3.331808619  | 0.000862836 |
| ENSG00000204228 | 307.5747035 | -1.835057964 | 0.550815766 | -3.331527669 | 0.000863707 |
| ENSG00000141577 | 1114.56146  | -1.071364896 | 0.321740871 | -3.329899906 | 0.000868772 |
| ENSG00000159055 | 796.8549634 | -1.398030942 | 0.419910644 | -3.329353426 | 0.000870479 |
| ENSG00000171130 | 787.2603326 | -0.977770796 | 0.293776716 | -3.328278729 | 0.000873844 |
| ENSG00000175216 | 7884.351713 | -1.075827962 | 0.323300304 | -3.327642904 | 0.000875841 |
| ENSG00000205208 | 650.760654  | -1.534405377 | 0.461119413 | -3.327566209 | 0.000876082 |
| ENSG00000185298 | 2319.863998 | -0.842589498 | 0.253283143 | -3.32667026  | 0.000878903 |
| ENSG00000182308 | 198.5909368 | 1.978361395  | 0.594803724 | 3.326074324  | 0.000880784 |
| ENSG00000162066 | 192.4919076 | -1.676364561 | 0.504169824 | -3.324999797 | 0.000884186 |
| ENSG00000167977 | 5016.967452 | 1.424693336  | 0.428526884 | 3.324630001  | 0.000885359 |
| ENSG00000094914 | 1929.301019 | -1.132332292 | 0.340653059 | -3.324004473 | 0.000887348 |
| ENSG00000080802 | 1787.427843 | 1.348809301  | 0.405893114 | 3.323065251  | 0.000890341 |
| ENSG00000114854 | 65.08431359 | -2.343672152 | 0.705329268 | -3.322805755 | 0.000891169 |
| ENSG00000212123 | 62.94489271 | -2.538574973 | 0.764128673 | -3.322182587 | 0.000893162 |
| ENSG00000111450 | 1537.557087 | -1.088741698 | 0.327855407 | -3.320798356 | 0.000897604 |
| ENSG00000213160 | 1604.351097 | -1.33263687  | 0.401417392 | -3.319828431 | 0.000900728 |
| ENSG00000183977 | 24.9149931  | 2.217200077  | 0.667940299 | 3.319458463  | 0.000901922 |
| ENSG00000204178 | 1818.555739 | 1.665156798  | 0.501865264 | 3.317935946  | 0.000906853 |
| ENSG00000107290 | 10506.85663 | 1.245091586  | 0.375360563 | 3.317054876  | 0.000909717 |
| ENSG00000198435 | 953.0478814 | -1.438280411 | 0.433660262 | -3.316606424 | 0.000911179 |
| ENSG00000163491 | 98.3152565  | 2.245327881  | 0.677748767 | 3.312920644  | 0.000923272 |
| ENSG00000234393 | 18.85439172 | 3.264864489  | 0.985755004 | 3.31204455   | 0.000926168 |
| ENSG00000111912 | 1474.236567 | 1.04977767   | 0.316974124 | 3.311871825  | 0.00092674  |
| ENSG00000162377 | 894.5587432 | -1.174997469 | 0.354795092 | -3.311763595 | 0.000927099 |
| ENSG00000148362 | 869.9065072 | -1.516407486 | 0.457892407 | -3.311711364 | 0.000927272 |
| ENSG00000136811 | 2478.266255 | -1.152654158 | 0.348078413 | -3.311478436 | 0.000928044 |
| ENSG00000198932 | 95.96758138 | 1.964369647  | 0.593223182 | 3.311350107  | 0.00092847  |
| ENSG00000265452 | 28.55462092 | 2.392273772  | 0.72310199  | 3.308349039  | 0.000938478 |
| ENSG00000213073 | 132.9971107 | 2.076389235  | 0.627774192 | 3.307541565  | 0.000941187 |
| ENSG00000110104 | 979.5412543 | -1.556668996 | 0.470748359 | -3.306796437 | 0.000943694 |
| ENSG00000170100 | 888.6742229 | 1.242213783  | 0.375683735 | 3.306541288  | 0.000944554 |
| ENSG00000127616 | 4390.288404 | -0.936411532 | 0.283324686 | -3.305082749 | 0.000949484 |
| ENSG00000044459 | 240.2721147 | -1.257000714 | 0.380533937 | -3.303255222 | 0.000955694 |
| ENSG00000181894 | 369.7367205 | 1.598387502  | 0.484027338 | 3.302266992  | 0.000959067 |
| ENSG00000106144 | 2300.806977 | -0.909416544 | 0.275410823 | -3.30203633  | 0.000959856 |
| ENSG00000232725 | 15.22613123 | 3.148376916  | 0.953545642 | 3.301757964  | 0.000960809 |
| ENSG00000267586 | 9.900808325 | 4.246163524  | 1.28626982  | 3.301145265  | 0.00096291  |
| ENSG00000235109 | 703.3105563 | 1.273542444  | 0.385848253 | 3.300630323  | 0.000964679 |
| ENSG00000146410 | 369.4163207 | -1.729340993 | 0.523987131 | -3.300350124 | 0.000965643 |
| ENSG00000148572 | 1306.405586 | 0.903490151  | 0.273841136 | 3.299322239  | 0.000969186 |

|                 |             |              |             |              |             |
|-----------------|-------------|--------------|-------------|--------------|-------------|
| ENSG00000101986 | 1359.97002  | 1.598945281  | 0.484698335 | 3.298846241  | 0.000970831 |
| ENSG00000178913 | 3210.268057 | 1.012015499  | 0.30679068  | 3.298716567  | 0.000971279 |
| ENSG00000196960 | 7.319134705 | 5.345248478  | 1.621159888 | 3.297175385  | 0.000976625 |
| ENSG00000125520 | 1320.923408 | -1.773833054 | 0.538010223 | -3.297024812 | 0.000977149 |
| ENSG00000102786 | 2342.581414 | 1.084644284  | 0.329046732 | 3.296322916  | 0.000979593 |
| ENSG00000152463 | 30.43387447 | 2.707591766  | 0.821569407 | 3.295633631  | 0.000982    |
| ENSG00000023318 | 2777.372723 | 1.134504957  | 0.344245305 | 3.295629428  | 0.000982015 |
| ENSG00000144579 | 1441.188413 | -1.367402322 | 0.415050541 | -3.294544128 | 0.000985815 |
| ENSG00000204386 | 1762.055733 | 1.319827506  | 0.400639486 | 3.294302116  | 0.000986664 |
| ENSG00000107130 | 3019.300844 | -1.048643661 | 0.318353627 | -3.293958581 | 0.000987871 |
| ENSG00000187475 | 7.684278143 | 5.415669191  | 1.644344898 | 3.293511719  | 0.000989442 |
| ENSG00000136114 | 133.3406422 | 1.837844765  | 0.55805848  | 3.293283468  | 0.000990246 |
| ENSG00000139291 | 486.4290627 | -1.182585141 | 0.359107222 | -3.293125476 | 0.000990802 |
| ENSG00000117036 | 3131.445106 | 1.127054628  | 0.342301715 | 3.292576631  | 0.000992738 |
| ENSG00000103202 | 784.2688483 | -1.534280642 | 0.465999484 | -3.292451376 | 0.000993181 |
| ENSG00000173120 | 7374.20613  | 1.469773586  | 0.44645048  | 3.292131267  | 0.000994312 |
| ENSG00000184697 | 13.53165276 | 2.784301522  | 0.845924402 | 3.291430671  | 0.000996792 |
| ENSG00000094916 | 5217.346939 | -1.118913192 | 0.340087439 | -3.290075037 | 0.001001607 |
| ENSG00000235631 | 8.272534955 | 4.55356268   | 1.384307907 | 3.28941463   | 0.00100396  |
| ENSG00000125434 | 129.6285156 | -1.76939595  | 0.5380821   | -3.288338251 | 0.001007807 |
| ENSG00000008838 | 2642.599687 | -0.98926393  | 0.300892302 | -3.287767497 | 0.001009852 |
| ENSG00000196352 | 3439.18433  | 1.136026493  | 0.345674781 | 3.286402585  | 0.001014759 |
| ENSG00000151553 | 2222.927333 | 1.303714776  | 0.396793552 | 3.285624903  | 0.001017564 |
| ENSG00000162413 | 3721.676559 | 1.582504563  | 0.481823391 | 3.284407922  | 0.001021969 |
| ENSG00000171621 | 1287.225475 | 0.972662406  | 0.296169843 | 3.28413722   | 0.001022951 |
| ENSG00000106327 | 252.5327588 | -1.156858837 | 0.352349061 | -3.283274927 | 0.001026085 |
| ENSG00000260423 | 28.97537799 | -2.342862694 | 0.713706859 | -3.282668037 | 0.001028297 |
| ENSG00000143314 | 1666.750659 | -1.37822605  | 0.419989069 | -3.281575998 | 0.001032287 |
| ENSG00000091164 | 5544.842265 | 1.329665642  | 0.40530686  | 3.280639372  | 0.001035721 |
| ENSG00000108306 | 607.903911  | 1.211607375  | 0.369401697 | 3.279918265  | 0.001038372 |
| ENSG00000105281 | 12027.4881  | 1.089788932  | 0.332271178 | 3.279817829  | 0.001038741 |
| ENSG00000144040 | 1150.132033 | 1.754232749  | 0.535014083 | 3.278853407  | 0.001042298 |
| ENSG00000177575 | 4.777914417 | 5.730020341  | 1.748011419 | 3.27802226   | 0.001045372 |
| ENSG00000126775 | 1811.3172   | 1.330783865  | 0.40620488  | 3.276139532  | 0.001052366 |
| ENSG00000133878 | 7.881052173 | 4.558457949  | 1.391534004 | 3.275850921  | 0.001053442 |
| ENSG00000160767 | 1946.171405 | -1.039037237 | 0.31727892  | -3.274838547 | 0.001057224 |
| ENSG00000177156 | 4200.26736  | -0.896861624 | 0.27387887  | -3.274665268 | 0.001057872 |
| ENSG00000109270 | 1565.442152 | 1.403860741  | 0.428802592 | 3.273909176  | 0.001060707 |
| ENSG00000178531 | 651.9840103 | -2.309910311 | 0.705977024 | -3.271934119 | 0.001068145 |
| ENSG00000100330 | 3549.074127 | 1.077600311  | 0.329350279 | 3.271897369  | 0.001068283 |
| ENSG00000028203 | 3558.661057 | 1.191549513  | 0.364194102 | 3.271743026  | 0.001068867 |
| ENSG00000240602 | 174.2045618 | 1.092986326  | 0.334079577 | 3.271634667  | 0.001069277 |
| ENSG00000151687 | 72.69454385 | 1.906162496  | 0.582686481 | 3.271334688  | 0.001070411 |
| ENSG00000147535 | 1768.552389 | 1.530469423  | 0.467907808 | 3.270878146  | 0.001072141 |
| ENSG00000112667 | 1033.488771 | -1.693569101 | 0.51786575  | -3.270285976 | 0.001074388 |
| ENSG00000161999 | 860.8321097 | -0.984105446 | 0.300991893 | -3.269541366 | 0.00107722  |
| ENSG00000198538 | 1182.015605 | 1.222071827  | 0.374057033 | 3.267073517  | 0.001086655 |

|                 |             |              |             |              |             |
|-----------------|-------------|--------------|-------------|--------------|-------------|
| ENSG00000160014 | 9112.669137 | -1.106270283 | 0.338725001 | -3.265983561 | 0.001090846 |
| ENSG00000091483 | 2112.865864 | -1.035944221 | 0.317211832 | -3.265780522 | 0.001091628 |
| ENSG00000154035 | 618.1813738 | 1.364229316  | 0.417814976 | 3.265151787  | 0.001094054 |
| ENSG00000164879 | 44.21482044 | 1.728116143  | 0.52935771  | 3.264552707  | 0.001096371 |
| ENSG00000159259 | 1317.076352 | -1.400284549 | 0.428953403 | -3.264421123 | 0.00109688  |
| ENSG00000006625 | 1296.236852 | -1.231653773 | 0.37730082  | -3.26438138  | 0.001097034 |
| ENSG00000223802 | 22.78146534 | 2.393173757  | 0.733136858 | 3.264293333  | 0.001097375 |
| ENSG00000213465 | 394.3319979 | -1.426489702 | 0.43704647  | -3.263931411 | 0.001098778 |
| ENSG00000198298 | 106.1056944 | -1.739046373 | 0.532866414 | -3.263569116 | 0.001100183 |
| ENSG00000136802 | 3660.702507 | 1.589847207  | 0.487193099 | 3.263279407  | 0.001101309 |
| ENSG00000180011 | 861.4229832 | -1.206224973 | 0.369646188 | -3.263187909 | 0.001101664 |
| ENSG00000080815 | 3225.777243 | 1.074199305  | 0.329244742 | 3.262616426  | 0.001103888 |
| ENSG00000173812 | 25957.27616 | 1.188655375  | 0.364347083 | 3.262425938  | 0.00110463  |
| ENSG00000180423 | 158.2534851 | 1.466007425  | 0.449420212 | 3.26199709   | 0.001106303 |
| ENSG00000135454 | 2760.735259 | 1.675630817  | 0.513754666 | 3.26153888   | 0.001108092 |
| ENSG00000165312 | 538.3442083 | 0.913753173  | 0.280201645 | 3.261055711  | 0.001109982 |
| ENSG00000102743 | 428.2135415 | -1.572104387 | 0.482126139 | -3.26077402  | 0.001111086 |
| ENSG00000116209 | 4653.877625 | 1.261842023  | 0.387003374 | 3.26054528   | 0.001111982 |
| ENSG00000260751 | 123.3348044 | 2.211648088  | 0.678410325 | 3.260044851  | 0.001113946 |
| ENSG00000048405 | 2112.820871 | 1.168712048  | 0.358665733 | 3.258499322  | 0.001120031 |
| ENSG00000224597 | 1196.096165 | 1.485289567  | 0.455834084 | 3.258399533  | 0.001120425 |
| ENSG00000105642 | 71.74730279 | 1.592137727  | 0.488674751 | 3.258072414  | 0.001121718 |
| ENSG00000253304 | 308.4599098 | -1.36066064  | 0.417674849 | -3.257703073 | 0.001123179 |
| ENSG00000075043 | 1160.484856 | -1.890252866 | 0.580374404 | -3.256954222 | 0.001126146 |
| ENSG00000153574 | 1234.133118 | -1.550835177 | 0.476419873 | -3.255185739 | 0.001133182 |
| ENSG00000187833 | 34.45774998 | -2.757451108 | 0.847238046 | -3.254635601 | 0.001135379 |
| ENSG00000158234 | 301.8148691 | -0.990880365 | 0.304478952 | -3.254347658 | 0.001136531 |
| ENSG00000154342 | 146.080568  | -1.145845714 | 0.352127246 | -3.254067183 | 0.001137654 |
| ENSG00000269609 | 504.3471282 | -1.30551587  | 0.401230061 | -3.253783793 | 0.001138789 |
| ENSG00000165388 | 159.3099557 | -2.433249772 | 0.747852172 | -3.253650739 | 0.001139323 |
| ENSG00000012124 | 219.3467324 | -1.533113611 | 0.471272798 | -3.253134101 | 0.001141396 |
| ENSG00000119878 | 1203.338271 | 1.35032146   | 0.415300478 | 3.251432473  | 0.00114825  |
| ENSG00000163659 | 4432.51809  | 1.27217088   | 0.39134444  | 3.250770295  | 0.001150928 |
| ENSG00000267265 | 144.1789058 | 1.664782761  | 0.512255828 | 3.249904968  | 0.001154436 |
| ENSG00000057757 | 4617.278548 | 1.909426216  | 0.587571147 | 3.249693633  | 0.001155294 |
| ENSG00000134070 | 526.4092418 | 1.395109074  | 0.429335158 | 3.249463844  | 0.001156228 |
| ENSG00000135077 | 41.04202824 | 2.712719589  | 0.834882996 | 3.249221272  | 0.001157214 |
| ENSG00000103067 | 1417.909681 | -1.23480635  | 0.380047424 | -3.249084906 | 0.001157769 |
| ENSG00000080608 | 1410.466381 | -1.223157472 | 0.376606979 | -3.247835388 | 0.001162865 |
| ENSG00000140983 | 1571.314108 | -1.050493411 | 0.323473102 | -3.24754486  | 0.001164053 |
| ENSG00000160285 | 1924.479693 | -1.75954521  | 0.542015521 | -3.246300415 | 0.001169154 |
| ENSG00000162923 | 8923.216735 | 1.281346249  | 0.394743055 | 3.246026078  | 0.001170281 |
| ENSG00000237594 | 15.88810851 | -2.719400618 | 0.837876182 | -3.245587683 | 0.001172085 |
| ENSG00000181418 | 294.6251369 | -1.579740184 | 0.486955761 | -3.244114377 | 0.001178164 |
| ENSG00000136643 | 2472.924121 | 1.2417561    | 0.382790687 | 3.243955879  | 0.00117882  |
| ENSG00000228313 | 16.54210686 | 2.957143146  | 0.911585521 | 3.243955808  | 0.00117882  |
| ENSG00000123395 | 1534.151994 | 1.244143224  | 0.383565865 | 3.243623421  | 0.001180197 |

|                 |             |              |             |              |             |
|-----------------|-------------|--------------|-------------|--------------|-------------|
| ENSG00000139173 | 405.5089223 | 1.468539228  | 0.452766207 | 3.243482411  | 0.001180781 |
| ENSG00000108733 | 425.1892035 | 1.157184134  | 0.356886933 | 3.242439063  | 0.001185113 |
| ENSG00000257267 | 1243.43038  | 1.407854627  | 0.434340158 | 3.241364175  | 0.001189591 |
| ENSG00000069998 | 1783.796011 | -1.172823096 | 0.361843715 | -3.241242138 | 0.0011901   |
| ENSG00000176244 | 78.76494179 | -1.918893805 | 0.592217279 | -3.240185443 | 0.00119452  |
| ENSG00000182310 | 54.99255447 | -1.611211614 | 0.497391206 | -3.23932469  | 0.001198131 |
| ENSG00000242180 | 115.8866561 | -2.014950547 | 0.622096985 | -3.238965297 | 0.001199642 |
| ENSG00000182208 | 1016.78182  | 1.353594214  | 0.417931636 | 3.238793373  | 0.001200365 |
| ENSG00000228782 | 314.5764606 | 1.558755793  | 0.481321165 | 3.238494187  | 0.001201625 |
| ENSG00000244625 | 85.24861614 | 1.808943827  | 0.558647084 | 3.238079779  | 0.001203372 |
| ENSG00000162695 | 2912.722477 | 1.232300877  | 0.380672861 | 3.23716504   | 0.001207236 |
| ENSG00000178409 | 357.9006129 | -0.997937642 | 0.308276156 | -3.23715481  | 0.001207279 |
| ENSG00000165238 | 961.8907208 | -1.359824646 | 0.420167121 | -3.236389946 | 0.001210519 |
| ENSG00000184205 | 2210.551714 | 1.532069325  | 0.473427058 | 3.236125396  | 0.001211641 |
| ENSG00000235173 | 28.72085069 | -2.518903506 | 0.778492094 | -3.235618611 | 0.001213794 |
| ENSG00000010610 | 131.456432  | 1.679910542  | 0.519222758 | 3.235433186  | 0.001214583 |
| ENSG00000130309 | 3871.799194 | -1.527012742 | 0.472022718 | -3.235040781 | 0.001216254 |
| ENSG00000149948 | 6974.351714 | -1.707738533 | 0.527963034 | -3.234579739 | 0.001218219 |
| ENSG00000152684 | 2718.302553 | 1.365960593  | 0.422480899 | 3.233188998  | 0.001224165 |
| ENSG00000109111 | 12039.4813  | 1.611491433  | 0.498583834 | 3.232137352  | 0.00122868  |
| ENSG00000228106 | 108.2440257 | 1.412965315  | 0.437173674 | 3.232045748  | 0.001229074 |
| ENSG00000269175 | 18.36144919 | -2.350606447 | 0.727283386 | -3.232036499 | 0.001229114 |
| ENSG00000162551 | 24.08064566 | -2.657664077 | 0.822412879 | -3.231544818 | 0.00123123  |
| ENSG00000156050 | 222.2962481 | 1.161879823  | 0.359564907 | 3.23134933   | 0.001232073 |
| ENSG00000197933 | 465.8130945 | 1.202456361  | 0.372435208 | 3.228632347  | 0.001243837 |
| ENSG00000090447 | 729.5809963 | -1.366294848 | 0.42327315  | -3.227927043 | 0.001246908 |
| ENSG00000256673 | 34.04043296 | -2.503994599 | 0.775789124 | -3.227674277 | 0.00124801  |
| ENSG00000188130 | 2065.561783 | -1.129408951 | 0.349972674 | -3.227134672 | 0.001250366 |
| ENSG00000037637 | 2122.968741 | 1.035352713  | 0.320879582 | 3.226608275  | 0.001252668 |
| ENSG00000186919 | 33.07532091 | 2.799940596  | 0.8680319   | 3.225619468  | 0.001257004 |
| ENSG00000119760 | 3009.803984 | 1.336583912  | 0.414420533 | 3.225187478  | 0.001258902 |
| ENSG00000100979 | 315.9961611 | 1.561694865  | 0.484321925 | 3.224497561  | 0.001261939 |
| ENSG00000144802 | 683.003368  | 1.398207366  | 0.43363355  | 3.224398495  | 0.001262376 |
| ENSG00000184990 | 1307.441444 | -1.211992809 | 0.376251532 | -3.22123023  | 0.001276416 |
| ENSG00000116062 | 2490.101982 | -1.03572329  | 0.321805128 | -3.218479753 | 0.001288721 |
| ENSG00000175318 | 322.1543301 | -1.266358135 | 0.393501017 | -3.218182626 | 0.001290057 |
| ENSG00000188033 | 216.2532763 | 1.98806835   | 0.617808135 | 3.217938122  | 0.001291157 |
| ENSG00000204406 | 841.8358572 | 1.215132924  | 0.377688086 | 3.217292173  | 0.001294067 |
| ENSG00000197905 | 743.8304572 | -1.299239976 | 0.403863308 | -3.217029006 | 0.001295255 |
| ENSG00000113615 | 2981.621519 | 1.07331283   | 0.333651346 | 3.216869472  | 0.001295975 |
| ENSG00000073050 | 598.4958944 | -1.321295408 | 0.410749099 | -3.216794416 | 0.001296315 |
| ENSG00000100258 | 1133.546898 | -1.027546422 | 0.319438484 | -3.216727083 | 0.001296619 |
| ENSG00000167601 | 2913.633393 | -1.558864337 | 0.484673337 | -3.216319569 | 0.001298462 |
| ENSG00000145246 | 769.1851752 | 1.428575499  | 0.444323096 | 3.215172724  | 0.001303661 |
| ENSG00000249911 | 21.45315012 | 3.412767172  | 1.06154232  | 3.21491391   | 0.001304836 |
| ENSG00000249345 | 37.08395294 | 1.702668374  | 0.529622672 | 3.214870632  | 0.001305033 |
| ENSG00000068976 | 119.6255617 | 1.821745599  | 0.56679412  | 3.214122264  | 0.001308439 |

|                 |             |              |             |              |             |
|-----------------|-------------|--------------|-------------|--------------|-------------|
| ENSG00000121749 | 2497.685375 | 1.243154416  | 0.386953491 | 3.212671409  | 0.001315067 |
| ENSG00000184348 | 18.19547662 | 3.41743645   | 1.063814382 | 3.212436783  | 0.001316141 |
| ENSG00000106328 | 26.20945109 | 2.289893584  | 0.713091392 | 3.211220343  | 0.001321725 |
| ENSG00000144218 | 6.768303676 | 5.229161174  | 1.629267968 | 3.209515731  | 0.001329588 |
| ENSG00000171224 | 1461.097762 | 1.793444178  | 0.558791363 | 3.209505903  | 0.001329633 |
| ENSG00000182173 | 1800.951981 | -1.206990934 | 0.376074311 | -3.209447966 | 0.001329901 |
| ENSG00000089006 | 4438.768477 | -1.210170811 | 0.377094475 | -3.209197934 | 0.001331058 |
| ENSG00000164403 | 433.3257382 | -1.2493929   | 0.389386734 | -3.208617018 | 0.00133375  |
| ENSG00000203952 | 36.87185983 | 1.745868771  | 0.544155    | 3.208403437  | 0.001334741 |
| ENSG00000162599 | 667.6917843 | -1.1455306   | 0.357133712 | -3.207567813 | 0.001338625 |
| ENSG00000166024 | 1038.436145 | 1.184857809  | 0.369518667 | 3.206489728  | 0.001343651 |
| ENSG00000215190 | 248.3250398 | 1.871973989  | 0.58389787  | 3.20599558   | 0.001345961 |
| ENSG00000075407 | 3407.976608 | 1.32426636   | 0.413063315 | 3.205964585  | 0.001346106 |
| ENSG00000138696 | 17.239945   | 4.001277909  | 1.248209365 | 3.205614396  | 0.001347745 |
| ENSG00000149136 | 8738.962395 | -1.101130182 | 0.343560555 | -3.20505415  | 0.001350371 |
| ENSG00000028839 | 1551.178405 | 1.19527049   | 0.373120884 | 3.203440338  | 0.001357962 |
| ENSG00000184709 | 10.88179729 | -4.136071855 | 1.291523479 | -3.202475155 | 0.001362521 |
| ENSG00000239382 | 329.0286322 | 1.846316856  | 0.57666004  | 3.201742321  | 0.001365991 |
| ENSG00000101236 | 2018.572958 | 1.28214031   | 0.400594955 | 3.200590255  | 0.001371464 |
| ENSG00000173545 | 2353.220142 | 1.478418515  | 0.462107859 | 3.199293165  | 0.00137765  |
| ENSG00000198089 | 935.5172672 | -1.399382819 | 0.437463332 | -3.198857403 | 0.001379734 |
| ENSG00000121957 | 1901.683812 | -1.4258157   | 0.445759756 | -3.198619166 | 0.001380875 |
| ENSG00000171606 | 1016.884749 | 1.396480259  | 0.436599562 | 3.198537933  | 0.001381264 |
| ENSG00000048342 | 405.5424913 | -1.388475199 | 0.434138663 | -3.198229774 | 0.001382741 |
| ENSG00000163959 | 145.5221076 | 1.596456917  | 0.499273681 | 3.197558728  | 0.001385962 |
| ENSG00000131781 | 62.16042423 | 1.676966515  | 0.524482829 | 3.197371625  | 0.001386861 |
| ENSG00000215883 | 204.5372145 | -1.771723943 | 0.554274387 | -3.1964745   | 0.001391181 |
| ENSG00000157326 | 261.1083878 | -1.133490563 | 0.354777426 | -3.194934288 | 0.001398627 |
| ENSG00000116903 | 2167.009662 | 1.432380897  | 0.448377978 | 3.194583514  | 0.001400328 |
| ENSG00000236199 | 31.17976807 | 2.824911318  | 0.884548052 | 3.193621093  | 0.001405004 |
| ENSG00000255010 | 12.25295868 | 4.665724048  | 1.462003861 | 3.191321291  | 0.001416237 |
| ENSG00000185482 | 112.0334278 | -1.525557632 | 0.47804458  | -3.191245539 | 0.001416608 |
| ENSG00000113389 | 60.60491003 | 1.777869366  | 0.557325468 | 3.190002014  | 0.001422718 |
| ENSG00000132330 | 116.409561  | -1.220233013 | 0.382970962 | -3.186228554 | 0.001441407 |
| ENSG00000198736 | 1651.725633 | 1.571565469  | 0.493238645 | 3.186217227  | 0.001441463 |
| ENSG00000124762 | 23399.83383 | 1.302856386  | 0.409166675 | 3.184170326  | 0.001451696 |
| ENSG00000105497 | 937.1393519 | 1.531457586  | 0.481053493 | 3.183549454  | 0.001454813 |
| ENSG00000166888 | 2228.565288 | -1.264616685 | 0.397389037 | -3.182313974 | 0.001461033 |
| ENSG00000169813 | 10197.08253 | -0.98304606  | 0.308987775 | -3.1815047   | 0.001465121 |
| ENSG00000115694 | 3050.5853   | -1.123332206 | 0.35308397  | -3.181487408 | 0.001465209 |
| ENSG00000173546 | 1491.653377 | -1.280439945 | 0.402518412 | -3.181071742 | 0.001467313 |
| ENSG00000182903 | 2648.051952 | 1.38420429   | 0.435139072 | 3.181061823  | 0.001467363 |
| ENSG00000132589 | 2374.41087  | -1.161927685 | 0.365500377 | -3.179005432 | 0.001477813 |
| ENSG00000224431 | 51.30109046 | 1.771313598  | 0.557288307 | 3.178451037  | 0.001480642 |
| ENSG00000142856 | 805.7211498 | -1.234282896 | 0.38836914  | -3.178117846 | 0.001482345 |
| ENSG00000178202 | 1005.262926 | -0.968861912 | 0.304856484 | -3.178091869 | 0.001482478 |
| ENSG00000198853 | 2215.513157 | 1.618640099  | 0.509505987 | 3.176881408  | 0.001488679 |

|                 |             |              |             |              |             |
|-----------------|-------------|--------------|-------------|--------------|-------------|
| ENSG00000159479 | 1714.599734 | 1.463839184  | 0.46089395  | 3.176086782  | 0.001492763 |
| ENSG00000184986 | 143.6920322 | -1.25135166  | 0.394041425 | -3.175685548 | 0.001494829 |
| ENSG00000167699 | 2257.976568 | -1.024729955 | 0.322753028 | -3.174966199 | 0.00149854  |
| ENSG00000162783 | 4685.036981 | 1.111437966  | 0.350071802 | 3.174885723  | 0.001498955 |
| ENSG00000138798 | 83.17445931 | 1.75114909   | 0.551876361 | 3.173082258  | 0.001508298 |
| ENSG00000188242 | 168.9947939 | -1.388394034 | 0.43762283  | -3.172581362 | 0.001510902 |
| ENSG00000136152 | 2025.239243 | 0.956961645  | 0.301812199 | 3.170718907  | 0.001520622 |
| ENSG00000179361 | 1142.562706 | 1.504284241  | 0.474654602 | 3.169218697  | 0.001528493 |
| ENSG00000075618 | 8660.629397 | -1.0168599   | 0.320903389 | -3.168741548 | 0.001531005 |
| ENSG00000060566 | 22.08727685 | -2.166440892 | 0.683703742 | -3.168683685 | 0.00153131  |
| ENSG00000186448 | 2034.976048 | 1.216109109  | 0.383795129 | 3.168641335  | 0.001531533 |
| ENSG00000163602 | 3364.205461 | 0.936513088  | 0.295564706 | 3.168555207  | 0.001531987 |
| ENSG00000244097 | 21.47266276 | 3.151548777  | 0.994674728 | 3.168421484  | 0.001532691 |
| ENSG00000188290 | 1037.311668 | -2.01778152  | 0.637187077 | -3.166701888 | 0.001541783 |
| ENSG00000180902 | 521.2845578 | -2.063235815 | 0.651800335 | -3.165441476 | 0.001548478 |
| ENSG00000119048 | 2419.38163  | 0.945278711  | 0.298669193 | 3.164968909  | 0.001550995 |
| ENSG00000213693 | 85.64599089 | 1.85000574   | 0.584620712 | 3.164454668  | 0.001553739 |
| ENSG00000135452 | 743.9317021 | 1.023552344  | 0.323494173 | 3.164051874  | 0.001555891 |
| ENSG00000204394 | 7515.476264 | -1.041531118 | 0.329233731 | -3.163500637 | 0.00155884  |
| ENSG00000101871 | 2805.117828 | -0.866678027 | 0.273998495 | -3.163075869 | 0.001561116 |
| ENSG00000272405 | 4548.743079 | 1.113781143  | 0.352132445 | 3.162960869  | 0.001561733 |
| ENSG00000178952 | 10035.83589 | -0.879948973 | 0.278226397 | -3.162708433 | 0.001563088 |
| ENSG00000042832 | 21.7102255  | 2.526941571  | 0.799069877 | 3.162353687  | 0.001564994 |
| ENSG00000164117 | 660.3972954 | 1.009040385  | 0.319095694 | 3.162187407  | 0.001565888 |
| ENSG00000074219 | 750.3343881 | -1.004511432 | 0.317784048 | -3.160987587 | 0.001572352 |
| ENSG00000248206 | 10.53010589 | 4.922263428  | 1.557391211 | 3.160582514  | 0.00157454  |
| ENSG00000154263 | 71.05293589 | 2.234588911  | 0.707255191 | 3.159522812  | 0.001580277 |
| ENSG00000112343 | 1705.74111  | 1.24130453   | 0.392999089 | 3.158543024  | 0.001585599 |
| ENSG00000160193 | 439.7969574 | -1.300941477 | 0.411887136 | -3.158490189 | 0.001585886 |
| ENSG00000184900 | 927.4340523 | -1.078082002 | 0.341345469 | -3.158331078 | 0.001586752 |
| ENSG00000140474 | 1554.28703  | -1.147308017 | 0.363302519 | -3.157996313 | 0.001588576 |
| ENSG00000141027 | 2801.051238 | 0.924785382  | 0.293049305 | 3.155733069  | 0.001600953 |
| ENSG00000100209 | 387.124706  | 1.070803132  | 0.339327185 | 3.155665623  | 0.001601323 |
| ENSG00000235213 | 6.371974073 | 5.135635624  | 1.627457058 | 3.155619744  | 0.001601575 |
| ENSG00000104369 | 780.4976354 | -1.893194149 | 0.600216042 | -3.154187854 | 0.001609454 |
| ENSG00000170037 | 1830.187643 | -1.040135004 | 0.329768989 | -3.154132251 | 0.001609761 |
| ENSG00000120694 | 15610.35721 | 1.903997025  | 0.603657579 | 3.154101085  | 0.001609933 |
| ENSG00000168917 | 287.7423146 | 1.480227034  | 0.469320443 | 3.153979453  | 0.001610604 |
| ENSG00000113356 | 2700.288221 | -1.2279269   | 0.389380342 | -3.153541068 | 0.001613025 |
| ENSG00000253598 | 135.2858582 | 1.45422508   | 0.461226807 | 3.152950043  | 0.001616295 |
| ENSG00000077312 | 2324.080118 | -1.156768453 | 0.367168261 | -3.150513204 | 0.001629839 |
| ENSG00000100031 | 1148.561081 | 1.893229386  | 0.600936195 | 3.150466556  | 0.001630099 |
| ENSG00000137700 | 1298.738628 | -1.882306647 | 0.597497991 | -3.150314607 | 0.001630947 |
| ENSG00000007541 | 315.2484426 | -1.154754159 | 0.366667252 | -3.149324498 | 0.001636484 |
| ENSG00000003400 | 127.0657029 | 1.219449583  | 0.387272033 | 3.148819125  | 0.001639316 |
| ENSG00000138442 | 2966.961661 | -1.014844949 | 0.322364737 | -3.148126428 | 0.001643206 |
| ENSG00000079393 | 59.62299593 | 1.84588841   | 0.586352138 | 3.14808848   | 0.001643419 |



|                 |             |              |             |              |             |
|-----------------|-------------|--------------|-------------|--------------|-------------|
| ENSG00000132256 | 2078.238861 | 0.996663605  | 0.316697162 | 3.147055687  | 0.001649235 |
| ENSG00000077616 | 234.9445318 | 1.413593395  | 0.449226542 | 3.146727238  | 0.001651089 |
| ENSG00000184162 | 576.1935907 | -1.320728634 | 0.41974784  | -3.146481074 | 0.00165248  |
| ENSG00000203760 | 432.5109241 | -1.342053003 | 0.426625879 | -3.145737445 | 0.001656687 |
| ENSG00000164867 | 322.465303  | -1.350020132 | 0.42927772  | -3.144864197 | 0.001661639 |
| ENSG00000196505 | 1520.705843 | 1.316323328  | 0.418793337 | 3.143133405  | 0.001671496 |
| ENSG00000187953 | 809.3660769 | 0.886078819  | 0.281937991 | 3.142814544  | 0.001673318 |
| ENSG00000128563 | 1410.573692 | 1.093073515  | 0.347852903 | 3.142344092  | 0.001676009 |
| ENSG00000272501 | 82.65733643 | 2.799399108  | 0.891172457 | 3.141254072  | 0.00168226  |
| ENSG00000132581 | 2324.945448 | 1.588776295  | 0.505871297 | 3.140672944  | 0.001685602 |
| ENSG00000163877 | 2119.994323 | 1.553510271  | 0.494943805 | 3.138760917  | 0.001696638 |
| ENSG00000141076 | 3184.26988  | -1.173045206 | 0.373792793 | -3.13822318  | 0.001699754 |
| ENSG00000263806 | 18.62295418 | 2.819087391  | 0.898332693 | 3.138132914  | 0.001700278 |
| ENSG00000166900 | 4130.605031 | 1.192693864  | 0.380098872 | 3.137851631  | 0.00170191  |
| ENSG00000105708 | 499.7194299 | 1.117132612  | 0.356097567 | 3.13715317   | 0.00170597  |
| ENSG00000129534 | 1228.81378  | -1.228308995 | 0.391687755 | -3.13593923  | 0.001713047 |
| ENSG00000028277 | 118.0704879 | 1.222650851  | 0.390164184 | 3.133682954  | 0.001726273 |
| ENSG00000138079 | 22.78012605 | 2.960579783  | 0.944783564 | 3.133606359  | 0.001726723 |
| ENSG00000116120 | 3306.877452 | -1.193059863 | 0.380759931 | -3.133365058 | 0.001728144 |
| ENSG00000112182 | 405.281345  | 1.174288059  | 0.374786902 | 3.133215311  | 0.001729026 |
| ENSG00000168993 | 392.6569716 | -1.91096621  | 0.609981236 | -3.132827862 | 0.001731309 |
| ENSG00000050327 | 1300.698226 | 1.058729456  | 0.337962459 | 3.132683609  | 0.00173216  |
| ENSG00000041982 | 16.88961732 | 2.325806367  | 0.742456651 | 3.132582038  | 0.00173276  |
| ENSG00000260368 | 27.97306395 | 2.575935283  | 0.822588953 | 3.131497541  | 0.001739172 |
| ENSG00000165181 | 56.17231457 | -1.633215932 | 0.521711001 | -3.130499316 | 0.001745094 |
| ENSG00000176933 | 20.27218534 | 2.464472234  | 0.787372343 | 3.129995935  | 0.001748087 |
| ENSG00000148019 | 2045.412836 | -0.82381334  | 0.263243705 | -3.12947024  | 0.001751218 |
| ENSG00000128591 | 9771.536602 | 1.74342754   | 0.557105804 | 3.129437045  | 0.001751416 |
| ENSG00000145416 | 229.9085428 | -1.276333342 | 0.40792888  | -3.128813393 | 0.001755137 |
| ENSG00000082126 | 31.8924124  | 2.767998257  | 0.884859798 | 3.128177213  | 0.001758941 |
| ENSG00000177971 | 1089.955758 | -1.335307963 | 0.426895563 | -3.12794997  | 0.001760301 |
| ENSG00000092931 | 1047.36841  | 1.083279204  | 0.346456784 | 3.126736881  | 0.00176758  |
| ENSG00000204371 | 2191.114084 | -1.289350963 | 0.412417373 | -3.126325534 | 0.001770055 |
| ENSG00000034677 | 1904.486878 | 0.921343167  | 0.29472314  | 3.126131077  | 0.001771226 |
| ENSG00000108784 | 292.4256708 | -1.921733794 | 0.614850047 | -3.125532482 | 0.001774835 |
| ENSG00000168913 | 52.11163596 | -2.241504341 | 0.717400041 | -3.124483153 | 0.001781177 |
| ENSG00000167528 | 1016.693033 | 1.233926761  | 0.394924389 | 3.124463301  | 0.001781297 |
| ENSG00000196700 | 644.8406856 | -1.402185082 | 0.448778896 | -3.124445235 | 0.001781407 |
| ENSG00000107771 | 3004.6023   | 0.880315087  | 0.281763874 | 3.124300766  | 0.001782282 |
| ENSG00000070495 | 4535.725072 | 1.299742805  | 0.416183289 | 3.12300575   | 0.001790143 |
| ENSG00000127993 | 1218.333682 | 1.437572305  | 0.460334184 | 3.122888446  | 0.001790856 |
| ENSG00000150990 | 1679.927149 | -1.306750695 | 0.418506995 | -3.122410645 | 0.001793765 |
| ENSG00000159199 | 2475.308045 | -1.344119611 | 0.430480718 | -3.122368915 | 0.00179402  |
| ENSG00000199072 | 8.189385801 | 5.508551116  | 1.76451992  | 3.121841276  | 0.001797238 |
| ENSG00000099994 | 217.7627312 | -1.879757775 | 0.602132967 | -3.121831683 | 0.001797297 |
| ENSG00000173273 | 5118.270726 | 1.275117056  | 0.408465565 | 3.121724734  | 0.00179795  |
| ENSG00000124103 | 27.94425995 | 2.650552132  | 0.849090985 | 3.121634994  | 0.001798498 |

|                 |             |              |             |              |             |
|-----------------|-------------|--------------|-------------|--------------|-------------|
| ENSG00000263316 | 61.40617291 | 1.776717781  | 0.569385011 | 3.120415441  | 0.001805961 |
| ENSG00000248159 | 18.72720635 | 3.249886371  | 1.041599723 | 3.120091431  | 0.001807949 |
| ENSG00000130544 | 896.0322529 | 1.20323793   | 0.385782744 | 3.118952182  | 0.001814954 |
| ENSG00000164603 | 610.9472803 | 1.295484476  | 0.41547717  | 3.118064165  | 0.001820432 |
| ENSG00000040487 | 974.8735346 | 1.568881912  | 0.50318241  | 3.11791883   | 0.00182133  |
| ENSG00000162994 | 340.1109141 | 1.209759061  | 0.388005732 | 3.117889659  | 0.00182151  |
| ENSG00000167085 | 5239.187068 | -0.919895932 | 0.29508661  | -3.117376059 | 0.001824687 |
| ENSG00000135048 | 3097.11539  | 1.250663683  | 0.401212225 | 3.117212305  | 0.0018257   |
| ENSG00000258168 | 257.6937395 | 1.129036467  | 0.362337555 | 3.1159797    | 0.001833349 |
| ENSG00000176222 | 7.929556859 | 4.015721364  | 1.28906076  | 3.115230474  | 0.001838012 |
| ENSG00000168769 | 1446.858307 | 1.394703824  | 0.447775834 | 3.1147367    | 0.001841092 |
| ENSG00000075188 | 1385.825422 | -1.179548878 | 0.378895987 | -3.113120537 | 0.001851204 |
| ENSG00000105991 | 262.4935248 | 1.467718107  | 0.471551492 | 3.112529873  | 0.001854912 |
| ENSG00000160606 | 226.799569  | -1.610584099 | 0.517618834 | -3.111525304 | 0.001861235 |
| ENSG00000159753 | 486.3389744 | -1.238601572 | 0.398192745 | -3.110557854 | 0.001867343 |
| ENSG00000172888 | 2642.932595 | 0.870768572  | 0.279970031 | 3.110220651  | 0.001869476 |
| ENSG00000198431 | 48002.76253 | 1.129042772  | 0.36313343  | 3.109167809  | 0.001876151 |
| ENSG00000203817 | 39.80648109 | -2.414722289 | 0.776648198 | -3.109158427 | 0.001876211 |
| ENSG00000252690 | 43.9338959  | 1.715782662  | 0.551921986 | 3.108741278  | 0.001878862 |
| ENSG00000270574 | 8.426330228 | 4.776966339  | 1.537850992 | 3.106260856  | 0.001894695 |
| ENSG00000175305 | 324.0861785 | -1.356260661 | 0.436629269 | -3.106206473 | 0.001895043 |
| ENSG00000146281 | 2184.053471 | -1.424390993 | 0.458579338 | -3.10609501  | 0.001895758 |
| ENSG00000154265 | 1324.493289 | 1.120514682  | 0.360760896 | 3.105975995  | 0.001896521 |
| ENSG00000170356 | 10.03216926 | 3.791431062  | 1.220691474 | 3.105969971  | 0.00189656  |
| ENSG00000184860 | 1948.304871 | 1.593279005  | 0.512999578 | 3.105809585  | 0.001897589 |
| ENSG00000110811 | 912.298983  | -1.248555191 | 0.402008509 | -3.105792944 | 0.001897695 |
| ENSG00000132000 | 42.28521811 | 2.321063764  | 0.747360892 | 3.105679986  | 0.00189842  |
| ENSG00000121552 | 233.8426469 | 1.37032415   | 0.441384362 | 3.104605119  | 0.001905332 |
| ENSG00000172500 | 1551.892041 | -1.406184833 | 0.452942051 | -3.104557926 | 0.001905636 |
| ENSG00000198315 | 4498.64242  | 1.200467547  | 0.386697355 | 3.104411062  | 0.001906582 |
| ENSG00000132824 | 6312.478843 | 0.958661068  | 0.308885946 | 3.103608566  | 0.001911761 |
| ENSG00000188157 | 4693.393018 | -1.653418787 | 0.532802396 | -3.103249536 | 0.001914082 |
| ENSG00000196072 | 4257.345883 | 1.414239164  | 0.455787837 | 3.102845331  | 0.001916698 |
| ENSG00000140403 | 8269.573413 | 1.874034479  | 0.60424558  | 3.101445074  | 0.001925786 |
| ENSG00000131969 | 34.1708966  | -1.736525008 | 0.560198713 | -3.099837555 | 0.001936268 |
| ENSG00000185551 | 2926.334304 | -1.507915529 | 0.486527715 | -3.099341483 | 0.001939513 |
| ENSG00000272056 | 9.629807434 | 3.139239474  | 1.01288553  | 3.09930331   | 0.001939763 |
| ENSG00000066135 | 3642.775994 | 1.148902918  | 0.370814175 | 3.098325241  | 0.001946177 |
| ENSG00000110060 | 687.8232227 | 1.120441618  | 0.361789558 | 3.096942946  | 0.001955275 |
| ENSG00000139722 | 3622.825838 | 0.945921575  | 0.305673108 | 3.094552804  | 0.001971098 |
| ENSG00000245680 | 543.0916099 | 1.098313605  | 0.35498656  | 3.093958275  | 0.001975053 |
| ENSG00000242439 | 10.77915463 | 4.390434158  | 1.419141326 | 3.093725817  | 0.001976601 |
| ENSG00000128059 | 2533.194912 | -1.047646671 | 0.338703259 | -3.093110685 | 0.001980702 |
| ENSG00000165912 | 1291.195022 | -1.271481606 | 0.41115973  | -3.092427378 | 0.001985268 |
| ENSG00000155254 | 1025.371792 | -1.756102824 | 0.567924954 | -3.092138869 | 0.001987199 |
| ENSG00000123374 | 2370.25766  | -1.11132121  | 0.359421564 | -3.091971438 | 0.00198832  |
| ENSG00000188523 | 31.74307354 | -2.024479861 | 0.654798928 | -3.091758056 | 0.00198975  |

|                 |             |              |             |              |             |
|-----------------|-------------|--------------|-------------|--------------|-------------|
| ENSG00000116984 | 1565.241544 | -1.665554832 | 0.538734386 | -3.091606694 | 0.001990764 |
| ENSG00000204592 | 7151.964762 | 0.871636959  | 0.28198475  | 3.091078366  | 0.00199431  |
| ENSG00000136718 | 2654.958738 | -0.904596512 | 0.292656123 | -3.090987822 | 0.001994918 |
| ENSG00000250802 | 73.35947305 | 1.460880195  | 0.472669266 | 3.090702735  | 0.001996834 |
| ENSG00000169016 | 2039.002471 | 1.082343782  | 0.35033839  | 3.089423867  | 0.002005451 |
| ENSG00000136104 | 532.7592596 | -1.253048711 | 0.405674582 | -3.088802621 | 0.002009649 |
| ENSG00000196712 | 2676.914252 | 1.128609443  | 0.365432578 | 3.088420443  | 0.002012236 |
| ENSG00000240280 | 71.14849288 | -2.031248815 | 0.657761942 | -3.08812153  | 0.002014261 |
| ENSG00000112511 | 3042.15407  | 1.329749226  | 0.430677961 | 3.087572026  | 0.002017989 |
| ENSG00000198890 | 255.4229264 | -1.068739714 | 0.346171724 | -3.087310833 | 0.002019763 |
| ENSG00000185499 | 75.0738465  | -1.769777401 | 0.573278244 | -3.087117677 | 0.002021076 |
| ENSG00000089820 | 1044.682717 | -1.979056151 | 0.641079741 | -3.087067061 | 0.00202142  |
| ENSG00000154316 | 5.426896369 | 5.909406504  | 1.914286017 | 3.08700291   | 0.002021856 |
| ENSG00000065150 | 10231.45455 | -1.012052108 | 0.327910874 | -3.086363367 | 0.00202621  |
| ENSG00000187187 | 81.55150617 | 1.711151098  | 0.554574612 | 3.085520074  | 0.002031965 |
| ENSG00000178814 | 691.5184127 | -1.212979039 | 0.393140446 | -3.085358047 | 0.002033072 |
| ENSG00000231721 | 398.0974267 | 1.298289219  | 0.420852531 | 3.084902963  | 0.002036186 |
| ENSG00000114354 | 8461.127151 | 1.048877784  | 0.340007886 | 3.084863106  | 0.002036459 |
| ENSG00000101220 | 1493.371142 | -1.786937811 | 0.579307472 | -3.084610329 | 0.00203819  |
| ENSG00000168826 | 345.7101046 | 1.346000362  | 0.436461741 | 3.083890833  | 0.002043126 |
| ENSG00000172935 | 15.34013698 | -2.956252247 | 0.958613875 | -3.08388218  | 0.002043185 |
| ENSG00000110931 | 1901.91285  | -1.248451249 | 0.404847708 | -3.083755259 | 0.002044057 |
| ENSG00000162924 | 679.6619189 | 1.078345277  | 0.349828344 | 3.082498301  | 0.002052709 |
| ENSG00000213853 | 1082.650122 | -1.326288655 | 0.43032869  | -3.082036324 | 0.002055897 |
| ENSG00000157741 | 2508.644236 | 0.95739185   | 0.310683086 | 3.081570553  | 0.002059117 |
| ENSG00000226329 | 35.07274139 | 1.813749508  | 0.588584522 | 3.081544691  | 0.002059296 |
| ENSG00000234841 | 6.545815673 | 5.1881909    | 1.683660663 | 3.081494398  | 0.002059644 |
| ENSG00000022840 | 6550.942432 | 1.20882489   | 0.392299478 | 3.081382866  | 0.002060415 |
| ENSG00000222881 | 5.684811797 | -4.954463311 | 1.6080645   | -3.081010315 | 0.002062995 |
| ENSG00000167799 | 146.5687774 | -2.382038614 | 0.773163153 | -3.08090033  | 0.002063757 |
| ENSG00000150457 | 2014.369943 | 1.354601793  | 0.439880652 | 3.079475731  | 0.002073653 |
| ENSG00000125089 | 642.1814489 | 1.201316538  | 0.390148159 | 3.079129066  | 0.002076067 |
| ENSG00000131828 | 2821.118377 | -0.996007215 | 0.323474514 | -3.079090228 | 0.002076338 |
| ENSG00000198018 | 1046.764146 | 1.217894794  | 0.395572086 | 3.078818846  | 0.00207823  |
| ENSG00000116353 | 759.7768288 | -1.322963946 | 0.429923213 | -3.077209852 | 0.002089481 |
| ENSG00000239900 | 2363.426277 | -1.202552206 | 0.390804936 | -3.07711622  | 0.002090138 |
| ENSG00000129538 | 398.2740272 | 1.364202811  | 0.443450396 | 3.076336886  | 0.002095609 |
| ENSG00000163584 | 7534.896442 | -1.045899339 | 0.339995287 | -3.076217166 | 0.002096451 |
| ENSG00000153879 | 4554.343268 | 1.003294319  | 0.32624863  | 3.075244546  | 0.0021033   |
| ENSG00000169718 | 3112.312854 | -1.198035328 | 0.389574155 | -3.075243344 | 0.002103309 |
| ENSG00000187514 | 59346.2578  | -1.537076098 | 0.499860815 | -3.075008185 | 0.002104968 |
| ENSG00000053747 | 808.9840381 | 0.802578396  | 0.261061169 | 3.074292506  | 0.002110024 |
| ENSG00000198746 | 1031.957631 | 1.893914111  | 0.616060584 | 3.074233542  | 0.002110442 |
| ENSG00000239322 | 20.50968873 | 2.49764745   | 0.812448457 | 3.07422265   | 0.002110519 |
| ENSG00000114933 | 2373.232548 | 1.356235521  | 0.441187094 | 3.074059825  | 0.002111671 |
| ENSG00000226251 | 27.32349253 | 2.516890778  | 0.818780932 | 3.07394894   | 0.002112456 |
| ENSG00000189042 | 359.3600099 | 1.142482493  | 0.371686728 | 3.073778016  | 0.002113666 |

|                 |             |              |             |              |             |
|-----------------|-------------|--------------|-------------|--------------|-------------|
| ENSG00000267501 | 10.03399398 | 3.301451699  | 1.074613379 | 3.072222776  | 0.002124711 |
| ENSG00000173991 | 63.19182901 | 1.418775282  | 0.461847077 | 3.071958996  | 0.002126589 |
| ENSG00000178773 | 3298.625056 | -2.100416015 | 0.683945833 | -3.071026846 | 0.00213324  |
| ENSG00000109814 | 4132.437603 | 0.831695409  | 0.270868418 | 3.070477592  | 0.002137167 |
| ENSG00000086730 | 606.0430607 | 1.079882979  | 0.35173535  | 3.070157657  | 0.002139458 |
| ENSG00000124134 | 20.9964382  | 2.662835417  | 0.867378477 | 3.069980968  | 0.002140724 |
| ENSG00000259319 | 38.5055442  | 1.76075829   | 0.573560433 | 3.069874052  | 0.002141491 |
| ENSG00000038210 | 1224.118576 | -1.003550186 | 0.327010526 | -3.068862024 | 0.002148758 |
| ENSG00000164338 | 1175.348691 | -0.906576287 | 0.295454381 | -3.068413756 | 0.002151984 |
| ENSG00000040608 | 587.1070523 | -1.272659652 | 0.414791815 | -3.068188923 | 0.002153604 |
| ENSG00000103154 | 19.3570639  | 2.29757772   | 0.74921072  | 3.066664233  | 0.002164619 |
| ENSG00000131848 | 312.4522278 | 1.084589754  | 0.353672817 | 3.066647204  | 0.002164742 |
| ENSG00000127311 | 690.6807224 | 1.663430544  | 0.542426446 | 3.066647203  | 0.002164742 |
| ENSG00000144815 | 1412.840364 | 1.119713939  | 0.365138539 | 3.066545488  | 0.002165479 |
| ENSG00000197903 | 1063.151471 | 1.252345239  | 0.408414614 | 3.066357558  | 0.00216684  |
| ENSG00000142208 | 4104.948848 | -1.066317013 | 0.347779738 | -3.06606998  | 0.002168925 |
| ENSG00000249459 | 227.0738715 | 1.065948093  | 0.34772691  | 3.06547484   | 0.002173247 |
| ENSG00000156042 | 514.230507  | 1.709493567  | 0.557709093 | 3.065206553  | 0.002175197 |
| ENSG00000137801 | 1884.159285 | 1.033941726  | 0.337416527 | 3.064288926  | 0.002181881 |
| ENSG00000220563 | 21.03164388 | 2.63263492   | 0.859251829 | 3.063868857  | 0.002184947 |
| ENSG00000205085 | 34.28127895 | 2.275118715  | 0.742567204 | 3.063855641  | 0.002185043 |
| ENSG00000181085 | 529.2874989 | -1.62018739  | 0.528934307 | -3.063116474 | 0.002190448 |
| ENSG00000160801 | 14.01635    | -3.284547862 | 1.072412046 | -3.06276666  | 0.00219301  |
| ENSG00000239305 | 940.7032274 | 0.983510584  | 0.321198828 | 3.06199929   | 0.00219864  |
| ENSG00000271605 | 25.64797819 | 1.849171668  | 0.604073014 | 3.061172451  | 0.002204721 |
| ENSG00000114450 | 25.09138586 | 2.305450409  | 0.753129556 | 3.061160448  | 0.002204809 |
| ENSG00000115274 | 600.5904025 | 1.171986065  | 0.382891159 | 3.060885677  | 0.002206833 |
| ENSG00000126602 | 2997.107056 | -1.638427531 | 0.535299499 | -3.060767913 | 0.002207701 |
| ENSG00000165626 | 1358.008976 | 1.076076126  | 0.351620849 | 3.060330838  | 0.002210926 |
| ENSG00000230585 | 13.21382768 | 3.313038765  | 1.082653149 | 3.060110958  | 0.00221255  |
| ENSG00000138942 | 1556.787169 | 1.051034655  | 0.343503123 | 3.05975284   | 0.002215197 |
| ENSG00000107021 | 1039.787254 | 1.116542741  | 0.364962005 | 3.059339675  | 0.002218255 |
| ENSG00000137869 | 63.44044857 | 1.756943677  | 0.574358905 | 3.058964808  | 0.002221032 |
| ENSG00000240057 | 9.973415968 | 3.638822716  | 1.189754748 | 3.058464547  | 0.002224744 |
| ENSG00000248734 | 9.99235243  | 3.624979155  | 1.185279687 | 3.058332303  | 0.002225726 |
| ENSG00000268573 | 134.8448059 | 1.552633153  | 0.507689921 | 3.058231196  | 0.002226477 |
| ENSG00000261015 | 390.5235989 | 1.881480061  | 0.615349568 | 3.057579233  | 0.002231326 |
| ENSG00000198720 | 674.0877556 | -1.406484219 | 0.460031472 | -3.05736521  | 0.00223292  |
| ENSG00000150768 | 3363.910858 | -0.814007577 | 0.26630812  | -3.056638217 | 0.002238343 |
| ENSG00000175065 | 9.16186802  | 3.4890255    | 1.141500887 | 3.056524563  | 0.002239191 |
| ENSG00000112159 | 4110.650369 | -1.051467263 | 0.344032199 | -3.056304802 | 0.002240833 |
| ENSG00000166747 | 10176.81716 | 1.341434594  | 0.438928408 | 3.056158067  | 0.00224193  |
| ENSG00000046651 | 1139.848282 | 0.939553756  | 0.307445229 | 3.056003699  | 0.002243085 |
| ENSG00000130560 | 1756.919227 | -1.139835757 | 0.373019384 | -3.055701137 | 0.002245349 |
| ENSG00000196503 | 12.44655629 | 3.436497146  | 1.124903083 | 3.054927306  | 0.002251151 |
| ENSG00000100344 | 220.6706191 | -1.191766523 | 0.390118105 | -3.054886478 | 0.002251457 |
| ENSG00000185340 | 1386.580412 | -1.048506837 | 0.343249506 | -3.05464922  | 0.002253239 |

|                 |             |              |             |              |             |
|-----------------|-------------|--------------|-------------|--------------|-------------|
| ENSG00000232630 | 87.37061626 | 2.067575389  | 0.676930923 | 3.054337332  | 0.002255583 |
| ENSG00000232520 | 5.347559697 | 5.888677244  | 1.928433527 | 3.053606548  | 0.002261084 |
| ENSG00000089916 | 5808.800934 | 0.989236016  | 0.32404724  | 3.052752479  | 0.002267529 |
| ENSG00000083093 | 465.9127289 | -1.282196835 | 0.420074683 | -3.052306857 | 0.002270898 |
| ENSG00000138363 | 3237.037483 | -1.267774983 | 0.415431237 | -3.051708371 | 0.002275431 |
| ENSG00000138678 | 3383.095824 | 1.243111946  | 0.407498667 | 3.050591443  | 0.002283911 |
| ENSG00000004487 | 7229.825932 | -0.891654537 | 0.292345144 | -3.050006316 | 0.002288366 |
| ENSG00000164062 | 4888.67897  | -1.552335229 | 0.509038427 | -3.049544291 | 0.002291888 |
| ENSG00000104419 | 22295.03633 | 1.138199697  | 0.373255683 | 3.049383433  | 0.002293116 |
| ENSG00000272630 | 75.76418256 | 2.362011523  | 0.774770063 | 3.048661319  | 0.002298635 |
| ENSG00000172660 | 8598.158544 | -0.840450799 | 0.275684082 | -3.048601106 | 0.002299095 |
| ENSG00000039523 | 1500.648192 | -0.8904584   | 0.292146784 | -3.047982896 | 0.00230383  |
| ENSG00000149499 | 2139.502666 | -1.140727247 | 0.374289965 | -3.047709944 | 0.002305924 |
| ENSG00000170364 | 220.0883118 | -1.083331802 | 0.355622304 | -3.046298807 | 0.002316775 |
| ENSG00000197858 | 1944.213974 | -0.926023488 | 0.304023179 | -3.045897655 | 0.002319868 |
| ENSG00000120616 | 1108.042304 | 1.206856464  | 0.396379298 | 3.044701047  | 0.002329117 |
| ENSG00000174669 | 1001.060864 | -1.775103927 | 0.583016881 | -3.044687015 | 0.002329226 |
| ENSG00000182685 | 130.2102067 | -1.20434873  | 0.395579865 | -3.044514738 | 0.00233056  |
| ENSG00000104518 | 1755.236346 | -1.53667503  | 0.504738881 | -3.044495061 | 0.002330713 |
| ENSG00000256269 | 1329.451612 | -1.04293433  | 0.342578038 | -3.04437008  | 0.002331681 |
| ENSG00000099284 | 1252.976601 | -1.084540084 | 0.356289382 | -3.043986542 | 0.002334656 |
| ENSG00000261884 | 42.14324235 | -1.795554036 | 0.5899543   | -3.043547673 | 0.002338064 |
| ENSG00000259442 | 37.97953688 | 1.945004023  | 0.639155253 | 3.043085408  | 0.002341659 |
| ENSG00000014138 | 659.2710503 | -1.647591564 | 0.541485362 | -3.042725954 | 0.002344457 |
| ENSG00000214814 | 22.97011101 | 2.138410775  | 0.70288093  | 3.042351392  | 0.002347377 |
| ENSG00000176928 | 58.41873777 | 3.153178211  | 1.03648928  | 3.04217156   | 0.00234878  |
| ENSG00000163113 | 2888.26444  | 1.237753197  | 0.406931087 | 3.041677657  | 0.002352637 |
| ENSG00000109971 | 220527.2635 | 2.076757963  | 0.683210679 | 3.039703603  | 0.002368111 |
| ENSG00000038219 | 3485.280357 | 1.178522791  | 0.387760437 | 3.039306437  | 0.002371235 |
| ENSG00000132382 | 2586.253662 | -1.571335083 | 0.517047191 | -3.03905545  | 0.002373212 |
| ENSG00000267404 | 8.27122271  | 3.974268998  | 1.30779278  | 3.038913396  | 0.002374331 |
| ENSG00000108061 | 2985.537858 | 0.856649957  | 0.281951848 | 3.038284594  | 0.002379291 |
| ENSG00000095319 | 5282.837333 | -0.957191106 | 0.315139676 | -3.037355114 | 0.002386641 |
| ENSG00000101639 | 1475.752032 | -1.063552699 | 0.350166735 | -3.037275081 | 0.002387275 |
| ENSG00000188215 | 1905.310786 | 1.251491631  | 0.412096033 | 3.036893174  | 0.002390302 |
| ENSG00000119844 | 2839.148173 | 0.829012741  | 0.272982283 | 3.036873793  | 0.002390455 |
| ENSG00000197037 | 963.5472008 | 1.221943734  | 0.402422528 | 3.036469505  | 0.002393663 |
| ENSG00000100304 | 3369.506028 | -1.609743706 | 0.530162719 | -3.036320076 | 0.00239485  |
| ENSG00000126231 | 55.60555156 | 1.56294778   | 0.514825806 | 3.035876914  | 0.002398372 |
| ENSG00000164556 | 15.55233005 | 3.032583458  | 0.998957048 | 3.035749599  | 0.002399385 |
| ENSG00000002746 | 775.3194075 | 1.524631646  | 0.502269504 | 3.035485203  | 0.00240149  |
| ENSG00000268166 | 18.01631165 | 2.256258099  | 0.743500354 | 3.034642938  | 0.002408206 |
| ENSG00000144597 | 3427.318277 | 1.279867629  | 0.421764864 | 3.034552512  | 0.002408928 |
| ENSG00000174442 | 1333.006988 | -1.244045741 | 0.410014925 | -3.034147458 | 0.002412165 |
| ENSG00000106305 | 523.9870273 | -1.343008881 | 0.442739402 | -3.033407181 | 0.002418091 |
| ENSG00000240207 | 30.92658011 | 1.983917084  | 0.654307406 | 3.032087158  | 0.002428691 |
| ENSG00000105677 | 1974.345034 | -1.115926249 | 0.368045961 | -3.032029606 | 0.002429154 |

|                 |             |              |             |              |             |
|-----------------|-------------|--------------|-------------|--------------|-------------|
| ENSG00000058799 | 1179.32516  | 1.155319956  | 0.381058492 | 3.031870387  | 0.002430435 |
| ENSG00000179388 | 410.6536889 | 1.450870065  | 0.478582514 | 3.031598571  | 0.002432625 |
| ENSG00000218896 | 7.279149954 | -4.524625065 | 1.492828877 | -3.030906714 | 0.002438206 |
| ENSG00000158480 | 912.5693286 | 1.354034494  | 0.446765427 | 3.030750395  | 0.002439468 |
| ENSG00000118655 | 635.4341242 | -1.079108293 | 0.356060944 | -3.030684242 | 0.002440003 |
| ENSG00000188487 | 18.20677945 | 2.198741842  | 0.725526386 | 3.030547042  | 0.002441112 |
| ENSG00000162595 | 83.91194324 | 1.354255696  | 0.446875129 | 3.030501381  | 0.002441481 |
| ENSG00000188996 | 13.46112357 | 3.367805266  | 1.111397302 | 3.030244233  | 0.002443561 |
| ENSG00000174485 | 1233.384019 | 1.034814075  | 0.341565355 | 3.029622468  | 0.002448596 |
| ENSG00000112078 | 3537.777369 | 0.936019078  | 0.309040053 | 3.028795355  | 0.002455309 |
| ENSG00000115998 | 614.201383  | 1.150630114  | 0.379903112 | 3.028746215  | 0.002455709 |
| ENSG00000262251 | 92.36384973 | 1.805673188  | 0.596180917 | 3.028733362  | 0.002455811 |
| ENSG00000269979 | 93.92968546 | -1.342305522 | 0.443267661 | -3.028205395 | 0.002460108 |
| ENSG00000116584 | 4312.98583  | 0.938234908  | 0.309862181 | 3.027910363  | 0.002462511 |
| ENSG00000073578 | 4300.812895 | -0.952881145 | 0.314719659 | -3.027714086 | 0.002464111 |
| ENSG00000116299 | 135.4229244 | 1.86165276   | 0.615160258 | 3.026289059  | 0.002475755 |
| ENSG00000141150 | 14.34400539 | 3.940697995  | 1.302373929 | 3.025780775  | 0.00247992  |
| ENSG00000198855 | 399.0515019 | 0.941673908  | 0.31123819  | 3.025573138  | 0.002481624 |
| ENSG00000235513 | 25.77229529 | 2.464063847  | 0.814416766 | 3.025556385  | 0.002481761 |
| ENSG00000214026 | 1022.296519 | -0.953429713 | 0.315209569 | -3.024748638 | 0.002488398 |
| ENSG00000259630 | 17.16319308 | 2.824180291  | 0.934060803 | 3.023550804  | 0.002498271 |
| ENSG00000115241 | 6167.667769 | -0.890078525 | 0.294392478 | -3.023441803 | 0.002499171 |
| ENSG00000108384 | 1295.832794 | -1.09811358  | 0.363239865 | -3.02310866  | 0.002501924 |
| ENSG00000270109 | 11.37845844 | -2.762390265 | 0.914068401 | -3.02208266  | 0.00251042  |
| ENSG00000263002 | 153.0610677 | 1.533888072  | 0.507634135 | 3.021640914  | 0.002514086 |
| ENSG00000135519 | 1193.033167 | -1.897464981 | 0.628099632 | -3.020961781 | 0.002519732 |
| ENSG00000096060 | 2546.02946  | -1.043975283 | 0.345663709 | -3.020205057 | 0.002526036 |
| ENSG00000197766 | 760.7691946 | -1.785065394 | 0.591127557 | -3.019763456 | 0.002529722 |
| ENSG00000243601 | 7.873421952 | 4.675250592  | 1.549236348 | 3.0177775    | 0.002546358 |
| ENSG00000006062 | 1168.593927 | 1.198917369  | 0.397391421 | 3.016968423  | 0.002553164 |
| ENSG00000130402 | 17789.08726 | -0.93610058  | 0.310286682 | -3.016889331 | 0.00255383  |
| ENSG00000117139 | 3349.472113 | 1.493579866  | 0.49510895  | 3.016669088  | 0.002555686 |
| ENSG00000035687 | 1672.190927 | -1.024137727 | 0.339517971 | -3.016446296 | 0.002557565 |
| ENSG00000125630 | 2294.508934 | -1.296562376 | 0.429845515 | -3.016345016 | 0.00255842  |
| ENSG00000086065 | 4650.877865 | 1.195709516  | 0.396564173 | 3.015172824  | 0.002568329 |
| ENSG00000167515 | 1344.521462 | -0.933350028 | 0.309620194 | -3.014499854 | 0.002574033 |
| ENSG00000263648 | 4.25216002  | 5.563135374  | 1.846121645 | 3.013417556  | 0.002583232 |
| ENSG00000197256 | 1620.349322 | -1.69006969  | 0.560869474 | -3.013303038 | 0.002584207 |
| ENSG00000157870 | 792.3759802 | -1.725723516 | 0.572744353 | -3.013078184 | 0.002586123 |
| ENSG00000139292 | 15.7820931  | 3.937785164  | 1.307019511 | 3.012797538  | 0.002588515 |
| ENSG00000004866 | 747.2505568 | 1.347381421  | 0.447236578 | 3.012681624  | 0.002589504 |
| ENSG00000139597 | 93.30304332 | 2.589395005  | 0.859779475 | 3.011696696  | 0.00259792  |
| ENSG00000231738 | 20.24784513 | 2.59744038   | 0.862530849 | 3.011417367  | 0.002600312 |
| ENSG00000228679 | 7.359391336 | 4.476919191  | 1.486787009 | 3.011136878  | 0.002602715 |
| ENSG00000163874 | 711.684283  | 1.209045159  | 0.401573283 | 3.010770914  | 0.002605854 |
| ENSG00000204256 | 19392.67412 | 1.234654869  | 0.41010227  | 3.01060238   | 0.0026073   |
| ENSG00000145777 | 56.51326206 | 2.119183504  | 0.703991983 | 3.010238119  | 0.00261043  |

|                 |             |              |             |              |             |
|-----------------|-------------|--------------|-------------|--------------|-------------|
| ENSG00000112787 | 3343.750986 | -1.071107726 | 0.355866765 | -3.009856023 | 0.002613716 |
| ENSG00000011478 | 492.4437259 | -1.130681896 | 0.375697103 | -3.009557133 | 0.002616289 |
| ENSG00000169118 | 2335.156378 | 0.975308233  | 0.324202251 | 3.008332702  | 0.002626854 |
| ENSG00000165752 | 571.0483846 | -1.335886176 | 0.444144039 | -3.00777689  | 0.002631663 |
| ENSG00000210082 | 342587.0409 | 0.936335592  | 0.311336208 | 3.007474133  | 0.002634285 |
| ENSG00000112406 | 1677.184843 | 0.893589396  | 0.29722046  | 3.006486825  | 0.002642855 |
| ENSG00000197324 | 5485.696383 | 0.91121366   | 0.30309992  | 3.006314424  | 0.002644354 |
| ENSG00000178971 | 1638.840388 | -0.911407791 | 0.30321345  | -3.005829036 | 0.002648579 |
| ENSG00000243696 | 23.93228768 | -1.946106945 | 0.647505406 | -3.005545478 | 0.002651049 |
| ENSG00000100075 | 3232.991205 | -1.095649388 | 0.364747808 | -3.003854623 | 0.002665827 |
| ENSG00000173137 | 414.1729965 | -1.462472314 | 0.487017901 | -3.002912854 | 0.00267409  |
| ENSG00000143013 | 1686.145508 | 1.106409304  | 0.368477909 | 3.002647583  | 0.002676422 |
| ENSG00000161395 | 198.7853331 | -1.116749747 | 0.371948937 | -3.002427583 | 0.002678357 |
| ENSG00000138031 | 1214.232167 | -1.332085873 | 0.443746584 | -3.001906768 | 0.002682943 |
| ENSG00000099821 | 3639.095269 | -1.022133215 | 0.34059083  | -3.00105911  | 0.002690423 |
| ENSG00000260942 | 152.1410067 | 1.424075586  | 0.47455331  | 3.000875889  | 0.002692043 |
| ENSG00000236165 | 7.732323522 | 5.427799566  | 1.808924598 | 3.000567063  | 0.002694774 |
| ENSG00000130487 | 17.00078748 | 3.313853838  | 1.104496311 | 3.000330381  | 0.002696869 |
| ENSG00000117152 | 50.57695626 | 2.321506607  | 0.774156626 | 2.998755714  | 0.002710846 |
| ENSG00000071243 | 675.8745768 | 0.894738805  | 0.298416542 | 2.998288232  | 0.002715008 |
| ENSG00000043355 | 995.2131697 | -1.141288972 | 0.38066664  | -2.998132356 | 0.002716397 |
| ENSG00000169738 | 2789.394356 | -0.987359119 | 0.329352493 | -2.997879592 | 0.002718651 |
| ENSG00000160712 | 1318.925774 | 1.752218995  | 0.584523187 | 2.997689456  | 0.002720347 |
| ENSG00000147050 | 1928.075627 | 1.146646872  | 0.38254502  | 2.997416801  | 0.002722782 |
| ENSG00000100324 | 911.6701164 | -0.953220102 | 0.318026387 | -2.997298781 | 0.002723836 |
| ENSG00000183778 | 389.5002042 | 1.122244118  | 0.37452467  | 2.996449122  | 0.002731438 |
| ENSG00000171617 | 1946.353513 | -1.58404317  | 0.528640964 | -2.996444235 | 0.002731482 |
| ENSG00000147255 | 156.8025861 | 1.428848504  | 0.477000257 | 2.995487913  | 0.002740062 |
| ENSG00000152223 | 2032.628938 | 1.370192529  | 0.457458503 | 2.995228029  | 0.002742397 |
| ENSG00000106991 | 59.469067   | -1.403105429 | 0.468454716 | -2.995178364 | 0.002742844 |
| ENSG00000110619 | 6154.673432 | 0.976964614  | 0.326238542 | 2.99463273   | 0.002747755 |
| ENSG00000235559 | 10.41267503 | -3.157817234 | 1.05463575  | -2.994225478 | 0.002751425 |
| ENSG00000110422 | 3442.18828  | 1.07124715   | 0.357814617 | 2.993860783  | 0.002754716 |
| ENSG00000131375 | 1864.694753 | 0.839356599  | 0.280436574 | 2.993035417  | 0.002762177 |
| ENSG00000140854 | 1038.872663 | -0.80055909  | 0.267506796 | -2.992668231 | 0.002765502 |
| ENSG00000154781 | 1055.595826 | 0.987471693  | 0.330005026 | 2.992292893  | 0.002768905 |
| ENSG00000085433 | 1369.868908 | 1.255528195  | 0.41973625  | 2.991231268  | 0.00277855  |
| ENSG00000126457 | 7522.120738 | -1.189477332 | 0.397745757 | -2.990546879 | 0.002784784 |
| ENSG00000214063 | 702.3568514 | -1.130801839 | 0.378193622 | -2.990007691 | 0.002789704 |
| ENSG00000101294 | 6157.545424 | 0.894626725  | 0.299355088 | 2.988513511  | 0.002803381 |
| ENSG00000253251 | 126.7913924 | 1.34564531   | 0.450330151 | 2.988130615  | 0.002806896 |
| ENSG00000269947 | 32.95461051 | -2.26659215  | 0.758578424 | -2.987947033 | 0.002808582 |
| ENSG00000224080 | 42.56361361 | 2.522804288  | 0.844399633 | 2.98768994   | 0.002810946 |
| ENSG00000232611 | 60.19848369 | -1.896015349 | 0.634893322 | -2.986352643 | 0.002823269 |
| ENSG00000164402 | 2041.038128 | -1.085099249 | 0.363363721 | -2.986261932 | 0.002824106 |
| ENSG00000188677 | 655.1092636 | -1.511511522 | 0.506159823 | -2.986233702 | 0.002824367 |
| ENSG00000128626 | 1420.413166 | -0.939675552 | 0.314774427 | -2.985234729 | 0.002833608 |

|                 |             |              |             |              |             |
|-----------------|-------------|--------------|-------------|--------------|-------------|
| ENSG00000263006 | 42.68376965 | 2.234807551  | 0.748782992 | 2.984586422  | 0.00283962  |
| ENSG00000105085 | 623.079545  | 1.258394936  | 0.42163505  | 2.984559602  | 0.002839869 |
| ENSG00000260792 | 15.25919866 | 2.673978271  | 0.896122807 | 2.983941766  | 0.002845609 |
| ENSG00000091010 | 13.92002315 | 3.295950794  | 1.104578606 | 2.983898816  | 0.002846009 |
| ENSG00000206549 | 6.499798009 | 4.270920798  | 1.431381109 | 2.983776138  | 0.00284715  |
| ENSG00000136261 | 2539.784377 | -1.140981313 | 0.382557174 | -2.982511872 | 0.002858936 |
| ENSG00000040275 | 1048.445449 | -1.345394835 | 0.451183358 | -2.98192478  | 0.002864424 |
| ENSG00000127585 | 1507.888657 | -1.221445983 | 0.409624505 | -2.981867463 | 0.00286496  |
| ENSG00000197181 | 52.7559158  | 1.944314346  | 0.652169851 | 2.981300567  | 0.002870269 |
| ENSG00000108798 | 8.213162355 | 3.597826553  | 1.20681689  | 2.981253066  | 0.002870715 |
| ENSG00000185813 | 1398.891215 | -1.432928651 | 0.480701614 | -2.980910839 | 0.002873925 |
| ENSG00000115875 | 4825.143499 | -0.815778721 | 0.273701386 | -2.980542898 | 0.002877379 |
| ENSG00000175137 | 3352.614849 | 1.392938423  | 0.467389575 | 2.980251373  | 0.002880119 |
| ENSG00000179431 | 362.877339  | -2.039076589 | 0.684405737 | -2.979338833 | 0.002888711 |
| ENSG00000263293 | 14.37313109 | 2.867905363  | 0.96280503  | 2.978697942  | 0.00289476  |
| ENSG00000272462 | 65.13641453 | 1.350262692  | 0.453325411 | 2.978572696  | 0.002895943 |
| ENSG00000005206 | 1367.906171 | -1.220095588 | 0.410033668 | -2.975598549 | 0.002924174 |
| ENSG00000068878 | 8831.693414 | 1.276312656  | 0.428955487 | 2.9753965    | 0.002926101 |
| ENSG00000162819 | 2755.898098 | 0.897289048  | 0.301579834 | 2.975295247  | 0.002927067 |
| ENSG00000234684 | 341.6846929 | 1.223691117  | 0.411338802 | 2.974898337  | 0.002930857 |
| ENSG00000172738 | 37.7791157  | 1.837343655  | 0.617667158 | 2.97465007   | 0.002933229 |
| ENSG00000137364 | 2017.911027 | 0.877846876  | 0.295156283 | 2.974176488  | 0.002937761 |
| ENSG00000186814 | 1216.055197 | 1.004035111  | 0.337662218 | 2.973489653  | 0.002944343 |
| ENSG00000183260 | 129.3591027 | 2.264027452  | 0.761432742 | 2.973378117  | 0.002945414 |
| ENSG00000251059 | 6.570659287 | 4.306287616  | 1.448513141 | 2.972902002  | 0.002949986 |
| ENSG00000103319 | 1545.465812 | -1.372583161 | 0.46170796  | -2.972838417 | 0.002950597 |
| ENSG00000133112 | 59956.80417 | 1.018947277  | 0.342793282 | 2.972483214  | 0.002954014 |
| ENSG00000108590 | 473.4546054 | 1.539990446  | 0.51814074  | 2.972146999  | 0.002957251 |
| ENSG00000255103 | 559.705609  | -1.590396683 | 0.535111926 | -2.972082302 | 0.002957874 |
| ENSG00000188295 | 486.8390493 | 1.410207195  | 0.474556813 | 2.971629861  | 0.002962236 |
| ENSG00000075303 | 912.6377848 | -1.216578408 | 0.409404163 | -2.971582895 | 0.002962689 |
| ENSG00000143384 | 16164.91946 | 1.135832207  | 0.382370297 | 2.970503242  | 0.002973123 |
| ENSG00000260276 | 52.45902296 | 1.349470174  | 0.454293205 | 2.970482851  | 0.00297332  |
| ENSG00000171282 | 1763.679302 | -1.385241044 | 0.466615923 | -2.968696468 | 0.002990659 |
| ENSG00000123213 | 2855.00963  | -1.094077022 | 0.368545638 | -2.968633761 | 0.002991269 |
| ENSG00000142207 | 2421.670481 | -1.276220755 | 0.429909321 | -2.968581262 | 0.00299178  |
| ENSG00000100314 | 40.46410937 | 1.836823444  | 0.618808834 | 2.968321303  | 0.002994312 |
| ENSG00000167380 | 798.7703268 | 1.202962797  | 0.405361937 | 2.967626432  | 0.003001088 |
| ENSG00000154309 | 653.8511005 | 1.312511998  | 0.44228553  | 2.967567121  | 0.003001667 |
| ENSG00000166478 | 1632.10947  | 0.991836081  | 0.334233935 | 2.967490661  | 0.003002414 |
| ENSG00000123600 | 1009.809534 | -1.353575877 | 0.456161298 | -2.967318539 | 0.003004096 |
| ENSG00000125945 | 1110.498359 | 1.097633329  | 0.370049343 | 2.966180995  | 0.00301523  |
| ENSG00000115194 | 838.1725952 | -0.89524785  | 0.301916124 | -2.965220398 | 0.003024662 |
| ENSG00000139618 | 640.0974262 | -1.093755042 | 0.368893144 | -2.964964407 | 0.00302718  |
| ENSG00000188938 | 1335.463882 | 0.841425137  | 0.283860962 | 2.964215757  | 0.003034554 |
| ENSG00000260190 | 27.67303536 | 2.53932514   | 0.856790476 | 2.963764435  | 0.003039008 |
| ENSG00000102001 | 8.18898104  | 3.899378465  | 1.315713357 | 2.963699079  | 0.003039654 |



|                 |             |              |             |              |             |
|-----------------|-------------|--------------|-------------|--------------|-------------|
| ENSG00000116752 | 2938.499058 | 1.382551651  | 0.466520783 | 2.963537106  | 0.003041254 |
| ENSG00000267350 | 749.6846804 | 1.355116403  | 0.45735924  | 2.962914673  | 0.00304741  |
| ENSG00000166579 | 2983.028892 | 1.2037602    | 0.406336772 | 2.96246927   | 0.003051823 |
| ENSG00000127084 | 142.21557   | -1.66741333  | 0.562856373 | -2.96241352  | 0.003052375 |
| ENSG00000099889 | 1230.584897 | -1.008421322 | 0.340601287 | -2.960709073 | 0.003069317 |
| ENSG00000175518 | 15.2884537  | 2.333021826  | 0.788001906 | 2.960680435  | 0.003069603 |
| ENSG00000138032 | 2635.212678 | 1.179900415  | 0.398551782 | 2.960469547  | 0.003071705 |
| ENSG00000125812 | 1426.053737 | 0.762053773  | 0.257455409 | 2.959944701  | 0.003076943 |
| ENSG00000149257 | 5312.110413 | 1.557330589  | 0.526180529 | 2.959688744  | 0.0030795   |
| ENSG00000262202 | 27.61053323 | 2.001354483  | 0.676398182 | 2.958840718  | 0.003087987 |
| ENSG00000228519 | 32.85225719 | -2.768790903 | 0.935899143 | -2.958428717 | 0.003092117 |
| ENSG00000105552 | 1337.476541 | -1.129017871 | 0.381647382 | -2.958274898 | 0.003093661 |
| ENSG00000165689 | 2339.196302 | -1.616354598 | 0.546412636 | -2.958120827 | 0.003095208 |
| ENSG00000055609 | 4452.587534 | 1.103588959  | 0.373174007 | 2.957303934  | 0.00310342  |
| ENSG00000187713 | 903.9052169 | -1.098769216 | 0.371686227 | -2.95617415  | 0.003114812 |
| ENSG00000156886 | 34.63050119 | 2.136371103  | 0.722711564 | 2.956049425  | 0.003116072 |
| ENSG00000184811 | 4.089441176 | 5.502169174  | 1.862003085 | 2.954973179  | 0.003126962 |
| ENSG00000125450 | 2871.114785 | -1.113078866 | 0.376885352 | -2.953361972 | 0.003143331 |
| ENSG00000129518 | 1360.751334 | 0.956080282  | 0.32372755  | 2.953348521  | 0.003143468 |
| ENSG00000183598 | 11.694523   | 3.930593725  | 1.331072123 | 2.95295323   | 0.003147496 |
| ENSG00000148840 | 4543.616026 | -0.946323754 | 0.320532604 | -2.952347878 | 0.003153674 |
| ENSG00000131023 | 2620.82446  | 1.097334717  | 0.371822361 | 2.95123379   | 0.003165072 |
| ENSG00000059122 | 3855.711833 | 1.053471918  | 0.356965489 | 2.95118702   | 0.003165552 |
| ENSG00000100554 | 2384.720904 | 1.199143479  | 0.406337922 | 2.951099106  | 0.003166453 |
| ENSG00000068308 | 3070.756962 | 1.04003514   | 0.352509539 | 2.950374459  | 0.00317389  |
| ENSG00000141298 | 2307.418504 | 1.215410847  | 0.411957002 | 2.950334237  | 0.003174303 |
| ENSG00000189045 | 77.25245737 | 1.672417686  | 0.566958381 | 2.949806794  | 0.003179727 |
| ENSG00000158406 | 22.9006128  | 2.620118897  | 0.888314565 | 2.949539499  | 0.003182479 |
| ENSG00000128607 | 3269.974555 | 0.962075126  | 0.326196723 | 2.949370911  | 0.003184216 |
| ENSG00000130513 | 16706.89267 | 2.018161756  | 0.684338025 | 2.949071487  | 0.003187302 |
| ENSG00000138835 | 2239.264013 | 1.204530115  | 0.408500411 | 2.948663161  | 0.003191516 |
| ENSG00000131584 | 1181.371529 | -1.408794597 | 0.477921919 | -2.947750541 | 0.003200953 |
| ENSG00000037749 | 2387.419648 | 1.100000811  | 0.37321942  | 2.947330049  | 0.003205309 |
| ENSG00000031691 | 401.8541656 | -1.270142371 | 0.430987549 | -2.947051195 | 0.003208201 |
| ENSG00000175155 | 792.7922812 | 1.277836038  | 0.433613978 | 2.946943833  | 0.003209315 |
| ENSG00000166938 | 1081.087059 | -1.011894707 | 0.343403357 | -2.946665154 | 0.003212208 |
| ENSG00000109756 | 3160.14208  | 1.132768699  | 0.384432844 | 2.94659709   | 0.003212915 |
| ENSG00000263624 | 20.50078469 | 2.577402094  | 0.874821637 | 2.946202958  | 0.003217012 |
| ENSG00000214694 | 11.87105273 | 2.737453924  | 0.929263005 | 2.945833322  | 0.003220859 |
| ENSG00000083828 | 224.4217805 | 1.370405452  | 0.465469361 | 2.94413675   | 0.003238569 |
| ENSG00000251615 | 122.2401771 | 1.412551387  | 0.479879205 | 2.943556153  | 0.00324465  |
| ENSG00000165661 | 2688.672277 | -0.987145657 | 0.335408656 | -2.943113244 | 0.003249295 |
| ENSG00000105968 | 4536.414425 | -0.790549531 | 0.268647502 | -2.942701959 | 0.003253615 |
| ENSG00000181585 | 61.38929724 | 1.741671342  | 0.591881002 | 2.942603895  | 0.003254646 |
| ENSG00000268205 | 1508.667297 | 0.925461831  | 0.314539134 | 2.942278819  | 0.003258064 |
| ENSG00000166847 | 3606.455057 | 1.295575906  | 0.440339118 | 2.942223056  | 0.003258651 |
| ENSG00000251442 | 13.22445944 | 3.173775581  | 1.078790096 | 2.941976935  | 0.003261242 |

|                 |             |              |             |              |             |
|-----------------|-------------|--------------|-------------|--------------|-------------|
| ENSG00000137288 | 706.5358022 | -1.255370879 | 0.426806824 | -2.941309294 | 0.00326828  |
| ENSG00000137393 | 198.4595637 | 1.247713226  | 0.424294986 | 2.940673978  | 0.00327499  |
| ENSG00000237437 | 67.66050646 | 1.780650087  | 0.605708868 | 2.939778797  | 0.003284466 |
| ENSG00000163374 | 2009.747274 | 1.126311691  | 0.383133036 | 2.939740465  | 0.003284873 |
| ENSG00000171552 | 8092.785529 | -1.170355317 | 0.39820617  | -2.939068766 | 0.003292    |
| ENSG00000232712 | 32.08804044 | 1.727717929  | 0.587852866 | 2.939031224  | 0.003292399 |
| ENSG00000267510 | 45.32419802 | 1.508315196  | 0.513309001 | 2.938415639  | 0.003298944 |
| ENSG00000171388 | 21.70637788 | -2.786551545 | 0.948328777 | -2.938381302 | 0.00329931  |
| ENSG00000116761 | 783.2040554 | 0.924451132  | 0.314708416 | 2.937484625  | 0.003308866 |
| ENSG00000168256 | 1839.957395 | 0.902194015  | 0.307177918 | 2.937040598  | 0.003313607 |
| ENSG00000110324 | 189.321269  | 1.216567134  | 0.414217218 | 2.937026957  | 0.003313753 |
| ENSG00000166592 | 252.5709213 | 1.326949663  | 0.451860044 | 2.936638635  | 0.003317905 |
| ENSG00000141858 | 1764.69842  | -1.614480338 | 0.55000922  | -2.935369588 | 0.003331506 |
| ENSG00000136603 | 1959.236324 | 1.106546957  | 0.377021446 | 2.934970859  | 0.00333579  |
| ENSG00000179115 | 3261.914143 | -0.896750043 | 0.3055574   | -2.934800606 | 0.003337621 |
| ENSG00000143393 | 3612.063111 | 1.226696211  | 0.417985256 | 2.934783449  | 0.003337805 |
| ENSG00000146909 | 2052.438033 | -0.893408357 | 0.304448647 | -2.934512489 | 0.003340721 |
| ENSG00000258472 | 184.9343873 | -1.286046123 | 0.43849317  | -2.932876061 | 0.003358379 |
| ENSG00000176076 | 31.40784619 | 2.410545084  | 0.821924175 | 2.932807133  | 0.003359125 |
| ENSG00000264083 | 13.080421   | 4.060901177  | 1.385360747 | 2.931295105  | 0.00337552  |
| ENSG00000089220 | 6878.682406 | -1.118071741 | 0.381439542 | -2.931189922 | 0.003376663 |
| ENSG00000188958 | 20.46362147 | 2.357266798  | 0.804385873 | 2.9305174    | 0.00338398  |
| ENSG00000168010 | 412.130374  | -1.923850364 | 0.657005528 | -2.928210313 | 0.003409194 |
| ENSG00000188976 | 7557.019028 | -0.869347315 | 0.29689847  | -2.928096313 | 0.003410444 |
| ENSG00000011105 | 2015.603997 | 1.296565299  | 0.443032683 | 2.926568055  | 0.003427245 |
| ENSG00000164125 | 42.05072072 | -2.207448504 | 0.754303825 | -2.92647131  | 0.003428311 |
| ENSG00000184551 | 65.53453992 | 1.199149783  | 0.409781843 | 2.926312628  | 0.003430061 |
| ENSG00000256683 | 126.3478547 | 1.505142554  | 0.51448513  | 2.925531697  | 0.003438681 |
| ENSG00000050438 | 94.43524142 | -1.528747177 | 0.522565976 | -2.92546252  | 0.003439446 |
| ENSG00000166398 | 2086.904778 | 0.914471114  | 0.312602003 | 2.9253527    | 0.00344066  |
| ENSG00000095574 | 1813.635921 | 1.03163427   | 0.352665915 | 2.925245187  | 0.003441849 |
| ENSG00000099904 | 1633.985962 | -1.558287761 | 0.53277097  | -2.924873628 | 0.003445961 |
| ENSG00000147421 | 1004.513838 | 0.882646974  | 0.301796457 | 2.924643261  | 0.003448513 |
| ENSG00000165006 | 3141.439982 | 0.968414791  | 0.331156585 | 2.92434104   | 0.003451863 |
| ENSG00000065183 | 3721.34605  | -1.163474856 | 0.398009307 | -2.923235303 | 0.003464146 |
| ENSG00000147804 | 894.3168229 | -1.407908876 | 0.481690659 | -2.922848615 | 0.003468451 |
| ENSG00000124795 | 4152.012255 | -0.982609177 | 0.336208703 | -2.922616721 | 0.003471035 |
| ENSG00000099985 | 11.23118539 | 4.252432261  | 1.455038231 | 2.922557065  | 0.0034717   |
| ENSG00000173402 | 6291.535497 | -1.098649873 | 0.375997499 | -2.921960584 | 0.003478356 |
| ENSG00000068078 | 1439.606317 | -1.084472857 | 0.371172225 | -2.921751098 | 0.003480696 |
| ENSG00000180747 | 205.3308382 | 1.200344564  | 0.410894899 | 2.921293419  | 0.003485814 |
| ENSG00000183655 | 572.3036418 | 1.257237934  | 0.430390291 | 2.921157751  | 0.003487332 |
| ENSG00000177192 | 1360.926115 | -1.123287345 | 0.384552451 | -2.921025059 | 0.003488818 |
| ENSG00000144283 | 2901.411762 | -1.165421586 | 0.399117329 | -2.919997461 | 0.003500342 |
| ENSG00000155846 | 965.7722252 | -1.918140416 | 0.656950875 | -2.919762329 | 0.003502984 |
| ENSG00000169174 | 1653.782759 | -2.133963997 | 0.731017661 | -2.919168868 | 0.00350966  |
| ENSG00000186638 | 295.2446697 | -1.284590898 | 0.440087287 | -2.918945711 | 0.003512174 |

|                 |             |              |             |              |             |
|-----------------|-------------|--------------|-------------|--------------|-------------|
| ENSG00000164675 | 47.41972752 | 1.949191703  | 0.667773722 | 2.918940409  | 0.003512234 |
| ENSG00000108604 | 6374.108551 | -1.005149824 | 0.344379202 | -2.918729755 | 0.003514608 |
| ENSG00000272709 | 4.312481532 | 5.598836532  | 1.918375152 | 2.918530574  | 0.003516854 |
| ENSG00000196417 | 650.220987  | 1.39437242   | 0.477917218 | 2.917602395  | 0.003527338 |
| ENSG00000131899 | 2022.838014 | -1.393792441 | 0.477737255 | -2.917487438 | 0.003528639 |
| ENSG00000261597 | 171.1676754 | 1.700081579  | 0.582727724 | 2.91745443   | 0.003529012 |
| ENSG00000156273 | 2333.881063 | 1.013381705  | 0.347411377 | 2.916950257  | 0.003534721 |
| ENSG00000246334 | 54.45521385 | -1.366612081 | 0.468590865 | -2.916429197 | 0.003540631 |
| ENSG00000224470 | 3325.151287 | 0.994045847  | 0.340969958 | 2.915347301  | 0.003552929 |
| ENSG00000113924 | 50.15988855 | 2.301233961  | 0.789378717 | 2.915247033  | 0.003554071 |
| ENSG00000177628 | 1348.076832 | 1.566643931  | 0.537433584 | 2.915046582  | 0.003556355 |
| ENSG00000135521 | 1660.308752 | -0.971805515 | 0.333376134 | -2.915042244 | 0.003556404 |
| ENSG00000103254 | 455.5914716 | -1.625874738 | 0.557798638 | -2.914805861 | 0.003559099 |
| ENSG00000147174 | 82.85125745 | 1.719695809  | 0.590058017 | 2.914452069  | 0.003563135 |
| ENSG00000266278 | 47.62978562 | -1.775609204 | 0.609373323 | -2.913828254 | 0.003570263 |
| ENSG00000105472 | 117.0296115 | -1.434768406 | 0.492400986 | -2.913821148 | 0.003570344 |
| ENSG00000265242 | 133.0391956 | -1.080066124 | 0.370688041 | -2.913679439 | 0.003571965 |
| ENSG00000127423 | 403.1525135 | -1.121036205 | 0.38498849  | -2.911869407 | 0.003592728 |
| ENSG00000130948 | 37.22635162 | 1.911255457  | 0.656443895 | 2.911529028  | 0.003596645 |
| ENSG00000063587 | 1794.556954 | 1.059513658  | 0.363983862 | 2.910880859  | 0.003604114 |
| ENSG00000160932 | 3831.582944 | -1.23711108  | 0.425043053 | -2.910554754 | 0.003607877 |
| ENSG00000106348 | 2473.058383 | -1.02940645  | 0.353791607 | -2.909640674 | 0.003618445 |
| ENSG00000145833 | 5960.297619 | -0.993591746 | 0.341534741 | -2.909196715 | 0.003623588 |
| ENSG00000138593 | 3121.615512 | 0.988017316  | 0.339693028 | 2.908559303  | 0.003630983 |
| ENSG00000228028 | 14.59511143 | 3.134040041  | 1.077745963 | 2.907958044  | 0.003637971 |
| ENSG00000163481 | 1302.199181 | 1.354594141  | 0.465863904 | 2.907703579  | 0.003640933 |
| ENSG00000104783 | 1802.406387 | -1.687733387 | 0.580578266 | -2.906986854 | 0.003649285 |
| ENSG00000139977 | 2161.089633 | 1.070868961  | 0.368432457 | 2.906554347  | 0.003654334 |
| ENSG00000169249 | 464.241493  | 1.238716425  | 0.426216216 | 2.906309943  | 0.00365719  |
| ENSG00000166341 | 38.1864694  | 2.122326239  | 0.730252839 | 2.90628961   | 0.003657428 |
| ENSG00000115970 | 1200.578193 | -0.763212337 | 0.262646312 | -2.905855908 | 0.003662501 |
| ENSG00000134905 | 1626.284452 | -0.818902857 | 0.281824934 | -2.905714715 | 0.003664154 |
| ENSG00000230590 | 177.5462877 | 1.58650699   | 0.546001922 | 2.905680228  | 0.003664557 |
| ENSG00000099377 | 251.7146839 | -1.755559827 | 0.604242461 | -2.905389706 | 0.003667961 |
| ENSG00000176978 | 3664.749465 | -1.022886618 | 0.352073588 | -2.905320511 | 0.003668772 |
| ENSG00000075239 | 2475.398688 | -1.258746209 | 0.433285702 | -2.90511827  | 0.003671144 |
| ENSG00000139767 | 26.28023713 | 2.031927636  | 0.69950082  | 2.904825239  | 0.003674582 |
| ENSG00000253307 | 26.40933034 | 3.058058982  | 1.05286374  | 2.904515434  | 0.003678221 |
| ENSG00000073614 | 3066.567069 | 1.037337053  | 0.357163638 | 2.904374753  | 0.003679874 |
| ENSG00000160796 | 2377.226266 | -1.680528942 | 0.57869591  | -2.903993121 | 0.003684363 |
| ENSG00000145912 | 1445.410419 | -1.179607207 | 0.40624239  | -2.903702904 | 0.003687779 |
| ENSG00000140678 | 325.0948068 | 1.101320477  | 0.379291511 | 2.903625428  | 0.003688692 |
| ENSG00000185361 | 926.5279293 | -1.328543975 | 0.45754757  | -2.903619343 | 0.003688764 |
| ENSG00000175104 | 901.8491653 | 1.017033083  | 0.350272578 | 2.90354754   | 0.003689609 |
| ENSG00000225151 | 443.2251638 | 1.10022431   | 0.378964678 | 2.903237096  | 0.003693269 |
| ENSG00000152402 | 59.28159477 | 2.426678738  | 0.835933838 | 2.902955507  | 0.003696592 |
| ENSG00000167747 | 2972.15445  | -1.045158854 | 0.360070926 | -2.902647171 | 0.003700233 |

|                 |             |              |             |              |             |
|-----------------|-------------|--------------|-------------|--------------|-------------|
| ENSG00000151746 | 2288.191357 | 1.129202857  | 0.389072337 | 2.902295408  | 0.00370439  |
| ENSG00000259617 | 11.10804094 | 2.847190591  | 0.981160439 | 2.901860367  | 0.003709538 |
| ENSG00000243678 | 173.8778474 | -1.185871066 | 0.408661983 | -2.901838475 | 0.003709798 |
| ENSG00000105877 | 60.91361229 | -1.43714563  | 0.495354303 | -2.901247899 | 0.003716797 |
| ENSG00000244480 | 40.83708311 | 1.793183298  | 0.618096784 | 2.901136753  | 0.003718116 |
| ENSG00000169105 | 366.6939361 | -1.176649757 | 0.405614715 | -2.900905004 | 0.003720867 |
| ENSG00000143554 | 267.7219428 | -2.008563815 | 0.692399167 | -2.900875552 | 0.003721216 |
| ENSG00000232445 | 293.2736054 | -1.350863618 | 0.465752664 | -2.900388391 | 0.003727005 |
| ENSG00000152242 | 4107.024414 | 1.058698375  | 0.365022661 | 2.900363424  | 0.003727302 |
| ENSG00000130182 | 15.50632459 | 3.614694087  | 1.246753056 | 2.899286327  | 0.003740132 |
| ENSG00000142449 | 313.9991411 | -1.716612733 | 0.592121123 | -2.899090516 | 0.003742468 |
| ENSG00000049759 | 3325.525666 | 1.043573302  | 0.359999153 | 2.898821548  | 0.00374568  |
| ENSG00000182372 | 2007.623203 | 1.104701377  | 0.381108532 | 2.89865297   | 0.003747694 |
| ENSG00000111725 | 1210.706676 | 1.041337795  | 0.359262721 | 2.898541187  | 0.003749031 |
| ENSG00000184575 | 12570.8692  | 1.031288455  | 0.355863518 | 2.897988708  | 0.003755641 |
| ENSG00000124226 | 4016.894379 | 0.818790338  | 0.282600107 | 2.897346172  | 0.003763342 |
| ENSG00000177125 | 1433.358482 | 1.248799622  | 0.431050203 | 2.897109466  | 0.003766183 |
| ENSG00000088836 | 604.0535202 | -1.595650858 | 0.550779322 | -2.897078365 | 0.003766557 |
| ENSG00000135312 | 28.00932198 | -2.347987638 | 0.810472763 | -2.897059279 | 0.003766786 |
| ENSG00000168301 | 872.2778907 | 1.083249317  | 0.37399427  | 2.896432923  | 0.003774313 |
| ENSG00000225968 | 123.1975793 | -1.782817883 | 0.615801546 | -2.895117582 | 0.003790165 |
| ENSG00000232940 | 36.88529262 | 1.79477392   | 0.61999555  | 2.894817421  | 0.003793791 |
| ENSG00000108272 | 522.1455455 | -1.507137719 | 0.520636521 | -2.894798307 | 0.003794022 |
| ENSG00000212195 | 9.857939711 | 3.234504085  | 1.117600853 | 2.894149622  | 0.00380187  |
| ENSG00000100532 | 540.0415067 | 1.021582952  | 0.353155371 | 2.892729475  | 0.003819101 |
| ENSG00000197919 | 9.917281062 | 4.037892445  | 1.396543246 | 2.891347946  | 0.003835932 |
| ENSG00000232862 | 6.082643862 | 5.079888692  | 1.757082799 | 2.891092381  | 0.003839053 |
| ENSG00000183605 | 1396.251507 | -1.22029945  | 0.422149108 | -2.890683477 | 0.003844051 |
| ENSG00000172301 | 1112.057887 | -0.986625425 | 0.341506599 | -2.889037658 | 0.003864228 |
| ENSG00000167371 | 138.0018283 | -1.677757123 | 0.580760909 | -2.888894719 | 0.003865985 |
| ENSG00000143630 | 312.6526162 | -0.95112765  | 0.329250894 | -2.888762539 | 0.00386761  |
| ENSG00000101773 | 1862.879863 | -0.935682489 | 0.323997428 | -2.88793184  | 0.003877839 |
| ENSG00000070010 | 5531.164723 | 1.613139594  | 0.558584202 | 2.887907659  | 0.003878137 |
| ENSG00000036448 | 167.9027653 | 1.200406008  | 0.415673681 | 2.887856663  | 0.003878766 |
| ENSG00000177169 | 2646.621361 | 1.123168871  | 0.388941996 | 2.88775417   | 0.00388003  |
| ENSG00000222937 | 68.66548208 | 1.484218046  | 0.514022027 | 2.887460004  | 0.00388366  |
| ENSG00000177706 | 844.3540197 | -1.405337094 | 0.48677373  | -2.887043828 | 0.003888801 |
| ENSG00000160471 | 54.01872387 | -1.59609507  | 0.55286009  | -2.886978277 | 0.003889611 |
| ENSG00000173567 | 22.47303867 | 2.235199274  | 0.774499294 | 2.885992655  | 0.003901813 |
| ENSG00000083817 | 218.935249  | 1.267654144  | 0.439265673 | 2.885848409  | 0.003903601 |
| ENSG00000143674 | 1385.525925 | -0.837424981 | 0.290220727 | -2.885476136 | 0.003908221 |
| ENSG00000233016 | 3887.606604 | 0.900678676  | 0.312152795 | 2.885377576  | 0.003909445 |
| ENSG00000135269 | 9572.697451 | 0.932213877  | 0.323145234 | 2.884813948  | 0.00391645  |
| ENSG00000182179 | 35.01289912 | -1.696850438 | 0.588293752 | -2.884359102 | 0.003922112 |
| ENSG00000026025 | 117.1463599 | -1.582440584 | 0.548656298 | -2.8842111   | 0.003923956 |
| ENSG00000204599 | 552.6429488 | 1.06130674   | 0.368146311 | 2.882839537  | 0.003941081 |
| ENSG00000261113 | 22.78106121 | -2.245594551 | 0.779193741 | -2.88194634  | 0.00395227  |

|                 |             |              |             |              |             |
|-----------------|-------------|--------------|-------------|--------------|-------------|
| ENSG00000175768 | 216.4429247 | -1.052031911 | 0.365073271 | -2.881700732 | 0.003955352 |
| ENSG00000152409 | 2434.026521 | 0.963865916  | 0.334502676 | 2.881489407  | 0.003958005 |
| ENSG00000100600 | 3060.500443 | 0.812618755  | 0.282039702 | 2.881221153  | 0.003961376 |
| ENSG00000118418 | 1083.394126 | -1.313711546 | 0.456048593 | -2.880639403 | 0.003968694 |
| ENSG00000259884 | 23.44559591 | -3.707246063 | 1.287048086 | -2.88042545  | 0.003971389 |
| ENSG00000137185 | 851.9551152 | 1.027670924  | 0.356796041 | 2.88027558   | 0.003973277 |
| ENSG00000162734 | 4887.776913 | 1.333579647  | 0.463016996 | 2.880195887  | 0.003974282 |
| ENSG00000068001 | 938.4931555 | -1.631152067 | 0.566483576 | -2.879433994 | 0.003983897 |
| ENSG00000172748 | 325.8230112 | 1.247847415  | 0.433460576 | 2.878802561  | 0.003991882 |
| ENSG00000115520 | 2292.633461 | 0.911229272  | 0.316584578 | 2.878312256  | 0.003998092 |
| ENSG00000196584 | 755.642219  | -1.147112272 | 0.398552571 | -2.87819564  | 0.00399957  |
| ENSG00000103253 | 572.3197081 | -2.070361657 | 0.719375547 | -2.877998379 | 0.004002072 |
| ENSG00000105499 | 105.8894977 | 1.620877645  | 0.563218402 | 2.877884742  | 0.004003514 |
| ENSG00000136518 | 1649.52313  | -0.910846601 | 0.316617701 | -2.876802526 | 0.004017269 |
| ENSG00000114779 | 1448.292593 | -1.47828947  | 0.513986711 | -2.876123911 | 0.004025916 |
| ENSG00000268852 | 131.0916014 | 1.167054915  | 0.40577529  | 2.876111346  | 0.004026077 |
| ENSG00000083312 | 14837.04765 | 1.203917187  | 0.418720569 | 2.875228196  | 0.004037356 |
| ENSG00000126216 | 2040.202947 | -1.02862939  | 0.357781626 | -2.875020168 | 0.004040017 |
| ENSG00000266385 | 9.178813697 | 4.143987355  | 1.441641694 | 2.874491889  | 0.004046782 |
| ENSG00000224420 | 124.7391438 | -1.677477573 | 0.583718037 | -2.873780606 | 0.004055906 |
| ENSG00000198625 | 6274.638917 | 1.152079151  | 0.400893341 | 2.873779717  | 0.004055917 |
| ENSG00000163472 | 304.9201055 | 1.338027547  | 0.465636154 | 2.873547374  | 0.004058902 |
| ENSG00000205189 | 3020.968574 | 0.728527101  | 0.253529983 | 2.873534299  | 0.00405907  |
| ENSG00000255074 | 8.016836939 | 5.490058368  | 1.910591104 | 2.873486826  | 0.00405968  |
| ENSG00000120526 | 2202.581813 | -0.865857931 | 0.301364553 | -2.873124671 | 0.004064337 |
| ENSG00000093217 | 257.6730727 | -1.164143242 | 0.405219357 | -2.872871745 | 0.004067592 |
| ENSG00000150527 | 82.33545648 | 1.141986581  | 0.397529582 | 2.872708429  | 0.004069695 |
| ENSG00000166922 | 36.16157301 | -1.85964956  | 0.647459856 | -2.872223725 | 0.004075943 |
| ENSG00000143952 | 2134.543841 | 1.103721317  | 0.384292964 | 2.872083071  | 0.004077758 |
| ENSG00000090615 | 5437.662365 | 0.970682896  | 0.338069513 | 2.87125239   | 0.004088489 |
| ENSG00000029153 | 894.3899288 | -0.78622494  | 0.273980786 | -2.869635321 | 0.004109454 |
| ENSG00000174529 | 339.2823373 | 1.12137228   | 0.390784515 | 2.869541234  | 0.004110677 |
| ENSG00000156256 | 3779.932801 | 1.14875652   | 0.40038615  | 2.869121519  | 0.004116136 |
| ENSG00000166189 | 1103.455048 | -0.796220121 | 0.277553586 | -2.868707742 | 0.004121524 |
| ENSG00000150455 | 448.9091766 | 1.492324852  | 0.520281718 | 2.868301536  | 0.00412682  |
| ENSG00000176700 | 758.6669285 | 1.141046291  | 0.397820041 | 2.868247382  | 0.004127527 |
| ENSG00000215548 | 180.5968058 | 1.011574959  | 0.352682566 | 2.868230688  | 0.004127744 |
| ENSG00000176927 | 13.23900944 | 3.29603335   | 1.149164653 | 2.868199383  | 0.004128153 |
| ENSG00000253716 | 233.4168696 | -1.389817529 | 0.484585511 | -2.868054239 | 0.004130047 |
| ENSG00000119523 | 1971.841071 | 0.83450769   | 0.291003286 | 2.867691643  | 0.004134783 |
| ENSG00000244468 | 12.87122754 | -3.045930768 | 1.06220818  | -2.867545955 | 0.004136687 |
| ENSG00000272325 | 1037.107341 | -0.80633358  | 0.28129535  | -2.866501639 | 0.00415036  |
| ENSG00000137996 | 2704.523798 | 1.398487706  | 0.488021645 | 2.865626394  | 0.004161851 |
| ENSG00000161217 | 3285.340839 | 1.117659315  | 0.390054485 | 2.865392805  | 0.004164923 |
| ENSG00000128245 | 4472.211512 | -1.07511907  | 0.375304363 | -2.864659131 | 0.004174583 |
| ENSG00000224997 | 58.4642142  | 1.468088301  | 0.512500567 | 2.864559372  | 0.004175899 |
| ENSG00000204839 | 1415.563168 | -1.110211385 | 0.38761458  | -2.864214716 | 0.004180445 |

|                 |             |              |             |              |             |
|-----------------|-------------|--------------|-------------|--------------|-------------|
| ENSG00000174292 | 1193.166046 | 1.128360073  | 0.393973242 | 2.864052557  | 0.004182586 |
| ENSG00000207808 | 10.34856746 | 4.242000346  | 1.481160893 | 2.863969989  | 0.004183676 |
| ENSG00000120949 | 21.81604241 | 2.626252865  | 0.917293552 | 2.863045161  | 0.004195908 |
| ENSG00000255224 | 55.1771939  | 1.843590631  | 0.64393914  | 2.862988932  | 0.004196652 |
| ENSG00000146453 | 23.64181088 | 2.361135418  | 0.824869566 | 2.862434882  | 0.004203996 |
| ENSG00000240445 | 150.8681903 | 1.357330888  | 0.474205521 | 2.862326204  | 0.004205438 |
| ENSG00000162642 | 1590.346887 | 1.011982027  | 0.353595224 | 2.861978776  | 0.004210051 |
| ENSG00000167565 | 1311.997919 | 0.788943541  | 0.275729551 | 2.86129484   | 0.004219145 |
| ENSG00000175567 | 324.5013858 | -1.423516226 | 0.497515275 | -2.861251299 | 0.004219724 |
| ENSG00000175868 | 15.60816814 | 2.406444876  | 0.84104673  | 2.861249904  | 0.004219743 |
| ENSG00000265413 | 8.752202988 | 3.360171734  | 1.174416971 | 2.861140307  | 0.004221202 |
| ENSG00000231966 | 26.32315091 | 2.68695339   | 0.939184707 | 2.860942443  | 0.004223837 |
| ENSG00000171295 | 1019.171951 | 1.188361265  | 0.415514081 | 2.859978323  | 0.0042367   |
| ENSG00000066777 | 3096.761587 | 0.991703445  | 0.346793618 | 2.859635804  | 0.004241278 |
| ENSG00000178605 | 527.568908  | -1.126800172 | 0.394092422 | -2.859228215 | 0.004246731 |
| ENSG00000267919 | 24.2039398  | -1.869593152 | 0.653894902 | -2.859164594 | 0.004247583 |
| ENSG00000162971 | 959.7497336 | 0.835114513  | 0.292083837 | 2.859160309  | 0.004247641 |
| ENSG00000236438 | 130.1221624 | 1.220713926  | 0.427007326 | 2.858765766  | 0.004252927 |
| ENSG00000151135 | 3034.370398 | 0.841792794  | 0.294464024 | 2.858728827  | 0.004253422 |
| ENSG00000135045 | 440.1345297 | -1.421482152 | 0.497309467 | -2.85834525  | 0.004258568 |
| ENSG00000139793 | 3917.585829 | 0.709742905  | 0.248317869 | 2.858203104  | 0.004260476 |
| ENSG00000073803 | 1387.731736 | 0.883704629  | 0.309186516 | 2.858160309  | 0.004261051 |
| ENSG00000227693 | 51.65666023 | -2.165156784 | 0.757674544 | -2.857634325 | 0.004268119 |
| ENSG00000141696 | 945.8608024 | -1.254166939 | 0.438889227 | -2.857593359 | 0.00426867  |
| ENSG00000140265 | 1955.648462 | 1.004937985  | 0.351754653 | 2.856928764  | 0.004277618 |
| ENSG00000199032 | 5.817085802 | 6.012317781  | 2.104854731 | 2.856405096  | 0.004284681 |
| ENSG00000152240 | 773.2414061 | -1.101050551 | 0.385601372 | -2.855411393 | 0.004298111 |
| ENSG00000272327 | 18.15834123 | -2.221660639 | 0.778070481 | -2.855346262 | 0.004298993 |
| ENSG00000070785 | 511.1408772 | -0.882322586 | 0.309013122 | -2.85529165  | 0.004299732 |
| ENSG00000204237 | 721.2179235 | -1.073195119 | 0.376039431 | -2.853943048 | 0.004318027 |
| ENSG00000117697 | 902.574568  | -0.821018046 | 0.287816836 | -2.852571295 | 0.004336708 |
| ENSG00000115956 | 8.154521531 | 4.607997601  | 1.615547364 | 2.852282578  | 0.00434065  |
| ENSG00000132464 | 4.467122931 | 5.628169833  | 1.973672251 | 2.851623328  | 0.004349661 |
| ENSG00000236756 | 27.96442392 | 1.930378601  | 0.677018086 | 2.851295468  | 0.004354149 |
| ENSG00000100823 | 5175.121157 | -1.217599638 | 0.427136326 | -2.850611299 | 0.004363528 |
| ENSG00000232324 | 64.2837169  | 2.374225261  | 0.832917668 | 2.850492133  | 0.004365163 |
| ENSG00000170608 | 400.9313933 | 1.035254307  | 0.363188169 | 2.850462638  | 0.004365568 |
| ENSG00000102683 | 5.961600202 | -5.015791188 | 1.759681164 | -2.850397725 | 0.004366459 |
| ENSG00000169727 | 3589.092376 | -0.762987467 | 0.267716235 | -2.849985802 | 0.004372118 |
| ENSG00000120068 | 488.1207881 | -0.993291909 | 0.34863382  | -2.849097969 | 0.004384338 |
| ENSG00000158164 | 229.497819  | -1.771632029 | 0.622199998 | -2.847367462 | 0.004408245 |
| ENSG00000163029 | 2114.861254 | -1.167350258 | 0.409979163 | -2.847340459 | 0.004408619 |
| ENSG00000188807 | 935.980932  | -0.786997524 | 0.276419047 | -2.84711756  | 0.004411707 |
| ENSG00000155465 | 27.55005374 | 1.738704902  | 0.610798279 | 2.846610675  | 0.004418737 |
| ENSG00000149782 | 4032.178908 | -1.599365908 | 0.561973125 | -2.845982905 | 0.004427457 |
| ENSG00000249476 | 43.33401661 | 1.446538526  | 0.508280398 | 2.84594592   | 0.004427971 |
| ENSG00000143183 | 4932.096545 | 1.254550324  | 0.440872263 | 2.845609555  | 0.004432651 |

|                 |             |              |             |              |             |
|-----------------|-------------|--------------|-------------|--------------|-------------|
| ENSG00000182054 | 1484.476348 | -1.609649205 | 0.565668885 | -2.845567868 | 0.004433231 |
| ENSG00000229989 | 30.84224335 | 1.993802538  | 0.700672642 | 2.845554998  | 0.004433341 |
| ENSG00000113758 | 6178.536629 | -0.999005381 | 0.351147368 | -2.84497471  | 0.004441495 |
| ENSG00000033627 | 3904.561791 | 0.985919209  | 0.346583496 | 2.844680202  | 0.004445603 |
| ENSG00000159905 | 112.5463458 | 1.303716271  | 0.458312962 | 2.844598296  | 0.004446746 |
| ENSG00000234350 | 10.35333912 | 2.784410888  | 0.97894447  | 2.844299114  | 0.004450924 |
| ENSG00000271020 | 37.94447573 | 2.050690114  | 0.721018167 | 2.844158731  | 0.004452886 |
| ENSG00000182575 | 7.761557993 | -3.145873722 | 1.106187769 | -2.843887639 | 0.004456676 |
| ENSG00000184840 | 7876.03773  | 1.068914823  | 0.375937907 | 2.843328124  | 0.004464508 |
| ENSG00000182175 | 292.2999761 | -1.202703385 | 0.423051923 | -2.842921444 | 0.004470209 |
| ENSG00000152147 | 535.0958298 | -0.909301042 | 0.319855441 | -2.842850008 | 0.004471211 |
| ENSG00000051596 | 1074.259115 | -1.014378065 | 0.356824196 | -2.842795072 | 0.004471981 |
| ENSG00000100767 | 360.6760556 | -1.324154682 | 0.465841021 | -2.842503393 | 0.004476075 |
| ENSG00000047365 | 1547.447898 | 1.121165679  | 0.394500806 | 2.841985775  | 0.004483349 |
| ENSG00000108439 | 1176.870397 | -1.098233624 | 0.386469495 | -2.841708431 | 0.004487251 |
| ENSG00000228109 | 78.96479155 | -1.547808301 | 0.544790769 | -2.841105958 | 0.004495737 |
| ENSG00000196652 | 1799.220389 | 1.112794511  | 0.391690462 | 2.841004872  | 0.004497163 |
| ENSG00000089234 | 1742.10323  | 1.226713376  | 0.431796081 | 2.840955328  | 0.004497861 |
| ENSG00000164647 | 651.0230883 | -1.206543137 | 0.424906723 | -2.839548239 | 0.004517746 |
| ENSG00000267422 | 12.89047164 | 2.673433824  | 0.941544207 | 2.839414023  | 0.004519647 |
| ENSG00000062716 | 16202.02407 | 1.272568784  | 0.44822445  | 2.839132901  | 0.004523631 |
| ENSG00000109576 | 681.4641079 | -0.953128677 | 0.335714912 | -2.839101399 | 0.004524078 |
| ENSG00000189050 | 800.694246  | 0.87296876   | 0.307553755 | 2.838426602  | 0.004533654 |
| ENSG00000101546 | 448.8251376 | -1.907152867 | 0.67195664  | -2.838208231 | 0.004536758 |
| ENSG00000105929 | 29.42346522 | 1.958833797  | 0.690247778 | 2.837870487  | 0.004541561 |
| ENSG00000130829 | 631.8645436 | -1.401572879 | 0.494037448 | -2.836977005 | 0.004554289 |
| ENSG00000171004 | 1169.674967 | -0.931280983 | 0.328341003 | -2.83632253  | 0.004563633 |
| ENSG00000220804 | 84.95526663 | 1.239673761  | 0.43711241  | 2.836052541  | 0.004567493 |
| ENSG00000239908 | 10.08875571 | 2.843037286  | 1.002484225 | 2.835992044  | 0.004568358 |
| ENSG00000173457 | 4200.072679 | -1.437211622 | 0.506831896 | -2.835677141 | 0.004572865 |
| ENSG00000138780 | 844.6913081 | -1.055531063 | 0.372243989 | -2.835589274 | 0.004574123 |
| ENSG00000237854 | 366.1161745 | 1.412833415  | 0.4982658   | 2.835501483  | 0.00457538  |
| ENSG00000178093 | 166.5573475 | 1.212408687  | 0.42763203  | 2.835168092  | 0.004580158 |
| ENSG00000225697 | 1502.064827 | -1.004750472 | 0.354437815 | -2.834772217 | 0.004585837 |
| ENSG00000102172 | 6554.407217 | -1.056813847 | 0.372807186 | -2.834746448 | 0.004586207 |
| ENSG00000138658 | 708.7990988 | -1.220882718 | 0.430719615 | -2.834518503 | 0.00458948  |
| ENSG00000133398 | 1682.272159 | 1.267165099  | 0.447056804 | 2.83446105   | 0.004590305 |
| ENSG00000198265 | 6280.975532 | 1.052047478  | 0.371227391 | 2.833970512  | 0.004597357 |
| ENSG00000124216 | 951.330758  | 1.028281142  | 0.362845487 | 2.833936697  | 0.004597844 |
| ENSG00000261716 | 440.7378414 | 1.072827931  | 0.378602077 | 2.83365569   | 0.004601889 |
| ENSG00000088035 | 582.8508223 | -1.098642989 | 0.387913018 | -2.832189014 | 0.004623051 |
| ENSG00000228175 | 60.32847447 | 1.748095299  | 0.617266965 | 2.83199231   | 0.004625896 |
| ENSG00000004776 | 13.51279561 | 2.688952714  | 0.949585872 | 2.831710954  | 0.004629968 |
| ENSG00000179134 | 9330.195254 | 1.294505972  | 0.457182909 | 2.83148374   | 0.004633259 |
| ENSG00000106803 | 3073.619822 | 0.960718613  | 0.339319273 | 2.831311654  | 0.004635753 |
| ENSG00000132749 | 433.4084236 | -1.286758381 | 0.454502266 | -2.831137439 | 0.004638279 |
| ENSG00000177917 | 905.2543877 | -1.279546776 | 0.451967153 | -2.831061434 | 0.004639381 |

|                 |             |              |             |              |             |
|-----------------|-------------|--------------|-------------|--------------|-------------|
| ENSG00000100284 | 1031.797895 | 1.233057639  | 0.435562863 | 2.830952188  | 0.004640966 |
| ENSG00000258240 | 46.37408578 | -1.890487915 | 0.668043418 | -2.829887795 | 0.004656433 |
| ENSG00000176840 | 4.045642205 | 5.484480645  | 1.938185568 | 2.829698423  | 0.00465919  |
| ENSG00000004975 | 1894.441513 | -0.836487698 | 0.295618772 | -2.829616309 | 0.004660386 |
| ENSG00000122565 | 10309.6582  | -0.861838767 | 0.30468355  | -2.828635702 | 0.004674688 |
| ENSG00000167962 | 1418.069554 | -0.877524397 | 0.310308095 | -2.827913325 | 0.004685249 |
| ENSG00000163359 | 56.30050448 | 1.464080137  | 0.517738966 | 2.827834553  | 0.004686402 |
| ENSG00000203721 | 13.87876619 | 2.87572746   | 1.017056986 | 2.827498852  | 0.004691318 |
| ENSG00000100036 | 459.7612083 | 0.97606671   | 0.345248689 | 2.827140961  | 0.004696565 |
| ENSG00000130726 | 18000.03324 | -0.818814885 | 0.28963261  | -2.827081123 | 0.004697443 |
| ENSG00000158373 | 484.761993  | 1.37706319   | 0.487098847 | 2.827071339  | 0.004697586 |
| ENSG00000272377 | 64.91248545 | 2.477448583  | 0.876634238 | 2.826091518  | 0.004711198 |
| ENSG00000196372 | 648.2149817 | -1.710898036 | 0.60542785  | -2.825932165 | 0.004714325 |
| ENSG00000148357 | 15.58944769 | -3.21420055  | 1.137549908 | -2.825546842 | 0.004719999 |
| ENSG00000110876 | 115.4668036 | 1.808635701  | 0.640144338 | 2.825356087  | 0.00472281  |
| ENSG00000137575 | 7509.348972 | 0.952647972  | 0.337190365 | 2.825252651  | 0.004724335 |
| ENSG00000137494 | 702.5470811 | 1.134118471  | 0.401519544 | 2.824566047  | 0.004734469 |
| ENSG00000168038 | 179.3386879 | 1.260306163  | 0.446206342 | 2.824491822  | 0.004735566 |
| ENSG00000128011 | 543.0793122 | -1.224723027 | 0.433614254 | -2.824452875 | 0.004736141 |
| ENSG00000168067 | 1481.330612 | -1.169349466 | 0.414033196 | -2.824289159 | 0.004738561 |
| ENSG00000227619 | 11.37483047 | 2.81994348   | 0.998630281 | 2.823811309  | 0.004745631 |
| ENSG00000125458 | 1313.110022 | -1.188218665 | 0.42081418  | -2.823618411 | 0.004748488 |
| ENSG00000124635 | 40.87830169 | 1.527772695  | 0.541115039 | 2.823378734  | 0.00475204  |
| ENSG00000144063 | 611.1323345 | -2.210395334 | 0.782904553 | -2.823326705 | 0.004752811 |
| ENSG00000135953 | 860.0956049 | 1.026567587  | 0.36366164  | 2.822864645  | 0.004759666 |
| ENSG00000253710 | 401.1091858 | 1.15098604   | 0.407754585 | 2.822742115  | 0.004761485 |
| ENSG00000135723 | 1524.488465 | -0.906734895 | 0.321239427 | -2.822613977 | 0.004763389 |
| ENSG00000100221 | 5870.691896 | 0.962740766  | 0.341149087 | 2.822052889  | 0.004771731 |
| ENSG00000179141 | 16.33377519 | 3.284411538  | 1.163896218 | 2.821910999  | 0.004773842 |
| ENSG00000235978 | 4.754926775 | 4.707201914  | 1.668126284 | 2.821849856  | 0.004774753 |
| ENSG00000169635 | 955.2418032 | 0.919461469  | 0.325994905 | 2.820478039  | 0.004795216 |
| ENSG00000142512 | 24.01737135 | -2.777668824 | 0.984862368 | -2.820362433 | 0.004796944 |
| ENSG00000188015 | 72.56185016 | -1.642914441 | 0.582539602 | -2.820262238 | 0.004798442 |
| ENSG00000104687 | 14442.45874 | 0.916238992  | 0.325016573 | 2.819053145  | 0.004816554 |
| ENSG00000128039 | 371.6274211 | -1.250783842 | 0.443757439 | -2.818620563 | 0.004823049 |
| ENSG00000088356 | 1606.831039 | 1.342478295  | 0.476333924 | 2.818355417  | 0.004827035 |
| ENSG00000261373 | 522.4543924 | -1.109409468 | 0.393665701 | -2.818151204 | 0.004830106 |
| ENSG00000092978 | 1138.716407 | 1.151167439  | 0.40849691  | 2.818056664  | 0.004831528 |
| ENSG00000143321 | 9301.947464 | -0.993996221 | 0.352748504 | -2.817860915 | 0.004834475 |
| ENSG00000177602 | 458.9530091 | -1.382148905 | 0.490512101 | -2.817767193 | 0.004835886 |
| ENSG00000236671 | 41.28371327 | -1.41758311  | 0.503170552 | -2.817301421 | 0.004842905 |
| ENSG00000167522 | 16886.58937 | 0.902607239  | 0.320384985 | 2.817258236  | 0.004843556 |
| ENSG00000167136 | 104.9017822 | -1.428558096 | 0.507127305 | -2.816961503 | 0.004848034 |
| ENSG00000137221 | 2632.168953 | 1.119564048  | 0.397523909 | 2.816343927  | 0.004857364 |
| ENSG00000183527 | 1317.937393 | -1.060404078 | 0.376622558 | -2.815561777 | 0.004869203 |
| ENSG00000177981 | 846.4708605 | 1.107599941  | 0.393443708 | 2.81514209   | 0.004875567 |
| ENSG00000186866 | 1757.167398 | 1.004383203  | 0.356849796 | 2.814582535  | 0.004884063 |



|                 |             |              |             |              |             |
|-----------------|-------------|--------------|-------------|--------------|-------------|
| ENSG00000256299 | 8.142028578 | -3.289946239 | 1.169042165 | -2.814223762 | 0.004889518 |
| ENSG00000174514 | 88.34244939 | -1.212405895 | 0.430828441 | -2.814126875 | 0.004890992 |
| ENSG00000080823 | 448.979262  | 1.383303281  | 0.49161222  | 2.813809797  | 0.004895819 |
| ENSG00000266897 | 45.24996872 | 1.759900302  | 0.625487899 | 2.813644048  | 0.004898343 |
| ENSG00000244509 | 2148.500681 | -1.272767684 | 0.452356584 | -2.813638023 | 0.004898435 |
| ENSG00000166311 | 467.8004069 | 1.71035211   | 0.608069005 | 2.812759894  | 0.004911831 |
| ENSG00000101224 | 5228.56421  | -1.51338462  | 0.538233875 | -2.811760261 | 0.004927121 |
| ENSG00000175564 | 116.0711707 | 1.544418323  | 0.549275308 | 2.811738121  | 0.00492746  |
| ENSG00000262944 | 1088.655072 | 0.783981586  | 0.27886233  | 2.811357077  | 0.0049333   |
| ENSG00000156990 | 1298.563017 | -0.958468757 | 0.340999912 | -2.810759544 | 0.004942471 |
| ENSG00000155229 | 3129.4177   | -1.074263109 | 0.382201279 | -2.810726098 | 0.004942985 |
| ENSG00000174684 | 252.6317535 | -0.941971606 | 0.335239228 | -2.809848987 | 0.004956475 |
| ENSG00000090971 | 529.7756116 | -1.799135473 | 0.640317759 | -2.809754139 | 0.004957936 |
| ENSG00000164080 | 3422.648038 | 1.323626296  | 0.471151765 | 2.809341691  | 0.004964293 |
| ENSG00000105204 | 93.44924217 | -1.594230987 | 0.56759839  | -2.808730637 | 0.004973724 |
| ENSG00000164175 | 6.623595339 | 4.425093819  | 1.576351118 | 2.807175234  | 0.004997805 |
| ENSG00000175356 | 43.69342604 | 2.451186724  | 0.873451214 | 2.806323564  | 0.005011035 |
| ENSG00000135956 | 2968.464266 | 0.857876618  | 0.305703631 | 2.806236269  | 0.005012392 |
| ENSG00000119915 | 311.7915813 | -1.103146007 | 0.393270539 | -2.805056308 | 0.005030779 |
| ENSG00000260059 | 7.338247923 | 3.348702626  | 1.193934702 | 2.804761952  | 0.005035375 |
| ENSG00000079462 | 790.4297021 | -1.297226658 | 0.462559157 | -2.804455686 | 0.005040162 |
| ENSG00000064933 | 1182.874161 | -1.402656337 | 0.500187147 | -2.804263056 | 0.005043174 |
| ENSG00000131931 | 678.4172643 | 0.976528349  | 0.348253756 | 2.804071262  | 0.005046175 |
| ENSG00000185090 | 302.5285242 | -0.992248637 | 0.353927661 | -2.803535148 | 0.005054572 |
| ENSG00000169981 | 617.1199468 | 1.230551306  | 0.438992723 | 2.803124613  | 0.005061011 |
| ENSG00000130958 | 1685.494899 | 0.890772335  | 0.317911214 | 2.801953171  | 0.005079425 |
| ENSG00000126062 | 1667.370782 | 1.310299272  | 0.467682138 | 2.801687652  | 0.005083607 |
| ENSG00000185379 | 209.3643092 | -1.034333385 | 0.369196966 | -2.801576071 | 0.005085365 |
| ENSG00000154102 | 468.5201579 | -1.488919978 | 0.531489639 | -2.801409228 | 0.005087995 |
| ENSG00000260708 | 192.6215633 | 1.212984841  | 0.433084426 | 2.800804573  | 0.005097538 |
| ENSG00000160299 | 2133.270514 | -0.740995485 | 0.264599148 | -2.80044547  | 0.005103213 |
| ENSG00000001497 | 1688.478405 | -1.185718438 | 0.423462777 | -2.800053521 | 0.005109413 |
| ENSG00000114378 | 270.3193808 | -1.131099948 | 0.404018052 | -2.799627249 | 0.005116165 |
| ENSG00000110955 | 31437.00952 | -0.863823065 | 0.308600786 | -2.799160292 | 0.00512357  |
| ENSG00000162782 | 34.27085678 | 1.799179538  | 0.642819075 | 2.798889468  | 0.005127869 |
| ENSG00000167272 | 859.3791052 | -0.901884717 | 0.322289352 | -2.798369574 | 0.005136131 |
| ENSG00000171928 | 3066.196833 | 0.801189071  | 0.286306088 | 2.798365476  | 0.005136196 |
| ENSG00000229915 | 13.74238229 | 3.42662355   | 1.224550866 | 2.798269672  | 0.00513772  |
| ENSG00000231625 | 21.15117503 | 2.397716342  | 0.856917268 | 2.798072148  | 0.005140863 |
| ENSG00000088826 | 1309.878943 | 0.824684754  | 0.294751192 | 2.797901337  | 0.005143582 |
| ENSG00000090612 | 482.6534646 | 1.205283321  | 0.43094862  | 2.796814432  | 0.005160917 |
| ENSG00000143374 | 812.0312399 | -0.893959084 | 0.31974185  | -2.79587762  | 0.0051759   |
| ENSG00000229124 | 18.0965627  | -1.928090102 | 0.6897608   | -2.795302518 | 0.005185117 |
| ENSG00000264373 | 5.748210198 | 5.994129901  | 2.144360762 | 2.79529919   | 0.00518517  |
| ENSG00000182584 | 21.01606168 | 3.508195053  | 1.255228773 | 2.79486507   | 0.005192138 |
| ENSG00000182795 | 601.4473534 | 1.577379055  | 0.564473689 | 2.794424407  | 0.005199219 |
| ENSG00000159363 | 2290.358636 | -0.828504566 | 0.296486448 | -2.794409564 | 0.005199458 |

|                 |             |              |             |              |             |
|-----------------|-------------|--------------|-------------|--------------|-------------|
| ENSG00000174951 | 973.4404615 | 0.791199987  | 0.28330129  | 2.792786394  | 0.005225619 |
| ENSG00000010256 | 5570.340537 | -0.968630579 | 0.346834433 | -2.792775132 | 0.005225801 |
| ENSG00000156030 | 3437.84802  | 0.771569467  | 0.276349304 | 2.792007999  | 0.005238206 |
| ENSG00000179403 | 972.7348614 | -1.47869467  | 0.52964147  | -2.791878569 | 0.005240302 |
| ENSG00000197808 | 44.00006532 | 2.231720935  | 0.799462038 | 2.791528339  | 0.005245976 |
| ENSG00000113657 | 1328.514696 | -1.37181413  | 0.491423425 | -2.791511478 | 0.00524625  |
| ENSG00000148468 | 1694.198035 | -0.815733483 | 0.292318532 | -2.790563693 | 0.005261635 |
| ENSG00000204923 | 175.5991977 | 0.968665729  | 0.347148091 | 2.790353034  | 0.00526506  |
| ENSG00000119321 | 1895.557053 | 0.978102433  | 0.350542853 | 2.790250681  | 0.005266725 |
| ENSG00000133193 | 2489.22132  | 1.088757967  | 0.390252866 | 2.789878211  | 0.005272787 |
| ENSG00000125247 | 644.4393404 | -1.672575767 | 0.5995599   | -2.789672502 | 0.005276138 |
| ENSG00000107020 | 474.9889624 | -1.092026061 | 0.391458754 | -2.789632496 | 0.00527679  |
| ENSG00000137962 | 14216.10467 | -1.238330635 | 0.443959795 | -2.78928554  | 0.005282447 |
| ENSG00000165672 | 8764.681859 | -0.7807938   | 0.280000524 | -2.788544064 | 0.005294554 |
| ENSG00000205181 | 29.74830486 | 2.45196697   | 0.879324668 | 2.788466035  | 0.00529583  |
| ENSG00000248112 | 245.328377  | -1.707299141 | 0.612349899 | -2.788110432 | 0.005301647 |
| ENSG00000155252 | 2295.245762 | 1.162764964  | 0.417144589 | 2.787438681  | 0.005312651 |
| ENSG00000142677 | 120.9447072 | -1.016331055 | 0.364714441 | -2.786648785 | 0.005325616 |
| ENSG00000115365 | 3129.774399 | -0.95810141  | 0.343850608 | -2.786388592 | 0.005329894 |
| ENSG00000229953 | 525.019474  | 1.156662522  | 0.415114347 | 2.786370866  | 0.005330185 |
| ENSG00000262248 | 8.80060183  | -3.272371602 | 1.17445747  | -2.786283612 | 0.005333162 |
| ENSG00000154813 | 1493.850084 | 1.152145852  | 0.413535265 | 2.786088511  | 0.00533483  |
| ENSG00000086475 | 1928.013475 | -0.832083753 | 0.298668019 | -2.785982096 | 0.005336582 |
| ENSG00000042286 | 3102.46168  | 1.129728565  | 0.405569356 | 2.785537289  | 0.005343909 |
| ENSG00000166133 | 612.5483224 | -0.834958728 | 0.299750605 | -2.785511403 | 0.005344336 |
| ENSG00000273449 | 35.28309121 | -1.848828999 | 0.663966939 | -2.784519665 | 0.005360707 |
| ENSG00000236423 | 22.82756654 | 3.008099926  | 1.08051357  | 2.783953862  | 0.005370067 |
| ENSG00000179921 | 11.07345922 | 3.111930912  | 1.118012518 | 2.783449078  | 0.00537843  |
| ENSG00000105321 | 1726.651657 | 1.257479275  | 0.451777717 | 2.783402607  | 0.005379201 |
| ENSG00000156384 | 867.0642391 | -1.277577672 | 0.459060366 | -2.783027608 | 0.005385422 |
| ENSG00000114491 | 1307.830634 | -0.850305338 | 0.305548395 | -2.782882689 | 0.005387828 |
| ENSG00000126522 | 675.1436524 | -1.09242689  | 0.392573528 | -2.782731923 | 0.005390332 |
| ENSG00000102054 | 5470.455295 | -0.924513955 | 0.332248394 | -2.782598716 | 0.005392546 |
| ENSG00000174405 | 1171.380043 | 0.983465524  | 0.353459343 | 2.7824007    | 0.005395837 |
| ENSG00000100413 | 1249.098017 | -1.13781793  | 0.40895552  | -2.782253511 | 0.005398285 |
| ENSG00000225329 | 5.758640629 | 5.996762348  | 2.155925008 | 2.781526411  | 0.005410393 |
| ENSG00000237289 | 203.6718843 | -1.637272154 | 0.588702414 | -2.781154136 | 0.005416601 |
| ENSG00000091157 | 1004.467782 | 1.204234117  | 0.43303643  | 2.780907181  | 0.005420723 |
| ENSG00000224940 | 163.4613029 | -1.237805405 | 0.445284867 | -2.77980569  | 0.005439143 |
| ENSG00000124787 | 375.6785434 | -1.335393234 | 0.480586743 | -2.778672642 | 0.00545815  |
| ENSG00000179029 | 285.7101278 | -1.686646425 | 0.607054483 | -2.778410293 | 0.005462559 |
| ENSG00000172183 | 575.6270994 | 1.319015877  | 0.474738615 | 2.778404442  | 0.005462658 |
| ENSG00000234500 | 34.06866035 | 1.843731422  | 0.663680128 | 2.77804223   | 0.005468751 |
| ENSG00000135338 | 313.7881021 | 1.067220096  | 0.38421101  | 2.777692642  | 0.005474638 |
| ENSG00000107566 | 3396.758748 | -0.985993661 | 0.355019311 | -2.777295859 | 0.005481326 |
| ENSG00000170779 | 1637.778628 | -1.159792841 | 0.417675286 | -2.776781102 | 0.005490014 |
| ENSG00000180530 | 814.1611507 | 1.44025725   | 0.518697098 | 2.776682682  | 0.005491676 |

|                 |             |              |             |              |             |
|-----------------|-------------|--------------|-------------|--------------|-------------|
| ENSG00000156709 | 1802.589808 | -0.745385305 | 0.268447231 | -2.776654843 | 0.005492147 |
| ENSG00000116954 | 1305.520716 | 0.943534836  | 0.339823137 | 2.776546774  | 0.005493973 |
| ENSG00000115839 | 4168.986249 | 1.012385305  | 0.364625286 | 2.77650877   | 0.005494615 |
| ENSG00000188786 | 3146.292747 | 1.125526017  | 0.405384086 | 2.776443516  | 0.005495718 |
| ENSG00000110497 | 1782.188544 | 1.125395567  | 0.405586464 | 2.774736506  | 0.005524645 |
| ENSG00000204568 | 3012.098714 | -1.018923275 | 0.367223759 | -2.77466599  | 0.005525843 |
| ENSG00000135976 | 248.8653486 | -1.15292161  | 0.41554477  | -2.7744823   | 0.005528964 |
| ENSG00000106080 | 1831.101086 | 0.914840735  | 0.329740885 | 2.774423124  | 0.00552997  |
| ENSG00000141456 | 2347.332511 | -0.836480501 | 0.301600114 | -2.773475409 | 0.005546103 |
| ENSG00000108797 | 525.0441781 | -1.313758949 | 0.473691588 | -2.773447917 | 0.005546572 |
| ENSG00000180573 | 501.8042825 | 1.137284251  | 0.410140633 | 2.772912898  | 0.005555699 |
| ENSG00000196456 | 315.0893492 | -1.101313851 | 0.39718676  | -2.77278591  | 0.005557867 |
| ENSG00000113763 | 564.2029128 | -1.837397001 | 0.662668186 | -2.772725535 | 0.005558898 |
| ENSG00000117148 | 5.888061911 | -4.989965986 | 1.799779817 | -2.772542474 | 0.005562026 |
| ENSG00000132300 | 3841.861056 | -0.72326359  | 0.260939029 | -2.77177237  | 0.005575201 |
| ENSG00000100029 | 4152.869985 | -0.77284689  | 0.278867984 | -2.771371885 | 0.005582063 |
| ENSG00000175505 | 458.4169197 | 0.828122756  | 0.298835199 | 2.771168723  | 0.005585548 |
| ENSG00000250479 | 1707.255334 | -1.045573059 | 0.377375865 | -2.770641043 | 0.005594606 |
| ENSG00000131871 | 2448.802117 | 0.786010035  | 0.283706391 | 2.770505212  | 0.00559694  |
| ENSG00000064607 | 3143.44332  | -0.820961531 | 0.296389145 | -2.769877186 | 0.005607743 |
| ENSG00000184363 | 2886.037975 | -1.11415761  | 0.40225985  | -2.769745999 | 0.005610002 |
| ENSG00000164542 | 1196.925668 | 1.132210889  | 0.408782654 | 2.769713635  | 0.00561056  |
| ENSG00000106477 | 508.1135362 | -0.906076081 | 0.327188393 | -2.769279418 | 0.005618043 |
| ENSG00000168356 | 4.861847468 | 4.77174525   | 1.72311881  | 2.76924912   | 0.005618566 |
| ENSG00000187123 | 300.7893833 | -1.825136156 | 0.659215572 | -2.768648427 | 0.005628934 |
| ENSG00000083844 | 781.8874046 | 1.007810403  | 0.364008714 | 2.768643622  | 0.005629017 |
| ENSG00000185624 | 44753.78786 | 0.754538029  | 0.27253668  | 2.768574227  | 0.005630216 |
| ENSG00000204899 | 945.333225  | -1.312871685 | 0.474263988 | -2.768229757 | 0.005636171 |
| ENSG00000235351 | 10.75229344 | -3.038474142 | 1.097625446 | -2.768224948 | 0.005636254 |
| ENSG00000269069 | 77.38304223 | 1.571336597  | 0.567692466 | 2.767936321  | 0.005641248 |
| ENSG00000269501 | 16.99537782 | 2.164974394  | 0.78216914  | 2.76791078   | 0.00564169  |
| ENSG00000072849 | 1888.314761 | 0.730680282  | 0.264028272 | 2.76743197   | 0.005649984 |
| ENSG00000071894 | 4871.395471 | -1.018187139 | 0.367988712 | -2.766897752 | 0.00565925  |
| ENSG00000199053 | 29.73167046 | 1.697308781  | 0.613498651 | 2.766605562  | 0.005664324 |
| ENSG00000065883 | 2400.90784  | 0.946182099  | 0.342031506 | 2.76635948   | 0.005668601 |
| ENSG00000164190 | 4397.030526 | 1.034451449  | 0.373977604 | 2.766078602  | 0.005673486 |
| ENSG00000109099 | 1518.609717 | -0.985264421 | 0.356247961 | -2.765670347 | 0.005680593 |
| ENSG00000143476 | 1392.748493 | -1.475843091 | 0.533664334 | -2.765489462 | 0.005683744 |
| ENSG00000167680 | 3706.60963  | -1.096088159 | 0.396359224 | -2.765390821 | 0.005685463 |
| ENSG00000225969 | 19.24501929 | 1.943719387  | 0.702985912 | 2.764947852  | 0.00569319  |
| ENSG00000115084 | 767.8023815 | 0.877758209  | 0.317559729 | 2.764072802  | 0.00570848  |
| ENSG00000015532 | 1871.03267  | -0.854575762 | 0.309225979 | -2.763596269 | 0.005716823 |
| ENSG00000031003 | 1175.145115 | 1.032782079  | 0.373858646 | 2.762493498  | 0.00573617  |
| ENSG00000135926 | 6321.778866 | 1.20844622   | 0.437524328 | 2.7620092    | 0.005744686 |
| ENSG00000104361 | 673.4446802 | 0.981686675  | 0.355455859 | 2.761768161  | 0.005748928 |
| ENSG00000169598 | 525.9877708 | -0.903758396 | 0.327264102 | -2.76155677  | 0.005752651 |
| ENSG00000165171 | 313.8930738 | -1.521801766 | 0.551138189 | -2.761198181 | 0.005758972 |

|                 |             |              |             |              |             |
|-----------------|-------------|--------------|-------------|--------------|-------------|
| ENSG00000163964 | 741.4836424 | -1.102377586 | 0.399248303 | -2.761132805 | 0.005760125 |
| ENSG00000260498 | 12.63919447 | 2.970532903  | 1.076046089 | 2.760600066  | 0.005769528 |
| ENSG00000101190 | 784.8553426 | -1.175850564 | 0.425953783 | -2.760512081 | 0.005771082 |
| ENSG00000166166 | 490.2599863 | -0.879683514 | 0.318745911 | -2.759826816 | 0.005783201 |
| ENSG00000130193 | 540.804055  | -1.647938324 | 0.597143349 | -2.759703056 | 0.005785392 |
| ENSG00000079335 | 464.8951851 | 0.882386796  | 0.319791606 | 2.759255653  | 0.005793319 |
| ENSG00000162769 | 1299.526544 | -0.939288844 | 0.340546217 | -2.758183173 | 0.005812362 |
| ENSG00000022567 | 2151.186502 | 1.191225425  | 0.431945263 | 2.757815695  | 0.0058189   |
| ENSG00000139718 | 2415.103729 | 1.271799667  | 0.461175631 | 2.757733892  | 0.005820356 |
| ENSG00000169188 | 1229.011588 | -0.827448461 | 0.300063861 | -2.757574531 | 0.005823194 |
| ENSG00000135968 | 1916.495957 | 0.769136449  | 0.278925863 | 2.757494196  | 0.005824625 |
| ENSG00000173261 | 86.1541126  | 1.704953618  | 0.618304548 | 2.757465756  | 0.005825131 |
| ENSG00000165630 | 357.9385774 | 0.939750228  | 0.340907237 | 2.756615664  | 0.005840295 |
| ENSG00000103066 | 557.2976015 | 1.193112759  | 0.432985369 | 2.755549827  | 0.005859358 |
| ENSG00000183828 | 360.4859169 | -1.251804924 | 0.454436256 | -2.754632596 | 0.005875808 |
| ENSG00000143850 | 945.4407878 | 0.977475833  | 0.354850064 | 2.754616474  | 0.005876097 |
| ENSG00000269337 | 11.55017325 | 2.763108933  | 1.003098242 | 2.754574593  | 0.005876849 |
| ENSG00000157657 | 1138.977603 | -1.066701603 | 0.3872687   | -2.754422452 | 0.005879582 |
| ENSG00000135631 | 2371.922156 | 1.013619225  | 0.368076833 | 2.75382511   | 0.005890323 |
| ENSG00000269693 | 63.52751341 | 1.894982438  | 0.688272149 | 2.753245849  | 0.005900757 |
| ENSG00000010803 | 742.933646  | -1.094488205 | 0.397571346 | -2.752935333 | 0.005906356 |
| ENSG00000253420 | 18.58932906 | 3.060522113  | 1.11198001  | 2.752317563  | 0.005917511 |
| ENSG00000172361 | 245.3474756 | 1.209087512  | 0.439337901 | 2.752067393  | 0.005922033 |
| ENSG00000003096 | 231.5743311 | -1.038678394 | 0.377461361 | -2.751747601 | 0.005927819 |
| ENSG00000168876 | 657.4558536 | 0.908319512  | 0.330151185 | 2.751222938  | 0.005937322 |
| ENSG00000121064 | 2549.570793 | 1.077479132  | 0.391702064 | 2.750761949  | 0.005945683 |
| ENSG00000119231 | 3492.729682 | 1.124904471  | 0.40902244  | 2.750226787  | 0.005955403 |
| ENSG00000111581 | 2714.567351 | -1.126744981 | 0.409692771 | -2.750219334 | 0.005955539 |
| ENSG00000165030 | 3073.695332 | 1.08429949   | 0.394262599 | 2.750196168  | 0.00595596  |
| ENSG00000111490 | 898.8753542 | -0.830779859 | 0.302082253 | -2.750177647 | 0.005956296 |
| ENSG00000186432 | 7212.649709 | 1.173673433  | 0.426797202 | 2.749955785  | 0.005960331 |
| ENSG00000105202 | 6456.274203 | -0.936344714 | 0.340529099 | -2.749676069 | 0.00596542  |
| ENSG00000086289 | 1287.445537 | 1.478700918  | 0.537777105 | 2.749653908  | 0.005965824 |
| ENSG00000168268 | 2378.278277 | -1.22702169  | 0.446261748 | -2.749556049 | 0.005967606 |
| ENSG00000252759 | 8.310479847 | 3.166058156  | 1.151626368 | 2.749206032  | 0.005973982 |
| ENSG00000095564 | 5802.503759 | 0.81906359   | 0.297931555 | 2.749166967  | 0.005974694 |
| ENSG00000166681 | 1480.233377 | -1.296917638 | 0.4718189   | -2.74876152  | 0.005982089 |
| ENSG00000146872 | 3919.822127 | 0.923452824  | 0.336062755 | 2.74785828   | 0.005998593 |
| ENSG00000197548 | 975.9140619 | 1.034853618  | 0.376696836 | 2.747178951  | 0.006011033 |
| ENSG00000129353 | 3058.039629 | -0.808479062 | 0.294304937 | -2.747079508 | 0.006012856 |
| ENSG00000102897 | 1490.230981 | 0.961474458  | 0.35005145  | 2.746666119  | 0.006020439 |
| ENSG00000158796 | 1377.127887 | 1.056866475  | 0.384914533 | 2.745717254  | 0.006037878 |
| ENSG00000079156 | 1441.662367 | 0.739370026  | 0.269315788 | 2.74536458   | 0.006044371 |
| ENSG00000221829 | 1237.398048 | -1.359161416 | 0.495091341 | -2.745274063 | 0.006046038 |
| ENSG00000119820 | 2325.168609 | 0.85947536   | 0.313081442 | 2.745213369  | 0.006047157 |
| ENSG00000158246 | 1263.78241  | 1.620875762  | 0.590483382 | 2.744998099  | 0.006051125 |
| ENSG00000213214 | 374.8438226 | 0.974234457  | 0.354922009 | 2.744925458  | 0.006052464 |

|                 |             |              |             |              |             |
|-----------------|-------------|--------------|-------------|--------------|-------------|
| ENSG00000137491 | 25.15841902 | 2.183375534  | 0.795626706 | 2.744221023  | 0.006065468 |
| ENSG00000151876 | 137.7278748 | -1.18224493  | 0.430842803 | -2.744028498 | 0.006069027 |
| ENSG00000138758 | 5545.025586 | -1.1337933   | 0.41324342  | -2.743645139 | 0.006076118 |
| ENSG00000224509 | 5.617253357 | 4.050463789  | 1.476346852 | 2.743571934  | 0.006077473 |
| ENSG00000127838 | 1110.713881 | -1.309249328 | 0.47722305  | -2.743474625 | 0.006079275 |
| ENSG00000121417 | 605.1515793 | 1.098838938  | 0.400541992 | 2.743380121  | 0.006081025 |
| ENSG00000246228 | 102.291244  | -1.631894058 | 0.594937132 | -2.742968912 | 0.006088645 |
| ENSG00000019169 | 10.63828249 | 3.862691694  | 1.408326002 | 2.742753943  | 0.006092632 |
| ENSG00000144824 | 5698.334757 | -1.540807164 | 0.561812482 | -2.742564849 | 0.006096141 |
| ENSG00000168569 | 360.5002985 | -0.948903816 | 0.346043248 | -2.742153824 | 0.006103775 |
| ENSG00000170871 | 3159.260115 | 0.772577395  | 0.281764859 | 2.741922464  | 0.006108076 |
| ENSG00000106003 | 212.3080169 | -2.044944195 | 0.745888607 | -2.741621438 | 0.006113676 |
| ENSG00000257270 | 72.18864371 | -1.460090084 | 0.532652742 | -2.741166932 | 0.006122139 |
| ENSG00000143793 | 692.2399468 | -1.102633856 | 0.402418529 | -2.740017607 | 0.006143589 |
| ENSG00000067704 | 5954.453356 | -1.096703979 | 0.400374099 | -2.73919812  | 0.006158925 |
| ENSG00000267758 | 6.478367372 | 4.135867187  | 1.509938701 | 2.739096086  | 0.006160836 |
| ENSG00000211452 | 30.56922697 | 2.397358166  | 0.875277833 | 2.738968219  | 0.006163233 |
| ENSG00000122971 | 611.0982883 | -1.083910573 | 0.39574701  | -2.738897691 | 0.006164555 |
| ENSG00000147874 | 2589.972137 | -0.916390833 | 0.334691618 | -2.73801549  | 0.006181116 |
| ENSG00000152465 | 1049.00601  | -0.861190295 | 0.314587702 | -2.737520535 | 0.006190426 |
| ENSG00000179085 | 282.7613573 | -1.269682506 | 0.463877927 | -2.737104811 | 0.006198254 |
| ENSG00000173456 | 1280.564471 | -1.051115229 | 0.384118167 | -2.736437167 | 0.006210845 |
| ENSG00000163655 | 4446.048228 | -0.860550742 | 0.314504944 | -2.736207356 | 0.006215185 |
| ENSG00000072135 | 1074.124681 | -1.28641978  | 0.470175238 | -2.736043233 | 0.006218286 |
| ENSG00000068784 | 817.0413527 | -0.978870552 | 0.357830066 | -2.735573796 | 0.006227162 |
| ENSG00000197343 | 3181.207552 | 1.034881657  | 0.378359065 | 2.735183989  | 0.006234542 |
| ENSG00000134247 | 4065.003263 | -0.721853299 | 0.263948355 | -2.734827797 | 0.006241292 |
| ENSG00000108468 | 5539.134966 | -0.740175492 | 0.270671331 | -2.734591389 | 0.006245775 |
| ENSG00000102898 | 3595.364883 | -0.779947491 | 0.285222077 | -2.734527072 | 0.006246996 |
| ENSG00000196275 | 66.67846963 | 1.524865475  | 0.557803845 | 2.733694807  | 0.006262806 |
| ENSG00000270810 | 6.840035085 | 4.343425939  | 1.588985087 | 2.733459222  | 0.006267288 |
| ENSG00000164674 | 1887.37976  | -1.448739167 | 0.530011307 | -2.733411812 | 0.006268191 |
| ENSG00000065491 | 906.478316  | 0.856197673  | 0.313313933 | 2.732714966  | 0.006281467 |
| ENSG00000108239 | 974.118993  | 1.001696287  | 0.366573228 | 2.732595324  | 0.006283749 |
| ENSG00000255650 | 90.88244037 | -1.622161909 | 0.593679498 | -2.732386606 | 0.006287731 |
| ENSG00000052344 | 1377.381801 | 0.787207445  | 0.288199651 | 2.73146564   | 0.006305332 |
| ENSG00000067208 | 1695.388821 | 0.97404818   | 0.356661725 | 2.731014043  | 0.006313978 |
| ENSG00000131845 | 813.2641558 | 1.224090773  | 0.448221199 | 2.730997053  | 0.006314304 |
| ENSG00000244242 | 87.4130058  | 1.684807897  | 0.6169271   | 2.730967561  | 0.006314869 |
| ENSG00000197841 | 401.7513836 | 1.192370903  | 0.437025273 | 2.728379746  | 0.006364629 |
| ENSG00000156860 | 4909.558492 | 1.142592558  | 0.418924183 | 2.727444736  | 0.006382695 |
| ENSG00000141458 | 4473.515948 | 1.104701459  | 0.405032557 | 2.727438668  | 0.006382812 |
| ENSG00000138193 | 599.1495126 | -0.897165997 | 0.328997182 | -2.72697168  | 0.006391852 |
| ENSG00000255561 | 68.15867604 | -2.032545847 | 0.745357847 | -2.726939625 | 0.006392473 |
| ENSG00000116095 | 1329.725355 | 0.858733965  | 0.314974875 | 2.726357031  | 0.006403769 |
| ENSG00000171791 | 183.8627315 | -1.203276905 | 0.441395168 | -2.726076296 | 0.006409218 |
| ENSG00000124181 | 2272.708369 | -0.868644834 | 0.31871583  | -2.725452434 | 0.006421343 |

|                 |             |              |             |              |             |
|-----------------|-------------|--------------|-------------|--------------|-------------|
| ENSG00000157881 | 784.4060414 | -0.817510408 | 0.300043693 | -2.72463787  | 0.006437205 |
| ENSG00000135297 | 1706.752094 | 0.929990486  | 0.341339701 | 2.724530676  | 0.006439295 |
| ENSG00000165886 | 774.999197  | 0.930856072  | 0.341661391 | 2.72449887   | 0.006439915 |
| ENSG00000141385 | 2465.390435 | -0.776317485 | 0.284943209 | -2.724463894 | 0.006440597 |
| ENSG00000175920 | 69.30598563 | -1.298029394 | 0.47652837  | -2.723928893 | 0.006451039 |
| ENSG00000113732 | 3039.778976 | 0.992814844  | 0.364553177 | 2.723374551  | 0.006461875 |
| ENSG00000132003 | 870.0078909 | 1.15438901   | 0.423962697 | 2.722855145  | 0.006472043 |
| ENSG00000266999 | 77.35270462 | -1.486081781 | 0.545806658 | -2.722725637 | 0.00647458  |
| ENSG00000160293 | 1427.594736 | -1.078467363 | 0.39617807  | -2.722178343 | 0.006485313 |
| ENSG00000175106 | 172.189679  | 1.060089389  | 0.389438364 | 2.722097992  | 0.00648689  |
| ENSG00000135632 | 1286.404547 | -0.827191574 | 0.303936226 | -2.721595856 | 0.006496754 |
| ENSG00000213585 | 9302.577362 | -0.813943194 | 0.29908195  | -2.721472141 | 0.006499186 |
| ENSG00000244607 | 128.0437181 | 1.489016533  | 0.547148668 | 2.721411238  | 0.006500384 |
| ENSG00000206989 | 32.04229684 | 1.534626981  | 0.564055289 | 2.720703113  | 0.006514324 |
| ENSG00000171483 | 16.83506552 | 4.002545107  | 1.471264765 | 2.720479142  | 0.006518738 |
| ENSG00000099624 | 2972.030943 | -1.155852305 | 0.424881965 | -2.720408017 | 0.006520141 |
| ENSG00000266304 | 17.82966066 | 1.999843901  | 0.735169624 | 2.720248276  | 0.006523292 |
| ENSG00000133606 | 5214.223199 | 0.829524761  | 0.304949449 | 2.720204164  | 0.006524162 |
| ENSG00000229020 | 26.45717591 | 2.091395453  | 0.768980765 | 2.719698007  | 0.006534156 |
| ENSG00000039139 | 27.07595419 | -2.37305502  | 0.872571735 | -2.719610233 | 0.006535891 |
| ENSG00000251467 | 6.735577928 | 4.348686063  | 1.599181385 | 2.719320087  | 0.006541627 |
| ENSG00000130545 | 758.9115772 | 0.771151382  | 0.283603283 | 2.719120084  | 0.006545584 |
| ENSG00000256001 | 234.8534735 | 1.371732433  | 0.504563523 | 2.718651609  | 0.006554861 |
| ENSG00000099875 | 7431.433213 | 0.74976774   | 0.275821521 | 2.718307614  | 0.00656168  |
| ENSG00000076685 | 2581.194315 | 0.798617331  | 0.293820281 | 2.718046989  | 0.006566851 |
| ENSG00000172869 | 2098.280217 | 0.903766857  | 0.332511471 | 2.718002042  | 0.006567743 |
| ENSG00000061337 | 283.5818566 | -1.687567338 | 0.621054043 | -2.717263269 | 0.006582423 |
| ENSG00000113119 | 379.5931906 | -1.567931499 | 0.577073504 | -2.717039491 | 0.006586875 |
| ENSG00000169696 | 996.6058607 | -0.720911078 | 0.265334714 | -2.716987415 | 0.006587911 |
| ENSG00000171988 | 6127.985018 | 0.865049793  | 0.318432472 | 2.71658788   | 0.006595868 |
| ENSG00000013375 | 2713.650972 | 0.685452078  | 0.252361198 | 2.716154794  | 0.006604503 |
| ENSG00000238273 | 35.13655654 | 1.684508855  | 0.620285943 | 2.71569729   | 0.006613636 |
| ENSG00000159720 | 3051.484008 | 1.360965921  | 0.501153436 | 2.715667144  | 0.006614238 |
| ENSG00000167842 | 1341.946825 | 0.816278122  | 0.300586974 | 2.715613762  | 0.006615304 |
| ENSG00000141699 | 3485.485866 | 1.06249072   | 0.391286452 | 2.715378246  | 0.006620011 |
| ENSG00000183864 | 4583.418206 | 0.836112877  | 0.307929756 | 2.715271457  | 0.006622147 |
| ENSG00000235052 | 6.995691264 | -3.315724331 | 1.221186385 | -2.715166473 | 0.006624246 |
| ENSG00000197620 | 288.8196194 | 0.94013352   | 0.346288793 | 2.71488289   | 0.006629921 |
| ENSG00000176884 | 293.3019338 | -1.585638667 | 0.58431168  | -2.713686413 | 0.006653912 |
| ENSG00000163485 | 120.7611905 | -1.633826087 | 0.602182942 | -2.713172317 | 0.006664244 |
| ENSG00000175054 | 1422.572338 | -0.863687116 | 0.318380366 | -2.712752446 | 0.006672693 |
| ENSG00000168894 | 1715.855767 | 1.063801222  | 0.392219744 | 2.712258211  | 0.006682651 |
| ENSG00000182459 | 653.0111195 | 1.049164249  | 0.386906979 | 2.711670521  | 0.00669451  |
| ENSG00000213918 | 799.8795045 | 1.241505686  | 0.457916664 | 2.711204428  | 0.006703928 |
| ENSG00000189238 | 23.80692525 | 1.887832583  | 0.696315157 | 2.711175484  | 0.006704513 |
| ENSG00000247853 | 97.23626385 | 1.484880113  | 0.547919846 | 2.710031627  | 0.006727679 |
| ENSG00000224660 | 264.88352   | 0.896651196  | 0.330886262 | 2.709847156  | 0.006731422 |

|                 |             |              |             |              |             |
|-----------------|-------------|--------------|-------------|--------------|-------------|
| ENSG00000180822 | 466.6485005 | -0.907565891 | 0.334990758 | -2.709226658 | 0.006744025 |
| ENSG00000245025 | 19.1140342  | 2.535388337  | 0.935943138 | 2.70891279   | 0.006750408 |
| ENSG00000176239 | 48.42062351 | -2.461347509 | 0.908962686 | -2.707864191 | 0.006771773 |
| ENSG00000270228 | 34.00579488 | 1.558636934  | 0.57578514  | 2.706976659  | 0.006789903 |
| ENSG00000166925 | 1711.810936 | 1.046780066  | 0.386711189 | 2.706878148  | 0.006791918 |
| ENSG00000117395 | 2775.254271 | -0.976062284 | 0.360752153 | -2.705631211 | 0.006817471 |
| ENSG00000243646 | 852.1406334 | 1.013515255  | 0.374652067 | 2.705217305  | 0.006825972 |
| ENSG00000066735 | 656.4329753 | -1.342991874 | 0.496604807 | -2.704347308 | 0.006843872 |
| ENSG00000130529 | 1303.256691 | -0.819627351 | 0.303102005 | -2.704130417 | 0.00684834  |
| ENSG00000058866 | 885.657361  | 1.253535028  | 0.463600569 | 2.703911754  | 0.006852849 |
| ENSG00000163170 | 659.7263905 | -1.044856599 | 0.386427204 | -2.703889863 | 0.0068533   |
| ENSG00000110395 | 6274.680684 | 0.824777109  | 0.30507467  | 2.703525366  | 0.006860821 |
| ENSG00000105135 | 1267.635044 | -1.217511807 | 0.450382084 | -2.7032865   | 0.006865754 |
| ENSG00000173480 | 342.3076489 | 1.339570623  | 0.495539731 | 2.703255742  | 0.006866389 |
| ENSG00000154237 | 615.7891334 | -1.168253918 | 0.432283812 | -2.702515997 | 0.006881687 |
| ENSG00000159871 | 127.9180475 | -1.772297018 | 0.655881519 | -2.702160325 | 0.006889053 |
| ENSG00000104983 | 103.0062044 | -1.849760514 | 0.684754127 | -2.701349932 | 0.006905864 |
| ENSG00000062194 | 6241.837162 | 0.994653072  | 0.368226148 | 2.701201634  | 0.006908944 |
| ENSG00000183421 | 765.2191052 | 0.734441879  | 0.271898296 | 2.701163965  | 0.006909726 |
| ENSG00000105483 | 961.086075  | 1.083851354  | 0.401297503 | 2.700867424  | 0.00691589  |
| ENSG00000197283 | 662.0949033 | -1.462301025 | 0.541438562 | -2.70077     | 0.006917916 |
| ENSG00000151292 | 2812.631918 | 0.721647635  | 0.267258143 | 2.700189517  | 0.006929999 |
| ENSG00000233429 | 220.0660327 | 1.078643318  | 0.399477996 | 2.700131992  | 0.006931197 |
| ENSG00000269974 | 14.89128458 | -2.408194224 | 0.891952125 | -2.699914216 | 0.006935736 |
| ENSG00000273237 | 30.88884206 | 1.760214259  | 0.652053762 | 2.69949253   | 0.006944531 |
| ENSG00000165591 | 199.7482843 | 0.97896315   | 0.362650358 | 2.699468317  | 0.006945037 |
| ENSG00000117477 | 18.59791918 | 2.252727603  | 0.834587876 | 2.699209597  | 0.006950439 |
| ENSG00000174776 | 5.544351149 | 4.94361899   | 1.83175534  | 2.698842406  | 0.006958112 |
| ENSG00000205090 | 12.35107783 | -2.286356374 | 0.847193406 | -2.698741938 | 0.006960213 |
| ENSG00000197409 | 19.93086412 | 2.577486602  | 0.95544091  | 2.697693363  | 0.006982172 |
| ENSG00000105656 | 1526.02904  | 1.151998144  | 0.427099517 | 2.697259297  | 0.006991281 |
| ENSG00000225032 | 79.61483202 | -1.253553226 | 0.464753926 | -2.697240745 | 0.00699167  |
| ENSG00000237667 | 3.730543036 | 5.369946125  | 1.991038757 | 2.697057557  | 0.006995518 |
| ENSG00000260034 | 26.31903868 | 2.00570015   | 0.743677181 | 2.697003754  | 0.006996648 |
| ENSG00000110328 | 770.9438937 | -1.645537628 | 0.610297151 | -2.696289216 | 0.007011676 |
| ENSG00000260105 | 58.324963   | 1.685174979  | 0.625055548 | 2.696040349  | 0.007016917 |
| ENSG00000239670 | 8.655528288 | 3.49502992   | 1.296407652 | 2.69593435   | 0.00701915  |
| ENSG00000254469 | 36.66035047 | -1.770647977 | 0.656807737 | -2.695839099 | 0.007021157 |
| ENSG00000127445 | 1246.238797 | -0.898634154 | 0.333355452 | -2.695723583 | 0.007023592 |
| ENSG00000141522 | 7059.043613 | -0.819950776 | 0.304257942 | -2.69491988  | 0.007040556 |
| ENSG00000175866 | 4292.514327 | 1.075144089  | 0.398963245 | 2.694844957  | 0.007042139 |
| ENSG00000100441 | 3312.785044 | 0.706943353  | 0.262434435 | 2.693790366  | 0.007064458 |
| ENSG00000136938 | 5334.651878 | -1.131654563 | 0.420118097 | -2.693658214 | 0.007067259 |
| ENSG00000153187 | 19885.61744 | -0.686082611 | 0.254760001 | -2.693054669 | 0.007080066 |
| ENSG00000183751 | 1727.857934 | -0.932302648 | 0.346196089 | -2.692990122 | 0.007081437 |
| ENSG00000162337 | 3102.144677 | -1.105878682 | 0.410700936 | -2.692661706 | 0.007088415 |
| ENSG00000266972 | 38.24739829 | -1.70875068  | 0.634618887 | -2.692561969 | 0.007090536 |

|                 |             |              |             |              |             |
|-----------------|-------------|--------------|-------------|--------------|-------------|
| ENSG00000198055 | 2293.026129 | -0.875528955 | 0.325226585 | -2.692058381 | 0.007101251 |
| ENSG00000151835 | 4969.666145 | -0.869687448 | 0.323058325 | -2.692044691 | 0.007101543 |
| ENSG00000135090 | 1190.345628 | 0.749624618  | 0.278494588 | 2.691702637  | 0.00710883  |
| ENSG00000157168 | 109.2400177 | -1.578308896 | 0.586442442 | -2.691327883 | 0.007116821 |
| ENSG00000149926 | 21.50451749 | -2.46714265  | 0.916712988 | -2.691292347 | 0.007117579 |
| ENSG00000173473 | 6669.58107  | -0.839964241 | 0.312123992 | -2.691123597 | 0.007121181 |
| ENSG00000204514 | 447.9406854 | 0.995938836  | 0.370208587 | 2.690209979  | 0.007140707 |
| ENSG00000242337 | 37.35612535 | 1.945029904  | 0.723136164 | 2.689714609  | 0.007151315 |
| ENSG00000170242 | 2779.492817 | 1.047298471  | 0.389372785 | 2.689706398  | 0.007151491 |
| ENSG00000200152 | 12.73386233 | 2.665443862  | 0.991207616 | 2.68908735   | 0.007164767 |
| ENSG00000135047 | 4296.258625 | 1.080890912  | 0.401957424 | 2.689068161  | 0.007165179 |
| ENSG00000134363 | 22.88753105 | 1.723988192  | 0.641166655 | 2.688830086  | 0.007170291 |
| ENSG00000260038 | 5.898781606 | 3.468692902  | 1.29024443  | 2.688399827  | 0.007179537 |
| ENSG00000112514 | 1844.566344 | -0.97369152  | 0.362196533 | -2.688296083 | 0.007181769 |
| ENSG00000114993 | 1963.785683 | -0.851278321 | 0.316673462 | -2.688189642 | 0.007184058 |
| ENSG00000153140 | 1027.196303 | -1.070752309 | 0.398327962 | -2.688117359 | 0.007185614 |
| ENSG00000166897 | 1899.229943 | -1.599458693 | 0.595068566 | -2.687856131 | 0.007191237 |
| ENSG00000135372 | 3268.99797  | -0.745289199 | 0.277282724 | -2.687831354 | 0.007191771 |
| ENSG00000271424 | 6.799656244 | 5.236768294  | 1.948426245 | 2.687691314  | 0.007194787 |
| ENSG00000102100 | 1682.392848 | 0.899812111  | 0.334861614 | 2.687116328  | 0.007207185 |
| ENSG00000112379 | 1937.451528 | 0.787951059  | 0.293257553 | 2.686890925  | 0.00721205  |
| ENSG00000139990 | 3009.393357 | 0.926635461  | 0.344896024 | 2.686709609  | 0.007215966 |
| ENSG00000156265 | 21.87385476 | 2.906714471  | 1.082318807 | 2.685636111  | 0.007239188 |
| ENSG00000250934 | 23.86566894 | 2.385490747  | 0.888452174 | 2.684996241  | 0.007253062 |
| ENSG00000075975 | 2908.234055 | 1.097782955  | 0.40890364  | 2.68469842   | 0.007259528 |
| ENSG00000186019 | 3.344569374 | 5.212491614  | 1.941720826 | 2.684470159  | 0.007264487 |
| ENSG00000049089 | 167.8132024 | -1.283800791 | 0.478320044 | -2.683978661 | 0.007275175 |
| ENSG00000187630 | 359.5460456 | -0.98609399  | 0.367452026 | -2.683599277 | 0.007283435 |
| ENSG00000027869 | 59.06200553 | -2.401892736 | 0.895049412 | -2.68353088  | 0.007284925 |
| ENSG00000165449 | 438.6421272 | -0.967148548 | 0.360449275 | -2.683175177 | 0.007292678 |
| ENSG00000172493 | 3861.086647 | 1.018734946  | 0.379751738 | 2.68263406   | 0.007304487 |
| ENSG00000103404 | 852.0708566 | -0.977890163 | 0.364553262 | -2.682434268 | 0.007308851 |
| ENSG00000234492 | 37.46855902 | 1.756009861  | 0.65480857  | 2.681714844  | 0.007324587 |
| ENSG00000238120 | 22.08183607 | 1.771804537  | 0.660708808 | 2.681672341  | 0.007325517 |
| ENSG00000134146 | 342.6011611 | -1.288449007 | 0.480596    | -2.68093993  | 0.007341569 |
| ENSG00000119227 | 59.23944227 | -1.34900874  | 0.503210739 | -2.680802765 | 0.007344579 |
| ENSG00000213453 | 23.42574596 | 2.258883991  | 0.842617769 | 2.680793206  | 0.007344789 |
| ENSG00000258428 | 3.387221794 | -5.198513764 | 1.939606217 | -2.680190298 | 0.007358032 |
| ENSG00000117500 | 3490.364362 | 0.969595891  | 0.361794283 | 2.679964655  | 0.007362993 |
| ENSG00000166199 | 1028.04161  | 1.034144352  | 0.385886743 | 2.679916766  | 0.007364047 |
| ENSG00000164744 | 747.9234338 | 1.541219506  | 0.575145996 | 2.679701356  | 0.007368787 |
| ENSG00000110906 | 3561.569348 | 1.086113841  | 0.405336091 | 2.679538941  | 0.007372363 |
| ENSG00000187145 | 2017.730514 | -0.843563644 | 0.314819587 | -2.679514489 | 0.007372901 |
| ENSG00000135069 | 11575.64128 | 1.094128739  | 0.408353844 | 2.679364366  | 0.007376208 |
| ENSG00000151240 | 3040.57793  | 1.181565032  | 0.44099757  | 2.679300551  | 0.007377614 |
| ENSG00000137563 | 1286.531724 | -1.02126162  | 0.381185561 | -2.679171838 | 0.007380451 |
| ENSG00000227959 | 60.56676583 | 2.327855159  | 0.868907576 | 2.679059571  | 0.007382926 |



|                 |             |              |             |              |             |
|-----------------|-------------|--------------|-------------|--------------|-------------|
| ENSG00000251669 | 92.5976008  | -1.550708271 | 0.578831515 | -2.679032205 | 0.007383529 |
| ENSG00000175691 | 422.5105555 | 0.859884675  | 0.320977912 | 2.678952794  | 0.00738528  |
| ENSG00000185267 | 63.14399787 | 1.325013847  | 0.494606711 | 2.678924116  | 0.007385913 |
| ENSG00000174792 | 19.02952723 | 1.957162739  | 0.73065262  | 2.678650133  | 0.007391959 |
| ENSG00000125454 | 439.4605358 | -0.965633907 | 0.360507027 | -2.678543928 | 0.007394303 |
| ENSG00000148358 | 5635.51594  | 0.79253734   | 0.295902182 | 2.678376129  | 0.007398009 |
| ENSG00000231551 | 6.985430068 | 4.23681935   | 1.581893811 | 2.678320961  | 0.007399228 |
| ENSG00000232709 | 47.46220833 | 2.304948074  | 0.860629863 | 2.678210662  | 0.007401665 |
| ENSG00000188321 | 643.5371773 | 1.269335524  | 0.47411617  | 2.67726689   | 0.007422548 |
| ENSG00000145016 | 2189.594278 | 1.032906185  | 0.385875322 | 2.67678736   | 0.007433179 |
| ENSG00000136877 | 1555.262435 | -0.843846486 | 0.31528008  | -2.676497939 | 0.007439602 |
| ENSG00000184507 | 12.03489035 | -2.602784461 | 0.972545457 | -2.676259956 | 0.007444888 |
| ENSG00000171475 | 4254.484584 | 0.839052615  | 0.31353905  | 2.676070541  | 0.007449096 |
| ENSG00000161513 | 2834.243551 | -1.138530522 | 0.425461771 | -2.675987829 | 0.007450935 |
| ENSG00000180044 | 52.17464718 | -1.892782281 | 0.707371222 | -2.675797689 | 0.007455163 |
| ENSG00000164167 | 855.9148858 | -0.903327939 | 0.337748286 | -2.674559651 | 0.007482746 |
| ENSG00000156381 | 500.8824501 | -1.096626099 | 0.410032203 | -2.674487737 | 0.007484351 |
| ENSG00000247077 | 2808.574314 | -0.776622199 | 0.290448016 | -2.673876758 | 0.007498    |
| ENSG00000268759 | 4.605407935 | 4.669145733  | 1.74626341  | 2.673792343  | 0.007499888 |
| ENSG00000225724 | 4.334107737 | 4.585223548  | 1.715308353 | 2.673119115  | 0.007514956 |
| ENSG00000110108 | 1158.913379 | -0.892543886 | 0.333925653 | -2.672882055 | 0.007520269 |
| ENSG00000213672 | 1056.018388 | -1.299518342 | 0.486273583 | -2.672401683 | 0.007531044 |
| ENSG00000104643 | 1407.385458 | 0.917080782  | 0.343244352 | 2.671801519  | 0.007544526 |
| ENSG00000175895 | 1380.307682 | 0.786518496  | 0.294433642 | 2.671292897  | 0.007555968 |
| ENSG00000204103 | 63.29482831 | 1.531807902  | 0.573466068 | 2.671139562  | 0.007559421 |
| ENSG00000189164 | 136.414487  | 1.200143841  | 0.449319893 | 2.671023159  | 0.007562043 |
| ENSG00000160055 | 247.0795817 | 1.511122566  | 0.565834399 | 2.670609228  | 0.007571373 |
| ENSG00000198467 | 6362.139152 | -0.719151884 | 0.269303202 | -2.670417134 | 0.007575707 |
| ENSG00000150456 | 177.287524  | -0.979195583 | 0.366768006 | -2.669795531 | 0.007589745 |
| ENSG00000196597 | 190.7094356 | 1.255324715  | 0.470270261 | 2.669368702  | 0.007599398 |
| ENSG00000160803 | 3141.241629 | -0.811235008 | 0.30397509  | -2.668754893 | 0.007613299 |
| ENSG00000144559 | 356.637147  | -1.352279867 | 0.506772547 | -2.668415793 | 0.007620988 |
| ENSG00000167106 | 1966.047753 | 0.821900364  | 0.308055503 | 2.668026886  | 0.007629815 |
| ENSG00000196227 | 1159.565206 | 1.226072322  | 0.459554515 | 2.667958387  | 0.007631371 |
| ENSG00000137168 | 1740.257129 | -0.806644153 | 0.302429212 | -2.667216395 | 0.007648241 |
| ENSG00000116747 | 4303.745228 | 0.824904087  | 0.309281262 | 2.667164769  | 0.007649416 |
| ENSG00000113318 | 204.8000784 | 0.93770897   | 0.351588398 | 2.6670646    | 0.007651696 |
| ENSG00000166435 | 736.7335002 | 0.981252782  | 0.367923761 | 2.667000302  | 0.00765316  |
| ENSG00000232112 | 704.1586167 | -1.001523572 | 0.375651918 | -2.666094659 | 0.007673808 |
| ENSG00000104450 | 1137.975929 | 1.110504081  | 0.416529274 | 2.666088918  | 0.007673939 |
| ENSG00000165121 | 139.2788558 | 1.007369138  | 0.377960992 | 2.665272763  | 0.00769259  |
| ENSG00000255753 | 13.59644758 | -2.522042576 | 0.946284227 | -2.665206187 | 0.007694113 |
| ENSG00000273329 | 163.955587  | 1.50052409   | 0.563033748 | 2.665069538  | 0.00769724  |
| ENSG00000119285 | 3235.242601 | -0.922514142 | 0.346171302 | -2.664906466 | 0.007700974 |
| ENSG00000165805 | 6.378787673 | 4.265585451  | 1.6007055   | 2.664815889  | 0.007703048 |
| ENSG00000198837 | 1711.717751 | -1.137882725 | 0.427050898 | -2.664513127 | 0.007709986 |
| ENSG00000232559 | 426.5765086 | 1.007844091  | 0.378265045 | 2.664386005  | 0.0077129   |

|                 |             |              |             |              |             |
|-----------------|-------------|--------------|-------------|--------------|-------------|
| ENSG00000177738 | 65.54488175 | 1.728049918  | 0.648635794 | 2.664129752  | 0.007718778 |
| ENSG00000129472 | 1852.242616 | 0.929733898  | 0.348982722 | 2.664125874  | 0.007718867 |
| ENSG00000106399 | 780.7538294 | -1.04802086  | 0.393498161 | -2.663343734 | 0.007736834 |
| ENSG00000207652 | 52.90909538 | -1.679112376 | 0.630477613 | -2.663238697 | 0.007739249 |
| ENSG00000135870 | 2606.592002 | 1.011327559  | 0.37979293  | 2.662839354  | 0.00774844  |
| ENSG00000196646 | 225.2669167 | 1.476103723  | 0.554338337 | 2.662820923  | 0.007748864 |
| ENSG00000167034 | 681.6604367 | 1.074802654  | 0.403763291 | 2.661962291  | 0.007768658 |
| ENSG00000172350 | 211.7839583 | -1.462589991 | 0.549572565 | -2.661322787 | 0.00778343  |
| ENSG00000270679 | 4.919894949 | 5.769536356  | 2.168259862 | 2.660906314  | 0.007793064 |
| ENSG00000214425 | 279.5724319 | -0.882640703 | 0.331736287 | -2.660669749 | 0.007798541 |
| ENSG00000182851 | 20.57721005 | 2.531329607  | 0.951414396 | 2.660596284  | 0.007800242 |
| ENSG00000146729 | 2363.923824 | -1.446980664 | 0.543897267 | -2.660393334 | 0.007804944 |
| ENSG00000189134 | 4.93032538  | 5.772478605  | 2.169836072 | 2.660329358  | 0.007806427 |
| ENSG00000165724 | 1324.567095 | -0.872158995 | 0.32789224  | -2.659895195 | 0.007816497 |
| ENSG00000238755 | 4.909464518 | 5.766602111  | 2.168045161 | 2.659816417  | 0.007818325 |
| ENSG00000196689 | 24.75581195 | -1.817212791 | 0.68321387  | -2.65980079  | 0.007818688 |
| ENSG00000235437 | 627.3672332 | 1.20577981   | 0.453338037 | 2.659780808  | 0.007819152 |
| ENSG00000116213 | 1696.70704  | -0.771753938 | 0.290200826 | -2.659378851 | 0.007828488 |
| ENSG00000130703 | 2624.724865 | 0.939125677  | 0.353274562 | 2.658345034  | 0.007852545 |
| ENSG00000226390 | 13.56658506 | -2.153095833 | 0.809939817 | -2.658340519 | 0.007852651 |
| ENSG00000115159 | 3665.750414 | -0.890506269 | 0.334988339 | -2.658320198 | 0.007853124 |
| ENSG00000169126 | 274.9814092 | -1.739405561 | 0.654354796 | -2.658199455 | 0.007855938 |
| ENSG00000103375 | 5.350310375 | 4.890904527  | 1.839966716 | 2.65814837   | 0.007857129 |
| ENSG00000110330 | 3408.014394 | 0.728463307  | 0.274075438 | 2.657893434  | 0.007863075 |
| ENSG00000267453 | 171.330856  | 1.053472237  | 0.396395412 | 2.657629746  | 0.007869229 |
| ENSG00000188986 | 2786.465356 | -0.803612056 | 0.302381381 | -2.657610905 | 0.007869669 |
| ENSG00000170128 | 3.323708512 | 5.204499255  | 1.958831136 | 2.656941254  | 0.007885318 |
| ENSG00000132661 | 499.3258676 | -1.076708864 | 0.405253848 | -2.656875113 | 0.007886865 |
| ENSG00000175224 | 3681.903648 | 0.833273119  | 0.313680746 | 2.656436932  | 0.007897122 |
| ENSG00000103148 | 820.2795195 | -0.999043495 | 0.376097036 | -2.656345035 | 0.007899275 |
| ENSG00000075914 | 1107.318545 | -0.965300974 | 0.363395914 | -2.656334147 | 0.00789953  |
| ENSG00000213076 | 4.974736506 | 4.785507632  | 1.802059908 | 2.655576328  | 0.007917301 |
| ENSG00000145506 | 746.6960374 | -0.955941005 | 0.360044495 | -2.655063525 | 0.007929347 |
| ENSG00000172757 | 20292.76277 | -0.723617299 | 0.272552989 | -2.654960061 | 0.00793178  |
| ENSG00000182318 | 479.2377043 | 1.028357833  | 0.387369532 | 2.654720484  | 0.007937415 |
| ENSG00000113595 | 1010.738904 | 0.880434629  | 0.331831197 | 2.653260564  | 0.007971831 |
| ENSG00000259230 | 74.04813584 | 2.07330203   | 0.781423349 | 2.653237879  | 0.007972366 |
| ENSG00000249850 | 9.796883493 | 3.482999673  | 1.312895834 | 2.65291395   | 0.007980021 |
| ENSG00000133134 | 1211.972716 | 0.696477214  | 0.262617904 | 2.65205534   | 0.008000343 |
| ENSG00000006534 | 619.3165729 | -1.133179113 | 0.42728694  | -2.65203311  | 0.00800087  |
| ENSG00000121350 | 645.4430934 | 1.053332744  | 0.397261767 | 2.651482806  | 0.008013919 |
| ENSG00000170044 | 11.27761034 | 2.765868089  | 1.043170851 | 2.651404692  | 0.008015773 |
| ENSG00000215251 | 1965.833287 | 1.270423554  | 0.479162797 | 2.651340132  | 0.008017306 |
| ENSG00000155189 | 3234.46291  | -1.39791254  | 0.527263149 | -2.651261597 | 0.00801917  |
| ENSG00000142875 | 8806.434374 | -0.861886233 | 0.325115158 | -2.651018299 | 0.008024949 |
| ENSG00000154548 | 4.437706505 | 4.603682107  | 1.736911711 | 2.650498629  | 0.008037305 |
| ENSG00000204301 | 15.05299431 | -1.933400956 | 0.729496906 | -2.650320981 | 0.008041533 |

|                 |             |              |             |              |             |
|-----------------|-------------|--------------|-------------|--------------|-------------|
| ENSG00000114859 | 668.724455  | -0.72259514  | 0.272713355 | -2.649650727 | 0.008057502 |
| ENSG00000124713 | 46.0592746  | 1.653152905  | 0.623923457 | 2.649608514  | 0.008058509 |
| ENSG00000224618 | 3.333481176 | -5.178286496 | 1.954385009 | -2.649573382 | 0.008059347 |
| ENSG00000227799 | 74.43693112 | 1.386591599  | 0.523332512 | 2.649542246  | 0.008060089 |
| ENSG00000100105 | 1102.592783 | -0.95594328  | 0.360852983 | -2.64912118  | 0.008070139 |
| ENSG00000023330 | 6106.456459 | 0.931271386  | 0.351722374 | 2.64774565   | 0.008103047 |
| ENSG00000139437 | 608.4673222 | -0.749455539 | 0.283075988 | -2.6475419   | 0.008107931 |
| ENSG00000251576 | 11.68942114 | 2.809497817  | 1.061356353 | 2.647082489  | 0.008118955 |
| ENSG00000243479 | 83.95071751 | -1.669889504 | 0.630933713 | -2.646695633 | 0.008128247 |
| ENSG00000017483 | 828.5236319 | -0.982746453 | 0.371417936 | -2.645931598 | 0.008146629 |
| ENSG00000264918 | 22.34952066 | 1.650119113  | 0.623794846 | 2.645291355  | 0.008162061 |
| ENSG00000115145 | 1700.367428 | 0.872034844  | 0.329692705 | 2.644992837  | 0.008169265 |
| ENSG00000117614 | 2317.925749 | 0.802923079  | 0.303570009 | 2.644935449  | 0.00817065  |
| ENSG00000096092 | 1057.951961 | -1.027980954 | 0.388685654 | -2.644761761 | 0.008174845 |
| ENSG00000183718 | 474.1984467 | 1.004936995  | 0.379981673 | 2.644698589  | 0.008176371 |
| ENSG00000158106 | 1083.14366  | -1.452910947 | 0.549373232 | -2.644670074 | 0.00817706  |
| ENSG00000054523 | 7315.412592 | 1.143480935  | 0.432515675 | 2.643790738  | 0.008198332 |
| ENSG00000132359 | 3071.221584 | -1.409103101 | 0.533293288 | -2.64226671  | 0.008235318 |
| ENSG00000250889 | 4.951167346 | 4.756935773  | 1.800565678 | 2.641911834  | 0.008243951 |
| ENSG00000183475 | 1544.406753 | 0.920644379  | 0.348533487 | 2.641480411  | 0.008254458 |
| ENSG00000168936 | 706.3775701 | -1.390574626 | 0.526480254 | -2.641266439 | 0.008259674 |
| ENSG00000181924 | 1515.958906 | -0.858283512 | 0.324975619 | -2.64107047  | 0.008264453 |
| ENSG00000149289 | 1423.594443 | 0.780161478  | 0.29540408  | 2.640997638  | 0.00826623  |
| ENSG00000170091 | 30.19073144 | 2.909965397  | 1.102020793 | 2.640572133  | 0.008276617 |
| ENSG00000234698 | 3.204758002 | 5.15554256   | 1.95273307  | 2.640167588  | 0.008286504 |
| ENSG00000116455 | 731.4589094 | -0.976864718 | 0.370017923 | -2.640047032 | 0.008289452 |
| ENSG00000221838 | 386.5666165 | -0.753073194 | 0.28529629  | -2.639617899 | 0.008299955 |
| ENSG00000178445 | 276.3613938 | -1.218391937 | 0.461627701 | -2.639338877 | 0.00830679  |
| ENSG00000178852 | 141.8453089 | 1.577240027  | 0.59766085  | 2.639021825  | 0.008314563 |
| ENSG00000184432 | 11873.39165 | 0.790014309  | 0.299364513 | 2.638971133  | 0.008315806 |
| ENSG00000224621 | 36.06969244 | 2.596989188  | 0.984299308 | 2.638414115  | 0.00832948  |
| ENSG00000167614 | 49.64075014 | 1.506546482  | 0.571171077 | 2.637644908  | 0.008348395 |
| ENSG00000172667 | 2516.930265 | 0.714576941  | 0.270939984 | 2.63739936   | 0.008354441 |
| ENSG00000157540 | 3309.268758 | 0.872013982  | 0.330724969 | 2.636674168  | 0.008372321 |
| ENSG00000101444 | 10062.8024  | -0.964947546 | 0.366004627 | -2.636435373 | 0.008378216 |
| ENSG00000271270 | 38.76837652 | -1.401708485 | 0.53190541  | -2.635258934 | 0.008407312 |
| ENSG00000053371 | 1464.427633 | -1.234556727 | 0.46847753  | -2.635252807 | 0.008407464 |
| ENSG00000206630 | 29.18518113 | -1.869177285 | 0.709382182 | -2.634936897 | 0.008415293 |
| ENSG00000232716 | 15.39413826 | 2.814955312  | 1.068339485 | 2.634888397  | 0.008416495 |
| ENSG00000113407 | 13352.40489 | 0.735932972  | 0.279358448 | 2.634368061  | 0.008429406 |
| ENSG00000128335 | 1054.295799 | 1.41807466   | 0.538316366 | 2.634277445  | 0.008431656 |
| ENSG00000180739 | 169.4657432 | -1.350605964 | 0.512722187 | -2.634186694 | 0.00843391  |
| ENSG00000148803 | 127.1997382 | -1.196081701 | 0.454061203 | -2.634186079 | 0.008433925 |
| ENSG00000163382 | 2198.798492 | -0.922860208 | 0.350364808 | -2.63399801  | 0.008438598 |
| ENSG00000166848 | 3449.516902 | 1.159867206  | 0.440382307 | 2.633773402  | 0.008444182 |
| ENSG00000007923 | 1912.372422 | -0.691929578 | 0.262761866 | -2.63329527  | 0.00845608  |
| ENSG00000064687 | 3047.70851  | -1.056752033 | 0.401312055 | -2.633242683 | 0.008457389 |

|                 |             |              |             |              |             |
|-----------------|-------------|--------------|-------------|--------------|-------------|
| ENSG00000167232 | 577.801629  | 1.082701938  | 0.411253845 | 2.632685267  | 0.008471281 |
| ENSG00000170919 | 974.6886083 | 0.815484964  | 0.30976328  | 2.632606953  | 0.008473234 |
| ENSG00000237190 | 1135.574794 | -1.117647522 | 0.424567969 | -2.632434857 | 0.008477528 |
| ENSG00000047230 | 624.3187539 | -0.772991846 | 0.293830387 | -2.63074168  | 0.008519877 |
| ENSG00000247796 | 99.65306868 | -1.173158938 | 0.446010442 | -2.630339624 | 0.008529961 |
| ENSG00000149657 | 1883.398832 | -0.841606837 | 0.319984141 | -2.630151714 | 0.008534677 |
| ENSG00000186891 | 731.106949  | -1.104210368 | 0.420009905 | -2.629010305 | 0.008563377 |
| ENSG00000183597 | 604.1484257 | 1.185600128  | 0.451125357 | 2.62809463   | 0.008586463 |
| ENSG00000177683 | 2521.980719 | 0.697009928  | 0.265239368 | 2.627852469  | 0.008592577 |
| ENSG00000167333 | 697.8352467 | 1.155658238  | 0.439866572 | 2.627292712  | 0.008606726 |
| ENSG00000100116 | 863.8022182 | -1.468656763 | 0.559003167 | -2.627278073 | 0.008607097 |
| ENSG00000225648 | 1948.449032 | 1.085516348  | 0.413172811 | 2.627269555  | 0.008607312 |
| ENSG00000099992 | 424.347462  | 0.848243521  | 0.323004101 | 2.62610759   | 0.008636751 |
| ENSG00000065809 | 3049.642969 | 1.066088296  | 0.405999803 | 2.625834519  | 0.008643683 |
| ENSG00000155363 | 2317.905803 | -0.830502049 | 0.316395969 | -2.62488189  | 0.008667903 |
| ENSG00000204390 | 30.94384115 | 1.850115777  | 0.704947445 | 2.624473341  | 0.008678309 |
| ENSG00000214413 | 1044.820647 | 1.037663521  | 0.395386853 | 2.624425958  | 0.008679516 |
| ENSG00000070759 | 415.3692695 | 0.84241787   | 0.321005075 | 2.624313244  | 0.008682389 |
| ENSG00000071564 | 4901.083867 | -0.785970148 | 0.299535061 | -2.623967106 | 0.008691218 |
| ENSG00000132781 | 585.8972065 | -1.195312431 | 0.455604186 | -2.62357649  | 0.00870119  |
| ENSG00000130021 | 596.8107211 | -0.947737573 | 0.361265645 | -2.623381403 | 0.008706175 |
| ENSG00000156097 | 15.46430423 | 1.893735746  | 0.721900384 | 2.623264635  | 0.00870916  |
| ENSG00000100393 | 4645.847448 | 0.891632394  | 0.339912952 | 2.623119801  | 0.008712863 |
| ENSG00000175416 | 2953.934053 | 1.472683601  | 0.561534845 | 2.622604123  | 0.00872606  |
| ENSG00000110925 | 2103.167263 | 1.009079171  | 0.384814901 | 2.622245573  | 0.008735246 |
| ENSG00000153774 | 801.502747  | -1.215696604 | 0.463649375 | -2.622017133 | 0.008741104 |
| ENSG00000145293 | 2324.975108 | -0.882344059 | 0.336595309 | -2.62137955  | 0.00875747  |
| ENSG00000160345 | 154.4914126 | -1.248447472 | 0.476272008 | -2.621290885 | 0.008759748 |
| ENSG00000132128 | 2911.01205  | 1.106817991  | 0.42228118  | 2.621045038  | 0.008766068 |
| ENSG00000141497 | 53.29848641 | -1.504592191 | 0.574052704 | -2.621000095 | 0.008767224 |
| ENSG00000244219 | 59.25628164 | 1.287715541  | 0.491387867 | 2.62056845   | 0.008778331 |
| ENSG00000226763 | 42.42632687 | 1.711861936  | 0.653251812 | 2.620523825  | 0.00877948  |
| ENSG00000197106 | 948.0797246 | -1.259647312 | 0.480713609 | -2.620369568 | 0.008783452 |
| ENSG00000243910 | 5.262050745 | 4.847351168  | 1.850311359 | 2.619748911  | 0.008799453 |
| ENSG00000157510 | 438.4111725 | -1.061053385 | 0.405022302 | -2.619740638 | 0.008799666 |
| ENSG00000174307 | 1416.724976 | 0.875994009  | 0.334419418 | 2.619447205  | 0.00880724  |
| ENSG00000213995 | 1637.667708 | 1.014391468  | 0.387258926 | 2.61941404   | 0.008808097 |
| ENSG00000167889 | 283.0800245 | -1.087227179 | 0.415113067 | -2.619110948 | 0.008815927 |
| ENSG00000213397 | 13.47947331 | -2.220369475 | 0.847801428 | -2.618973502 | 0.00881948  |
| ENSG00000159166 | 1647.569559 | -1.002155226 | 0.382662037 | -2.618904225 | 0.008821271 |
| ENSG00000160410 | 2285.090835 | -0.758443761 | 0.289741854 | -2.61765344  | 0.008853667 |
| ENSG00000123737 | 2529.402546 | -0.908393662 | 0.347032908 | -2.617600931 | 0.00885503  |
| ENSG00000174226 | 16.07022555 | 2.241717519  | 0.856407902 | 2.617581543  | 0.008855533 |
| ENSG00000263045 | 5.028212647 | 4.783516045  | 1.82750782  | 2.617507839  | 0.008857445 |
| ENSG00000169018 | 3963.74071  | 0.779515831  | 0.297830684 | 2.617312029  | 0.008862529 |
| ENSG00000130821 | 3663.309903 | -0.675531157 | 0.258103703 | -2.617285796 | 0.00886321  |
| ENSG00000179967 | 28.64455455 | -1.791284413 | 0.684493139 | -2.616950136 | 0.00887193  |

|                 |             |              |             |              |             |
|-----------------|-------------|--------------|-------------|--------------|-------------|
| ENSG00000267546 | 24.2147259  | 1.842659327  | 0.7042523   | 2.616476123  | 0.008884258 |
| ENSG00000239445 | 51.06478867 | 1.665904878  | 0.636792809 | 2.616086198  | 0.00889441  |
| ENSG00000052723 | 3096.428771 | 0.723525157  | 0.276707179 | 2.614768291  | 0.008928801 |
| ENSG00000130299 | 1354.205811 | -1.239102829 | 0.473976121 | -2.614272692 | 0.008941764 |
| ENSG00000152700 | 2754.61457  | 0.961538028  | 0.367871195 | 2.613789942  | 0.008954407 |
| ENSG00000253965 | 7.198755803 | 3.272074187  | 1.251994527 | 2.613489211  | 0.008962291 |
| ENSG00000245748 | 10.51789752 | 3.552967871  | 1.359512705 | 2.613412775  | 0.008964296 |
| ENSG00000033030 | 2225.339315 | 1.11428964   | 0.426460851 | 2.612876744  | 0.008978368 |
| ENSG00000070770 | 6216.366878 | 0.826416909  | 0.316336848 | 2.61245857   | 0.008989359 |
| ENSG00000179241 | 1222.838211 | -1.440912697 | 0.551621782 | -2.61213887  | 0.00899777  |
| ENSG00000163349 | 4242.212626 | 0.898024699  | 0.343794918 | 2.61209416   | 0.008998947 |
| ENSG00000087085 | 258.554561  | 1.019263831  | 0.390270834 | 2.611683327  | 0.009009767 |
| ENSG00000231638 | 25.71263694 | 2.559993767  | 0.980298256 | 2.611443764  | 0.009016082 |
| ENSG00000010932 | 18.87959171 | -1.993911814 | 0.763896792 | -2.610184823 | 0.009049332 |
| ENSG00000178234 | 1164.825762 | -0.957524191 | 0.366875637 | -2.609942155 | 0.009055753 |
| ENSG00000165678 | 14732.34552 | 1.208191037  | 0.462936393 | 2.609842422  | 0.009058394 |
| ENSG00000072657 | 67.88838454 | -1.454726575 | 0.557608133 | -2.608869005 | 0.009084201 |
| ENSG00000216895 | 95.19627264 | 1.147388113  | 0.439805157 | 2.608855525  | 0.009084559 |
| ENSG00000226658 | 4.704993313 | 5.705333424  | 2.187402736 | 2.608268396  | 0.009100157 |
| ENSG00000180881 | 753.2005373 | 0.833596192  | 0.319622958 | 2.608061062  | 0.009105671 |
| ENSG00000170631 | 675.435287  | 0.912112808  | 0.349738758 | 2.607983211  | 0.009107742 |
| ENSG00000257194 | 3.160959031 | 5.131109158  | 1.967625415 | 2.607767271  | 0.009113489 |
| ENSG00000103326 | 1035.795938 | -0.749699472 | 0.287512779 | -2.607534432 | 0.00911969  |
| ENSG00000157911 | 286.659816  | -1.277301379 | 0.489960956 | -2.606945236 | 0.009135397 |
| ENSG00000167110 | 4604.991649 | 0.75423507   | 0.289330201 | 2.606831461  | 0.009138433 |
| ENSG00000243323 | 17.49961946 | -1.8919608   | 0.725841069 | -2.606577226 | 0.00914522  |
| ENSG00000237940 | 26.51997416 | -2.025586848 | 0.77714174  | -2.606457412 | 0.00914842  |
| ENSG00000187097 | 639.9453331 | -1.196636293 | 0.45913805  | -2.60626688  | 0.009153511 |
| ENSG00000121895 | 14.39508067 | 2.250836887  | 0.863628109 | 2.606257096  | 0.009153772 |
| ENSG00000127080 | 657.8444619 | 1.199082684  | 0.460116093 | 2.606043785  | 0.009159475 |
| ENSG00000213762 | 546.2328916 | 0.854618224  | 0.327937594 | 2.606039195  | 0.009159598 |
| ENSG00000226582 | 5.207809601 | 5.851532207  | 2.2458403   | 2.605497909  | 0.009174083 |
| ENSG00000132376 | 1413.855385 | 0.849784346  | 0.326192203 | 2.6051645    | 0.009183016 |
| ENSG00000144214 | 285.2120932 | 1.023504846  | 0.392875708 | 2.605161951  | 0.009183084 |
| ENSG00000211698 | 11.35343806 | 3.944317438  | 1.514040763 | 2.605159341  | 0.009183154 |
| ENSG00000136754 | 3309.356644 | 0.918784223  | 0.352873771 | 2.603719229  | 0.009221827 |
| ENSG00000253180 | 9.758562776 | 2.726878695  | 1.047310408 | 2.603696741  | 0.009222432 |
| ENSG00000253326 | 22.0231411  | 2.019234708  | 0.775685289 | 2.603162309  | 0.009236821 |
| ENSG00000103037 | 532.3424517 | -1.120537889 | 0.430732655 | -2.601469557 | 0.00928253  |
| ENSG00000216901 | 12.69093955 | 2.201098978  | 0.846125747 | 2.60138518   | 0.009284814 |
| ENSG00000271835 | 3.1505286   | 5.126835283  | 1.971135705 | 2.600955008  | 0.009296465 |
| ENSG00000268218 | 231.948391  | 1.135002518  | 0.436418871 | 2.600718242  | 0.009302883 |
| ENSG00000061455 | 61.10828388 | 1.423796184  | 0.54748607  | 2.600607142  | 0.009305895 |
| ENSG00000137876 | 9645.388725 | 0.730334259  | 0.280837371 | 2.600559374  | 0.009307191 |
| ENSG00000165644 | 317.8913179 | -1.939535288 | 0.74594482  | -2.600105579 | 0.009319508 |
| ENSG00000125885 | 1112.46366  | -1.300473148 | 0.500223993 | -2.599781632 | 0.00932831  |
| ENSG00000255837 | 10.5976462  | -2.302197339 | 0.885771081 | -2.599088396 | 0.00934717  |

|                 |             |              |             |              |             |
|-----------------|-------------|--------------|-------------|--------------|-------------|
| ENSG00000137947 | 2734.216472 | 1.053768029  | 0.405449658 | 2.59901077   | 0.009349284 |
| ENSG00000019144 | 1678.650697 | -0.712176428 | 0.27402259  | -2.598969767 | 0.009350401 |
| ENSG00000162998 | 159.3794225 | 1.787904391  | 0.687961304 | 2.598844414  | 0.009353816 |
| ENSG00000154734 | 19.03027727 | 2.396799037  | 0.92226191  | 2.598826873  | 0.009354294 |
| ENSG00000184787 | 5035.362818 | -0.803348241 | 0.309167922 | -2.598420419 | 0.009365375 |
| ENSG00000258366 | 35.57940177 | -2.043667177 | 0.786544982 | -2.598283916 | 0.009369099 |
| ENSG00000181544 | 189.9353162 | -1.262944412 | 0.486088723 | -2.598176735 | 0.009372024 |
| ENSG00000119946 | 4.903047477 | 4.748673248  | 1.827870192 | 2.597926959  | 0.009378844 |
| ENSG00000240163 | 17.24006895 | 2.334187041  | 0.898632261 | 2.597488586  | 0.009390824 |
| ENSG00000157450 | 2296.35477  | 0.977887904  | 0.376497412 | 2.597329686  | 0.00939517  |
| ENSG00000099622 | 4970.224443 | -0.716038265 | 0.275771226 | -2.59649375  | 0.009418062 |
| ENSG00000231503 | 46.96941539 | -1.55630052  | 0.599396262 | -2.596446821 | 0.009419349 |
| ENSG00000140950 | 1788.717618 | 0.728358107  | 0.280556882 | 2.596115638  | 0.009428433 |
| ENSG00000129250 | 6572.112971 | -0.729424136 | 0.280984602 | -2.595957678 | 0.009432768 |
| ENSG00000214293 | 362.8306916 | 0.845400993  | 0.325662824 | 2.595939518  | 0.009433267 |
| ENSG00000100982 | 808.9244488 | -0.924820891 | 0.356260961 | -2.595908595 | 0.009434116 |
| ENSG00000265158 | 4.778006329 | 5.726795991  | 2.206121264 | 2.595866367  | 0.009435275 |
| ENSG00000253676 | 5.201615076 | -3.919496633 | 1.510014966 | -2.595667408 | 0.00944074  |
| ENSG00000175772 | 156.2739638 | -1.71840979  | 0.662098914 | -2.595397387 | 0.009448161 |
| ENSG00000137941 | 2220.350467 | 1.138147044  | 0.438621567 | 2.594826909  | 0.009463857 |
| ENSG00000141759 | 2652.675788 | -0.958180353 | 0.369306194 | -2.59454179  | 0.00947171  |
| ENSG00000223638 | 8.86349264  | 3.471264132  | 1.338021319 | 2.594326474  | 0.009477644 |
| ENSG00000236432 | 49.88055911 | 1.569783531  | 0.605215429 | 2.593759934  | 0.009493275 |
| ENSG00000176994 | 1132.86093  | 1.181924127  | 0.455682701 | 2.593743685  | 0.009493723 |
| ENSG00000272077 | 173.3511727 | 1.183781758  | 0.456445447 | 2.593479168  | 0.009501029 |
| ENSG00000169629 | 295.6042778 | 0.953337883  | 0.367596558 | 2.593435283  | 0.009502242 |
| ENSG00000166444 | 155.9357776 | -1.017616615 | 0.392438056 | -2.593063032 | 0.009512533 |
| ENSG00000270346 | 357.516225  | 1.276205757  | 0.492194136 | 2.592891025  | 0.009517292 |
| ENSG00000135698 | 1314.099914 | -0.76757868  | 0.296044505 | -2.592781379 | 0.009520327 |
| ENSG00000086061 | 16426.86884 | 1.229513938  | 0.474208346 | 2.592771613  | 0.009520597 |
| ENSG00000197451 | 7242.16556  | -0.784822072 | 0.302704756 | -2.59269819  | 0.00952263  |
| ENSG00000130347 | 332.6577151 | -0.763649125 | 0.294538488 | -2.592697239 | 0.009522656 |
| ENSG00000153093 | 136.4498941 | -1.502689693 | 0.579680886 | -2.592270554 | 0.009534476 |
| ENSG00000163006 | 362.6807683 | -1.125824545 | 0.434325442 | -2.592122029 | 0.009538593 |
| ENSG00000243648 | 6.090058486 | 4.091439743  | 1.578435564 | 2.592085376  | 0.009539609 |
| ENSG00000146830 | 2665.925027 | -0.831112715 | 0.320640924 | -2.592035676 | 0.009540988 |
| ENSG00000170458 | 25.96016232 | 2.49587534   | 0.963018014 | 2.591722381  | 0.00954968  |
| ENSG00000273131 | 377.329779  | 1.081293789  | 0.417278366 | 2.591300859  | 0.009561386 |
| ENSG00000066583 | 1788.140069 | -0.790923406 | 0.30529567  | -2.590680064 | 0.00957865  |
| ENSG00000189433 | 73.71037558 | -1.51505892  | 0.58482464  | -2.590620876 | 0.009580297 |
| ENSG00000108465 | 3210.393743 | -1.074962084 | 0.415080229 | -2.589769422 | 0.009604024 |
| ENSG00000160051 | 157.3154544 | -1.214924899 | 0.469193646 | -2.589389071 | 0.009614639 |
| ENSG00000162290 | 3652.915829 | 0.908335212  | 0.35083192  | 2.589089417  | 0.00962301  |
| ENSG00000116133 | 7402.476739 | -0.690915285 | 0.266919522 | -2.588477902 | 0.009640113 |
| ENSG00000106031 | 273.0986302 | -1.169934826 | 0.45197798  | -2.588477488 | 0.009640125 |
| ENSG00000224138 | 113.0779653 | 1.218443698  | 0.470767757 | 2.5882055    | 0.00964774  |
| ENSG00000204959 | 667.1847638 | 0.924346374  | 0.35716026  | 2.588043737  | 0.009652272 |

|                 |             |              |             |              |             |
|-----------------|-------------|--------------|-------------|--------------|-------------|
| ENSG00000101311 | 1488.35808  | -1.491493365 | 0.576383115 | -2.587677058 | 0.009662552 |
| ENSG00000257743 | 59.26331386 | 2.254190773  | 0.871249516 | 2.587307919  | 0.009672911 |
| ENSG00000198917 | 1274.47495  | -0.749018092 | 0.289543529 | -2.586892876 | 0.00968457  |
| ENSG00000144659 | 1953.915036 | 0.899903922  | 0.347895359 | 2.586708617  | 0.009689749 |
| ENSG00000163536 | 516.6408171 | 0.923164827  | 0.356939921 | 2.586331126  | 0.009700369 |
| ENSG00000225361 | 160.8795245 | 1.135515628  | 0.439374461 | 2.584391509  | 0.009755099 |
| ENSG00000251474 | 706.0807586 | 0.874772019  | 0.338488873 | 2.584344982  | 0.009756415 |
| ENSG00000139428 | 392.2699438 | -1.39789427  | 0.54092687  | -2.584257408 | 0.009758893 |
| ENSG00000011260 | 2898.082785 | -0.967004444 | 0.374199246 | -2.584196663 | 0.009760612 |
| ENSG00000107099 | 13.75206213 | 2.544229749  | 0.984641571 | 2.583914619  | 0.009768597 |
| ENSG00000196668 | 245.7204163 | -2.037670277 | 0.78866941  | -2.583681135 | 0.009775212 |
| ENSG00000013275 | 8722.955362 | 1.445699982  | 0.55958025  | 2.583543614  | 0.00977911  |
| ENSG00000162851 | 887.3990943 | -0.926587186 | 0.358650145 | -2.583540532 | 0.009779198 |
| ENSG00000262877 | 65.15119956 | -1.112616358 | 0.430773756 | -2.582832272 | 0.009799295 |
| ENSG00000198331 | 560.0368836 | -0.947028246 | 0.366806195 | -2.581821841 | 0.009828031 |
| ENSG00000141504 | 1454.643641 | 0.791387619  | 0.306527602 | 2.581782569  | 0.009829149 |
| ENSG00000164985 | 4408.878685 | -0.866228577 | 0.33551882  | -2.581758532 | 0.009829834 |
| ENSG00000101574 | 976.8638853 | 1.12445787   | 0.435562456 | 2.581622578  | 0.009833706 |
| ENSG00000123870 | 126.2244405 | 1.178556991  | 0.456550759 | 2.581436932  | 0.009838997 |
| ENSG00000167965 | 1228.998879 | -0.995996423 | 0.385924604 | -2.580805711 | 0.009857004 |
| ENSG00000121989 | 887.0259652 | 1.000274276  | 0.387607103 | 2.580639695  | 0.009861745 |
| ENSG00000249084 | 5.389885876 | -4.848723682 | 1.878945371 | -2.580555964 | 0.009864137 |
| ENSG00000182004 | 2195.052376 | -0.872608089 | 0.338201829 | -2.580140066 | 0.009876025 |
| ENSG00000090520 | 8053.790634 | 0.973354622  | 0.377294474 | 2.579827403  | 0.009884971 |
| ENSG00000145331 | 536.7652396 | 0.933060962  | 0.361719263 | 2.579516931  | 0.009893861 |
| ENSG00000161326 | 2292.607358 | 1.087973596  | 0.42177732  | 2.579497627  | 0.009894414 |
| ENSG00000100504 | 7136.230206 | -1.165859771 | 0.452006299 | -2.579299832 | 0.009900082 |
| ENSG00000253250 | 16.3143334  | 2.731903093  | 1.059251763 | 2.579087606  | 0.009906166 |
| ENSG00000084093 | 3353.558771 | 0.758217077  | 0.294187915 | 2.577322314  | 0.009956906 |
| ENSG00000100319 | 440.1182944 | 1.333189759  | 0.517302848 | 2.577193928  | 0.009960605 |
| ENSG00000255142 | 19.44038349 | -1.739567    | 0.675015651 | -2.577076542 | 0.009963988 |
| ENSG00000144320 | 3000.638452 | 0.963646425  | 0.373987059 | 2.576683875  | 0.009975313 |
| ENSG00000103710 | 3.062869382 | 5.088614677  | 1.975361936 | 2.576041679  | 0.00999386  |
| ENSG00000118217 | 4032.185863 | 0.716765283  | 0.278247986 | 2.575994504  | 0.009995224 |
| ENSG00000175911 | 87.89962415 | 1.289854317  | 0.500773075 | 2.575726174  | 0.010002983 |
| ENSG00000182628 | 2191.46211  | -0.929134542 | 0.360756796 | -2.57551501  | 0.010009093 |
| ENSG00000160867 | 2313.5663   | -1.026152439 | 0.398466205 | -2.575255886 | 0.010016595 |
| ENSG00000136280 | 1171.762878 | -0.880925569 | 0.342079252 | -2.575209004 | 0.010017953 |
| ENSG00000248919 | 4.483749127 | 4.608038837  | 1.789488062 | 2.575059837  | 0.010022275 |
| ENSG00000118520 | 9.392419844 | 2.422659856  | 0.940969951 | 2.574641043  | 0.010034417 |
| ENSG00000120647 | 514.5150663 | -0.951637179 | 0.369622168 | -2.574621498 | 0.010034983 |
| ENSG00000261652 | 63.92333172 | 1.143892587  | 0.444334884 | 2.574392935  | 0.010041616 |
| ENSG00000171566 | 6784.988958 | 0.873270739  | 0.339240109 | 2.574196613  | 0.010047316 |
| ENSG00000166902 | 1253.462568 | -0.84293607  | 0.32752622  | -2.573644543 | 0.01006336  |
| ENSG00000269952 | 19.28008324 | 2.716527616  | 1.055674404 | 2.573262746  | 0.010074469 |
| ENSG00000197140 | 221.3548046 | 1.630381325  | 0.633630142 | 2.573080439  | 0.010079778 |
| ENSG00000157193 | 2508.763702 | -1.382154609 | 0.53717239  | -2.573018708 | 0.010081576 |

|                 |             |              |             |              |             |
|-----------------|-------------|--------------|-------------|--------------|-------------|
| ENSG00000052841 | 3311.480018 | 0.656093559  | 0.255061487 | 2.572295672  | 0.010102657 |
| ENSG00000130204 | 4454.304435 | -0.852569228 | 0.331489667 | -2.571933041 | 0.010113245 |
| ENSG00000257122 | 143.6455767 | 1.537157803  | 0.597708853 | 2.571750102  | 0.01011859  |
| ENSG00000173166 | 322.7660237 | 0.913188443  | 0.355100581 | 2.571633202  | 0.010122007 |
| ENSG00000059145 | 2245.924521 | 1.376375634  | 0.535254858 | 2.571439782  | 0.010127663 |
| ENSG00000150764 | 447.8647032 | -1.221766078 | 0.475177808 | -2.571176636 | 0.010135362 |
| ENSG00000185238 | 1100.116112 | -0.872177085 | 0.339234976 | -2.571011677 | 0.010140191 |
| ENSG00000108852 | 840.5139615 | -0.740723872 | 0.28815628  | -2.570563003 | 0.010153336 |
| ENSG00000006007 | 3236.336525 | 0.798603005  | 0.310691065 | 2.570408664  | 0.010157861 |
| ENSG00000164136 | 282.2324594 | 0.860388169  | 0.334750578 | 2.570236541  | 0.01016291  |
| ENSG00000124145 | 12191.27632 | 1.011091739  | 0.393389782 | 2.570203357  | 0.010163883 |
| ENSG00000171017 | 80.97219271 | 1.132956104  | 0.440847746 | 2.56994873   | 0.010171357 |
| ENSG00000141644 | 3667.819766 | 1.119678248  | 0.435684864 | 2.569926889  | 0.010171998 |
| ENSG00000146278 | 2642.743583 | 1.008488438  | 0.39247582  | 2.569555591  | 0.010182905 |
| ENSG00000124508 | 1112.51918  | 0.891494743  | 0.346978943 | 2.569305025  | 0.010190272 |
| ENSG00000116183 | 20.1971321  | 2.259416258  | 0.879518549 | 2.568923941  | 0.010201485 |
| ENSG00000101417 | 151.3012088 | -1.092803919 | 0.425446696 | -2.56860361  | 0.010210918 |
| ENSG00000103671 | 1432.194189 | 0.910436304  | 0.354458004 | 2.568530807  | 0.010213063 |
| ENSG00000152234 | 17859.23137 | -0.723410188 | 0.281659125 | -2.568388962 | 0.010217244 |
| ENSG00000260648 | 6.455275725 | -4.247412951 | 1.653747848 | -2.568355845 | 0.01021822  |
| ENSG00000097021 | 4168.311603 | -0.873744531 | 0.340202006 | -2.568310934 | 0.010219544 |
| ENSG00000198832 | 1549.09013  | 1.037030873  | 0.403831172 | 2.567981241  | 0.010229269 |
| ENSG00000131844 | 1947.640198 | -1.192456831 | 0.464367203 | -2.567917852 | 0.01023114  |
| ENSG00000005339 | 4375.966489 | 0.9172736    | 0.357240564 | 2.56766362   | 0.010238646 |
| ENSG00000131591 | 515.8260538 | -0.839796175 | 0.327067277 | -2.56765575  | 0.010238878 |
| ENSG00000242622 | 35.88910268 | 1.787397075  | 0.696210724 | 2.567321953  | 0.010248741 |
| ENSG00000184271 | 384.6371486 | 0.85061197   | 0.331346969 | 2.5671337    | 0.010254307 |
| ENSG00000169752 | 209.247494  | 0.908077604  | 0.353743642 | 2.567049966  | 0.010256783 |
| ENSG00000002079 | 69.95614104 | -1.477982802 | 0.575831593 | -2.566692799 | 0.010267353 |
| ENSG00000150687 | 493.7481333 | -0.873486175 | 0.340331422 | -2.56657516  | 0.010270836 |
| ENSG00000105641 | 69.18741234 | -1.795903935 | 0.699812567 | -2.566264199 | 0.010280049 |
| ENSG00000105186 | 2386.802807 | -1.02475207  | 0.399345694 | -2.566077674 | 0.010285579 |
| ENSG00000161249 | 3328.724162 | -1.032190385 | 0.402267661 | -2.565929318 | 0.010289979 |
| ENSG00000166396 | 6.184305609 | -3.501270653 | 1.364668958 | -2.565655673 | 0.0102981   |
| ENSG00000054967 | 928.982815  | 1.25694747   | 0.489933941 | 2.565544792  | 0.010301392 |
| ENSG00000240350 | 4.552674263 | 5.657225567  | 2.205260225 | 2.565332428  | 0.0103077   |
| ENSG00000225605 | 4.531813401 | 5.650867435  | 2.203060966 | 2.565007289  | 0.010317364 |
| ENSG00000178199 | 26.83722745 | 2.310253521  | 0.900718537 | 2.564900605  | 0.010320536 |
| ENSG00000132142 | 7734.044893 | -1.247053709 | 0.486330388 | -2.564210958 | 0.010341067 |
| ENSG00000237522 | 61.02356809 | 1.326485886  | 0.517315803 | 2.564170434  | 0.010342275 |
| ENSG00000078668 | 3603.258379 | -0.688975142 | 0.268714322 | -2.563968813 | 0.010348284 |
| ENSG00000181191 | 1145.435095 | 0.691683883  | 0.269784086 | 2.563842419  | 0.010352053 |
| ENSG00000230581 | 8.071642519 | 4.036971585  | 1.574811724 | 2.563462999  | 0.010363375 |
| ENSG00000169245 | 9.977474563 | -3.128147516 | 1.220541268 | -2.56291827  | 0.010379648 |
| ENSG00000162616 | 3197.088791 | 1.383645813  | 0.539874863 | 2.562900976  | 0.010380165 |
| ENSG00000125875 | 3225.485553 | 0.659216767  | 0.257297109 | 2.562083846  | 0.01040462  |
| ENSG00000182329 | 7.635441102 | 3.977572856  | 1.552543908 | 2.56197125   | 0.010407993 |



|                 |             |              |             |              |             |
|-----------------|-------------|--------------|-------------|--------------|-------------|
| ENSG00000183971 | 1514.860689 | -1.401337262 | 0.546994681 | -2.561884622 | 0.01041059  |
| ENSG00000204262 | 203.34051   | 1.353352731  | 0.528264606 | 2.561884168  | 0.010410603 |
| ENSG00000162521 | 6074.926217 | -0.776782606 | 0.30326127  | -2.561430305 | 0.010424215 |
| ENSG00000244754 | 4498.845493 | 0.680372691  | 0.265643866 | 2.561221163  | 0.010430493 |
| ENSG00000196976 | 492.4321076 | -1.186349503 | 0.463201019 | -2.561197956 | 0.01043119  |
| ENSG00000169258 | 859.9906225 | -0.819514306 | 0.320010019 | -2.560902023 | 0.010440079 |
| ENSG00000119927 | 1584.220817 | -0.842210183 | 0.328965195 | -2.560180211 | 0.01046179  |
| ENSG00000186567 | 339.3255797 | 0.908243635  | 0.35477856  | 2.560029659  | 0.010466323 |
| ENSG00000172965 | 1206.116334 | 1.516484257  | 0.592526576 | 2.559352302  | 0.010486741 |
| ENSG00000126070 | 3283.30634  | 0.773860502  | 0.30236653  | 2.559345779  | 0.010486937 |
| ENSG00000230055 | 537.857177  | -1.432580535 | 0.559779601 | -2.559186743 | 0.010491737 |
| ENSG00000166669 | 747.5693903 | 1.124749943  | 0.439550393 | 2.558864607  | 0.010501463 |
| ENSG00000137054 | 1829.55012  | -0.890480348 | 0.348073402 | -2.558311962 | 0.010518169 |
| ENSG00000127337 | 748.2262026 | -0.818643944 | 0.320061763 | -2.55776865  | 0.010534615 |
| ENSG00000134058 | 3930.852405 | 0.8535784    | 0.3337277   | 2.557709173  | 0.010536417 |
| ENSG00000173581 | 60.12882076 | 1.563694277  | 0.61147625  | 2.5572445    | 0.010550503 |
| ENSG00000248487 | 125.5381112 | -1.179282802 | 0.46130921  | -2.556382524 | 0.010576678 |
| ENSG00000139865 | 19.52210039 | 2.915921634  | 1.140654253 | 2.556358884  | 0.010577396 |
| ENSG00000232686 | 6.701988113 | 3.189916604  | 1.247837351 | 2.556356085  | 0.010577482 |
| ENSG00000100902 | 631.9013916 | 1.215873383  | 0.475751081 | 2.555692319  | 0.010597678 |
| ENSG00000100815 | 2251.707527 | 0.924653092  | 0.361943368 | 2.554689971  | 0.010628242 |
| ENSG00000167291 | 2568.424934 | -1.230319502 | 0.481635967 | -2.554459358 | 0.010635284 |
| ENSG00000161664 | 69.89238821 | 1.597648964  | 0.625447574 | 2.554409084  | 0.01063682  |
| ENSG00000069248 | 2554.947274 | -0.698004373 | 0.273295698 | -2.554026199 | 0.010648524 |
| ENSG00000185168 | 123.254426  | -1.453328516 | 0.569064057 | -2.553892656 | 0.010652609 |
| ENSG00000083067 | 7.219469496 | 3.799279407  | 1.487716773 | 2.553765256  | 0.010656507 |
| ENSG00000226416 | 63.38533941 | -1.827588259 | 0.715651756 | -2.553739644 | 0.010657291 |
| ENSG00000213799 | 753.1182842 | 1.17808652   | 0.461323164 | 2.553712044  | 0.010658136 |
| ENSG00000155393 | 569.241254  | -1.19502531  | 0.467966458 | -2.55365591  | 0.010659854 |
| ENSG00000114738 | 3000.877341 | -0.948794061 | 0.371582117 | -2.553389995 | 0.010667997 |
| ENSG00000100239 | 2526.83414  | -0.778085538 | 0.304736251 | -2.553308101 | 0.010670506 |
| ENSG00000254088 | 12.26388426 | 3.12149501   | 1.222634616 | 2.553089017  | 0.01067722  |
| ENSG00000123240 | 1388.226859 | 0.855659813  | 0.33515945  | 2.552993246  | 0.010680157 |
| ENSG00000054267 | 2666.352939 | 0.883550904  | 0.34609838  | 2.552889448  | 0.01068334  |
| ENSG00000156603 | 861.6217858 | 0.835928863  | 0.327465881 | 2.552720489  | 0.010688523 |
| ENSG00000090006 | 5195.990797 | -0.915050241 | 0.358463777 | -2.552699323 | 0.010689173 |
| ENSG00000125826 | 4610.796729 | 0.884030528  | 0.346328025 | 2.55258155   | 0.010692787 |
| ENSG00000110921 | 748.2248561 | -0.816173618 | 0.319755109 | -2.552495945 | 0.010695415 |
| ENSG00000185504 | 1506.533388 | -0.791703663 | 0.310288581 | -2.55150757  | 0.010725799 |
| ENSG00000130590 | 65.39007833 | -1.116304136 | 0.437555168 | -2.551230603 | 0.010734327 |
| ENSG00000219891 | 140.4495238 | 0.92096112   | 0.361032131 | 2.55091179   | 0.010744152 |
| ENSG00000118939 | 102.3111588 | 1.037882755  | 0.406927518 | 2.550534702  | 0.010755782 |
| ENSG00000188419 | 1338.948454 | 0.837186341  | 0.328257462 | 2.550395464  | 0.010760079 |
| ENSG00000250571 | 576.5027062 | -0.98251086  | 0.385283367 | -2.550099338 | 0.010769223 |
| ENSG00000181135 | 907.2192458 | 1.268356156  | 0.497390712 | 2.550019786  | 0.010771681 |
| ENSG00000258112 | 3.008578705 | 5.070960233  | 1.98875843  | 2.549812062  | 0.0107781   |
| ENSG00000166823 | 146.7694153 | -1.450451656 | 0.568875355 | -2.549682708 | 0.0107821   |

|                 |             |              |             |              |             |
|-----------------|-------------|--------------|-------------|--------------|-------------|
| ENSG00000128253 | 67.19952074 | 1.492746805  | 0.585524925 | 2.549416331  | 0.01079034  |
| ENSG00000078902 | 1589.371734 | 1.047045569  | 0.41073654  | 2.549190212  | 0.010797339 |
| ENSG00000230772 | 9.423963049 | 2.879768021  | 1.129790001 | 2.548940969  | 0.010805059 |
| ENSG00000179021 | 1385.666508 | 0.955773103  | 0.374972328 | 2.548916366  | 0.010805821 |
| ENSG00000204673 | 3896.859191 | 1.151467512  | 0.451758311 | 2.548857397  | 0.010807648 |
| ENSG00000205500 | 16.4697042  | 2.135380685  | 0.837781577 | 2.548851328  | 0.010807836 |
| ENSG00000062370 | 238.0275569 | 1.224445773  | 0.480488741 | 2.548333956  | 0.01082388  |
| ENSG00000167874 | 20.35450324 | 1.651656953  | 0.648156224 | 2.548238975  | 0.010826828 |
| ENSG00000141580 | 8737.443944 | 0.660125733  | 0.259075077 | 2.548009411  | 0.010833955 |
| ENSG00000185532 | 207.6959146 | 1.641169807  | 0.644134306 | 2.547868964  | 0.010838317 |
| ENSG00000171163 | 1188.902081 | -1.096406449 | 0.430396087 | -2.547435914 | 0.010851778 |
| ENSG00000269845 | 18.51991952 | 2.525973811  | 0.991929046 | 2.546526712  | 0.010880088 |
| ENSG00000058262 | 13514.36451 | 0.774373941  | 0.304128519 | 2.546206264  | 0.010890082 |
| ENSG00000164715 | 3593.614043 | 0.945252322  | 0.37125887  | 2.546073368  | 0.010894229 |
| ENSG00000111364 | 1474.654168 | -0.699558387 | 0.274766861 | -2.546007129 | 0.010896296 |
| ENSG00000166801 | 1227.955996 | -0.711579841 | 0.279492629 | -2.54596997  | 0.010897456 |
| ENSG00000147533 | 2307.665206 | 0.907951773  | 0.35667873  | 2.545573083  | 0.010909852 |
| ENSG00000267942 | 9.33995281  | -2.684083359 | 1.0545296   | -2.545289728 | 0.01091871  |
| ENSG00000238181 | 10.37542655 | 3.208824772  | 1.26069157  | 2.545289306  | 0.010918723 |
| ENSG00000197932 | 212.3600555 | -1.307474075 | 0.513715474 | -2.545132744 | 0.01092362  |
| ENSG00000138413 | 7116.877901 | 0.715610729  | 0.281169293 | 2.545124051  | 0.010923892 |
| ENSG00000222040 | 46.39290864 | -1.334717257 | 0.524550754 | -2.544495927 | 0.010943559 |
| ENSG00000007520 | 797.6331212 | -0.85226895  | 0.334959751 | -2.544392115 | 0.010946812 |
| ENSG00000270081 | 766.7870818 | -0.683341536 | 0.268579617 | -2.544279208 | 0.010950352 |
| ENSG00000178229 | 549.9794503 | 0.888942001  | 0.349397913 | 2.544210964  | 0.010952491 |
| ENSG00000168209 | 4150.127879 | 1.311834992  | 0.515719051 | 2.543700857  | 0.010968498 |
| ENSG00000137547 | 1414.199623 | -0.845212816 | 0.332360134 | -2.543063168 | 0.010988536 |
| ENSG00000137434 | 59.07845612 | 1.05736211   | 0.415880289 | 2.54246748   | 0.011007284 |
| ENSG00000075336 | 870.3045635 | -0.940719817 | 0.370038858 | -2.542219004 | 0.011015113 |
| ENSG00000137038 | 464.566991  | -1.144913745 | 0.450787403 | -2.539808647 | 0.011091313 |
| ENSG00000265194 | 147.6769921 | -1.979428203 | 0.779376969 | -2.539757116 | 0.011092948 |
| ENSG00000163510 | 2425.897097 | 0.988789762  | 0.389327897 | 2.539735194  | 0.011093643 |
| ENSG00000164663 | 1657.403234 | 0.836995955  | 0.32957145  | 2.539649462  | 0.011096362 |
| ENSG00000163521 | 152.8587335 | -0.943507093 | 0.37155723  | -2.53933181  | 0.011106443 |
| ENSG00000178252 | 4040.464972 | -0.713159798 | 0.280947196 | -2.538412231 | 0.011135673 |
| ENSG00000166197 | 13073.0212  | -0.698651513 | 0.275239509 | -2.538340207 | 0.011137965 |
| ENSG00000037757 | 271.4421648 | -1.05457303  | 0.415496981 | -2.538100346 | 0.011145602 |
| ENSG00000130173 | 6.95601303  | 3.925865804  | 1.546871247 | 2.537939607  | 0.011150722 |
| ENSG00000088682 | 1418.139348 | -0.870010165 | 0.342857484 | -2.537527124 | 0.011163872 |
| ENSG00000181666 | 889.1172896 | 0.90564674   | 0.356911942 | 2.53745149   | 0.011166284 |
| ENSG00000128694 | 379.516951  | -1.308865829 | 0.515857859 | -2.537260618 | 0.011172375 |
| ENSG00000256294 | 310.1300043 | 1.335666023  | 0.526482169 | 2.536963453  | 0.011181863 |
| ENSG00000184702 | 381.3827881 | -1.125912053 | 0.443827572 | -2.536823138 | 0.011186345 |
| ENSG00000081087 | 680.2260087 | 0.823398327  | 0.324613855 | 2.536547079  | 0.011195169 |
| ENSG00000104870 | 28.85904968 | -1.835212578 | 0.723510183 | -2.53654008  | 0.011195393 |
| ENSG00000199753 | 130.0843721 | -0.872363215 | 0.343933715 | -2.536428318 | 0.011198967 |
| ENSG00000268816 | 26.04965084 | -1.547886846 | 0.610269991 | -2.536396792 | 0.011199975 |

|                 |             |              |             |              |             |
|-----------------|-------------|--------------|-------------|--------------|-------------|
| ENSG00000116514 | 1529.134382 | 0.916805476  | 0.361498617 | 2.536124439  | 0.01120869  |
| ENSG00000214198 | 78.74160719 | 1.533294749  | 0.604614465 | 2.535987538  | 0.011213072 |
| ENSG00000023572 | 742.1742814 | 0.898552007  | 0.35439685  | 2.535440162  | 0.011230611 |
| ENSG00000235408 | 13.81004821 | -2.222941285 | 0.87691061  | -2.534969082 | 0.011245725 |
| ENSG00000159882 | 280.2734036 | 1.273989845  | 0.502594802 | 2.53482495   | 0.011250353 |
| ENSG00000260233 | 21.79142302 | 1.711293945  | 0.67513155  | 2.534756293  | 0.011252558 |
| ENSG00000100027 | 85.20673838 | -1.280100645 | 0.505046155 | -2.534621107 | 0.011256901 |
| ENSG00000254923 | 3.083668969 | 5.109156515  | 2.01627234  | 2.533961515  | 0.011278112 |
| ENSG00000080200 | 674.3962012 | 0.851878613  | 0.336245173 | 2.53350436   | 0.011292834 |
| ENSG00000235481 | 3.248618248 | 5.169404514  | 2.040568101 | 2.53331634   | 0.011298893 |
| ENSG00000185115 | 1444.874961 | 0.926600427  | 0.365811478 | 2.532999872  | 0.011309099 |
| ENSG00000197021 | 869.4004004 | 0.975221569  | 0.385040676 | 2.532775443  | 0.011316342 |
| ENSG00000135318 | 3788.716058 | -1.374865766 | 0.542880641 | -2.532537841 | 0.011324015 |
| ENSG00000131697 | 632.1999895 | -1.072135035 | 0.423438275 | -2.531974783 | 0.011342215 |
| ENSG00000265205 | 35.26043186 | 2.210582327  | 0.873144693 | 2.531747997  | 0.011349553 |
| ENSG00000113312 | 3266.199573 | 1.066335854  | 0.421228785 | 2.531488571  | 0.011357952 |
| ENSG00000249740 | 51.13736237 | 2.095143896  | 0.827696097 | 2.531296093  | 0.011364187 |
| ENSG00000267595 | 13.05063315 | 2.161624872  | 0.853984261 | 2.531223317  | 0.011366545 |
| ENSG00000263053 | 27.62828363 | -1.784551636 | 0.705414416 | -2.529791844 | 0.011413021 |
| ENSG00000150776 | 2112.514172 | 0.951859396  | 0.376325055 | 2.529354298  | 0.011427261 |
| ENSG00000108510 | 9892.619205 | 0.893496835  | 0.353262922 | 2.529268655  | 0.01143005  |
| ENSG00000158483 | 177.5533554 | -1.530966029 | 0.605323497 | -2.529170001 | 0.011433263 |
| ENSG00000204588 | 91.01437919 | -1.276419727 | 0.504839467 | -2.528367554 | 0.011459431 |
| ENSG00000136738 | 2401.543345 | 1.08199211   | 0.428015269 | 2.527928762  | 0.011473763 |
| ENSG00000187446 | 5923.521788 | 0.707709276  | 0.28000151  | 2.527519497  | 0.011487145 |
| ENSG00000005889 | 1511.781317 | 0.92975379   | 0.367917228 | 2.527073265  | 0.011501751 |
| ENSG00000270696 | 270.3255341 | -0.996356442 | 0.394328991 | -2.526713641 | 0.011513534 |
| ENSG00000168288 | 5999.535333 | 0.983672707  | 0.389319171 | 2.526648521  | 0.011515669 |
| ENSG00000090924 | 951.2712138 | -0.883523074 | 0.349712881 | -2.526424169 | 0.011523026 |
| ENSG00000205155 | 380.1300364 | 1.035699522  | 0.410055576 | 2.525754025  | 0.011545028 |
| ENSG00000127022 | 34775.27425 | 0.642759401  | 0.254563949 | 2.52494277   | 0.011571713 |
| ENSG00000180626 | 451.8630144 | 1.207478816  | 0.478270929 | 2.524675329  | 0.011580522 |
| ENSG00000164904 | 2399.576329 | -1.503483546 | 0.595618999 | -2.52423705  | 0.011594971 |
| ENSG00000142864 | 16163.60333 | -0.855357505 | 0.338871189 | -2.524137587 | 0.011598253 |
| ENSG00000247595 | 24.2991535  | 1.591434081  | 0.630525227 | 2.523981618  | 0.0116034   |
| ENSG00000041515 | 12.0403147  | 2.159594826  | 0.855693188 | 2.523795744  | 0.011609536 |
| ENSG00000231725 | 3.649238112 | 5.338385316  | 2.116246003 | 2.522573136  | 0.011649972 |
| ENSG00000111328 | 1276.85815  | -0.749709794 | 0.297230834 | -2.522315013 | 0.011658525 |
| ENSG00000246526 | 17.89004495 | 2.685736094  | 1.064936604 | 2.521968052  | 0.011670031 |
| ENSG00000185847 | 630.9144417 | -1.012402011 | 0.401539801 | -2.521299281 | 0.011692236 |
| ENSG00000124459 | 893.2046978 | 1.016651652  | 0.403244562 | 2.521178827  | 0.011696239 |
| ENSG00000267590 | 5.490072214 | 4.00820043   | 1.590415735 | 2.520221815  | 0.01172809  |
| ENSG00000134291 | 2458.998851 | -0.86216763  | 0.342160059 | -2.519778702 | 0.011742864 |
| ENSG00000111845 | 1126.237988 | -0.968256443 | 0.384291349 | -2.519589488 | 0.011749177 |
| ENSG00000234160 | 126.7582189 | -1.060138312 | 0.420766422 | -2.519541146 | 0.011750791 |
| ENSG00000137674 | 12.36702678 | -2.145431867 | 0.851653806 | -2.519136123 | 0.011764317 |
| ENSG00000166436 | 1086.404838 | -1.40006972  | 0.555780556 | -2.519105256 | 0.011765348 |

|                 |             |              |             |              |             |
|-----------------|-------------|--------------|-------------|--------------|-------------|
| ENSG00000124549 | 306.3341568 | 1.130239331  | 0.448744645 | 2.518669233  | 0.011779926 |
| ENSG00000176444 | 1997.785649 | -0.787483    | 0.312709851 | -2.518254534 | 0.011793806 |
| ENSG00000182827 | 2571.306716 | 0.666165029  | 0.264556039 | 2.518048841  | 0.011800696 |
| ENSG00000196705 | 907.7630318 | 1.335116833  | 0.530390747 | 2.517232512  | 0.011828074 |
| ENSG00000219481 | 3735.566393 | 0.886152946  | 0.352109419 | 2.51669765   | 0.011846044 |
| ENSG00000146757 | 1158.302407 | 1.223542819  | 0.486200662 | 2.516538775  | 0.011851386 |
| ENSG00000269430 | 257.5095809 | -1.838429713 | 0.730555255 | -2.516482772 | 0.01185327  |
| ENSG00000095787 | 9288.534903 | 0.740280658  | 0.294211046 | 2.516155211  | 0.011864292 |
| ENSG00000198366 | 9.169007163 | 3.359726563  | 1.335450996 | 2.515799212  | 0.011876282 |
| ENSG00000163625 | 3485.023123 | 0.921257802  | 0.366200364 | 2.515720604  | 0.011878931 |
| ENSG00000154743 | 576.2702682 | -1.370908961 | 0.545002149 | -2.515419371 | 0.011889087 |
| ENSG00000163738 | 561.2676792 | 0.892658577  | 0.354876368 | 2.515407213  | 0.011889497 |
| ENSG00000197976 | 2228.682172 | 0.688246841  | 0.273640884 | 2.515146245  | 0.011898302 |
| ENSG00000164430 | 5.551962474 | 3.896996078  | 1.549521801 | 2.514966924  | 0.011904355 |
| ENSG00000138434 | 36022.0488  | -1.212344319 | 0.482055567 | -2.51494724  | 0.01190502  |
| ENSG00000171792 | 633.2492824 | -0.933536632 | 0.37120085  | -2.514909738 | 0.011906286 |
| ENSG00000168398 | 94.95622319 | 1.586197315  | 0.630760532 | 2.51473774   | 0.011912096 |
| ENSG00000248121 | 31.72408968 | 1.501687893  | 0.597253997 | 2.514320374  | 0.011926204 |
| ENSG00000138162 | 3194.169535 | 1.05885048   | 0.421161385 | 2.514120521  | 0.011932965 |
| ENSG00000091972 | 12.31184844 | 2.614685667  | 1.040089574 | 2.513904313  | 0.011940283 |
| ENSG00000129473 | 2005.216394 | 0.701499443  | 0.279060359 | 2.513791082  | 0.011944117 |
| ENSG00000273142 | 480.3553931 | 1.166822971  | 0.464242119 | 2.51339317   | 0.011957599 |
| ENSG00000162191 | 3284.229711 | 0.806856503  | 0.321068607 | 2.513034553  | 0.011969761 |
| ENSG00000105879 | 3448.55468  | 1.174998985  | 0.467589711 | 2.512884601  | 0.01197485  |
| ENSG00000181634 | 4.412623848 | -5.595101703 | 2.227648568 | -2.511662649 | 0.01201639  |
| ENSG00000225330 | 5.142204917 | 4.044528993  | 1.610710505 | 2.511021677  | 0.01203823  |
| ENSG00000217527 | 4.337570247 | 4.562886564  | 1.81733068  | 2.510762964  | 0.012047056 |
| ENSG00000226803 | 37.16948275 | 1.327982392  | 0.529078126 | 2.509992998  | 0.012073356 |
| ENSG00000136881 | 20.25033682 | 2.053021911  | 0.818198244 | 2.509198628  | 0.012100542 |
| ENSG00000134463 | 326.8313868 | -0.905686875 | 0.361078838 | -2.508280135 | 0.012132044 |
| ENSG00000224746 | 10.29540843 | 2.514600222  | 1.002529845 | 2.508254726  | 0.012132917 |
| ENSG00000148735 | 56.39673952 | 2.104029094  | 0.838923743 | 2.508009949  | 0.012141325 |
| ENSG00000144031 | 9.556395108 | 2.343547388  | 0.934565999 | 2.507631766  | 0.012154326 |
| ENSG00000171453 | 1270.139582 | -0.82955664  | 0.330841471 | -2.507414314 | 0.012161806 |
| ENSG00000176387 | 207.973696  | -2.134624286 | 0.851560228 | -2.506721447 | 0.01218567  |
| ENSG00000234817 | 14.81153668 | 2.481836057  | 0.990077007 | 2.506710124  | 0.01218606  |
| ENSG00000213931 | 5336.478272 | 0.854018174  | 0.34071408  | 2.506553808  | 0.01219145  |
| ENSG00000030110 | 1580.114124 | 1.244619899  | 0.49658558  | 2.506355294  | 0.012198298 |
| ENSG00000273366 | 14.49012429 | -2.040561241 | 0.814166199 | -2.506320262 | 0.012199506 |
| ENSG00000157212 | 985.0231071 | -0.762023555 | 0.304081576 | -2.505983974 | 0.012211115 |
| ENSG00000247137 | 71.28263015 | 1.552042999  | 0.61936955  | 2.505843237  | 0.012215977 |
| ENSG00000186687 | 864.0798009 | -1.049735702 | 0.418960071 | -2.505574577 | 0.012225261 |
| ENSG00000127955 | 3848.007045 | -0.931516996 | 0.371784203 | -2.505531401 | 0.012226754 |
| ENSG00000035141 | 2421.931008 | -0.639979537 | 0.255437185 | -2.505428244 | 0.012230321 |
| ENSG00000121741 | 2996.623071 | 0.695351232  | 0.277599413 | 2.504872844  | 0.012249542 |
| ENSG00000103257 | 30450.14143 | 0.964012904  | 0.384877354 | 2.504727531  | 0.012254576 |
| ENSG00000103494 | 567.9673703 | -0.963808931 | 0.384827421 | -2.504522489 | 0.012261681 |

|                 |             |              |             |              |             |
|-----------------|-------------|--------------|-------------|--------------|-------------|
| ENSG00000177051 | 1484.349143 | 0.829376677  | 0.331177858 | 2.504324059  | 0.012268561 |
| ENSG00000076053 | 1237.144603 | 0.678306946  | 0.270981351 | 2.503149916  | 0.012309339 |
| ENSG00000022277 | 3004.771104 | 1.002407546  | 0.400491843 | 2.50294123   | 0.012316599 |
| ENSG00000094804 | 2786.267762 | -1.05282653  | 0.420640719 | -2.502911587 | 0.012317631 |
| ENSG00000197779 | 614.8806326 | 1.150592417  | 0.459775021 | 2.502511801  | 0.012331551 |
| ENSG00000090097 | 1211.363678 | -0.904498445 | 0.361452136 | -2.502401716 | 0.012335387 |
| ENSG00000181090 | 2310.81773  | -0.671450711 | 0.268331968 | -2.502313522 | 0.012338461 |
| ENSG00000255284 | 86.86185115 | -1.700959243 | 0.679919476 | -2.501706899 | 0.01235962  |
| ENSG00000127720 | 217.1452826 | 1.025373649  | 0.409875077 | 2.501673578  | 0.012360783 |
| ENSG00000108479 | 847.8996761 | -1.737664819 | 0.694636731 | -2.501544681 | 0.012365284 |
| ENSG00000259656 | 12.15588821 | 2.532667605  | 1.012482552 | 2.501443211  | 0.012368828 |
| ENSG00000215895 | 39.62814151 | 1.947895965  | 0.778780552 | 2.501212902  | 0.012376875 |
| ENSG00000168970 | 127.5943609 | -0.971178116 | 0.388297001 | -2.501121854 | 0.012380057 |
| ENSG00000115486 | 1546.911942 | 0.854999025  | 0.341899475 | 2.500732191  | 0.012393686 |
| ENSG00000140285 | 7.573415688 | 3.787915124  | 1.514820207 | 2.500570765  | 0.012399336 |
| ENSG00000139496 | 9380.300688 | 0.862742756  | 0.345020607 | 2.500554278  | 0.012399913 |
| ENSG00000243989 | 55.29249107 | -1.358262283 | 0.543251807 | -2.500244391 | 0.012410766 |
| ENSG00000163795 | 816.2050243 | 0.969395821  | 0.387762818 | 2.499971053  | 0.012420345 |
| ENSG00000152455 | 565.4643893 | -0.724943778 | 0.290041218 | -2.499450879 | 0.012438594 |
| ENSG00000113712 | 7414.886156 | 0.713282753  | 0.285376198 | 2.499447252  | 0.012438722 |
| ENSG00000128594 | 12.46795449 | 2.38296811   | 0.953471832 | 2.499253811  | 0.012445514 |
| ENSG00000253686 | 3.344600011 | 5.209465169  | 2.084836741 | 2.498740101  | 0.012463568 |
| ENSG00000135093 | 769.1865751 | 0.957194562  | 0.383088231 | 2.498626911  | 0.012467549 |
| ENSG00000013619 | 376.2629059 | -0.922207768 | 0.369163045 | -2.498104238 | 0.012485947 |
| ENSG00000173451 | 173.2851596 | 0.977498467  | 0.391300406 | 2.4980768    | 0.012486914 |
| ENSG00000197070 | 1385.31568  | -0.863486147 | 0.345687752 | -2.497878918 | 0.012493886 |
| ENSG00000235313 | 26.45334022 | 1.739078436  | 0.696247653 | 2.497787144  | 0.012497121 |
| ENSG00000163141 | 96.32596788 | 1.298851292  | 0.520111705 | 2.497254491  | 0.01251591  |
| ENSG00000160813 | 358.0394907 | -1.34978153  | 0.540540611 | -2.497095505 | 0.012521523 |
| ENSG00000131043 | 2181.484377 | 1.072900232  | 0.429719085 | 2.496747919  | 0.012533802 |
| ENSG00000126001 | 1487.874221 | -0.83191102  | 0.333262137 | -2.496266238 | 0.012550836 |
| ENSG00000261026 | 10.23487969 | 2.81854243   | 1.129109562 | 2.496252379  | 0.012551327 |
| ENSG00000146090 | 79.79600156 | -1.597685707 | 0.64005182  | -2.496181806 | 0.012553824 |
| ENSG00000102984 | 234.7885218 | 0.978534691  | 0.392017585 | 2.49614999   | 0.01255495  |
| ENSG00000003989 | 803.3476628 | -1.77390994  | 0.710711673 | -2.495962859 | 0.012561575 |
| ENSG00000018699 | 896.9544547 | -0.996428115 | 0.399235309 | -2.495841659 | 0.012565868 |
| ENSG00000174898 | 4.979363524 | 4.007426036  | 1.605645634 | 2.495834668  | 0.012566116 |
| ENSG00000100647 | 930.4901474 | 0.836361479  | 0.335133898 | 2.495603947  | 0.012574291 |
| ENSG00000140263 | 2840.501803 | -0.836072311 | 0.335093987 | -2.495038235 | 0.012594356 |
| ENSG00000104884 | 1531.264868 | -1.158158972 | 0.464188719 | -2.495017487 | 0.012595092 |
| ENSG00000268601 | 5.13076009  | -4.015136372 | 1.609445412 | -2.49473287  | 0.012605199 |
| ENSG00000092445 | 1615.623681 | -0.755409448 | 0.302830223 | -2.49449821  | 0.012613536 |
| ENSG00000145569 | 355.2530124 | -1.171530233 | 0.469672614 | -2.494355001 | 0.012618627 |
| ENSG00000107362 | 1347.542143 | 1.013826492  | 0.406644042 | 2.493154667  | 0.012661368 |
| ENSG00000165555 | 52.35321446 | 1.568041201  | 0.629152962 | 2.492305202  | 0.012691693 |
| ENSG00000146221 | 37.58342148 | 1.832918524  | 0.735509056 | 2.492040728  | 0.012701147 |
| ENSG00000134262 | 755.3265745 | 1.123861318  | 0.450990391 | 2.491985065  | 0.012703138 |

|                 |             |              |             |              |             |
|-----------------|-------------|--------------|-------------|--------------|-------------|
| ENSG00000105711 | 298.2220871 | -0.925135582 | 0.371308463 | -2.491555336 | 0.012718515 |
| ENSG00000164815 | 1021.342168 | -0.853850664 | 0.342745148 | -2.491211532 | 0.01273083  |
| ENSG00000248213 | 92.60820155 | 1.461665165  | 0.586759658 | 2.491079856  | 0.012735549 |
| ENSG00000157593 | 1558.479676 | -1.112962005 | 0.446787722 | -2.491030862 | 0.012737306 |
| ENSG00000111224 | 224.9711172 | 0.904095532  | 0.362991164 | 2.490681928  | 0.01274982  |
| ENSG00000013523 | 1021.936759 | -1.099339386 | 0.441425896 | -2.490427941 | 0.012758937 |
| ENSG00000246560 | 49.00420282 | 1.376999189  | 0.552993123 | 2.490083748  | 0.0127713   |
| ENSG00000162004 | 180.386199  | -1.669361909 | 0.670451257 | -2.489907943 | 0.012777619 |
| ENSG00000066697 | 1425.098088 | 1.008015542  | 0.404948787 | 2.489242032  | 0.012801578 |
| ENSG00000228146 | 6.860319002 | -2.939698244 | 1.180973072 | -2.489216999 | 0.01280248  |
| ENSG00000140157 | 2993.359698 | 0.989049069  | 0.397398285 | 2.488810612  | 0.012817122 |
| ENSG00000129007 | 523.4392153 | -0.791485    | 0.318106217 | -2.488115469 | 0.012842203 |
| ENSG00000100744 | 1285.68054  | 0.789206711  | 0.317335309 | 2.486980456  | 0.012883248 |
| ENSG00000146828 | 1191.250696 | -1.054077085 | 0.423848743 | -2.486918037 | 0.012885508 |
| ENSG00000054148 | 1083.102792 | -1.155028271 | 0.464504245 | -2.486582809 | 0.012897655 |
| ENSG00000133980 | 5.457997024 | 3.889887725  | 1.564718454 | 2.485998497  | 0.012918851 |
| ENSG00000144583 | 70.00647381 | -2.550871428 | 1.026112749 | -2.485956275 | 0.012920384 |
| ENSG00000106330 | 494.7482221 | -1.13625946  | 0.457084619 | -2.485884257 | 0.012922999 |
| ENSG00000128536 | 197.6448498 | -1.267543957 | 0.509924483 | -2.485748376 | 0.012927934 |
| ENSG00000099800 | 1196.621138 | -0.897108416 | 0.360913374 | -2.485661328 | 0.012931096 |
| ENSG00000242687 | 106.2441203 | 1.405876528  | 0.565664319 | 2.485354794  | 0.012942237 |
| ENSG00000130517 | 2322.000862 | 0.893938029  | 0.359684811 | 2.48533717   | 0.012942878 |
| ENSG00000152795 | 9271.788339 | -0.746405247 | 0.30038417  | -2.48483549  | 0.012961132 |
| ENSG00000146701 | 8554.506653 | -0.783727567 | 0.315424052 | -2.484679156 | 0.012966824 |
| ENSG00000242779 | 8.56353075  | 3.50327226   | 1.40999902  | 2.484591981  | 0.01297     |
| ENSG00000232411 | 12.37034315 | 2.810529457  | 1.131289856 | 2.4843584    | 0.012978511 |
| ENSG00000139354 | 1255.790022 | -1.019334294 | 0.410352524 | -2.484045387 | 0.012989925 |
| ENSG00000112578 | 1300.986748 | -0.801483757 | 0.322670357 | -2.483908854 | 0.012994906 |
| ENSG00000164187 | 220.7071621 | 0.824931869  | 0.332145878 | 2.483643257  | 0.013004602 |
| ENSG00000150867 | 3383.5032   | -0.648054695 | 0.260929939 | -2.483634869 | 0.013004908 |
| ENSG00000147223 | 8.663923851 | 3.146424532  | 1.266913585 | 2.483535239  | 0.013008546 |
| ENSG00000151576 | 1886.91197  | -0.673205709 | 0.271076812 | -2.483449998 | 0.01301166  |
| ENSG00000011523 | 891.726105  | -0.810775671 | 0.326494805 | -2.483272808 | 0.013018135 |
| ENSG00000137841 | 54.63395575 | -2.310373417 | 0.930398864 | -2.483207477 | 0.013020523 |
| ENSG00000264769 | 61.605239   | 1.942561702  | 0.782288505 | 2.483178125  | 0.013021596 |
| ENSG00000173141 | 988.4904032 | -0.864138201 | 0.348124687 | -2.482266365 | 0.013054965 |
| ENSG00000144036 | 2982.30708  | 0.917086159  | 0.369472734 | 2.482148412  | 0.013059287 |
| ENSG00000065054 | 1174.075894 | -1.204029966 | 0.485092043 | -2.482064968 | 0.013062346 |
| ENSG00000105821 | 1754.885308 | 0.868657269  | 0.349976856 | 2.482042036  | 0.013063186 |
| ENSG00000115137 | 338.0676493 | 0.781769632  | 0.314972778 | 2.482022847  | 0.01306389  |
| ENSG00000122861 | 1838.055791 | -1.350722455 | 0.544293664 | -2.481606058 | 0.013079178 |
| ENSG00000141431 | 5.704392332 | 4.970540565  | 2.003313862 | 2.481159173  | 0.013095588 |
| ENSG00000153827 | 11829.28047 | 0.978584439  | 0.394436491 | 2.480968319  | 0.013102602 |
| ENSG00000171428 | 301.2595952 | 1.077474595  | 0.434538052 | 2.479586289  | 0.01315349  |
| ENSG00000015676 | 2136.260575 | -0.716899471 | 0.289186768 | -2.479018921 | 0.013174432 |
| ENSG00000108296 | 1702.894345 | 0.926149979  | 0.373655572 | 2.47861948   | 0.013189193 |
| ENSG00000221817 | 125.2600254 | 1.139656725  | 0.459803574 | 2.478573004  | 0.013190911 |

|                 |             |              |             |              |             |
|-----------------|-------------|--------------|-------------|--------------|-------------|
| ENSG00000149292 | 305.8658279 | -0.951524274 | 0.38390154  | -2.478563317 | 0.01319127  |
| ENSG00000170264 | 453.9650237 | -1.149620769 | 0.463887546 | -2.478231584 | 0.013203541 |
| ENSG00000053900 | 1076.39208  | -1.186803352 | 0.478964074 | -2.477854636 | 0.013217498 |
| ENSG00000259726 | 109.2441705 | 1.180961322  | 0.476672739 | 2.477509673  | 0.013230282 |
| ENSG00000094975 | 2984.016866 | 0.761319991  | 0.307310001 | 2.477368092  | 0.013235532 |
| ENSG00000133083 | 315.8940007 | -1.479725982 | 0.597308198 | -2.477324078 | 0.013237165 |
| ENSG00000123901 | 68.57642132 | 1.435591097  | 0.579564431 | 2.477017258  | 0.01324855  |
| ENSG00000215863 | 14.49535701 | 1.976553662  | 0.798035205 | 2.476775021  | 0.013257544 |
| ENSG00000233280 | 524.1395823 | 0.926356726  | 0.37404408  | 2.476597744  | 0.01326413  |
| ENSG00000104957 | 1386.825283 | 0.692623579  | 0.279680828 | 2.476478577  | 0.013268559 |
| ENSG00000213699 | 2751.746962 | 0.829695129  | 0.335046425 | 2.476358701  | 0.013273015 |
| ENSG00000169136 | 720.3099655 | 1.028040789  | 0.415190423 | 2.476070575  | 0.013283732 |
| ENSG00000254233 | 5.697994186 | 4.97321039   | 2.008611284 | 2.475944663  | 0.013288417 |
| ENSG00000177239 | 2342.225908 | -0.972638171 | 0.392861297 | -2.475780077 | 0.013294544 |
| ENSG00000128805 | 378.364321  | -0.798786723 | 0.322644281 | -2.475750448 | 0.013295647 |
| ENSG00000263607 | 5.919906123 | 4.12113632   | 1.664629861 | 2.475707313  | 0.013297254 |
| ENSG00000225892 | 310.2382582 | 1.072614562  | 0.433291988 | 2.475500565  | 0.013304955 |
| ENSG00000159915 | 64.41488965 | 1.600509055  | 0.646630855 | 2.475151073  | 0.013317983 |
| ENSG00000131263 | 5894.60412  | 0.777951941  | 0.314315219 | 2.475069277  | 0.013321033 |
| ENSG00000063854 | 1082.028608 | -0.896160032 | 0.362084736 | -2.475000854 | 0.013323586 |
| ENSG00000250420 | 133.9279044 | -1.587445751 | 0.641449398 | -2.474779391 | 0.01333185  |
| ENSG00000182446 | 16040.87824 | 1.22265678   | 0.494069568 | 2.474665228  | 0.013336112 |
| ENSG00000184047 | 316.6198287 | 1.055678058  | 0.426627772 | 2.474471018  | 0.013343365 |
| ENSG00000251556 | 24.25821542 | 2.193902177  | 0.886655395 | 2.474357218  | 0.013347616 |
| ENSG00000213020 | 476.3287291 | 0.951401409  | 0.384550369 | 2.474061878  | 0.013358656 |
| ENSG00000167395 | 1568.299193 | 1.106727165  | 0.447392499 | 2.473727581  | 0.013371161 |
| ENSG00000214783 | 108.7644446 | 1.135068875  | 0.458916825 | 2.473365136  | 0.013384731 |
| ENSG00000183386 | 904.0380664 | 0.812220907  | 0.328401859 | 2.473253071  | 0.013388929 |
| ENSG00000110048 | 5980.258494 | 0.778324651  | 0.314725944 | 2.473023489  | 0.013397534 |
| ENSG00000251361 | 99.96328625 | -1.17071385  | 0.473403745 | -2.472971246 | 0.013399492 |
| ENSG00000240024 | 438.0589648 | 1.012713102  | 0.409518591 | 2.4729356    | 0.013400829 |
| ENSG00000010810 | 1263.576571 | 0.9458146    | 0.382467554 | 2.472927678  | 0.013401126 |
| ENSG00000164032 | 9888.809881 | -0.906675337 | 0.366657214 | -2.472814667 | 0.013405364 |
| ENSG00000170854 | 1155.880263 | -1.327006863 | 0.53664373  | -2.472789282 | 0.013406316 |
| ENSG00000235493 | 15.58090062 | 1.819733618  | 0.736003571 | 2.47245216   | 0.013418967 |
| ENSG00000140365 | 1109.501153 | -1.046962023 | 0.423480705 | -2.472277986 | 0.013425507 |
| ENSG00000047621 | 966.9908183 | 1.262896055  | 0.510825726 | 2.472264005  | 0.013426033 |
| ENSG00000069812 | 619.5036163 | -1.211384338 | 0.490085234 | -2.471782973 | 0.013444111 |
| ENSG00000082497 | 113.065324  | -1.842253816 | 0.745385898 | -2.471543695 | 0.013453111 |
| ENSG00000126012 | 6141.791113 | 0.812321036  | 0.328709325 | 2.471244273  | 0.013464381 |
| ENSG00000103269 | 148.4992833 | -1.19387894  | 0.483116918 | -2.471200855 | 0.013466016 |
| ENSG00000033867 | 2467.161468 | -0.919647975 | 0.372172982 | -2.471022935 | 0.013472718 |
| ENSG00000108924 | 137.4345971 | -0.967951019 | 0.391733566 | -2.470942249 | 0.013475758 |
| ENSG00000128578 | 718.0328974 | -0.728331154 | 0.294758853 | -2.470939033 | 0.013475879 |
| ENSG00000147155 | 1643.314349 | -1.000437114 | 0.404987999 | -2.470288297 | 0.01350042  |
| ENSG00000071626 | 5999.883113 | -0.848212407 | 0.343371528 | -2.470246768 | 0.013501988 |
| ENSG00000132004 | 180.2689023 | -0.934449976 | 0.378356138 | -2.469762964 | 0.013520261 |

|                 |             |              |             |              |             |
|-----------------|-------------|--------------|-------------|--------------|-------------|
| ENSG00000131381 | 2383.109897 | 1.142814324  | 0.462803913 | 2.469327273  | 0.013536735 |
| ENSG00000132498 | 15.54874073 | -2.134984707 | 0.864650192 | -2.469188958 | 0.013541969 |
| ENSG00000168291 | 1562.04843  | -0.784286241 | 0.317644776 | -2.469067027 | 0.013546584 |
| ENSG00000166667 | 28.2337738  | 1.66443271   | 0.674261166 | 2.468528209  | 0.013566996 |
| ENSG00000151466 | 378.2300123 | -1.034642742 | 0.419179904 | -2.468254641 | 0.01357737  |
| ENSG00000240270 | 7.964947163 | 3.374194395  | 1.367239061 | 2.467889113  | 0.013591241 |
| ENSG00000100403 | 3251.689747 | -0.623200015 | 0.252534433 | -2.467782347 | 0.013595296 |
| ENSG00000198585 | 1079.515427 | -0.725856264 | 0.294173412 | -2.467443472 | 0.013608171 |
| ENSG00000132196 | 628.6705068 | -0.972877208 | 0.39428616  | -2.467439406 | 0.013608325 |
| ENSG00000185728 | 4578.57431  | 0.918103379  | 0.372156567 | 2.466981536  | 0.013625738 |
| ENSG00000221164 | 8.321173127 | -2.7558055   | 1.117097084 | -2.466934646 | 0.013627523 |
| ENSG00000244357 | 3.761784796 | 4.353453292  | 1.765003102 | 2.466541439  | 0.013642494 |
| ENSG00000176490 | 1552.693443 | -1.152433543 | 0.467380024 | -2.465731279 | 0.013673387 |
| ENSG00000139370 | 793.0800883 | -0.814141505 | 0.330252028 | -2.465212735 | 0.013693193 |
| ENSG00000259155 | 6.584137245 | -4.10819466  | 1.666549342 | -2.465090325 | 0.013697872 |
| ENSG00000181788 | 1946.313376 | 0.74266474   | 0.301440217 | 2.46372149   | 0.013750291 |
| ENSG00000185928 | 87.27284036 | -1.107224192 | 0.449471917 | -2.463389037 | 0.013763049 |
| ENSG00000107862 | 9128.283337 | 0.925317117  | 0.375655895 | 2.463204037  | 0.013770153 |
| ENSG00000228343 | 223.4311392 | -0.787391413 | 0.319726981 | -2.462699305 | 0.013789551 |
| ENSG00000160505 | 86.2913982  | 1.695838774  | 0.688621032 | 2.462658988  | 0.013791101 |
| ENSG00000164615 | 2163.838777 | 0.758687872  | 0.308137412 | 2.462173828  | 0.013809772 |
| ENSG00000242265 | 646.6737458 | -1.320897876 | 0.536507617 | -2.462030051 | 0.013815309 |
| ENSG00000239300 | 12.8158522  | 2.050020933  | 0.832861528 | 2.46141869   | 0.013838876 |
| ENSG00000130731 | 677.9050184 | -1.305527392 | 0.530481281 | -2.461024428 | 0.013854093 |
| ENSG00000006327 | 6978.700533 | 0.918226929  | 0.373141469 | 2.46080108   | 0.01386272  |
| ENSG00000186767 | 329.7816857 | -1.336935334 | 0.543346444 | -2.460557805 | 0.013872122 |
| ENSG00000260367 | 14.12591462 | 2.34505638   | 0.953060922 | 2.460552444  | 0.01387233  |
| ENSG00000009830 | 1042.693428 | -0.670318096 | 0.272452669 | -2.460310258 | 0.013881695 |
| ENSG00000133313 | 2624.32429  | -0.756720461 | 0.307579651 | -2.460242276 | 0.013884325 |
| ENSG00000196132 | 362.4696153 | -1.715149587 | 0.697163294 | -2.460183435 | 0.013886602 |
| ENSG00000151883 | 1305.651549 | 0.713562987  | 0.290049298 | 2.460143814  | 0.013888135 |
| ENSG00000129691 | 1602.5601   | -0.892454391 | 0.362778113 | -2.460055772 | 0.013891543 |
| ENSG00000169750 | 2725.378773 | -1.219069597 | 0.495557011 | -2.459998688 | 0.013893752 |
| ENSG00000196821 | 5635.110058 | 0.826135361  | 0.33590683  | 2.459418171  | 0.013916242 |
| ENSG00000005022 | 11033.26275 | -0.861747597 | 0.350396698 | -2.459348507 | 0.013918943 |
| ENSG00000229164 | 4.143731853 | 5.521613207  | 2.245236764 | 2.459256545  | 0.013922509 |
| ENSG00000148737 | 5160.195626 | -1.035317851 | 0.420999185 | -2.459192055 | 0.01392501  |
| ENSG00000224295 | 10.19818285 | 2.751040585  | 1.118884126 | 2.458735915  | 0.013942714 |
| ENSG00000110719 | 1119.888731 | -1.098279531 | 0.44672694  | -2.458503019 | 0.01395176  |
| ENSG00000272068 | 1107.072337 | 1.183353196  | 0.481534115 | 2.457464923  | 0.013992147 |
| ENSG00000237101 | 5.779923008 | 3.425018069  | 1.394322406 | 2.456403235  | 0.014033559 |
| ENSG00000165716 | 211.0296182 | -1.036585812 | 0.421998731 | -2.456371869 | 0.014034784 |
| ENSG00000198964 | 1330.649499 | 0.65152814   | 0.265252118 | 2.456259896  | 0.014039158 |
| ENSG00000188706 | 2255.647452 | 0.702835508  | 0.286197442 | 2.455771453  | 0.014058253 |
| ENSG00000149474 | 369.4573708 | -1.295575319 | 0.527569299 | -2.455744337 | 0.014059314 |
| ENSG00000171174 | 68.62229743 | 1.170215003  | 0.476673365 | 2.454962014  | 0.014089948 |
| ENSG00000152443 | 881.8006665 | 0.97674636   | 0.397980563 | 2.454256443  | 0.014117626 |



|                 |             |              |             |              |             |
|-----------------|-------------|--------------|-------------|--------------|-------------|
| ENSG00000188315 | 793.3140016 | 0.913212283  | 0.372118757 | 2.454088289  | 0.01412423  |
| ENSG00000271324 | 6.168788454 | 3.619057733  | 1.474850643 | 2.453846937  | 0.014133713 |
| ENSG00000254093 | 367.9090532 | -0.831005339 | 0.338668441 | -2.453743069 | 0.014137795 |
| ENSG00000259067 | 4.275190042 | 5.568040563  | 2.2693911   | 2.453539437  | 0.014145803 |
| ENSG00000130383 | 5.340259081 | 3.416660654  | 1.392933638 | 2.452852427  | 0.014172847 |
| ENSG00000135749 | 1459.822644 | 0.79935964   | 0.325993606 | 2.452071526  | 0.014203643 |
| ENSG00000207425 | 81.83797422 | 1.242635268  | 0.506774413 | 2.452048163  | 0.014204565 |
| ENSG00000073849 | 788.1505489 | -1.330804141 | 0.542754982 | -2.451942747 | 0.014208727 |
| ENSG00000122390 | 114.0902872 | 1.221459336  | 0.498187624 | 2.45180586   | 0.014214133 |
| ENSG00000169020 | 423.3543694 | -0.827241056 | 0.337434798 | -2.451558227 | 0.014223917 |
| ENSG00000186265 | 15.84822902 | 3.021254874  | 1.232407534 | 2.451506333  | 0.014225968 |
| ENSG00000077684 | 1280.427966 | -0.899979356 | 0.36711529  | -2.451489711 | 0.014226625 |
| ENSG00000197540 | 20.51366213 | 1.819718752  | 0.742319906 | 2.451394253  | 0.014230399 |
| ENSG00000228897 | 11.07800031 | 2.620304382  | 1.068938952 | 2.451313405  | 0.014233596 |
| ENSG00000152022 | 866.154136  | -0.660894319 | 0.269611192 | -2.451286666 | 0.014234654 |
| ENSG00000125650 | 377.5812117 | 1.220032926  | 0.497715523 | 2.451265571  | 0.014235488 |
| ENSG00000010818 | 1904.302766 | 0.700633706  | 0.285880319 | 2.450793775  | 0.014254159 |
| ENSG00000033327 | 569.4015171 | 0.975173325  | 0.398029008 | 2.450005664  | 0.014285397 |
| ENSG00000086504 | 1216.539684 | -0.712048498 | 0.290632305 | -2.449997764 | 0.01428571  |
| ENSG00000148985 | 713.1689635 | -0.807708251 | 0.329690994 | -2.449894795 | 0.014289796 |
| ENSG00000174547 | 2165.745766 | -0.922826994 | 0.376709848 | -2.449702335 | 0.014297436 |
| ENSG00000198171 | 1855.175866 | 1.099444403  | 0.448838337 | 2.44953319   | 0.014304153 |
| ENSG00000198911 | 6833.14712  | -1.137335879 | 0.464328955 | -2.449418383 | 0.014308713 |
| ENSG00000076706 | 1617.004215 | -1.227248624 | 0.501109231 | -2.449064092 | 0.014322796 |
| ENSG00000124091 | 29.77234028 | 2.068503293  | 0.844670473 | 2.448887892  | 0.014329804 |
| ENSG00000143862 | 1920.604365 | 0.774253924  | 0.316233335 | 2.44836277   | 0.014350709 |
| ENSG00000116679 | 3214.347993 | -1.274802685 | 0.520689735 | -2.448296171 | 0.014353362 |
| ENSG00000006194 | 2019.444414 | 0.827107265  | 0.3379001   | 2.447786385  | 0.014373685 |
| ENSG00000099998 | 10.73378912 | -3.856338662 | 1.576081611 | -2.446788692 | 0.014413531 |
| ENSG00000231868 | 15.98696563 | -1.774388791 | 0.725666312 | -2.445185564 | 0.014477763 |
| ENSG00000122733 | 30.03265738 | 1.380461895  | 0.564768467 | 2.444297044  | 0.014513471 |
| ENSG00000154710 | 121.8966062 | 1.056589654  | 0.432271748 | 2.444271824  | 0.014514486 |
| ENSG00000270589 | 45.70433289 | 1.22878788   | 0.50273141  | 2.444223407  | 0.014516434 |
| ENSG00000132952 | 1718.619533 | 0.736202678  | 0.301295888 | 2.443454115  | 0.014547419 |
| ENSG00000103260 | 1500.195519 | -1.329280442 | 0.544038841 | -2.443355772 | 0.014551385 |
| ENSG00000145220 | 1767.584687 | -1.067423928 | 0.436868575 | -2.443352505 | 0.014551516 |
| ENSG00000188039 | 61.98717092 | 1.031566627  | 0.422265008 | 2.442936562  | 0.014568298 |
| ENSG00000116745 | 215.2897059 | -1.240737498 | 0.507925711 | -2.442753874 | 0.014575674 |
| ENSG00000122203 | 5730.439847 | 0.824054712  | 0.337463429 | 2.441908195  | 0.014609861 |
| ENSG00000141428 | 817.2413998 | 0.870721075  | 0.356635334 | 2.441488524  | 0.014626853 |
| ENSG00000243015 | 60.76369427 | -1.135817301 | 0.465304849 | -2.441017547 | 0.014645943 |
| ENSG00000267430 | 5.724945685 | 3.993425252  | 1.6360455   | 2.440901094  | 0.014650667 |
| ENSG00000138600 | 1350.31404  | 0.844458477  | 0.345966286 | 2.44086927   | 0.014651958 |
| ENSG00000103707 | 912.2968269 | -0.778830136 | 0.319088512 | -2.44079654  | 0.014654909 |
| ENSG00000173320 | 845.3843263 | 0.674326211  | 0.276324948 | 2.440337785  | 0.014673534 |
| ENSG00000103249 | 1153.363388 | -0.793089068 | 0.324999156 | -2.440280389 | 0.014675866 |
| ENSG00000153044 | 538.0839938 | -1.238598146 | 0.507585311 | -2.440177282 | 0.014680056 |

|                 |             |              |             |              |             |
|-----------------|-------------|--------------|-------------|--------------|-------------|
| ENSG00000164327 | 2523.985851 | 0.73947332   | 0.303071143 | 2.439933117  | 0.014689981 |
| ENSG00000239332 | 28.47635071 | -1.453087122 | 0.595563952 | -2.439850696 | 0.014693333 |
| ENSG00000232888 | 103.4235574 | 1.761692509  | 0.722089528 | 2.439714802  | 0.014698861 |
| ENSG00000026036 | 139.0752979 | -0.952292149 | 0.390336146 | -2.439671958 | 0.014700604 |
| ENSG00000182979 | 3417.72993  | -0.937635551 | 0.384353876 | -2.439511108 | 0.014707151 |
| ENSG00000113569 | 3531.732163 | -0.989045409 | 0.405600314 | -2.438472299 | 0.014749461 |
| ENSG00000224837 | 22.08315386 | -2.269917943 | 0.931076891 | -2.437948966 | 0.014770859 |
| ENSG00000240871 | 3.000311274 | -5.020621781 | 2.05954937  | -2.437728298 | 0.014779878 |
| ENSG00000133612 | 2578.351513 | -0.777104125 | 0.318863078 | -2.437109153 | 0.01480521  |
| ENSG00000153037 | 551.2886458 | 0.703642278  | 0.288724872 | 2.437068457  | 0.014806876 |
| ENSG00000253797 | 1186.856337 | 0.797657934  | 0.327309471 | 2.437014522  | 0.014809085 |
| ENSG00000086200 | 1422.594812 | -0.912392752 | 0.374407084 | -2.436900347 | 0.014813761 |
| ENSG00000156413 | 11.16632269 | 2.88669599   | 1.184588006 | 2.436877612  | 0.014814693 |
| ENSG00000264125 | 4.43225866  | 4.610427827  | 1.892109593 | 2.436660035  | 0.014823608 |
| ENSG00000242802 | 902.6130893 | 1.059086606  | 0.434720258 | 2.436248568  | 0.014840483 |
| ENSG00000122566 | 46278.13605 | -0.934327937 | 0.383519217 | -2.436195878 | 0.014842645 |
| ENSG00000157823 | 874.4877279 | 0.742942979  | 0.304967485 | 2.436138329  | 0.014845006 |
| ENSG00000219249 | 5.514404571 | -4.889319781 | 2.007135077 | -2.435969476 | 0.014851938 |
| ENSG00000157927 | 113.3119859 | -0.981509639 | 0.402940083 | -2.435869947 | 0.014856025 |
| ENSG00000111348 | 51.0659422  | -1.987512081 | 0.81605954  | -2.435498863 | 0.014871271 |
| ENSG00000139684 | 4006.614413 | -0.831622875 | 0.341494164 | -2.435247694 | 0.014881599 |
| ENSG00000107872 | 440.7123192 | -0.793034576 | 0.325672868 | -2.435064919 | 0.014889118 |
| ENSG00000260349 | 254.104374  | 0.829288908  | 0.340570081 | 2.435002235  | 0.014891698 |
| ENSG00000128833 | 1672.518453 | -0.677012008 | 0.278095661 | -2.434457289 | 0.01491414  |
| ENSG00000076650 | 700.9662907 | 1.010310964  | 0.415026097 | 2.434331171  | 0.014919338 |
| ENSG00000239732 | 7.099594164 | 3.988225527  | 1.638413946 | 2.434198963  | 0.014924789 |
| ENSG00000107331 | 4536.6342   | -1.378837136 | 0.566466107 | -2.434103504 | 0.014928726 |
| ENSG00000069011 | 705.9202379 | -0.700597306 | 0.287831363 | -2.434054783 | 0.014930735 |
| ENSG00000203734 | 27.84735866 | 1.638218889  | 0.67318225  | 2.433544391  | 0.014951802 |
| ENSG00000146232 | 717.0919121 | 0.790474704  | 0.324834027 | 2.433472601  | 0.014954767 |
| ENSG00000258424 | 24.5873394  | 1.937843414  | 0.796329668 | 2.433468816  | 0.014954924 |
| ENSG00000169894 | 734.0009168 | -1.144433608 | 0.47035603  | -2.433122007 | 0.014969256 |
| ENSG00000270010 | 9.42361524  | -2.549863932 | 1.048074048 | -2.432904371 | 0.014978256 |
| ENSG00000198857 | 42.94541816 | 1.887571034  | 0.7759786   | 2.432503982  | 0.014994827 |
| ENSG00000133315 | 715.7505259 | -1.34137499  | 0.551485777 | -2.432292989 | 0.015003565 |
| ENSG00000234699 | 11.7692059  | -2.160762986 | 0.888444969 | -2.43207296  | 0.015012683 |
| ENSG00000127589 | 56.51274798 | -2.017052912 | 0.829457942 | -2.431772378 | 0.015025146 |
| ENSG00000169919 | 1011.123361 | -0.888547305 | 0.365462115 | -2.43129799  | 0.015044835 |
| ENSG00000167130 | 1605.528244 | 1.22105861   | 0.50223623  | 2.431243579  | 0.015047095 |
| ENSG00000255517 | 73.47891698 | 1.149624499  | 0.472955428 | 2.430724823  | 0.015068654 |
| ENSG00000235999 | 226.1240362 | 1.099326611  | 0.452283482 | 2.430614105  | 0.015073259 |
| ENSG00000174373 | 1912.771918 | 0.742325736  | 0.305470399 | 2.430106937  | 0.015094369 |
| ENSG00000075945 | 1118.593635 | 0.931179414  | 0.38322689  | 2.429838401  | 0.015105556 |
| ENSG00000167693 | 3300.086801 | -0.893135181 | 0.367671843 | -2.429163935 | 0.015133688 |
| ENSG00000015153 | 726.6954453 | 0.903390097  | 0.371963747 | 2.428704688  | 0.015152869 |
| ENSG00000241749 | 51.78790284 | -1.783114689 | 0.734364128 | -2.428107013 | 0.015177864 |
| ENSG00000169375 | 3432.78189  | -0.662357032 | 0.272787486 | -2.428106363 | 0.015177891 |

|                 |             |              |             |              |             |
|-----------------|-------------|--------------|-------------|--------------|-------------|
| ENSG00000137842 | 506.937532  | 0.931612261  | 0.383730472 | 2.427777645  | 0.015191654 |
| ENSG00000136444 | 2615.843431 | -1.484438172 | 0.611546047 | -2.427353065 | 0.015209446 |
| ENSG00000173511 | 489.7398763 | -1.350260904 | 0.556324864 | -2.427108675 | 0.015219696 |
| ENSG00000083838 | 219.3666022 | 1.045951407  | 0.4309562   | 2.427048056  | 0.015222239 |
| ENSG00000166226 | 13271.69998 | -0.694633285 | 0.28625531  | -2.426621482 | 0.015240147 |
| ENSG00000129347 | 1639.804219 | -1.022017481 | 0.421177411 | -2.426572401 | 0.015242209 |
| ENSG00000128185 | 708.4244896 | -0.72206996  | 0.297581582 | -2.426460521 | 0.015246909 |
| ENSG00000077348 | 600.1414144 | -1.536249908 | 0.633370168 | -2.425516681 | 0.015286613 |
| ENSG00000250959 | 78.90449101 | 1.235477242  | 0.509485538 | 2.424950563  | 0.015310471 |
| ENSG00000141401 | 571.8304473 | -1.525515273 | 0.629109696 | -2.424879609 | 0.015313464 |
| ENSG00000168502 | 1753.242795 | -1.263138489 | 0.520976564 | -2.424559138 | 0.015326987 |
| ENSG00000103832 | 8.953429929 | -2.938793699 | 1.212241948 | -2.424263327 | 0.015339478 |
| ENSG00000122877 | 540.5017001 | 1.546182476  | 0.637823756 | 2.424153165  | 0.015344132 |
| ENSG00000148341 | 2084.049905 | -0.711650251 | 0.29356718  | -2.424147862 | 0.015344356 |
| ENSG00000225830 | 919.2584685 | 0.825879104  | 0.340693597 | 2.424111025  | 0.015345913 |
| ENSG00000173258 | 293.1281925 | 1.013035182  | 0.418020562 | 2.423409934  | 0.015375565 |
| ENSG00000135637 | 476.0570384 | 1.203442481  | 0.496679396 | 2.422976454  | 0.015393924 |
| ENSG00000039600 | 52.69551027 | 1.832642492  | 0.75650309  | 2.422518184  | 0.015413354 |
| ENSG00000145780 | 2362.278638 | 0.764743032  | 0.315691602 | 2.422437049  | 0.015416797 |
| ENSG00000206538 | 38.51021845 | 2.039674668  | 0.842016567 | 2.422368807  | 0.015419692 |
| ENSG00000056972 | 900.6403369 | 0.723539372  | 0.298695912 | 2.422327667  | 0.015421438 |
| ENSG00000251168 | 6.43287597  | 3.619694371  | 1.494761518 | 2.42158654   | 0.015452921 |
| ENSG00000262921 | 5.638208213 | -3.368837785 | 1.391263846 | -2.421422647 | 0.015459891 |
| ENSG00000161643 | 18.75556941 | 1.908691963  | 0.788309444 | 2.421247112  | 0.015467359 |
| ENSG00000206384 | 7.411395232 | 2.956910723  | 1.221320645 | 2.421076509  | 0.01547462  |
| ENSG00000166569 | 9.809795495 | 3.37978609   | 1.39644763  | 2.420274143  | 0.01550881  |
| ENSG00000159335 | 7699.52241  | -0.995236518 | 0.411327201 | -2.419573797 | 0.015538707 |
| ENSG00000105185 | 1612.635349 | -0.91810109  | 0.379593921 | -2.418640128 | 0.015578644 |
| ENSG00000107874 | 2244.288029 | -0.770868441 | 0.318729563 | -2.418565866 | 0.015581824 |
| ENSG00000109919 | 3214.63255  | -0.693865584 | 0.286910926 | -2.418400697 | 0.0155889   |
| ENSG00000198060 | 3404.128843 | 0.672665879  | 0.278170124 | 2.41818161   | 0.01559829  |
| ENSG00000176095 | 2215.610151 | 0.954459317  | 0.394749232 | 2.41788771   | 0.015610893 |
| ENSG00000222493 | 7.560190168 | -2.54234713  | 1.051546041 | -2.417723077 | 0.015617958 |
| ENSG00000138785 | 806.629627  | 0.766072876  | 0.316890456 | 2.417469068  | 0.015628862 |
| ENSG00000163811 | 4843.373658 | -0.864179824 | 0.357564075 | -2.416853048 | 0.015655336 |
| ENSG00000124209 | 2374.920332 | 0.914311828  | 0.378406535 | 2.416215749  | 0.015682766 |
| ENSG00000136932 | 351.0405572 | 0.775427928  | 0.320993371 | 2.415713215  | 0.015704425 |
| ENSG00000077942 | 675.6855187 | -1.14266503  | 0.473110513 | -2.415218004 | 0.015725794 |
| ENSG00000001617 | 995.2546684 | -0.941188334 | 0.389726276 | -2.414998403 | 0.015735279 |
| ENSG00000119431 | 951.026113  | 0.838699844  | 0.347373413 | 2.414404248  | 0.015760965 |
| ENSG00000100003 | 640.6476658 | 0.731559027  | 0.302998898 | 2.41439501   | 0.015761365 |
| ENSG00000227199 | 4.098267038 | -4.467274507 | 1.850316097 | -2.414330457 | 0.015764158 |
| ENSG00000215009 | 102.1562849 | 1.027954813  | 0.425810283 | 2.41411458   | 0.015773501 |
| ENSG00000213684 | 4.075811044 | -4.451136918 | 1.844199975 | -2.413586909 | 0.01579636  |
| ENSG00000240230 | 997.7088748 | 1.025444641  | 0.424866507 | 2.413569027  | 0.015797135 |
| ENSG00000254477 | 6.487730743 | 3.213642255  | 1.331724626 | 2.413143222  | 0.015815603 |
| ENSG00000105426 | 4270.853578 | -1.039733882 | 0.431045338 | -2.412121857 | 0.01585998  |

|                 |             |              |             |              |             |
|-----------------|-------------|--------------|-------------|--------------|-------------|
| ENSG00000162572 | 125.2388451 | -1.413843975 | 0.586348838 | -2.411267634 | 0.015897178 |
| ENSG00000124224 | 475.8447353 | 0.975709597  | 0.404648584 | 2.41125173   | 0.015897871 |
| ENSG00000107281 | 2077.818574 | -1.017758471 | 0.422096367 | -2.411199314 | 0.015900157 |
| ENSG00000196459 | 877.3271264 | 0.820834599  | 0.340466551 | 2.410911136  | 0.015912725 |
| ENSG00000110455 | 204.1620611 | -1.162351379 | 0.482224983 | -2.410392287 | 0.015935376 |
| ENSG00000226067 | 37.1499991  | 1.379499184  | 0.572439859 | 2.409858716  | 0.015958699 |
| ENSG00000181163 | 50280.18947 | -0.837795793 | 0.347664674 | -2.409781197 | 0.01596209  |
| ENSG00000234689 | 2.762447052 | 4.938729532  | 2.049901252 | 2.40925241   | 0.015985238 |
| ENSG00000250072 | 9.833992237 | -2.90599791  | 1.206305814 | -2.409005972 | 0.015996036 |
| ENSG00000110344 | 4128.685634 | 0.835014654  | 0.346627048 | 2.408971423  | 0.015997551 |
| ENSG00000244002 | 3.970551941 | 5.45960641   | 2.266421907 | 2.408910006  | 0.016000243 |
| ENSG00000196611 | 24.32367453 | 1.964402282  | 0.815517479 | 2.408780108  | 0.016005938 |
| ENSG00000141084 | 2398.789612 | 1.065633143  | 0.442397074 | 2.408770776  | 0.016006348 |
| ENSG00000251429 | 45.0009601  | 1.189015179  | 0.493699087 | 2.408380348  | 0.016023478 |
| ENSG00000133961 | 3361.43157  | 0.826750381  | 0.343359918 | 2.40782438   | 0.016047899 |
| ENSG00000236047 | 6.699562026 | 4.160663449  | 1.728007158 | 2.407781374  | 0.016049789 |
| ENSG00000112200 | 2871.485695 | 0.836001735  | 0.347219406 | 2.407704524  | 0.016053168 |
| ENSG00000169684 | 259.9083625 | -0.832122161 | 0.345707481 | -2.407012306 | 0.016083628 |
| ENSG00000143224 | 319.4792785 | -1.468235706 | 0.609997775 | -2.406952559 | 0.016086259 |
| ENSG00000203814 | 32.70755415 | 1.717067649  | 0.713435564 | 2.406759259  | 0.016094776 |
| ENSG00000180694 | 2140.64699  | -0.759300698 | 0.315507365 | -2.406602133 | 0.016101701 |
| ENSG00000223396 | 133.7476941 | 0.841483831  | 0.34982596  | 2.405435636  | 0.016153197 |
| ENSG00000142632 | 1406.092344 | -1.029006415 | 0.427804363 | -2.405320055 | 0.016158307 |
| ENSG00000109743 | 37.24903594 | 1.816291327  | 0.755173218 | 2.405132072  | 0.016166622 |
| ENSG00000251180 | 23.40292376 | -1.650488485 | 0.686327467 | -2.404811936 | 0.01618079  |
| ENSG00000147130 | 1563.768752 | -1.271950944 | 0.528926793 | -2.404776921 | 0.016182341 |
| ENSG00000257949 | 10.95692136 | 2.268065728  | 0.943193775 | 2.40466571   | 0.016187265 |
| ENSG00000162620 | 36.59991184 | -1.335393887 | 0.555366672 | -2.404526511 | 0.016193432 |
| ENSG00000189007 | 870.6077814 | -1.14097029  | 0.474530264 | -2.404420488 | 0.01619813  |
| ENSG00000244560 | 159.6265727 | -1.201883607 | 0.499947631 | -2.404019005 | 0.01621593  |
| ENSG00000117707 | 3.62837725  | 5.331519965  | 2.21816863  | 2.403568374  | 0.016235931 |
| ENSG00000137440 | 116.8259929 | -1.452583599 | 0.604483623 | -2.403015637 | 0.016260492 |
| ENSG00000171314 | 5210.28113  | -0.857875637 | 0.357015561 | -2.402908248 | 0.016265268 |
| ENSG00000214212 | 21.98643812 | 1.884283047  | 0.784189256 | 2.402842213  | 0.016268205 |
| ENSG00000232139 | 4.001843234 | 5.470522473  | 2.277092545 | 2.402415521  | 0.016287196 |
| ENSG00000230778 | 8.390962188 | -3.030005698 | 1.261413705 | -2.402071332 | 0.016302529 |
| ENSG00000115109 | 1568.929182 | 0.695147227  | 0.289408008 | 2.401962659  | 0.016307373 |
| ENSG00000161202 | 4677.710194 | 0.892574745  | 0.371625682 | 2.401811253  | 0.016314124 |
| ENSG00000103550 | 503.3477101 | -1.422734256 | 0.592492969 | -2.401267747 | 0.016338377 |
| ENSG00000122257 | 5126.486954 | 0.844956559  | 0.351920926 | 2.400984131  | 0.016351046 |
| ENSG00000229180 | 192.9160353 | 1.10986193   | 0.462259025 | 2.400952432  | 0.016352462 |
| ENSG00000130638 | 2675.550309 | -0.853408563 | 0.355514039 | -2.400491876 | 0.016373054 |
| ENSG00000060656 | 2974.422353 | -1.251192115 | 0.52128463  | -2.400209107 | 0.016385709 |
| ENSG00000087303 | 58.02917896 | 1.676442044  | 0.698577818 | 2.399792837  | 0.016404353 |
| ENSG00000165806 | 2282.861534 | 0.690664022  | 0.287894263 | 2.399019749  | 0.016439028 |
| ENSG00000258881 | 121.0394348 | 1.274768781  | 0.53155278  | 2.398197939  | 0.016475959 |
| ENSG00000114331 | 4716.697454 | 0.802988551  | 0.334851167 | 2.398046149  | 0.016482788 |

|                 |             |              |             |              |             |
|-----------------|-------------|--------------|-------------|--------------|-------------|
| ENSG00000100364 | 3101.050485 | -0.870593615 | 0.363060401 | -2.397930515 | 0.016487993 |
| ENSG00000267010 | 124.4341471 | 1.01648191   | 0.423941079 | 2.397696192  | 0.016498543 |
| ENSG00000261559 | 4.376422102 | -4.53586114  | 1.891836727 | -2.397596513 | 0.016503033 |
| ENSG00000170946 | 1070.509841 | 0.733468329  | 0.305920404 | 2.397578978  | 0.016503823 |
| ENSG00000183150 | 30.25988797 | -1.760581218 | 0.734360505 | -2.39743451  | 0.016510332 |
| ENSG00000228626 | 14.00295941 | 2.034716929  | 0.84872756  | 2.397373464  | 0.016513083 |
| ENSG00000059769 | 663.95802   | 0.932768033  | 0.389270666 | 2.396193994  | 0.01656632  |
| ENSG00000132906 | 538.373849  | 0.702019769  | 0.292981406 | 2.396123972  | 0.016569485 |
| ENSG00000153790 | 131.6026108 | 1.088470546  | 0.454285227 | 2.396006915  | 0.016574778 |
| ENSG00000085491 | 1809.571277 | -0.864174472 | 0.360690611 | -2.395888461 | 0.016580135 |
| ENSG00000172159 | 151.8143516 | 1.259454013  | 0.525798254 | 2.395317981  | 0.016605957 |
| ENSG00000215256 | 318.9183041 | -1.100930183 | 0.459640561 | -2.395198068 | 0.016611389 |
| ENSG00000167536 | 122.7789984 | -1.106504279 | 0.46199908  | -2.395035676 | 0.016618748 |
| ENSG00000134324 | 2381.050472 | 0.879694248  | 0.367441319 | 2.394108125  | 0.016660836 |
| ENSG00000251093 | 2.685187628 | 4.907323132  | 2.049821105 | 2.394025078  | 0.016664609 |
| ENSG00000196812 | 224.5366633 | 1.05117047   | 0.439097671 | 2.393933151  | 0.016668787 |
| ENSG00000250762 | 6.586948727 | 4.128126626  | 1.724671445 | 2.393572781  | 0.016685171 |
| ENSG00000095932 | 3.95862578  | 4.442873903  | 1.856464375 | 2.393191037  | 0.016702542 |
| ENSG00000222011 | 113.5097198 | -0.870353941 | 0.363780219 | -2.392526851 | 0.016732804 |
| ENSG00000264644 | 5.987133148 | 3.596983766  | 1.503457604 | 2.392474358  | 0.016735197 |
| ENSG00000065621 | 3052.366782 | -0.770156819 | 0.32192031  | -2.392383443 | 0.016739344 |
| ENSG00000174374 | 778.4445409 | 1.189790728  | 0.497371017 | 2.392159349  | 0.016749569 |
| ENSG00000161847 | 1323.65482  | -0.681518542 | 0.284905816 | -2.39208364  | 0.016753024 |
| ENSG00000067082 | 5521.003658 | -1.144647954 | 0.478520023 | -2.392058638 | 0.016754165 |
| ENSG00000140153 | 1279.945704 | 0.950987086  | 0.397636833 | 2.391597073  | 0.016775247 |
| ENSG00000270172 | 507.219054  | -1.424784251 | 0.595750834 | -2.391577433 | 0.016776145 |
| ENSG00000196268 | 108.7938142 | 1.391925881  | 0.582040531 | 2.391458684  | 0.016781573 |
| ENSG00000267432 | 52.02921584 | -1.893635694 | 0.792064758 | -2.390758678 | 0.0168136   |
| ENSG00000235162 | 1542.546428 | -0.740972474 | 0.309956524 | -2.390569054 | 0.016822285 |
| ENSG00000133069 | 539.5386761 | 0.792505869  | 0.331536011 | 2.390406599  | 0.016829729 |
| ENSG00000162645 | 50.83105278 | 2.137465184  | 0.894214677 | 2.390326662  | 0.016833393 |
| ENSG00000151657 | 814.199172  | 0.800284497  | 0.334807824 | 2.39028015   | 0.016835525 |
| ENSG00000262678 | 20.29384446 | -1.68397223  | 0.704685057 | -2.389680627 | 0.01686303  |
| ENSG00000149328 | 1389.814801 | -1.410786426 | 0.590383331 | -2.389610873 | 0.016866232 |
| ENSG00000083807 | 210.3899381 | -0.918729983 | 0.384491159 | -2.389469723 | 0.016872714 |
| ENSG00000213707 | 16.92789427 | -1.694441209 | 0.709150071 | -2.389397222 | 0.016876045 |
| ENSG00000124788 | 2372.147909 | 0.814165387  | 0.34078219  | 2.389107794  | 0.016889346 |
| ENSG00000168924 | 3593.495116 | -0.738015081 | 0.30893343  | -2.388912982 | 0.016898304 |
| ENSG00000186566 | 3810.540917 | 0.796684721  | 0.333583461 | 2.388262055  | 0.016928266 |
| ENSG00000165494 | 3176.617407 | 0.854416048  | 0.357827279 | 2.38778902   | 0.016950069 |
| ENSG00000168476 | 1613.723581 | -0.951791234 | 0.398700308 | -2.38723476  | 0.016975647 |
| ENSG00000254681 | 404.5909101 | -0.948449663 | 0.397324421 | -2.387091283 | 0.016982274 |
| ENSG00000200674 | 2.664326766 | 4.897333266  | 2.051648333 | 2.387023735  | 0.016985395 |
| ENSG00000197622 | 3368.978257 | 0.806278121  | 0.337813891 | 2.38675242   | 0.016997934 |
| ENSG00000271529 | 681.4892263 | 0.992605782  | 0.415901256 | 2.386638094  | 0.01700322  |
| ENSG00000204524 | 350.0101149 | 0.88469205   | 0.370697982 | 2.386557501  | 0.017006948 |
| ENSG00000163950 | 3839.201607 | -0.770875608 | 0.323019163 | -2.386470207 | 0.017010986 |

|                 |             |              |             |              |             |
|-----------------|-------------|--------------|-------------|--------------|-------------|
| ENSG00000259366 | 93.09416332 | 1.05196904   | 0.440896792 | 2.38597572   | 0.017033876 |
| ENSG00000204070 | 988.0210955 | 0.806326742  | 0.337963096 | 2.385842571  | 0.017040044 |
| ENSG00000206172 | 2.713904956 | -4.878807068 | 2.044950737 | -2.3857822   | 0.017042841 |
| ENSG00000154328 | 1558.370619 | -0.745419851 | 0.312448813 | -2.385734303 | 0.017045061 |
| ENSG00000008441 | 1237.002308 | -1.077175935 | 0.451559256 | -2.385458654 | 0.01705784  |
| ENSG00000105784 | 439.7703501 | 0.782842129  | 0.328185195 | 2.385366985  | 0.017062091 |
| ENSG00000213152 | 4.323138169 | 4.550598113  | 1.908095779 | 2.384889775  | 0.017084239 |
| ENSG00000230424 | 9.581877453 | 2.601835068  | 1.091343686 | 2.384065718  | 0.017122544 |
| ENSG00000160325 | 505.3581868 | 0.852924268  | 0.357829928 | 2.383602379  | 0.017144115 |
| ENSG00000135740 | 384.8926284 | -0.859991328 | 0.360798153 | -2.383580186 | 0.017145149 |
| ENSG00000237575 | 25.02051872 | 1.874464833  | 0.786414243 | 2.383559111  | 0.017146131 |
| ENSG00000086189 | 1748.371311 | -0.821431516 | 0.344697173 | -2.383052661 | 0.017169738 |
| ENSG00000043143 | 942.8527023 | -1.231135056 | 0.516660027 | -2.382872668 | 0.017178135 |
| ENSG00000077721 | 3986.971626 | 1.075554604  | 0.451410655 | 2.38265223   | 0.017188424 |
| ENSG00000236305 | 11.90586582 | -2.591720242 | 1.087748976 | -2.382645537 | 0.017188736 |
| ENSG00000133895 | 2574.907528 | -0.650091001 | 0.272848524 | -2.382607725 | 0.017190502 |
| ENSG00000252743 | 14.54992302 | -2.680289429 | 1.125138151 | -2.382186959 | 0.017210157 |
| ENSG00000260252 | 9.115769914 | 3.078205928  | 1.29242822  | 2.381722931  | 0.017231857 |
| ENSG00000106686 | 35.25753509 | 1.334656401  | 0.560426248 | 2.381502305  | 0.017242183 |
| ENSG00000009780 | 393.5115813 | -1.092236371 | 0.458636865 | -2.38148403  | 0.017243038 |
| ENSG00000169905 | 10379.35067 | 0.863529037  | 0.362612849 | 2.381407719  | 0.017246611 |
| ENSG00000171208 | 555.3869371 | -1.000118824 | 0.420012856 | -2.38116241  | 0.017258101 |
| ENSG00000178695 | 253.1921803 | -1.46228196  | 0.614143835 | -2.381008939 | 0.017265293 |
| ENSG00000198205 | 253.92552   | 0.855259756  | 0.359225756 | 2.38084197   | 0.01727312  |
| ENSG00000124920 | 2526.315998 | -1.123561252 | 0.471952718 | -2.38066486  | 0.017281426 |
| ENSG00000260404 | 710.7526196 | 1.005628199  | 0.42244248  | 2.380509172  | 0.017288731 |
| ENSG00000101442 | 916.0288142 | -0.969301412 | 0.407204691 | -2.380378799 | 0.017294849 |
| ENSG00000169302 | 91.52448917 | 1.313095029  | 0.551644759 | 2.380327206  | 0.017297271 |
| ENSG00000173039 | 4659.152896 | 0.779310123  | 0.327399939 | 2.380300143  | 0.017298542 |
| ENSG00000110090 | 4763.2494   | -0.78196561  | 0.328566897 | -2.379928159 | 0.017316014 |
| ENSG00000182149 | 7021.033213 | 0.720701108  | 0.302845589 | 2.379764254  | 0.017323717 |
| ENSG00000269752 | 3.098027848 | -5.064954968 | 2.128381963 | -2.379720865 | 0.017325757 |
| ENSG00000224376 | 63.5286504  | 1.421284823  | 0.597261352 | 2.379669835  | 0.017328156 |
| ENSG00000213096 | 259.3843929 | 0.905842004  | 0.380715824 | 2.379312721  | 0.017344954 |
| ENSG00000205309 | 160.3611844 | -1.560795118 | 0.656008816 | -2.379228878 | 0.0173489   |
| ENSG00000116668 | 364.8423096 | 0.825621734  | 0.347019579 | 2.37917911   | 0.017351243 |
| ENSG00000214796 | 94.92803377 | -1.202484185 | 0.505465801 | -2.378962499 | 0.017361442 |
| ENSG00000164078 | 1838.661206 | -0.784994455 | 0.329984939 | -2.378879644 | 0.017365345 |
| ENSG00000234750 | 20.97062941 | 2.680866252  | 1.127076926 | 2.378600953  | 0.017378478 |
| ENSG00000147434 | 7.297108057 | 3.031514485  | 1.274627734 | 2.378352835  | 0.017390177 |
| ENSG00000198488 | 4.348815213 | 4.584878831  | 1.927968174 | 2.378088443  | 0.017402651 |
| ENSG00000145692 | 5.550270043 | 3.392010301  | 1.426445836 | 2.377945391  | 0.017409404 |
| ENSG00000229962 | 3.108837514 | 5.105882248  | 2.147240488 | 2.377880949  | 0.017412447 |
| ENSG00000198208 | 289.9358548 | -0.998352822 | 0.419925237 | -2.377453733 | 0.01743263  |
| ENSG00000272911 | 3.788847103 | 4.358268658  | 1.833215626 | 2.377390087  | 0.017435638 |
| ENSG00000163347 | 20.13597592 | 1.604673183  | 0.674981816 | 2.377357648  | 0.017437172 |
| ENSG00000099810 | 6426.090111 | -1.522001407 | 0.640249705 | -2.377199701 | 0.017444641 |

|                 |             |              |             |              |             |
|-----------------|-------------|--------------|-------------|--------------|-------------|
| ENSG00000205534 | 275.5043566 | 0.726237471  | 0.305511496 | 2.377119947  | 0.017448413 |
| ENSG00000182324 | 201.2005021 | 0.933148756  | 0.392574308 | 2.376999046  | 0.017454133 |
| ENSG00000129204 | 39.8632132  | 1.68239574   | 0.707926745 | 2.376511061  | 0.017477237 |
| ENSG00000172262 | 2384.776366 | 0.645093892  | 0.271483473 | 2.376181083  | 0.017492876 |
| ENSG00000182919 | 1629.171915 | 0.672826946  | 0.283165107 | 2.376094125  | 0.017496999 |
| ENSG00000115282 | 807.722217  | -1.010404483 | 0.425340562 | -2.375518754 | 0.017524302 |
| ENSG00000162999 | 79.86156079 | -1.143542217 | 0.481431031 | -2.375298106 | 0.017534782 |
| ENSG00000167619 | 150.5065743 | -1.422787702 | 0.599053148 | -2.37506089  | 0.017546055 |
| ENSG00000226396 | 42.73648904 | 1.385685785  | 0.583605456 | 2.374353721  | 0.0175797   |
| ENSG00000154473 | 7682.024337 | -0.870391862 | 0.366584684 | -2.374326859 | 0.017580979 |
| ENSG00000127884 | 1471.169253 | -0.858625702 | 0.361630498 | -2.374317729 | 0.017581414 |
| ENSG00000233154 | 4.906473058 | 3.981666515  | 1.67725264  | 2.373921746  | 0.01760028  |
| ENSG00000096070 | 2613.602829 | 1.058469745  | 0.445908352 | 2.373738325  | 0.017609025 |
| ENSG00000188306 | 3.918399787 | 5.441650871  | 2.292722493 | 2.373445058  | 0.017623015 |
| ENSG00000130475 | 839.8648335 | -1.224273118 | 0.51588463  | -2.373152921 | 0.01763696  |
| ENSG00000267504 | 3.682404272 | 4.32486623   | 1.822534213 | 2.372995909  | 0.017644459 |
| ENSG00000152642 | 1285.433586 | -1.352539943 | 0.569984467 | -2.372941758 | 0.017647046 |
| ENSG00000129911 | 1586.461471 | -0.918516326 | 0.387093085 | -2.372856455 | 0.017651122 |
| ENSG00000261101 | 21.88131008 | 1.731186012  | 0.729681572 | 2.372522588  | 0.017667083 |
| ENSG00000104852 | 8519.220544 | -0.586208936 | 0.247086241 | -2.372487167 | 0.017668777 |
| ENSG00000108641 | 306.2962985 | -0.887073092 | 0.373913836 | -2.372399754 | 0.017672958 |
| ENSG00000170315 | 16617.27014 | 0.96027242   | 0.404771993 | 2.372378612  | 0.01767397  |
| ENSG00000163935 | 1637.458986 | 0.935404625  | 0.394367405 | 2.371911604  | 0.017696324 |
| ENSG00000169967 | 3381.096072 | 0.631136307  | 0.266102918 | 2.371775219  | 0.017702857 |
| ENSG00000188175 | 4.021208366 | 4.464785315  | 1.882908914 | 2.371216835  | 0.017729626 |
| ENSG00000145088 | 195.6587989 | 0.904855655  | 0.381647552 | 2.370919581  | 0.017743891 |
| ENSG00000006837 | 55.13988569 | 1.255477803  | 0.529613305 | 2.370555631  | 0.017761371 |
| ENSG00000115944 | 4178.991935 | 0.710751448  | 0.299826998 | 2.370538517  | 0.017762193 |
| ENSG00000120690 | 2145.430706 | 0.889202316  | 0.375110317 | 2.370508822  | 0.01776362  |
| ENSG00000168143 | 581.9222046 | 0.823917763  | 0.347641362 | 2.37002225   | 0.017787015 |
| ENSG00000214733 | 21.98002241 | -2.303647251 | 0.972008285 | -2.369987259 | 0.017788698 |
| ENSG00000175854 | 731.1486535 | 0.856275198  | 0.361359684 | 2.369592503  | 0.0178077   |
| ENSG00000165935 | 14.40799096 | -1.729270083 | 0.729778058 | -2.369583553 | 0.017808131 |
| ENSG00000012048 | 1539.354658 | -1.13893407  | 0.480704079 | -2.369303944 | 0.017821601 |
| ENSG00000172014 | 27.45267361 | -1.592859319 | 0.672329982 | -2.369163002 | 0.017828394 |
| ENSG00000164331 | 685.1583836 | 0.657633423  | 0.277589352 | 2.36908735   | 0.017832041 |
| ENSG00000057019 | 30975.1998  | -1.054101359 | 0.444953248 | -2.369015987 | 0.017835483 |
| ENSG00000104894 | 350.3891283 | -1.364215163 | 0.575863814 | -2.368989212 | 0.017836774 |
| ENSG00000135999 | 1182.203036 | 0.805278117  | 0.339965829 | 2.36870311   | 0.017850576 |
| ENSG00000130803 | 2803.647278 | 0.853273951  | 0.360246851 | 2.36858129   | 0.017856456 |
| ENSG00000124575 | 4.033134527 | 5.48164979   | 2.314506246 | 2.36838842   | 0.017865768 |
| ENSG00000165810 | 382.6949665 | -1.174161138 | 0.495901158 | -2.367732196 | 0.017897486 |
| ENSG00000132912 | 5853.702414 | 0.836787651  | 0.353451288 | 2.367476597  | 0.017909853 |
| ENSG00000101955 | 653.5136844 | -1.353304302 | 0.571705567 | -2.367135077 | 0.017926389 |
| ENSG00000263818 | 9.052406393 | -2.767738681 | 1.169242606 | -2.36712096  | 0.017927073 |
| ENSG00000117601 | 21.80630382 | 2.523378089  | 1.066126802 | 2.366864883  | 0.017939481 |
| ENSG00000149476 | 1623.523587 | -1.261436292 | 0.532982153 | -2.366751468 | 0.017944979 |

|                 |             |              |             |              |             |
|-----------------|-------------|--------------|-------------|--------------|-------------|
| ENSG00000255397 | 4.221389512 | -4.479660944 | 1.893032515 | -2.366394084 | 0.017962313 |
| ENSG00000063241 | 967.5183024 | -1.182778053 | 0.499928051 | -2.365896556 | 0.017986469 |
| ENSG00000163817 | 66.37725423 | -1.58938907  | 0.671821384 | -2.365791126 | 0.017991592 |
| ENSG00000207280 | 8.942565989 | -2.702185858 | 1.142269726 | -2.365628534 | 0.017999494 |
| ENSG00000129480 | 471.9845197 | -0.854497386 | 0.361214398 | -2.365623825 | 0.017999723 |
| ENSG00000011332 | 307.4717107 | -0.749987818 | 0.317064963 | -2.365407426 | 0.018010245 |
| ENSG00000166793 | 46.4697232  | 1.239395076  | 0.52399905  | 2.365262067  | 0.018017316 |
| ENSG00000108839 | 76.14664309 | 1.417203167  | 0.599476679 | 2.364067221  | 0.018075532 |
| ENSG00000167280 | 1781.411572 | -0.618601021 | 0.26167153  | -2.364036396 | 0.018077037 |
| ENSG00000099290 | 430.6620681 | 0.856525129  | 0.362344315 | 2.363843156  | 0.018086468 |
| ENSG00000173207 | 2189.364136 | -1.088819067 | 0.460763542 | -2.363075565 | 0.018123974 |
| ENSG00000106853 | 2219.444019 | 0.738173305  | 0.312392905 | 2.362964373  | 0.018129412 |
| ENSG00000146826 | 853.8771726 | 1.018338112  | 0.430988496 | 2.362796507  | 0.018137626 |
| ENSG00000116127 | 1232.178321 | -0.825864682 | 0.349537349 | -2.362736582 | 0.018140559 |
| ENSG00000158710 | 4933.866691 | -0.981309564 | 0.415356395 | -2.362572422 | 0.018148595 |
| ENSG00000117013 | 298.2899949 | -1.281783086 | 0.542542881 | -2.362547056 | 0.018149837 |
| ENSG00000213588 | 706.316953  | -0.974558062 | 0.412665083 | -2.361619875 | 0.018195288 |
| ENSG00000155984 | 183.9366427 | 0.8050835    | 0.340945736 | 2.361324445  | 0.018209791 |
| ENSG00000196091 | 11.57911715 | 3.165006558  | 1.340627068 | 2.360840411  | 0.018233575 |
| ENSG00000251127 | 25.31749336 | 1.449365981  | 0.614011872 | 2.36048527   | 0.018251043 |
| ENSG00000136997 | 8063.594538 | -1.446460476 | 0.612786753 | -2.360463031 | 0.018252137 |
| ENSG00000165632 | 1071.681511 | 0.799974926  | 0.338911506 | 2.360424214  | 0.018254048 |
| ENSG00000074054 | 3201.449636 | 0.835298131  | 0.353892372 | 2.360316856  | 0.018259332 |
| ENSG00000226598 | 5.037349729 | 4.803351732  | 2.03523443  | 2.360097521  | 0.018270131 |
| ENSG00000140199 | 1133.716866 | 0.748297292  | 0.31706224  | 2.360095897  | 0.018270211 |
| ENSG00000125966 | 51.40203162 | 1.182683453  | 0.501119914 | 2.36008073   | 0.018270958 |
| ENSG00000178187 | 6.494771681 | 2.87074921   | 1.216682215 | 2.359489747  | 0.018300087 |
| ENSG00000181555 | 4509.280813 | 0.805008787  | 0.341189292 | 2.35941985   | 0.018303534 |
| ENSG00000155008 | 330.2526119 | 0.920464507  | 0.390187624 | 2.359030503  | 0.01832275  |
| ENSG00000204922 | 269.8944986 | -0.76106518  | 0.322651794 | -2.358781804 | 0.018335033 |
| ENSG00000157353 | 585.0254883 | -0.795795193 | 0.337376707 | -2.358773372 | 0.018335449 |
| ENSG00000102241 | 3120.752311 | -0.748860815 | 0.317513592 | -2.358515776 | 0.01834818  |
| ENSG00000123473 | 1999.252945 | -1.106392973 | 0.469108363 | -2.358501918 | 0.018348865 |
| ENSG00000225886 | 15.65843562 | 2.95572683   | 1.253955287 | 2.357122985  | 0.018417146 |
| ENSG00000067445 | 9.324130104 | -2.663658156 | 1.130076516 | -2.357060002 | 0.01842027  |
| ENSG00000264968 | 7.737347211 | 2.66839382   | 1.132251056 | 2.356715684  | 0.018437357 |
| ENSG00000126804 | 1672.82064  | 0.836878222  | 0.355184386 | 2.356179648  | 0.018463986 |
| ENSG00000213047 | 629.6855911 | 0.672679437  | 0.285500049 | 2.356144736  | 0.018465721 |
| ENSG00000174173 | 1630.525994 | -0.606139872 | 0.257271093 | -2.356035668 | 0.018471144 |
| ENSG00000056736 | 382.6648275 | -1.226712955 | 0.520691288 | -2.355931401 | 0.018476329 |
| ENSG00000105058 | 3347.735907 | 0.834056483  | 0.354062316 | 2.355677079  | 0.018488982 |
| ENSG00000261801 | 299.3817566 | -0.994403124 | 0.422187929 | -2.3553566   | 0.018504938 |
| ENSG00000253305 | 2.966948894 | 5.036274784  | 2.138321403 | 2.355246866  | 0.018510404 |
| ENSG00000169902 | 1106.21768  | 0.872802082  | 0.370593503 | 2.355146742  | 0.018515392 |
| ENSG00000067066 | 2406.556532 | 0.678445392  | 0.28809608  | 2.354927535  | 0.018526318 |
| ENSG00000198399 | 2450.644653 | 0.733344445  | 0.311508911 | 2.354168435  | 0.018564197 |
| ENSG00000267838 | 10.18111519 | 3.043061086  | 1.292783093 | 2.353883728  | 0.018578421 |



|                 |             |              |             |              |             |
|-----------------|-------------|--------------|-------------|--------------|-------------|
| ENSG00000180316 | 16.52239384 | 2.096853898  | 0.890831546 | 2.353816394  | 0.018581787 |
| ENSG00000175573 | 1298.717548 | -1.190537383 | 0.505834254 | -2.35361163  | 0.018592025 |
| ENSG00000106404 | 822.3717061 | 0.908299683  | 0.385919265 | 2.35360026   | 0.018592593 |
| ENSG00000162512 | 3259.350572 | -1.084313639 | 0.460717105 | -2.353534579 | 0.018595878 |
| ENSG00000264584 | 2.977379325 | 5.04101964   | 2.141982491 | 2.353436436  | 0.018600788 |
| ENSG00000163528 | 612.3003436 | -0.819527943 | 0.348267788 | -2.353154588 | 0.018614893 |
| ENSG00000106809 | 3.155343864 | -5.096227155 | 2.165988844 | -2.352840907 | 0.018630603 |
| ENSG00000234741 | 14799.39915 | 0.780088247  | 0.331555835 | 2.352811091  | 0.018632097 |
| ENSG00000082641 | 13911.20782 | 0.864371684  | 0.367379831 | 2.352801137  | 0.018632596 |
| ENSG00000022556 | 2400.43374  | -0.658074062 | 0.279749908 | -2.352365604 | 0.01865443  |
| ENSG00000096433 | 7828.462803 | -1.269075112 | 0.539495938 | -2.352334879 | 0.018655971 |
| ENSG00000271721 | 72.00623871 | 1.173927209  | 0.499051255 | 2.352317919  | 0.018656821 |
| ENSG00000158458 | 34.65402295 | -1.869999463 | 0.794969159 | -2.352291838 | 0.01865813  |
| ENSG00000079459 | 6173.423496 | -0.628637079 | 0.267256915 | -2.35218265  | 0.018663608 |
| ENSG00000173145 | 2334.961039 | -0.715847486 | 0.304338332 | -2.352143688 | 0.018665563 |
| ENSG00000207185 | 2.956518464 | 5.031584056  | 2.139172384 | 2.352117153  | 0.018666895 |
| ENSG00000112773 | 2103.974167 | 0.66626036   | 0.283321296 | 2.351607062  | 0.01869251  |
| ENSG00000161682 | 765.1826348 | -0.898614655 | 0.382149391 | -2.351474783 | 0.018699157 |
| ENSG00000164466 | 5089.06738  | -0.669687132 | 0.284796755 | -2.351456331 | 0.018700084 |
| ENSG00000171954 | 204.4109144 | -0.988318271 | 0.420311767 | -2.351393297 | 0.018703253 |
| ENSG00000196083 | 428.1163759 | 0.969801073  | 0.412455173 | 2.351288419  | 0.018708526 |
| ENSG00000165046 | 527.823007  | 1.353862293  | 0.575814713 | 2.351211702  | 0.018712384 |
| ENSG00000131779 | 537.1193473 | -0.935966322 | 0.398182154 | -2.35059837  | 0.018743253 |
| ENSG00000175832 | 2447.145331 | -0.944249406 | 0.401719044 | -2.350521891 | 0.018747105 |
| ENSG00000205476 | 1043.199136 | -0.827975255 | 0.352267828 | -2.350414055 | 0.018752538 |
| ENSG00000042088 | 932.5099475 | -0.813435047 | 0.34612444  | -2.350123115 | 0.018767202 |
| ENSG00000269546 | 6.643764216 | 4.337283856  | 1.846063568 | 2.349476979  | 0.018799807 |
| ENSG00000201616 | 8.600954539 | 2.449624971  | 1.042666604 | 2.349384704  | 0.018804467 |
| ENSG00000138185 | 1134.009929 | -0.920636869 | 0.391899674 | -2.349164672 | 0.018815583 |
| ENSG00000273365 | 21.46811273 | 2.558076432  | 1.088941575 | 2.349140203  | 0.01881682  |
| ENSG00000013503 | 659.8340794 | -0.684993627 | 0.291634192 | -2.348811102 | 0.018833459 |
| ENSG00000062725 | 3920.362484 | 0.791080094  | 0.336800759 | 2.348807337  | 0.018833649 |
| ENSG00000107185 | 3117.06673  | 0.796341498  | 0.339062902 | 2.348654169  | 0.018841397 |
| ENSG00000185220 | 577.9785979 | 0.827251239  | 0.352233481 | 2.34858775   | 0.018844758 |
| ENSG00000159459 | 2795.275747 | 0.843869372  | 0.359367342 | 2.348208291  | 0.018863969 |
| ENSG00000182963 | 3262.282523 | -0.76236443  | 0.324679295 | -2.348053731 | 0.018871799 |
| ENSG00000222489 | 22.31967254 | -1.411505615 | 0.601237398 | -2.347667692 | 0.018891367 |
| ENSG00000143257 | 31.8639191  | 1.489555456  | 0.634493779 | 2.347628151  | 0.018893373 |
| ENSG00000260941 | 39.05148834 | 2.22422465   | 0.947549429 | 2.347344193  | 0.018907779 |
| ENSG00000105053 | 2160.582366 | 1.125736144  | 0.479615593 | 2.347163352  | 0.018916959 |
| ENSG00000259820 | 342.3551513 | 0.811204782  | 0.345657708 | 2.346844187  | 0.01893317  |
| ENSG00000261428 | 35.50829975 | -1.55081896  | 0.660822784 | -2.346800076 | 0.018935412 |
| ENSG00000054118 | 7625.783477 | -0.710485071 | 0.302787959 | -2.346477295 | 0.018951821 |
| ENSG00000213013 | 2.987809756 | 5.045827074  | 2.150387283 | 2.34647364   | 0.018952007 |
| ENSG00000164266 | 4.043564958 | 5.485449729  | 2.337908677 | 2.346306245  | 0.018960521 |
| ENSG00000271576 | 44.92436037 | -1.626148833 | 0.693075104 | -2.346280834 | 0.018961814 |
| ENSG00000168297 | 853.1952475 | 0.654911872  | 0.279131501 | 2.346248523  | 0.018963458 |

|                 |             |              |             |              |             |
|-----------------|-------------|--------------|-------------|--------------|-------------|
| ENSG00000185947 | 1422.140646 | 1.101194634  | 0.469369313 | 2.346115531  | 0.018970226 |
| ENSG00000177464 | 7.973599313 | 2.52650744   | 1.076908014 | 2.346075438  | 0.018972267 |
| ENSG00000087299 | 718.6222113 | -0.843340771 | 0.359562573 | -2.345463163 | 0.019003456 |
| ENSG00000076321 | 1000.824403 | 0.925343804  | 0.394530367 | 2.345431132  | 0.019005089 |
| ENSG00000138772 | 3698.176889 | -1.019467701 | 0.434718402 | -2.345122028 | 0.019020853 |
| ENSG00000177542 | 2158.01598  | -0.774850078 | 0.330433435 | -2.344950588 | 0.019029601 |
| ENSG00000133059 | 1453.521764 | 0.721765034  | 0.307834554 | 2.344652425  | 0.019044824 |
| ENSG00000132676 | 7664.982964 | 0.968021239  | 0.412931555 | 2.344265599  | 0.01906459  |
| ENSG00000180769 | 159.2451054 | 0.811341233  | 0.346121406 | 2.344094355  | 0.019073346 |
| ENSG00000134461 | 184.5247668 | -1.170670666 | 0.499434465 | -2.343992551 | 0.019078552 |
| ENSG00000229298 | 139.5682428 | -1.737868797 | 0.741431719 | -2.343936404 | 0.019081425 |
| ENSG00000259644 | 9.989287432 | 2.993586321  | 1.277287415 | 2.343706112  | 0.019093209 |
| ENSG00000204710 | 53.28882342 | -1.799256021 | 0.767738341 | -2.343579739 | 0.019099679 |
| ENSG00000174917 | 679.7452732 | -0.869552124 | 0.371044401 | -2.343525793 | 0.019102441 |
| ENSG00000142227 | 1394.938298 | -0.988450352 | 0.421924573 | -2.342718142 | 0.019143839 |
| ENSG00000175336 | 3.785445868 | 4.375408302  | 1.867666935 | 2.342713372  | 0.019144084 |
| ENSG00000118260 | 2347.354493 | 0.597136186  | 0.254894882 | 2.342676246  | 0.019145989 |
| ENSG00000136631 | 1775.175111 | 1.097218731  | 0.468364934 | 2.342657726  | 0.019146939 |
| ENSG00000137463 | 16.43969116 | 1.806599353  | 0.771182588 | 2.342635041  | 0.019148103 |
| ENSG00000233912 | 8.888065446 | 2.387774975  | 1.019276242 | 2.342618102  | 0.019148972 |
| ENSG00000104522 | 2091.666247 | -0.673352626 | 0.287444985 | -2.342544355 | 0.019152757 |
| ENSG00000117222 | 3097.061086 | 0.815102057  | 0.347960139 | 2.342515612  | 0.019154233 |
| ENSG00000075413 | 4757.316098 | 0.786010018  | 0.335583924 | 2.342215948  | 0.01916962  |
| ENSG00000225470 | 656.1817873 | 0.899155456  | 0.383910231 | 2.342098185  | 0.01917567  |
| ENSG00000065357 | 1485.498231 | -1.230548118 | 0.525502157 | -2.341661404 | 0.019198123 |
| ENSG00000147614 | 3.755650306 | 5.379703435  | 2.297603498 | 2.341441176  | 0.019209453 |
| ENSG00000121753 | 764.1234325 | -1.385669631 | 0.591816486 | -2.341383965 | 0.019212397 |
| ENSG00000155275 | 822.45849   | 0.890835359  | 0.380479995 | 2.341346117  | 0.019214345 |
| ENSG00000140043 | 320.0072953 | -0.965070022 | 0.412210711 | -2.341205591 | 0.019221579 |
| ENSG00000084070 | 1709.168518 | 0.68666249   | 0.293403462 | 2.340335334  | 0.019266432 |
| ENSG00000142327 | 1338.383706 | -1.000123809 | 0.427398543 | -2.340026248 | 0.019282385 |
| ENSG00000176454 | 1481.783248 | -1.429826677 | 0.611042826 | -2.339977849 | 0.019284884 |
| ENSG00000155545 | 1960.863046 | 0.757746058  | 0.323874286 | 2.33963019   | 0.019302843 |
| ENSG00000105643 | 1620.559357 | 0.766743061  | 0.327752197 | 2.33939869   | 0.019314809 |
| ENSG00000236861 | 24.66206503 | 1.570310043  | 0.671319721 | 2.339138854  | 0.019328248 |
| ENSG00000256616 | 16.41518377 | -1.909762546 | 0.816560151 | -2.338789793 | 0.019346315 |
| ENSG00000132383 | 5410.725583 | -0.754144337 | 0.322462917 | -2.338700967 | 0.019350915 |
| ENSG00000121060 | 9597.887447 | 0.767679545  | 0.328348058 | 2.338005441  | 0.019386966 |
| ENSG00000204392 | 1244.71282  | -0.954860315 | 0.408506219 | -2.337443768 | 0.019416122 |
| ENSG00000140839 | 52.59132046 | 1.574123154  | 0.673483785 | 2.337284414  | 0.0194244   |
| ENSG00000024048 | 2690.410216 | 0.862701649  | 0.369107507 | 2.337263895  | 0.019425467 |
| ENSG00000267216 | 39.6228933  | 1.608254888  | 0.688161379 | 2.337031598  | 0.019437541 |
| ENSG00000260757 | 56.46395796 | 1.763999234  | 0.754850226 | 2.336886408  | 0.019445091 |
| ENSG00000079332 | 6249.806455 | 0.772367925  | 0.330597818 | 2.336276533  | 0.019476834 |
| ENSG00000130244 | 731.1904116 | -0.889518563 | 0.380770872 | -2.336099285 | 0.019486068 |
| ENSG00000186591 | 8621.571118 | 0.68633759   | 0.293825586 | 2.335867341  | 0.019498157 |
| ENSG00000119599 | 426.3426532 | -1.088215471 | 0.465884546 | -2.335805042 | 0.019501405 |

|                 |             |              |             |              |             |
|-----------------|-------------|--------------|-------------|--------------|-------------|
| ENSG00000158201 | 2616.046435 | 0.901565356  | 0.386038493 | 2.33542865   | 0.019521039 |
| ENSG00000083812 | 455.4549706 | 0.921222694  | 0.394461802 | 2.335391385  | 0.019522984 |
| ENSG00000183251 | 969.920831  | 0.810886727  | 0.347230368 | 2.335298986  | 0.019527807 |
| ENSG00000173011 | 1203.427554 | 0.802327978  | 0.343674539 | 2.334557512  | 0.019566548 |
| ENSG00000138293 | 9021.235277 | 0.786001765  | 0.336715622 | 2.334319274  | 0.01957901  |
| ENSG00000107854 | 3042.510992 | 0.703496121  | 0.301414406 | 2.333983071  | 0.019596608 |
| ENSG00000230736 | 14.10647311 | 2.045974744  | 0.876651831 | 2.333850989  | 0.019603526 |
| ENSG00000197372 | 317.7942623 | 1.178074627  | 0.504784412 | 2.333817366  | 0.019605287 |
| ENSG00000269235 | 5.56222055  | 3.578697395  | 1.533411358 | 2.333814326  | 0.019605446 |
| ENSG00000264462 | 265.5088904 | 1.278127946  | 0.547702841 | 2.333615694  | 0.019615854 |
| ENSG00000237438 | 457.2650577 | 1.034615965  | 0.443409696 | 2.333318315  | 0.019631445 |
| ENSG00000269131 | 155.8347778 | -0.882343681 | 0.378157158 | -2.333272457 | 0.01963385  |
| ENSG00000137513 | 845.1933102 | -1.078588111 | 0.462284343 | -2.333170322 | 0.019639208 |
| ENSG00000100012 | 10.31003607 | 2.680681903  | 1.149032697 | 2.332990097  | 0.019648665 |
| ENSG00000178057 | 586.9914696 | -0.788645414 | 0.338091537 | -2.332638732 | 0.019667114 |
| ENSG00000113460 | 2166.629188 | -0.802380172 | 0.343981052 | -2.332628987 | 0.019667626 |
| ENSG00000171425 | 1049.831246 | 0.671299091  | 0.287843637 | 2.332165818  | 0.01969197  |
| ENSG00000172478 | 5.24770919  | 3.3060891    | 1.41769804  | 2.332012182  | 0.01970005  |
| ENSG00000174574 | 6124.38147  | 0.63197303   | 0.271012849 | 2.331893241  | 0.019706308 |
| ENSG00000174206 | 477.2270322 | -1.261110407 | 0.540880404 | -2.331588272 | 0.019722361 |
| ENSG00000163635 | 2657.906339 | 0.727859652  | 0.312181865 | 2.331524457  | 0.019725722 |
| ENSG00000162482 | 31.80773142 | -1.467021034 | 0.629223374 | -2.331478924 | 0.01972812  |
| ENSG00000164093 | 499.4491214 | 0.791357362  | 0.339437049 | 2.33138181   | 0.019733236 |
| ENSG00000213509 | 4.060116663 | 4.463154659  | 1.914396208 | 2.331364135  | 0.019734167 |
| ENSG00000254862 | 3.828663322 | 5.40641373   | 2.31903916  | 2.331316272  | 0.019736689 |
| ENSG00000253873 | 28.69013411 | 2.010875008  | 0.862669243 | 2.330991889  | 0.019753787 |
| ENSG00000165338 | 411.0910024 | 0.912685159  | 0.391559153 | 2.330899819  | 0.019758643 |
| ENSG00000111269 | 1499.490039 | 0.902423613  | 0.387158431 | 2.330889739  | 0.019759174 |
| ENSG00000039560 | 2436.992143 | -0.758103145 | 0.325306014 | -2.330430768 | 0.019783395 |
| ENSG00000267632 | 80.31190696 | 1.591862436  | 0.683208918 | 2.329979008  | 0.019807261 |
| ENSG00000187730 | 456.2496744 | -1.619677395 | 0.695179921 | -2.329867919 | 0.019813133 |
| ENSG00000091879 | 158.4503881 | -1.236464212 | 0.530744079 | -2.32968065  | 0.019823036 |
| ENSG00000016864 | 1030.264801 | -0.820059721 | 0.352082224 | -2.329171043 | 0.019850006 |
| ENSG00000165985 | 78.86126948 | -1.17735604  | 0.505495245 | -2.329113975 | 0.019853029 |
| ENSG00000037965 | 51.60370518 | -1.244332762 | 0.534350197 | -2.328684015 | 0.019875812 |
| ENSG00000172572 | 43.28908276 | 1.388028701  | 0.596126302 | 2.328413787  | 0.019890142 |
| ENSG00000196466 | 201.2698545 | 1.086960287  | 0.467095236 | 2.327063528  | 0.019961884 |
| ENSG00000138081 | 2518.251733 | 0.651062915  | 0.279850861 | 2.326463864  | 0.019993818 |

| padj     | Gene symbol |
|----------|-------------|
| 9.29E-27 | HMOX1       |
| 7.68E-21 | DDIT3       |
| 1.03E-19 | ATF3        |
| 2.12E-18 | CHAC1       |
| 3.23E-15 | HERPUD1     |
| 8.64E-13 | SPX         |
| 3.99E-11 | DNAJB9      |
| 4.51E-11 | OSGIN1      |
| 9.13E-11 | LUCAT1      |
| 8.72E-10 | TONSL       |
| 1.57E-09 | CYP4F3      |
| 1.77E-09 | SDCBP2      |
| 2.09E-09 | SESN2       |
| 3.88E-09 | SLC7A11-AS1 |
| 5.13E-09 | MAP1LC3B    |
| 5.13E-09 | CBX4        |
| 7.11E-09 | NMRAL2P     |
| 1.39E-08 | BEST1       |
| 4.55E-08 | MCM4        |
| 4.64E-08 | AC112777.1  |
| 5.52E-08 | ZFAND2A     |
| 5.52E-08 | PTPDC1      |
| 7.47E-08 | FANCA       |
| 7.47E-08 | TNFRSF10B   |
| 8.29E-08 | EGR1        |
| 9.25E-08 | BLM         |
| 9.25E-08 | E2F2        |
| 9.64E-08 | HRG         |
| 1.32E-07 | NCAPH       |
| 1.32E-07 | MIR616      |
| 1.32E-07 | KIF18B      |
| 1.32E-07 | NA          |
| 1.32E-07 | SRXN1       |
| 1.41E-07 | CDCA3       |
| 1.80E-07 | PPP1R15A    |
| 1.83E-07 | GTSE1       |
| 1.92E-07 | LY9         |
| 1.92E-07 | CENPF       |
| 1.92E-07 | BTG1        |
| 1.92E-07 | SPC25       |
| 1.92E-07 | SPC24       |
| 1.92E-07 | SQSTM1      |
| 3.02E-07 | MXD1        |
| 3.48E-07 | MCM2        |
| 4.51E-07 | IFRD1       |
| 4.52E-07 | SERPINB8    |

|          |           |
|----------|-----------|
| 4.67E-07 | SLC7A11   |
| 5.20E-07 | NPIPB2    |
| 6.13E-07 | CIT       |
| 6.28E-07 | MCM6      |
| 7.41E-07 | DHFR      |
| 1.08E-06 | CDK1      |
| 1.08E-06 | MKI67     |
| 1.13E-06 | NA        |
| 1.13E-06 | TOP2A     |
| 1.13E-06 | E2F8      |
| 1.15E-06 | STMN1     |
| 1.23E-06 | ZNF367    |
| 1.27E-06 | FEN1      |
| 1.37E-06 | MCM7      |
| 1.47E-06 | GADD45G   |
| 1.57E-06 | RASSF6    |
| 1.57E-06 | ESCO2     |
| 1.84E-06 | LIPH      |
| 1.88E-06 | TYMS      |
| 1.88E-06 | ADM2      |
| 1.99E-06 | ARC       |
| 2.14E-06 | ISL2      |
| 2.15E-06 | DSCC1     |
| 2.15E-06 | HSPA1A    |
| 2.17E-06 | DLGAP5    |
| 2.18E-06 | MCM10     |
| 2.21E-06 | ARHGAP33  |
| 2.45E-06 | E2F1      |
| 2.60E-06 | POLE2     |
| 2.72E-06 | BUB1B     |
| 2.72E-06 | GADD45B   |
| 2.72E-06 | MAP1B     |
| 2.72E-06 | PASK      |
| 2.82E-06 | TRIB3     |
| 2.91E-06 | AURKB     |
| 3.12E-06 | ESPL1     |
| 3.40E-06 | HSPA1B    |
| 3.48E-06 | GADD45A   |
| 3.56E-06 | BIRC5     |
| 3.72E-06 | PKMYT1    |
| 3.83E-06 | LOC729654 |
| 4.02E-06 | SERTAD1   |
| 4.14E-06 | SKA3      |
| 5.26E-06 | EID3      |
| 5.84E-06 | CSRNP1    |
| 6.11E-06 | PBK       |
| 6.20E-06 | SCEL      |

|          |          |
|----------|----------|
| 6.22E-06 | HBEGF    |
| 6.27E-06 | RRM2     |
| 6.39E-06 | STK40    |
| 7.28E-06 | ERCC6L   |
| 7.74E-06 | HELLS    |
| 8.25E-06 | AKR1B10  |
| 8.50E-06 | KIF22    |
| 8.58E-06 | CENPI    |
| 1.01E-05 | RIOK3    |
| 1.01E-05 | TCF19    |
| 1.01E-05 | CDCA7    |
| 1.04E-05 | TMEM97   |
| 1.08E-05 | LMNB1    |
| 1.13E-05 | NCAPD3   |
| 1.13E-05 | GCLM     |
| 1.16E-05 | TRIM16L  |
| 1.17E-05 | SLC9A1   |
| 1.18E-05 | WDHD1    |
| 1.18E-05 | TRIP13   |
| 1.18E-05 | DKK1     |
| 1.18E-05 | ZNF222   |
| 1.24E-05 | CLSPN    |
| 1.26E-05 | SAPCD1   |
| 1.26E-05 | PIMREG   |
| 1.26E-05 | BARD1    |
| 1.38E-05 | KCNK3    |
| 1.42E-05 | JUN      |
| 1.42E-05 | CD274    |
| 1.44E-05 | MCM3     |
| 1.50E-05 | ASPM     |
| 1.56E-05 | NA       |
| 1.65E-05 | NA       |
| 1.65E-05 | SLC6A13  |
| 1.71E-05 | MAD2L1   |
| 1.71E-05 | KIF20A   |
| 1.81E-05 | KIFC1    |
| 1.94E-05 | CCNF     |
| 1.97E-05 | ABHD4    |
| 1.97E-05 | NBR2     |
| 2.02E-05 | DTYMK    |
| 2.10E-05 | C21orf58 |
| 2.25E-05 | NEIL3    |
| 2.49E-05 | HKDC1    |
| 2.61E-05 | ARRDC3   |
| 2.74E-05 | PLK1     |
| 2.87E-05 | NA       |
| 2.87E-05 | CMYA5    |

|          |          |
|----------|----------|
| 2.87E-05 | CCNA2    |
| 2.93E-05 | ZNF674   |
| 2.97E-05 | ADAMTS16 |
| 3.07E-05 | HJURP    |
| 3.30E-05 | VRK1     |
| 3.30E-05 | BUB1     |
| 3.35E-05 | ADPRM    |
| 3.55E-05 | KIF23    |
| 3.69E-05 | ERN1     |
| 3.69E-05 | ZWINT    |
| 3.70E-05 | UNG      |
| 3.70E-05 | MCM5     |
| 3.70E-05 | DDX11    |
| 3.70E-05 | UBE2C    |
| 3.78E-05 | TELO2    |
| 3.91E-05 | DNMT1    |
| 4.20E-05 | TK1      |
| 4.23E-05 | KIF2C    |
| 4.40E-05 | RND1     |
| 4.49E-05 | SEC24D   |
| 4.92E-05 | FTL      |
| 5.05E-05 | ARHGEF39 |
| 5.08E-05 | RPSAP44  |
| 5.21E-05 | TUBB     |
| 5.28E-05 | FOXM1    |
| 5.52E-05 | IL1A     |
| 5.52E-05 | NA       |
| 5.54E-05 | GRAMD1B  |
| 6.00E-05 | DYNC2I2  |
| 6.46E-05 | MIR22HG  |
| 6.56E-05 | ITPKC    |
| 7.33E-05 | CHTF18   |
| 7.55E-05 | POLA1    |
| 7.77E-05 | HEG1     |
| 8.07E-05 | RPS2P16  |
| 8.13E-05 | HTRA3    |
| 8.26E-05 | RDH12    |
| 8.26E-05 | DNAJB1   |
| 8.26E-05 | TTF2     |
| 8.26E-05 | CENPU    |
| 8.26E-05 | MAFF     |
| 8.31E-05 | RECQL4   |
| 8.38E-05 | POLD1    |
| 8.41E-05 | PRIM1    |
| 8.59E-05 | HSPA13   |
| 8.59E-05 | TTK      |
| 8.59E-05 | DEPDC1B  |

|             |           |
|-------------|-----------|
| 8.84E-05    | CCNB1     |
| 8.99E-05    | ZNF547    |
| 9.20E-05    | HSPA5     |
| 9.22E-05    | NRCAM     |
| 9.44E-05    | MMP13     |
| 9.65E-05    | LIG1      |
| 9.65E-05    | TMEM187   |
| 9.65E-05    | PPP1R15B  |
| 9.71E-05    | KRTAP2-3  |
| 9.95E-05    | NUF2      |
| 9.97E-05    | ECT2      |
| 0.000104293 | DHRS2     |
| 0.000109557 | TEDC2     |
| 0.000110802 | ASNS      |
| 0.000110802 | SYNPO2    |
| 0.000112854 | DDR2      |
| 0.000117667 | NDC80     |
| 0.000118345 | HIRIP3    |
| 0.000122164 | NA        |
| 0.000123873 | UBC       |
| 0.000128039 | EXO1      |
| 0.000137385 | FTH1      |
| 0.000141719 | MYB       |
| 0.000141719 | ZNF697    |
| 0.000141719 | TACC3     |
| 0.000141719 | CPEB3     |
| 0.000143216 | HMGA2-AS1 |
| 0.000143216 | KIF18A    |
| 0.00014417  | TIMP1     |
| 0.000144862 | TUFT1     |
| 0.000144862 | CDC25C    |
| 0.000146428 | C2        |
| 0.000147122 | SLC1A4    |
| 0.000148952 | NCAPG2    |
| 0.000150791 | LYSMD3    |
| 0.000157138 | HSPB8     |
| 0.000163046 | MYBL2     |
| 0.00016949  | ANLN      |
| 0.000172824 | CENPM     |
| 0.000177601 | VCAN      |
| 0.000182087 | JUNB      |
| 0.000182477 | LURAP1L   |
| 0.000186606 | MAB21L3   |
| 0.000194932 | TIMELESS  |
| 0.000194932 | GABARAPL1 |
| 0.000195388 | CCDC186   |
| 0.000201544 | YPEL5     |



|             |            |
|-------------|------------|
| 0.000206461 | NA         |
| 0.000210525 | KIF15      |
| 0.000211663 | ITPRIP     |
| 0.000212182 | GINS2      |
| 0.000213065 | PIF1       |
| 0.000215373 | IQGAP3     |
| 0.000215521 | SLFN5      |
| 0.000219355 | PCLAF      |
| 0.00022186  | WDR90      |
| 0.000222517 | PREPL      |
| 0.000232647 | FAM72A     |
| 0.000234043 | SEPHS2     |
| 0.000236761 | FAM72B     |
| 0.000236761 | FAM214A    |
| 0.000242762 | MPZL3      |
| 0.000242762 | RFC2       |
| 0.000242762 | CEP55      |
| 0.000242762 | NA         |
| 0.000242762 | ANKFN1     |
| 0.000242762 | CDCA5      |
| 0.000243019 | AURKA      |
| 0.000244697 | PTGER3     |
| 0.000249024 | RNASEH2A   |
| 0.000251179 | TDO2       |
| 0.000252603 | MELK       |
| 0.000257026 | PTHLH      |
| 0.000263874 | JAM3       |
| 0.000266316 | CAV1       |
| 0.000275077 | FANCI      |
| 0.000275194 | NIBAN1     |
| 0.000280613 | ZMYM5      |
| 0.000287371 | PRR11      |
| 0.00029179  | SKP2       |
| 0.000304641 | FAM72D     |
| 0.000306848 | PLEKHM3    |
| 0.00030833  | TROAP      |
| 0.000322262 | ZBED2      |
| 0.000325143 | BEST3      |
| 0.000325143 | HMGB1      |
| 0.000325143 | RANBP1     |
| 0.000325143 | KBTBD8     |
| 0.000335253 | RFC5       |
| 0.000337565 | LOC286059  |
| 0.000337565 | PDE4B      |
| 0.000338166 | ATP2A1-AS1 |
| 0.000343014 | RAD51      |
| 0.000344769 | CCNB2      |

|             |             |
|-------------|-------------|
| 0.000347143 | GMNN        |
| 0.000348235 | LVRN        |
| 0.000354881 | H19         |
| 0.000354881 | NCAPG       |
| 0.000357255 | SCFD2       |
| 0.000368715 | CYP4F11     |
| 0.000369366 | NMU         |
| 0.000374562 | VEGFD       |
| 0.000383246 | ATAD3A      |
| 0.000384465 | CKAP2L      |
| 0.00040352  | SLC6A12     |
| 0.000413552 | TBR1        |
| 0.000414879 | UBE2T       |
| 0.000415666 | CDKN2B      |
| 0.000426691 | LINC02273   |
| 0.000426691 | NA          |
| 0.000426691 | PTPRH       |
| 0.000426691 | NA          |
| 0.000430592 | ADAM17      |
| 0.000442938 | CREBRF      |
| 0.000453209 | LRIF1       |
| 0.000458649 | CTAGE8      |
| 0.000459412 | CREM        |
| 0.000467598 | CENPA       |
| 0.000480506 | NA          |
| 0.000491453 | RBL1        |
| 0.000500579 | ZNF654      |
| 0.000514886 | UBA6-AS1    |
| 0.000520559 | SCARA3      |
| 0.000523253 | NA          |
| 0.000525588 | PRC1        |
| 0.000530842 | FOS         |
| 0.000530842 | ZDHHC12     |
| 0.000531148 | GATD1       |
| 0.000533484 | NCAPD2      |
| 0.000552536 | RFC4        |
| 0.000552536 | C9orf24     |
| 0.000560384 | PRIMA1      |
| 0.000560384 | MSH2        |
| 0.000571326 | NLRP1       |
| 0.000574835 | LMNB2       |
| 0.000574835 | LTA         |
| 0.000574835 | NA          |
| 0.000574835 | TRBV20OR9-2 |
| 0.000576694 | ASF1B       |
| 0.000580132 | PFAS        |
| 0.000583007 | PARD6B      |

|             |              |
|-------------|--------------|
| 0.000599156 | SPAG5        |
| 0.000613788 | RCCD1        |
| 0.000613788 | NA           |
| 0.000613788 | DUSP10       |
| 0.000617682 | NEK2         |
| 0.00062868  | SPP1         |
| 0.000654977 | NA           |
| 0.000654977 | RACGAP1      |
| 0.000677966 | HMMR         |
| 0.000679696 | TXNL4B       |
| 0.000679696 | INCENP       |
| 0.000681052 | PCNA         |
| 0.000685907 | HMGB3        |
| 0.000685907 | NA           |
| 0.000686119 | NA           |
| 0.000710972 | NA           |
| 0.000711758 | HMGB2        |
| 0.000713292 | CLU          |
| 0.000775268 | GEMIN4       |
| 0.00078473  | ZNF189       |
| 0.00078473  | ADGRG1       |
| 0.000817929 | TMPO         |
| 0.000817929 | UFM1         |
| 0.000831894 | NASP         |
| 0.000908425 | FAM83D       |
| 0.000908425 | NA           |
| 0.000912799 | LOC101927354 |
| 0.000914729 | WNK3         |
| 0.000925211 | OSER1        |
| 0.00092646  | PSRC1        |
| 0.00092646  | NA           |
| 0.000935026 | GPR87        |
| 0.000936392 | PRDM1        |
| 0.000936392 | PGP          |
| 0.000943055 | APOL6        |
| 0.000943055 | STAT4        |
| 0.000943055 | CPEB4        |
| 0.000963277 | SRPX2        |
| 0.000963277 | MAPRE3       |
| 0.000986015 | DNAJC3       |
| 0.000996491 | GCC1         |
| 0.001002619 | CHAF1A       |
| 0.001022109 | YBX2         |
| 0.001061637 | RAD54L       |
| 0.001066182 | CDC20        |
| 0.001093789 | XBP1         |
| 0.001103707 | BRIP1        |

|             |              |
|-------------|--------------|
| 0.001103707 | SHMT1        |
| 0.001142575 | ZNF699       |
| 0.001198599 | NA           |
| 0.001198599 | CORO1A       |
| 0.001203894 | SDC1         |
| 0.001203894 | CHIC2        |
| 0.001203894 | TP73         |
| 0.001203894 | PRKDC        |
| 0.0012406   | RNASEL       |
| 0.001262697 | KIF11        |
| 0.001272043 | NA           |
| 0.001287204 | ARMC6        |
| 0.001288371 | SEL1L        |
| 0.001292618 | DMGDH        |
| 0.00129729  | NSD2         |
| 0.001304706 | MIDN         |
| 0.001304706 | FAM111B      |
| 0.001311498 | LINC02889    |
| 0.001313958 | CASS4        |
| 0.001373519 | FAM122B      |
| 0.001404432 | RPS2P14      |
| 0.001404432 | ETFDH        |
| 0.001409993 | CLN6         |
| 0.001424825 | ADM          |
| 0.001439371 | FRMD5        |
| 0.001444754 | NTHL1        |
| 0.001462864 | DNAJB2       |
| 0.001489663 | SH2D5        |
| 0.001492967 | LOC101927040 |
| 0.001514264 | CDC7         |
| 0.001527482 | FAM53C       |
| 0.001533076 | POLR1G       |
| 0.001560084 | SYNE1        |
| 0.001572372 | NA           |
| 0.001646964 | GIN51        |
| 0.001646964 | CDCA2        |
| 0.001660932 | SEMA4A       |
| 0.001675962 | SELENOK      |
| 0.00168264  | NA           |
| 0.0016927   | CTSD         |
| 0.001700057 | HMGB1P5      |
| 0.00171452  | RAD54B       |
| 0.001722703 | SAPCD2       |
| 0.001738857 | RB1CC1       |
| 0.001785192 | SRM          |
| 0.001785192 | ARHGAP11A    |
| 0.001832076 | MIR924HG     |

|             |              |
|-------------|--------------|
| 0.001832076 | C11orf94     |
| 0.001832076 | TMF1         |
| 0.001834633 | POLR3K       |
| 0.001845493 | TF           |
| 0.001845493 | TERT         |
| 0.001845493 | NA           |
| 0.001857958 | TICRR        |
| 0.001880171 | DHODH        |
| 0.001887912 | NUSAP1       |
| 0.001925346 | GOT1         |
| 0.00193002  | GPAT2        |
| 0.001950242 | LNCAROD      |
| 0.001953845 | NA           |
| 0.001953845 | NA           |
| 0.001963625 | ZFAND3       |
| 0.001971062 | KIZ          |
| 0.001980702 | MFSD13A      |
| 0.001980702 | E2F7         |
| 0.001980702 | GBP3         |
| 0.002001074 | EXOSC2       |
| 0.002001074 | H2BC15       |
| 0.002013335 | SGO2         |
| 0.002042148 | C16orf72     |
| 0.002049132 | SLC19A1      |
| 0.002113376 | SQLC         |
| 0.002113376 | MYOM1        |
| 0.002124457 | C7orf61      |
| 0.002140968 | FOXRED2      |
| 0.002169812 | LINC01504    |
| 0.002193632 | CHD2         |
| 0.002202018 | DLGAP2       |
| 0.002204466 | UPP1         |
| 0.00220966  | MND1         |
| 0.002236533 | MBD6         |
| 0.002236533 | ARL14        |
| 0.002268779 | NUP93        |
| 0.002268779 | NRGN         |
| 0.002268779 | DEPDC1       |
| 0.002274336 | FAM214B      |
| 0.00231825  | ZNF235       |
| 0.00231825  | DENND2C      |
| 0.002352496 | LOC101928994 |
| 0.002354092 | LINC00662    |
| 0.002354092 | GPR158       |
| 0.002354092 | RFTN2        |
| 0.002354092 | ARHGAP31     |
| 0.002363713 | STARD8       |

|             |              |
|-------------|--------------|
| 0.002374981 | GNB3         |
| 0.002387366 | KRT16        |
| 0.002387366 | ZNF160       |
| 0.002418141 | DSN1         |
| 0.002418141 | LCN2         |
| 0.00242639  | C9orf131     |
| 0.002445007 | CDCA8        |
| 0.002514939 | AZI2         |
| 0.002514939 | GFPT1        |
| 0.002522767 | AANAT        |
| 0.002537715 | RPL3L        |
| 0.002552702 | F2RL2        |
| 0.002574669 | TFE3         |
| 0.002602309 | ATG9B        |
| 0.002602309 | IFT20        |
| 0.002602309 | KIAA1217     |
| 0.002606876 | MTHFD1       |
| 0.002615993 | LOC102546294 |
| 0.002673942 | ME1          |
| 0.002682776 | IL31RA       |
| 0.002682776 | PNPLA8       |
| 0.002688329 | DUT          |
| 0.002689014 | NIT1         |
| 0.002711819 | USP17L7      |
| 0.002737419 | CCPG1        |
| 0.002737419 | DMBX1        |
| 0.002762805 | CTPS1        |
| 0.002762805 | GEMIN5       |
| 0.002794279 | TSC22D3      |
| 0.0028072   | NHLH1        |
| 0.0028072   | CEP152       |
| 0.00286061  | CDKN2AIP     |
| 0.002876271 | WDR45        |
| 0.002876271 | CLUH         |
| 0.002876271 | GIPC2        |
| 0.002876271 | TNFRSF10D    |
| 0.002876271 | PTTG1        |
| 0.002915464 | KNTC1        |
| 0.002977352 | NA           |
| 0.0029945   | BAG3         |
| 0.0029945   | PKD1L1       |
| 0.0029945   | TBCD         |
| 0.002995043 | CYB5R1       |
| 0.003001493 | PEAR1        |
| 0.003013674 | TRAIP        |
| 0.003028106 | PIDD1        |
| 0.003037313 | ZFYVE1       |

|             |           |
|-------------|-----------|
| 0.003047369 | POLD2     |
| 0.003047369 | EME1      |
| 0.003047369 | CA13      |
| 0.003047369 | FANCE     |
| 0.003050084 | NA        |
| 0.003089964 | RTN4RL1   |
| 0.003131181 | CHMP4C    |
| 0.003144394 | GLI2      |
| 0.003149734 | SLC22A15  |
| 0.003180373 | PLEKHJ1   |
| 0.003180373 | FUT3      |
| 0.00320493  | NAA80     |
| 0.00320493  | ANO1      |
| 0.00320493  | ATRIP     |
| 0.003214235 | TENT5C    |
| 0.003224437 | NAT8L     |
| 0.003224437 | HCLS1     |
| 0.00328867  | LARGE2    |
| 0.003353448 | NA        |
| 0.003364799 | LINC02616 |
| 0.003364799 | DNAAF5    |
| 0.003375307 | HEY1      |
| 0.003398307 | CHPF2     |
| 0.003511367 | CKAP2     |
| 0.003522881 | F2        |
| 0.003522881 | PAICS     |
| 0.003534636 | DUSP1     |
| 0.003534636 | CXCL8     |
| 0.003534636 | FAM219A   |
| 0.003552075 | CDKN3     |
| 0.003554567 | RPS7P3    |
| 0.0036142   | DCTPP1    |
| 0.0036142   | TFDP1     |
| 0.003614481 | CBX2      |
| 0.003657466 | ABCB10    |
| 0.003658193 | NA        |
| 0.00367013  | CYLD      |
| 0.003687538 | CDT1      |
| 0.003731731 | LGALS8    |
| 0.003740828 | NA        |
| 0.003750782 | RPL13P8   |
| 0.003761094 | KLK1      |
| 0.003797958 | RUSC1-AS1 |
| 0.003807393 | SPATA33   |
| 0.003807935 | WEE1      |
| 0.003827364 | NRM       |
| 0.003836908 | MIR31HG   |

|             |              |
|-------------|--------------|
| 0.003836908 | CHD5         |
| 0.003839522 | ZSWIM6       |
| 0.003844088 | MAFG         |
| 0.003884411 | NA           |
| 0.00390564  | NA           |
| 0.003914536 | ABCB1        |
| 0.003914536 | CD320        |
| 0.003936402 | ZNF468       |
| 0.003961899 | NA           |
| 0.003961899 | TCOF1        |
| 0.004003762 | HIF1A-AS3    |
| 0.004007738 | NA           |
| 0.004007738 | POLQ         |
| 0.004035213 | LAMP3        |
| 0.00406888  | FAM83G       |
| 0.00406888  | NA           |
| 0.004085747 | TPX2         |
| 0.004120936 | ALOX12P2     |
| 0.004120936 | SLFNL1       |
| 0.004120936 | FANCD2       |
| 0.004130289 | ALPK1        |
| 0.004146231 | NA           |
| 0.004146231 | FASN         |
| 0.004180375 | PRMT7        |
| 0.00419188  | RLF          |
| 0.004197564 | TRAPPC6B     |
| 0.004200672 | ZFP37        |
| 0.004206498 | CCN2         |
| 0.004206498 | SLC46A3      |
| 0.004215417 | KIF4A        |
| 0.004224087 | RMI2         |
| 0.004274703 | LOC100288637 |
| 0.004292524 | RBAK         |
| 0.004305708 | NCL          |
| 0.004315893 | REM2         |
| 0.004357919 | ZNF441       |
| 0.004357919 | NOC4L        |
| 0.004367079 | BTN2A1       |
| 0.004423527 | RPS6KA4      |
| 0.004471978 | ABCG5        |
| 0.004471978 | CDO1         |
| 0.004514323 | PELI1        |
| 0.004545988 | APOLD1       |
| 0.004663846 | ACAT2        |
| 0.004687686 | ANAPC1P4     |
| 0.004736612 | JAG2         |
| 0.004829063 | DARS2        |



|             |           |
|-------------|-----------|
| 0.004829063 | FOXRED1   |
| 0.004855357 | TUBG1     |
| 0.004876969 | ALS2      |
| 0.004901941 | ULBP1     |
| 0.004901941 | MRNIP     |
| 0.004905355 | LRRC20    |
| 0.004929224 | GOSR2     |
| 0.004929224 | EEF2KMT   |
| 0.004946948 | KIAA0513  |
| 0.004967428 | HAUS5     |
| 0.004973548 | RRS1      |
| 0.004983242 | GABRR2    |
| 0.005034763 | NFKBIL1   |
| 0.0050727   | THOP1     |
| 0.00511575  | TMEM41B   |
| 0.005163462 | SLC5A11   |
| 0.005170029 | DAPP1     |
| 0.005171542 | IRF7      |
| 0.005233306 | NA        |
| 0.005233446 | POC1A     |
| 0.005265563 | GAL       |
| 0.005284929 | LOC652276 |
| 0.005284929 | ACLY      |
| 0.005284929 | NA        |
| 0.005284929 | ZNF548    |
| 0.005284929 | NA        |
| 0.005342576 | ELFN1-AS1 |
| 0.005374388 | NDC1      |
| 0.005376956 | CAD       |
| 0.005385202 | RUVBL1    |
| 0.005385202 | ZNF44     |
| 0.005385202 | GCNT3     |
| 0.005400465 | UAP1L1    |
| 0.005424287 | BUD31     |
| 0.005442531 | NA        |
| 0.005533687 | GINS4     |
| 0.005551939 | CDC20P1   |
| 0.005556318 | NA        |
| 0.005585071 | DEDD2     |
| 0.005585071 | PRECSIT   |
| 0.005632081 | ZNF473    |
| 0.005691265 | ZFP36     |
| 0.005741346 | KDM6B     |
| 0.005742792 | MAP1A     |
| 0.005748701 | KIF20B    |
| 0.005786592 | MMS22L    |
| 0.005786592 | ZFAS1     |

|             |             |
|-------------|-------------|
| 0.005786592 | PLEKHM1     |
| 0.005786592 | CALCOCO2    |
| 0.005812354 | PIGH        |
| 0.00582648  | PLK4        |
| 0.005859593 | GOLGB1      |
| 0.005867147 | RTKN2       |
| 0.005868852 | TMEM167B    |
| 0.005868852 | STC2        |
| 0.00588645  | ABCB4       |
| 0.005920416 | KRBOX4      |
| 0.005977497 | ZNF791      |
| 0.006001133 | CAB39L      |
| 0.006091076 | NNAT        |
| 0.006108357 | GLIS3       |
| 0.006184073 | NA          |
| 0.006281452 | TMEM116     |
| 0.00633935  | CHEK2       |
| 0.006373275 | ZNF280A     |
| 0.006451552 | ZNF430      |
| 0.006559933 | KIF14       |
| 0.006559933 | NXF1        |
| 0.006656762 | TAF13       |
| 0.006656762 | SLC5A6      |
| 0.006656762 | RFPL3S      |
| 0.006698565 | ICMT        |
| 0.006717155 | AADAC       |
| 0.006819449 | TEX14       |
| 0.006844531 | TNFSF9      |
| 0.006847953 | BRF2        |
| 0.006862121 | FBF1        |
| 0.006883097 | TEDC1       |
| 0.006892443 | TSGA10      |
| 0.006906386 | TMEM40      |
| 0.006908907 | MAP3K6      |
| 0.006967186 | NUP35       |
| 0.006983478 | LURAP1L-AS1 |
| 0.007012915 | TSPY26P     |
| 0.007017236 | OCLN        |
| 0.007099947 | UCK2        |
| 0.007126438 | NCOA3       |
| 0.007173317 | SNX29       |
| 0.007242414 | PPIA        |
| 0.0072736   | SLC33A1     |
| 0.0072736   | CAVIN3      |
| 0.0072736   | NA          |
| 0.0072736   | FN3KRP      |
| 0.007282829 | MAGEB3      |

|             |              |
|-------------|--------------|
| 0.007331318 | SLC10A1      |
| 0.007343721 | SFXN2        |
| 0.00735072  | ABCA9        |
| 0.007495227 | TNFRSF13C    |
| 0.007495227 | SNORD14E     |
| 0.007495227 | POLE         |
| 0.007495227 | ZNF597       |
| 0.007498    | GPAT2P1      |
| 0.007575536 | TSC22D2      |
| 0.007605396 | MTARC1       |
| 0.007627742 | STX5         |
| 0.007627742 | RIBC2        |
| 0.007627742 | TLR10        |
| 0.007633965 | DPYSL5       |
| 0.007662075 | RN7SL472P    |
| 0.007662075 | PGF          |
| 0.007718482 | TUT7         |
| 0.007718482 | NA           |
| 0.007744921 | BDH1         |
| 0.007744921 | CREB3        |
| 0.007744921 | RFFL         |
| 0.007834198 | NSMCE4A      |
| 0.007853398 | DCPS         |
| 0.007878299 | NA           |
| 0.007887524 | INSIG1       |
| 0.007913727 | NA           |
| 0.007932106 | LOC440700    |
| 0.007932106 | CREB5        |
| 0.007992162 | PHTF1        |
| 0.00799454  | FRS2         |
| 0.008111492 | TRIML2       |
| 0.008120371 | USP13        |
| 0.008133336 | IFRD2        |
| 0.008133336 | ELL2         |
| 0.008133336 | UTP20        |
| 0.008168509 | HRH1         |
| 0.008193277 | ARMCX3       |
| 0.008254257 | PARP1        |
| 0.008260048 | INTS1        |
| 0.008260048 | GRK7         |
| 0.008268658 | ARHGEF26-AS1 |
| 0.008311281 | WNT10B       |
| 0.008311281 | PRKAB2       |
| 0.008320939 | UNC13D       |
| 0.008320939 | PAQR4        |
| 0.008360277 | MSH4         |
| 0.008360277 | PDSS1        |

|             |            |
|-------------|------------|
| 0.008360277 | MEIOSIN    |
| 0.008360277 | ZSCAN26    |
| 0.008409086 | ZNF484     |
| 0.008417434 | PRSS53     |
| 0.00841913  | MON1B      |
| 0.008453011 | IL20RB     |
| 0.008453011 | NA         |
| 0.008504703 | FBXL19-AS1 |
| 0.008541003 | BCL10      |
| 0.008541003 | DPH2       |
| 0.008541003 | KLHL28     |
| 0.008570028 | NA         |
| 0.008570028 | CCDC51     |
| 0.008570028 | S100P      |
| 0.008729164 | CTU2       |
| 0.008759736 | PLCL1      |
| 0.008759736 | TAGLN3     |
| 0.008781552 | ZFAND5     |
| 0.008785533 | DCK        |
| 0.008837525 | HNRNPD     |
| 0.008837525 | SUCNR1     |
| 0.008868512 | NA         |
| 0.008868512 | TBX3       |
| 0.008868512 | MPHOSPH9   |
| 0.008876648 | SLC3A2     |
| 0.008887716 | MOB3C      |
| 0.008893926 | FBXL6      |
| 0.008893926 | ZSCAN12    |
| 0.008893926 | YIPF5      |
| 0.008893926 | SLC41A2    |
| 0.008941249 | LRRC45     |
| 0.008972109 | GLA        |
| 0.0089836   | FBXO16     |
| 0.009072912 | ST8SIA2    |
| 0.009112629 | CCDC28A    |
| 0.009149657 | SLC10A7    |
| 0.009149657 | ERFE       |
| 0.009149657 | TBRG4      |
| 0.009149657 | NA         |
| 0.009154336 | SAC3D1     |
| 0.009172296 | LARP6      |
| 0.009172296 | SERINC1    |
| 0.009247351 | NA         |
| 0.009257882 | JHY        |
| 0.009311396 | RNF139-AS1 |
| 0.009350433 | NA         |
| 0.009350433 | SMC1A      |

|             |          |
|-------------|----------|
| 0.009452123 | NA       |
| 0.009489016 | GAS6     |
| 0.009506332 | DMRTA2   |
| 0.009541154 | TMEM177  |
| 0.00964417  | VEGFA    |
| 0.009709787 | TAX1BP1  |
| 0.009797628 | ACAD9    |
| 0.009811031 | KLF5     |
| 0.009811031 | TNS4     |
| 0.009811031 | NA       |
| 0.009811031 | B4GALT2  |
| 0.009811031 | ANKLE1   |
| 0.009823843 | ALDH16A1 |
| 0.009848397 | ZNF79    |
| 0.009853274 | GALR2    |
| 0.009877105 | TLR1     |
| 0.009877105 | TRAM1    |
| 0.009877105 | PTPRC    |
| 0.009894925 | CENPV    |
| 0.009914898 | LRFN4    |
| 0.009932707 | BDKRB1   |
| 0.009947848 | SOS2     |
| 0.010030428 | USP53    |
| 0.010074633 | EGFL7    |
| 0.010174361 | MRT04    |
| 0.010174361 | CTDSPL   |
| 0.010174361 | PARPBP   |
| 0.010312034 | NUDT1    |
| 0.010312034 | FABP5    |
| 0.010312034 | CFAP61   |
| 0.010376737 | MCF2     |
| 0.010432399 | DRP2     |
| 0.010498449 | GARS1    |
| 0.010572169 | ZFPM2    |
| 0.010629669 | TLR6     |
| 0.010734169 | NOL6     |
| 0.010823516 | RASD1    |
| 0.010860394 | ZBTB43   |
| 0.010996171 | P4HA2    |
| 0.011055601 | NIPAL3   |
| 0.011069544 | AOX1     |
| 0.011121485 | PKN3     |
| 0.011228167 | EFNA2    |
| 0.011228167 | PLEKHG4  |
| 0.011330203 | SCYL2    |
| 0.011467559 | GCSH     |
| 0.011489417 | BPIFC    |

|             |            |
|-------------|------------|
| 0.011489837 | PPP2R3B    |
| 0.011490092 | LSM4       |
| 0.011539297 | FDPS       |
| 0.011668072 | MAMDC4     |
| 0.011695134 | EIF5       |
| 0.011762332 | TRIM16     |
| 0.011906433 | NA         |
| 0.011978442 | NA         |
| 0.012003604 | NPM3       |
| 0.01200385  | SIGMAR1    |
| 0.012022375 | SERP1      |
| 0.012039152 | METTL1     |
| 0.012109851 | CSGALNACT2 |
| 0.012109851 | CCND1      |
| 0.012188186 | ATG4A      |
| 0.012209634 | ZNF266     |
| 0.012248892 | SLC29A1    |
| 0.012248892 | KNL1       |
| 0.012248892 | PXDC1      |
| 0.012248892 | MYLIP      |
| 0.012248892 | KIAA0319   |
| 0.012248892 | LINC01647  |
| 0.012248892 | ZNF701     |
| 0.012304716 | FAM83C     |
| 0.012317848 | WDR5       |
| 0.012327162 | ZEB1       |
| 0.012327162 | NDUFV1     |
| 0.01236143  | OGDH       |
| 0.012375185 | NA         |
| 0.012419064 | NA         |
| 0.012444101 | NA         |
| 0.0124813   | PLEKHO2    |
| 0.0124813   | ENOSF1     |
| 0.012631772 | ATAD2      |
| 0.012631772 | RNF166     |
| 0.012631772 | TFPI       |
| 0.012631772 | BCAN       |
| 0.012631772 | RABL6      |
| 0.012631772 | FBXO5      |
| 0.012633246 | IER2       |
| 0.012633246 | NA         |
| 0.012637909 | NA         |
| 0.012637909 | MRPS34     |
| 0.012637909 | COL12A1    |
| 0.012637909 | USP38      |
| 0.012638177 | NUCKS1     |
| 0.012663095 | FOXA1      |

|             |           |
|-------------|-----------|
| 0.012663095 | CYP2R1    |
| 0.012663095 | NA        |
| 0.012667996 | MYEOV     |
| 0.01277296  | BORA      |
| 0.012795785 | MIPEP     |
| 0.012804816 | SNX11     |
| 0.012865775 | SAMD8     |
| 0.012888245 | PUSL1     |
| 0.012908717 | TBRG1     |
| 0.012950241 | PLAG1     |
| 0.013140006 | CCDC62    |
| 0.013170085 | SLC25A25  |
| 0.013170085 | SHPK      |
| 0.013170085 | FAM216A   |
| 0.013170085 | KLHL15    |
| 0.013170085 | CCR3      |
| 0.013251854 | PRKG2     |
| 0.013262085 | GRM8      |
| 0.013280229 | SPTY2D1   |
| 0.013280229 | LDHB      |
| 0.013395313 | GPR75     |
| 0.013395313 | LOC646665 |
| 0.013416796 | ASB18     |
| 0.01346961  | CCDC34    |
| 0.01346961  | KRT8P12   |
| 0.013531517 | KLHL17    |
| 0.013531517 | NA        |
| 0.013564497 | EFCAB12   |
| 0.013577536 | RUSC1     |
| 0.013656158 | UBL3      |
| 0.013695635 | NA        |
| 0.013696152 | ABL2      |
| 0.013696152 | MRPL12    |
| 0.013883594 | NA        |
| 0.013907873 | NUP210    |
| 0.014004257 | TMEM231   |
| 0.014144039 | KCMF1     |
| 0.014208872 | SRPK3     |
| 0.014256037 | SLC17A8   |
| 0.014287083 | ZNF460    |
| 0.014333037 | ERO1B     |
| 0.014338191 | TIPIN     |
| 0.014338191 | NA        |
| 0.014389481 | NA        |
| 0.014434758 | ZNF277    |
| 0.014458786 | KCNQ10T1  |
| 0.014537239 | C6orf62   |

|             |           |
|-------------|-----------|
| 0.014541762 | CHRM5     |
| 0.014541762 | IFNWP19   |
| 0.01458855  | ZFYVE21   |
| 0.014605953 | LINC01534 |
| 0.014621042 | RAB5A     |
| 0.014647941 | NA        |
| 0.014668259 | NA        |
| 0.014668259 | CIR1      |
| 0.014673885 | HCG27     |
| 0.01467771  | ETV5      |
| 0.01467771  | VASN      |
| 0.014916614 | HSPA6     |
| 0.014953485 | PLAT      |
| 0.01507392  | NA        |
| 0.015325614 | TYRP1     |
| 0.015358881 | HOXB4     |
| 0.015358881 | SCRIB     |
| 0.015358881 | CDC45     |
| 0.015410931 | FAM8A1    |
| 0.015417922 | TBC1D23   |
| 0.015417922 | EMC3      |
| 0.015417922 | ZNF394    |
| 0.015456936 | MCMBP     |
| 0.015482973 | DDX51     |
| 0.015482973 | SCART1    |
| 0.015495057 | RRP1B     |
| 0.015495088 | TRAPPC2B  |
| 0.015649435 | TRPV3     |
| 0.015649435 | VWA5A     |
| 0.015649435 | NOP56     |
| 0.015658408 | NA        |
| 0.015696473 | FAM126B   |
| 0.015758154 | NA        |
| 0.015833235 | HADH      |
| 0.016051889 | MOAP1     |
| 0.016147137 | FHL2      |
| 0.016150241 | ATF4      |
| 0.016150241 | ZNF703    |
| 0.016175384 | MIR31     |
| 0.016175384 | DNAJC3-DT |
| 0.016199904 | C5orf47   |
| 0.016199904 | MIR103A2  |
| 0.016206732 | C1QBP     |
| 0.016206732 | RAMP1     |
| 0.016206732 | NA        |
| 0.016227596 | CIP2A     |
| 0.016227596 | PRDM2     |



|             |              |
|-------------|--------------|
| 0.016235443 | NA           |
| 0.01633627  | NAT16        |
| 0.01633627  | SGTB         |
| 0.016346839 | TM4SF18      |
| 0.016387425 | CLCN3        |
| 0.016548736 | HAPLN3       |
| 0.016548736 | THUMPD3-AS1  |
| 0.016549811 | ICOSLG       |
| 0.016579219 | FBXO30       |
| 0.016579219 | MGME1        |
| 0.016630691 | NA           |
| 0.016734712 | CTSV         |
| 0.0168033   | PDPK2P       |
| 0.016862144 | RND3         |
| 0.01686559  | MTX1P1       |
| 0.01686559  | NBR1         |
| 0.016936331 | CIDEC1       |
| 0.016971815 | LINC01963    |
| 0.01700662  | SNRPD1       |
| 0.01700662  | NCKAP5L      |
| 0.017085747 | QDPR         |
| 0.017091722 | BLVRB        |
| 0.017316975 | NA           |
| 0.017316975 | WDR76        |
| 0.017335597 | MYBL1        |
| 0.017403465 | SHCBP1       |
| 0.017406829 | GEN1         |
| 0.017463977 | NFE2L2       |
| 0.017501866 | ZNF383       |
| 0.017501866 | ZSCAN20      |
| 0.017501866 | SYNCRIP      |
| 0.017513754 | CENPJ        |
| 0.017538787 | NA           |
| 0.017585416 | PRPS2        |
| 0.01767579  | ITGA5        |
| 0.01769944  | ATAD3B       |
| 0.017711616 | NA           |
| 0.017729676 | SMAP1        |
| 0.017729676 | NA           |
| 0.017729676 | FAM151B      |
| 0.017767539 | ADAM11       |
| 0.01779231  | PCYOX1L      |
| 0.01779231  | TCEANC       |
| 0.017850454 | SLC6A9       |
| 0.017850454 | LTN1         |
| 0.017863817 | LOC101927533 |
| 0.017863817 | TNFSF13B     |

|             |              |
|-------------|--------------|
| 0.017903609 | SMG1P7       |
| 0.017903609 | SUV39H1      |
| 0.017903609 | PA2G4        |
| 0.017903609 | RRP1         |
| 0.017983526 | SLC25A30-AS1 |
| 0.01800312  | ANP32A       |
| 0.01802036  | ZNF192P1     |
| 0.01803552  | C21orf91     |
| 0.01805406  | HNRNPR       |
| 0.01805406  | PHF19        |
| 0.01805406  | SYNJ1        |
| 0.01805406  | IPO9         |
| 0.018076062 | PLD6         |
| 0.018191879 | NA           |
| 0.018191879 | FRK          |
| 0.018191879 | SLC25A39     |
| 0.018227394 | DYNC1I1      |
| 0.018301964 | URB2         |
| 0.018386788 | CNTRL        |
| 0.018393361 | GAMT         |
| 0.018422609 | TRIM47       |
| 0.018422609 | POLD3        |
| 0.018422609 | DIAPH3       |
| 0.018511894 | JAM2         |
| 0.018511894 | DNAH12       |
| 0.018511894 | NA           |
| 0.018511894 | SPDYA        |
| 0.018511894 | IRS2         |
| 0.018511894 | NA           |
| 0.018511894 | ZNF808       |
| 0.018548334 | HBP1         |
| 0.018736569 | RGMB-AS1     |
| 0.018827788 | NA           |
| 0.018951769 | COQ2         |
| 0.019081944 | STYK1        |
| 0.019092607 | NA           |
| 0.019111892 | PWP2         |
| 0.019139808 | PRODH        |
| 0.019139808 | CENPX        |
| 0.019171385 | CENPE        |
| 0.019297713 | YDJC         |
| 0.019302233 | NA           |
| 0.019304246 | BSN          |
| 0.019304246 | PTGES2       |
| 0.019466737 | TMEM160      |
| 0.019630116 | ALDH1B1      |
| 0.019640129 | AFF4         |

|             |              |
|-------------|--------------|
| 0.01964299  | CLK1         |
| 0.01964299  | RNF11        |
| 0.01964299  | NME1         |
| 0.01964299  | ZNF615       |
| 0.019658525 | PRTG         |
| 0.019658525 | TOX4         |
| 0.019691438 | BSDC1        |
| 0.019761819 | CCDC32       |
| 0.019832667 | RELB         |
| 0.019832667 | NOP14        |
| 0.019832667 | MAP7D2       |
| 0.019848065 | HTR6         |
| 0.019848065 | PSMD10P2     |
| 0.019860195 | TMEM39A      |
| 0.019979408 | TMEM87A      |
| 0.020030392 | ARL5B        |
| 0.020030392 | ADCY10       |
| 0.020086225 | WDR92        |
| 0.020129979 | NA           |
| 0.020144586 | RAD51AP1     |
| 0.020187808 | NQO2         |
| 0.020187808 | SLU7         |
| 0.020187808 | MORC3        |
| 0.020190997 | TREML3P      |
| 0.020190997 | LRP3         |
| 0.020212469 | NA           |
| 0.02021357  | MTBP         |
| 0.020333288 | CAV2         |
| 0.020613603 | PYCR3        |
| 0.020651138 | NA           |
| 0.020667574 | WDR18        |
| 0.020715694 | RAB30        |
| 0.020833933 | NA           |
| 0.020869506 | BANP         |
| 0.02095094  | MTERF3       |
| 0.021048924 | BRI3BP       |
| 0.021048924 | RHBDD3       |
| 0.021048924 | CKB          |
| 0.021076613 | NUDT15       |
| 0.021094151 | LOC284930    |
| 0.021106998 | CCDC126      |
| 0.021106998 | LOC101929709 |
| 0.021425313 | NA           |
| 0.021494214 | KCNE4        |
| 0.021530031 | SGO1         |
| 0.021558218 | IFT122       |
| 0.021615694 | GOLPH3L      |

|             |              |
|-------------|--------------|
| 0.021615694 | WARS1        |
| 0.021615694 | MAST4        |
| 0.021637622 | TMEM237      |
| 0.021637622 | TUBA1B       |
| 0.0216479   | POPDC3       |
| 0.021659118 | ERVMER34-1   |
| 0.021691495 | PPIH         |
| 0.021738303 | PSAP         |
| 0.021751136 | LSMEM1       |
| 0.021851816 | LOC100130714 |
| 0.021864809 | MSH5         |
| 0.021869472 | C1QL1        |
| 0.022102992 | ZBTB21       |
| 0.02211809  | PPP5C        |
| 0.0222851   | AAK1         |
| 0.022373798 | NA           |
| 0.022373798 | NA           |
| 0.022412945 | EIF1B        |
| 0.02242579  | TTBK2        |
| 0.02242579  | CSE1L        |
| 0.022458059 | MXD3         |
| 0.022489471 | MRPS26       |
| 0.022493365 | GNGT1        |
| 0.022592077 | ZNF408       |
| 0.022787182 | BBS12        |
| 0.022787182 | SMC2         |
| 0.022795795 | TMPO-AS1     |
| 0.022821587 | RFC3         |
| 0.022826997 | CEBPB        |
| 0.022828654 | NA           |
| 0.022857516 | SLC25A10     |
| 0.022857516 | RAN          |
| 0.022867921 | LOC102724064 |
| 0.022867921 | TIMM8A       |
| 0.022891703 | OIP5         |
| 0.022963361 | BLZF1        |
| 0.023101003 | TRIM46       |
| 0.023104939 | ZNF761       |
| 0.023104939 | DDX54        |
| 0.023109936 | KYAT1        |
| 0.023142865 | DIAPH2-AS1   |
| 0.023180351 | LINC00324    |
| 0.023342857 | NA           |
| 0.023371769 | CHEK1        |
| 0.023465988 | NA           |
| 0.023569339 | TSPAN8       |
| 0.023569339 | TTN          |

|             |              |
|-------------|--------------|
| 0.023569339 | SLC43A3      |
| 0.023569339 | RNF6         |
| 0.023569339 | CBR3         |
| 0.023569339 | RPL7AP16     |
| 0.023572226 | LOC100128007 |
| 0.023572226 | PRNP         |
| 0.023649138 | DIS3L2       |
| 0.023664767 | TESK1        |
| 0.0236683   | SMARCB1      |
| 0.0236683   | RRP9         |
| 0.023710016 | DUSP8        |
| 0.023729669 | LOC100133091 |
| 0.023729669 | OXCT1        |
| 0.023769525 | SLC25A11     |
| 0.023781879 | LOC400627    |
| 0.023903505 | CKMT1A       |
| 0.024038764 | ANGPT4       |
| 0.024044562 | GDF9         |
| 0.024044562 | NDUFB10      |
| 0.024115576 | LRRC66       |
| 0.024115576 | RNU1-1       |
| 0.024115576 | GTPBP2       |
| 0.024157297 | ZNF227       |
| 0.024157297 | NOCT         |
| 0.024420285 | SNRNP25      |
| 0.024420285 | NOP16        |
| 0.024420626 | NLE1         |
| 0.024511843 | CENPK        |
| 0.024550455 | MID2         |
| 0.024550455 | SIPA1L2      |
| 0.024550455 | FRRS1        |
| 0.024550455 | ABCB6        |
| 0.024550455 | INAFM2       |
| 0.024550455 | LHX2         |
| 0.024570017 | NA           |
| 0.024674623 | ARF4         |
| 0.024694527 | PTMAP5       |
| 0.024698179 | WHAMM        |
| 0.024698179 | NUBP2        |
| 0.024838119 | CYC1         |
| 0.02489405  | FAM135A      |
| 0.02489405  | NA           |
| 0.02489405  | QTRT1        |
| 0.024966955 | ZNF613       |
| 0.024966955 | PARP14       |
| 0.024966955 | HES6         |
| 0.024966955 | CCDC170      |

|             |           |
|-------------|-----------|
| 0.025036842 | NA        |
| 0.025055259 | KISS1R    |
| 0.025055259 | PTP4A3    |
| 0.025055259 | SLC39A10  |
| 0.025055259 | MGAM      |
| 0.025055259 | DKC1      |
| 0.025055259 | ZSWIM3    |
| 0.025060157 | HSD17B8   |
| 0.025186621 | CEP131    |
| 0.025215597 | MIS18A    |
| 0.025292532 | ATP6V0E2  |
| 0.025316205 | CKAP5     |
| 0.025316205 | C4orf46   |
| 0.02537717  | CCDC137   |
| 0.025410915 | DCAF4L1   |
| 0.02548843  | AMDHD2    |
| 0.025501642 | KCTD5     |
| 0.025538283 | AAAS      |
| 0.025603762 | CNOT4     |
| 0.02560694  | TNNC1     |
| 0.025643537 | PRR22     |
| 0.02575032  | STX2      |
| 0.025819176 | KLHL23    |
| 0.025832646 | PP2D1     |
| 0.02595302  | MACO1     |
| 0.026014126 | SETX      |
| 0.026035035 | NRARP     |
| 0.026359445 | NEK10     |
| 0.026381115 | NA        |
| 0.026381115 | NCOA7     |
| 0.026381115 | COA7      |
| 0.026381115 | PAXX      |
| 0.026381115 | ODF2      |
| 0.026381115 | GPRASP1   |
| 0.026644247 | MIR3682   |
| 0.026699923 | CHP1P2    |
| 0.026749761 | CCDC86    |
| 0.026752869 | ZNF778    |
| 0.02687114  | SMARCA4   |
| 0.02702544  | CNTLN     |
| 0.027099352 | ZNF329    |
| 0.027100173 | CASP2     |
| 0.027105619 | NA        |
| 0.027143409 | LINC00907 |
| 0.027171792 | ZSCAN31   |
| 0.02717747  | MTFR2     |
| 0.027255678 | NRBF2     |

|             |           |
|-------------|-----------|
| 0.027271533 | ABCD1     |
| 0.027271533 | TAF7      |
| 0.027393196 | NA        |
| 0.027393196 | SLC2A4RG  |
| 0.02744016  | INTS6     |
| 0.027464829 | OLAH      |
| 0.027464829 | ERP44     |
| 0.027549502 | CTDSP1    |
| 0.027551643 | NEU1      |
| 0.027563752 | NCS1      |
| 0.027580816 | H1-6      |
| 0.027580816 | THSD1     |
| 0.027580816 | TMEM19    |
| 0.027603921 | ETV3      |
| 0.027603921 | NME4      |
| 0.027613838 | KDM2A     |
| 0.027661167 | CLDN6     |
| 0.027773167 | CBX5      |
| 0.027816793 | RNF148    |
| 0.027901694 | SLC25A35  |
| 0.027936628 | MED24     |
| 0.028050604 | CD55      |
| 0.028106368 | FAM160B1  |
| 0.028206182 | KLHL21    |
| 0.028211454 | SPSB1     |
| 0.028276028 | TFR2      |
| 0.028315085 | LINC02367 |
| 0.028403027 | MRPL24    |
| 0.028475534 | TXNL1     |
| 0.02851461  | FBXL20    |
| 0.02851461  | SLC1A5    |
| 0.028590224 | SFXN5     |
| 0.0286525   | CD163     |
| 0.028822045 | ATG14     |
| 0.028829371 | DUSP26    |
| 0.028906262 | FAM189B   |
| 0.028906262 | TALDO1    |
| 0.028961524 | LAMTOR3   |
| 0.02910636  | CTXN1     |
| 0.02910636  | MTMR3     |
| 0.02910636  | VEZT      |
| 0.02910636  | AADACP1   |
| 0.029115029 | ANKAR     |
| 0.029139844 | PLPP5     |
| 0.029178678 | DNPH1     |
| 0.02923332  | JMJD8     |
| 0.029466932 | ZNF28     |

|             |           |
|-------------|-----------|
| 0.02955685  | CALM3     |
| 0.02955685  | FH        |
| 0.029600063 | NA        |
| 0.029600069 | CA3       |
| 0.029600069 | CHAF1B    |
| 0.029600069 | GGCT      |
| 0.029600069 | CERS1     |
| 0.029615503 | ARL2      |
| 0.029626134 | ZNF485    |
| 0.029626134 | LRRC8A    |
| 0.029626134 | ZADH2     |
| 0.029661154 | PSEN1     |
| 0.029661154 | EIF1      |
| 0.029683711 | HARBI1    |
| 0.029709372 | B4GALNT1  |
| 0.029737685 | OTUD1     |
| 0.029744894 | SLC25A15  |
| 0.029746564 | TMEM59    |
| 0.029776761 | NA        |
| 0.029905127 | ZNF800    |
| 0.029905127 | SVIL-AS1  |
| 0.029917229 | KCNN1     |
| 0.029933802 | TMEM200B  |
| 0.029990469 | KCNQ2     |
| 0.030155334 | RPIA      |
| 0.030191272 | C2orf78   |
| 0.030199373 | FAIM      |
| 0.030206026 | WNT3A     |
| 0.030206026 | RPARP-AS1 |
| 0.030206026 | NA        |
| 0.030238519 | CD22      |
| 0.030397523 | CRIP1     |
| 0.030445804 | TIPARP    |
| 0.030513592 | NA        |
| 0.030513592 | PITHD1    |
| 0.030513592 | IRAK2     |
| 0.030513592 | HAVCR2    |
| 0.030513592 | ESRP2     |
| 0.030625267 | PUM3      |
| 0.030633926 | RHOT2     |
| 0.030745472 | LSS       |
| 0.030752437 | WDR26     |
| 0.030777147 | LOC150051 |
| 0.030885786 | DDN       |
| 0.030885786 | RPS6KC1   |
| 0.030885786 | NA        |
| 0.030891761 | ATG101    |



|             |           |
|-------------|-----------|
| 0.030891761 | TMEM117   |
| 0.030982361 | PEX12     |
| 0.031067199 | ZNF271P   |
| 0.031067199 | HDHD5     |
| 0.031159754 | ACBD7     |
| 0.031231105 | SPACA6    |
| 0.031243661 | NA        |
| 0.031243661 | MOB2      |
| 0.031253636 | NA        |
| 0.031276258 | NA        |
| 0.031332141 | SLC30A7   |
| 0.031332141 | BEND3     |
| 0.031393378 | WNK2      |
| 0.031399653 | TSPYL2    |
| 0.031430202 | HGH1      |
| 0.031430202 | CD4       |
| 0.031450607 | COLGALT1  |
| 0.031478602 | HMGA2     |
| 0.031609353 | PELO      |
| 0.031668324 | SUPT6H    |
| 0.031668324 | NA        |
| 0.031668324 | NA        |
| 0.031698757 | ALPL      |
| 0.031698757 | FAM161B   |
| 0.031978356 | ZNF823    |
| 0.032034209 | TFAP4     |
| 0.032039443 | NA        |
| 0.032076834 | MAPK12    |
| 0.032112795 | FBXO42    |
| 0.032200785 | ZACN      |
| 0.032226264 | SUPT7L    |
| 0.032268864 | PLTP      |
| 0.032268864 | NFKBIZ    |
| 0.032604374 | SIVA1     |
| 0.032895126 | MSH6      |
| 0.032905669 | GRAMD2A   |
| 0.03291019  | ZNF490    |
| 0.032931716 | MBD5      |
| 0.032931716 | TEAD4     |
| 0.032931716 | SEC24A    |
| 0.032931716 | XRCC1     |
| 0.032931716 | LMF2      |
| 0.032955046 | AXL       |
| 0.033051264 | ATP10D    |
| 0.033051264 | NA        |
| 0.033051264 | LINC02405 |
| 0.033114012 | PYGM      |

|             |         |
|-------------|---------|
| 0.033258125 | TBC1D15 |
| 0.033261712 | NA      |
| 0.033379185 | FSCN3   |
| 0.033514449 | AFF3    |
| 0.033514449 | FAM241B |
| 0.033514449 | TSEN54  |
| 0.03351992  | SNX5    |
| 0.033564008 | SHROOM1 |
| 0.033565259 | CCDC160 |
| 0.033639202 | NFIA    |
| 0.033741727 | R3HCC1L |
| 0.033755821 | GUSBP1  |
| 0.033755821 | ZNF37A  |
| 0.033773173 | BMPR1B  |
| 0.033815218 | SSRP1   |
| 0.033981444 | TBPL1   |
| 0.034071613 | LRRC26  |
| 0.034134467 | ALKBH6  |
| 0.034247226 | RNF24   |
| 0.034377622 | ZNF622  |
| 0.034395586 | SFI1    |
| 0.034395586 | GPSM2   |
| 0.034395586 | ZNF274  |
| 0.034408336 | CC2D2A  |
| 0.034462778 | SLC51A  |
| 0.034462778 | FMO5    |
| 0.034546053 | CYB5RL  |
| 0.034706774 | DHRS4   |
| 0.034724814 | EXOC8   |
| 0.034816565 | NA      |
| 0.035055404 | NA      |
| 0.035055404 | STAC3   |
| 0.035182179 | NPR3    |
| 0.035596355 | SCLY    |
| 0.035596355 | MSRB1   |
| 0.035824232 | CDKN1A  |
| 0.035876323 | ZNF175  |
| 0.03600483  | STAT6   |
| 0.036057892 | HNRNPF  |
| 0.036057892 | STK25   |
| 0.036061131 | CSPG4   |
| 0.036061131 | ZNF721  |
| 0.036292935 | FLOT2   |
| 0.036332421 | NA      |
| 0.036332421 | ITGB3BP |
| 0.036332421 | POGLUT3 |
| 0.036459343 | RUSC2   |

|             |           |
|-------------|-----------|
| 0.03653427  | MED8      |
| 0.036559742 | TMEM121   |
| 0.036610441 | GLOD4     |
| 0.036610441 | IER5      |
| 0.036813411 | EGF       |
| 0.036851751 | PP7080    |
| 0.037063475 | COG3      |
| 0.037205067 | ARID3B    |
| 0.037205067 | FSCN1     |
| 0.037205067 | CREB3L3   |
| 0.037205067 | ZNF197    |
| 0.037205067 | RYBP      |
| 0.037205067 | RPS4XP17  |
| 0.037400295 | HES4      |
| 0.037537172 | D2HGDH    |
| 0.037572649 | UBE2B     |
| 0.037613555 | SEC14L1P1 |
| 0.037640097 | TSPAN31   |
| 0.037685884 | VAR51     |
| 0.037704702 | MID1      |
| 0.037704702 | NA        |
| 0.037711877 | TUFM      |
| 0.037728367 | TG        |
| 0.037728367 | FBXO8     |
| 0.037858541 | TEAD2     |
| 0.037885642 | NA        |
| 0.03799805  | ABCA10    |
| 0.038076718 | TRIM38    |
| 0.038076718 | WDR4      |
| 0.038076718 | SUMO3     |
| 0.038094835 | ULK3      |
| 0.038329239 | NCOR1     |
| 0.038329239 | HSCB      |
| 0.038329239 | OR6E1P    |
| 0.038442127 | JPH1      |
| 0.038442127 | CNTROB    |
| 0.038442127 | HSPH1     |
| 0.038442127 | SLC35G2   |
| 0.03847416  | POLR3G    |
| 0.038526371 | SLC10A5   |
| 0.038797832 | SNRPA     |
| 0.038797832 | GGT1      |
| 0.038797832 | SLC37A4   |
| 0.038903581 | PIGQ      |
| 0.038944955 | CASP10    |
| 0.038990481 | WDR12     |
| 0.038990481 | DUSP13    |

|             |           |
|-------------|-----------|
| 0.039102452 | TRIM5     |
| 0.039120389 | NAALAD2   |
| 0.039127336 | NR2C2AP   |
| 0.03920092  | CENPW     |
| 0.039292043 | NOS3      |
| 0.039498934 | GDAP2     |
| 0.039515798 | PMS2CL    |
| 0.039553157 | PRKRIP1   |
| 0.039674417 | NA        |
| 0.039726943 | SDF2      |
| 0.039960647 | SNIP1     |
| 0.039993534 | UTP4      |
| 0.039993534 | NA        |
| 0.040005543 | STX3      |
| 0.040074556 | ZNF14     |
| 0.040214313 | MIS18BP1  |
| 0.040482068 | POU2F2    |
| 0.040482068 | SLC3A1    |
| 0.040482812 | FARSB     |
| 0.040482812 | BACH2     |
| 0.04049049  | CPLX1     |
| 0.04049049  | ARHGEF5   |
| 0.04049049  | TNC       |
| 0.040613719 | NA        |
| 0.040725333 | SHOC1     |
| 0.040768504 | NA        |
| 0.040792778 | CEP78     |
| 0.040792778 | FLNC      |
| 0.040852769 | MARCHF1   |
| 0.040914596 | MPP4      |
| 0.040919549 | IMP3      |
| 0.041061987 | MFSD11    |
| 0.041092702 | EHMT2     |
| 0.041093131 | RNF19A    |
| 0.041150084 | NAGLU     |
| 0.041215554 | ENHO      |
| 0.041215554 | ZNF641    |
| 0.041215554 | ZNF512B   |
| 0.041215554 | CCSER2    |
| 0.041360193 | JMJD6     |
| 0.041360193 | RBM48     |
| 0.04137589  | DHX37     |
| 0.04137589  | ATP5MC1   |
| 0.04137589  | MIRLET7F1 |
| 0.04137589  | SUSD2     |
| 0.04137589  | TNKS      |
| 0.04137589  | FAM209A   |

|             |          |
|-------------|----------|
| 0.041520811 | NA       |
| 0.041539728 | NA       |
| 0.041673825 | ZNF557   |
| 0.041743714 | BMT2     |
| 0.041743714 | SLC66A1  |
| 0.041743714 | CLHC1    |
| 0.041786041 | PHB      |
| 0.041786041 | CEMIP2   |
| 0.041934182 | NA       |
| 0.042013899 | ZNF404   |
| 0.042057329 | TET2     |
| 0.042261256 | NUP37    |
| 0.042318824 | HOXA1    |
| 0.042435925 | TLCD1    |
| 0.04254798  | CARMIL2  |
| 0.042569385 | ZNF621   |
| 0.042668241 | TXNRD1   |
| 0.042668241 | NA       |
| 0.042701293 | NA       |
| 0.042926934 | NA       |
| 0.042926934 | CCNE2    |
| 0.042926934 | PM20D2   |
| 0.042926934 | ABCA5    |
| 0.042926934 | OR2A20P  |
| 0.042926934 | SDR42E1  |
| 0.042926934 | P3H3     |
| 0.042926934 | PODNL1   |
| 0.043029634 | CSTA     |
| 0.043029634 | FIBP     |
| 0.043029634 | ZKSCAN8  |
| 0.043119215 | SERINC3  |
| 0.043144274 | AGRN     |
| 0.043175949 | BLOC1S2  |
| 0.043353284 | DNAJA4   |
| 0.043561755 | ABHD12B  |
| 0.043585393 | NR2F2    |
| 0.043585393 | NA       |
| 0.043701972 | KDM4A    |
| 0.043878636 | PUS3     |
| 0.044205912 | VPS37B   |
| 0.044266751 | ZNF585B  |
| 0.04427362  | RPS17P3  |
| 0.044337645 | PPAT     |
| 0.044411965 | PACSIN3  |
| 0.044423443 | MARVELD1 |
| 0.044423443 | CDK2     |
| 0.044423443 | CFAP77   |

|             |              |
|-------------|--------------|
| 0.044423443 | MTR          |
| 0.044460492 | HLA-E        |
| 0.044460492 | IMP4         |
| 0.0444754   | ZBED3-AS1    |
| 0.044639436 | E2F6         |
| 0.044704975 | RNASEH2B     |
| 0.044734607 | NF1          |
| 0.044751729 | TCAM1P       |
| 0.044780975 | PHF1         |
| 0.044780975 | PRMT6        |
| 0.044780975 | MUC1         |
| 0.044780975 | ARHGAP4      |
| 0.044780975 | TDH          |
| 0.044849558 | IPO5         |
| 0.044945648 | ZNF546       |
| 0.044945648 | OPLAH        |
| 0.044964754 | LINC-PINT    |
| 0.044964754 | TFG          |
| 0.044975134 | C20orf27     |
| 0.045021012 | ZBTB49       |
| 0.045021012 | MRGPRF       |
| 0.045021012 | CAMKK2       |
| 0.045183673 | REL          |
| 0.045213753 | EMP2         |
| 0.045213753 | UBN2         |
| 0.045213753 | NA           |
| 0.045213753 | LOC100422627 |
| 0.045213753 | RNF10        |
| 0.045231418 | NA           |
| 0.045231418 | NUDT8        |
| 0.045420381 | LATS2        |
| 0.045423394 | SH3TC1       |
| 0.045423394 | PDHA1        |
| 0.045436914 | ENTPD7       |
| 0.045641291 | MECR         |
| 0.045641291 | ADSL         |
| 0.045723146 | RNASE1       |
| 0.045723146 | RPL22L1      |
| 0.045816667 | CEBPG        |
| 0.045816667 | DUS1L        |
| 0.045824814 | PTMA         |
| 0.045846248 | LAMA3        |
| 0.045846248 | GPATCH3      |
| 0.045846248 | ATP6V1B1-AS1 |
| 0.045846248 | INO80D       |
| 0.045846248 | LINC02608    |
| 0.045846248 | ZNF567       |

|             |              |
|-------------|--------------|
| 0.046057791 | NA           |
| 0.046070504 | TCAP         |
| 0.046186518 | CPNE7        |
| 0.046243474 | UGDH         |
| 0.046252824 | LAT2         |
| 0.046252824 | KCNS1        |
| 0.046252824 | NA           |
| 0.046381697 | PI4K2B       |
| 0.046423236 | UTP15        |
| 0.046430092 | RTN4R        |
| 0.046573462 | NECAB2       |
| 0.046573462 | ZSCAN5A      |
| 0.046573462 | HELB         |
| 0.046573462 | NXPE3        |
| 0.046574657 | H2BC12       |
| 0.046591393 | AKT1         |
| 0.046656111 | ZNF286B      |
| 0.046669889 | CFAP70       |
| 0.04678514  | THBS1        |
| 0.04679667  | PKMP3        |
| 0.04679667  | FAM71F2      |
| 0.046884261 | MAPK15       |
| 0.046910942 | PTH1R        |
| 0.047003174 | RNF103       |
| 0.047078616 | MILR1        |
| 0.047078616 | GNB4         |
| 0.047083988 | INO80B       |
| 0.047083988 | TRAP1        |
| 0.047124576 | BEND7        |
| 0.047131017 | NA           |
| 0.047159234 | RNF185       |
| 0.047196151 | TBC1D13      |
| 0.047227069 | CYP19A1      |
| 0.047258306 | LOC107986114 |
| 0.047258306 | NA           |
| 0.047258306 | NA           |
| 0.047333057 | NA           |
| 0.047338709 | ANKRD13B     |
| 0.047413257 | DLAT         |
| 0.047413257 | DSG4         |
| 0.047413257 | MDN1         |
| 0.047413257 | AP1G1        |
| 0.047413257 | OFD1         |
| 0.047433007 | UBAC1        |
| 0.047505748 | ARL9         |
| 0.047505748 | PNPLA3       |
| 0.047515226 | GAS2L1       |

|             |           |
|-------------|-----------|
| 0.047536545 | NA        |
| 0.047624335 | GCSIR     |
| 0.047731885 | GPATCH2L  |
| 0.047774607 | PALB2     |
| 0.047841732 | ATIC      |
| 0.047991744 | GPAT3     |
| 0.048057024 | KDM1A     |
| 0.048100132 | APEH      |
| 0.048100132 | NDRG1     |
| 0.048168884 | NA        |
| 0.048168884 | NA        |
| 0.048239747 | RIPOR1    |
| 0.048255246 | EML3      |
| 0.048453882 | SETMAR    |
| 0.048490134 | GPAA1     |
| 0.048594634 | EPC1      |
| 0.048594634 | SLC29A2   |
| 0.048594634 | BRICD5    |
| 0.048594634 | GSDMD     |
| 0.048594634 | HMBS      |
| 0.048628208 | MACROH2A2 |
| 0.048670766 | NA        |
| 0.048717156 | NA        |
| 0.048746941 | POLA2     |
| 0.048779204 | FER1L6    |
| 0.04877993  | GCNT4     |
| 0.048831594 | NA        |
| 0.049124178 | HSPA8     |
| 0.049160394 | BOD1L1    |
| 0.049167403 | MYBBP1A   |
| 0.049167403 | NA        |
| 0.049241527 | SHOC2     |
| 0.04934947  | NUP188    |
| 0.04934947  | CEP192    |
| 0.049357986 | DCUN1D3   |
| 0.049357986 | AFTPH     |
| 0.049391529 | ZSCAN25   |
| 0.049391529 | TTLL12    |
| 0.049427893 | PROZ      |
| 0.049427893 | FAM183BP  |
| 0.049442687 | HECW1     |
| 0.049538621 | NA        |
| 0.049538621 | EAF1      |
| 0.049576594 | ZWILCH    |
| 0.049669759 | AIMP2     |
| 0.049837203 | NA        |
| 0.049837203 | TMEM147   |



|             |          |
|-------------|----------|
| 0.049837203 | YIPF1    |
| 0.04985343  | EGR3     |
| 0.049891553 | TUBB8P2  |
| 0.049891553 | SPATA2   |
| 0.049891553 | DCLRE1B  |
| 0.049891553 | INSC     |
| 0.049891553 | DIRAS3   |
| 0.049905455 | HUS1B    |
| 0.049979672 | DENND4A  |
| 0.050041012 | KCTD20   |
| 0.050041012 | C2orf42  |
| 0.050041012 | NA       |
| 0.050099941 | NA       |
| 0.050120255 | ARHGEF2  |
| 0.050124207 | SDHA     |
| 0.050332353 | ELAPOR1  |
| 0.050368312 | NA       |
| 0.050368312 | FICD     |
| 0.050368312 | NA       |
| 0.050474289 | MRPL23   |
| 0.050635191 | NA       |
| 0.050635191 | PPM1G    |
| 0.050662183 | RAD51C   |
| 0.05080537  | NA       |
| 0.050850703 | ZNF234   |
| 0.050936003 | KCNH3    |
| 0.051034514 | FKBP5    |
| 0.051080038 | CFD      |
| 0.051386856 | RPL12P24 |
| 0.051479387 | MAP3K14  |
| 0.051479387 | ACTN4    |
| 0.051484587 | KDM5B    |
| 0.051484587 | ADSS2    |
| 0.051484587 | POLR1B   |
| 0.05165484  | CHMP5    |
| 0.051740392 | TRAPPC2L |
| 0.051886401 | NA       |
| 0.051886401 | KANK2    |
| 0.051895641 | PRXL2B   |
| 0.051905078 | LGR5     |
| 0.051905078 | ST7      |
| 0.052044517 | N4BP2L1  |
| 0.052063174 | TSPAN19  |
| 0.05208205  | NA       |
| 0.052115315 | ZC3H12A  |
| 0.052115315 | BRD2     |
| 0.052148631 | TSLP     |

|             |           |
|-------------|-----------|
| 0.052185041 | FBRSL1    |
| 0.052207184 | QPCTL     |
| 0.052388693 | CSNK1G1   |
| 0.052455259 | STK32C    |
| 0.052478203 | NA        |
| 0.052619525 | HECA      |
| 0.05261999  | LRP10     |
| 0.052674661 | CTC1      |
| 0.052694411 | NA        |
| 0.052958616 | SLC25A1   |
| 0.053093192 | ADCK5     |
| 0.053109917 | LMO4      |
| 0.053118759 | PGAP3     |
| 0.053180142 | ADCY3     |
| 0.053298781 | POLRMT    |
| 0.053301248 | CAPN10-DT |
| 0.053325721 | NA        |
| 0.053337579 | KLHDC7B   |
| 0.053584282 | RGS4      |
| 0.053634547 | ING3      |
| 0.053634547 | ZIC2      |
| 0.053649343 | DCXR      |
| 0.05365313  | IL6R      |
| 0.053662581 | KDM6A     |
| 0.053662581 | TAB1      |
| 0.053753816 | B3GALT5   |
| 0.053753816 | ENC1      |
| 0.053888195 | IGSF1     |
| 0.053888195 | EPG5      |
| 0.053888195 | ENG       |
| 0.053954949 | CARS1     |
| 0.053997289 | NA        |
| 0.054032134 | HIPK3     |
| 0.05414869  | CAPN7     |
| 0.054184086 | KATNB1    |
| 0.054220963 | CCDC174   |
| 0.05437997  | WDR47     |
| 0.054472082 | PRMT1     |
| 0.054538412 | TSPAN4    |
| 0.054775762 | HM13      |
| 0.0548144   | SHLD3     |
| 0.054817315 | NA        |
| 0.054833431 | NA        |
| 0.055004973 | NA        |
| 0.055004973 | SEPTIN8   |
| 0.055004973 | PARVB     |
| 0.055154817 | MRPS12    |

|             |            |
|-------------|------------|
| 0.0552164   | ROCK1P1    |
| 0.0552164   | MED26      |
| 0.055267567 | LINC02280  |
| 0.055267567 | POU4F3     |
| 0.055267567 | NA         |
| 0.05546615  | BZW2       |
| 0.055522613 | SPDL1      |
| 0.055522613 | FBXL16     |
| 0.05557373  | PIWIL2     |
| 0.05557373  | ABI3       |
| 0.055605684 | PCYT2      |
| 0.055642337 | SRSF7      |
| 0.055665135 | SH3BP5L    |
| 0.055800955 | FJX1       |
| 0.055880108 | THCAT158   |
| 0.055880108 | NA         |
| 0.056389127 | SPPL2B     |
| 0.056389127 | PSME4      |
| 0.056389127 | BROX       |
| 0.05643165  | SDCBP2-AS1 |
| 0.056446858 | TMEM217    |
| 0.056503561 | TPMT       |
| 0.056589711 | ZSCAN30    |
| 0.056589711 | ABHD16B    |
| 0.056628284 | PRKG2-AS1  |
| 0.056628284 | EEF2K      |
| 0.056663352 | TPT1       |
| 0.056676423 | MED31      |
| 0.056676423 | NA         |
| 0.056707741 | ZNF669     |
| 0.056707741 | SLC25A40   |
| 0.056850198 | MCL1       |
| 0.056850198 | NA         |
| 0.057111283 | NA         |
| 0.057111283 | NLN        |
| 0.057111283 | URB1       |
| 0.057129029 | CABP7      |
| 0.057191817 | ZNF226     |
| 0.057191817 | DISP1      |
| 0.057191817 | ZNF143     |
| 0.057193295 | METTL8     |
| 0.057374643 | ZNF436     |
| 0.057523416 | SLC30A3    |
| 0.057540615 | BRCA2      |
| 0.057650067 | FAM120AOS  |
| 0.057685146 | NA         |
| 0.057685146 | CACNA1F    |

|             |          |
|-------------|----------|
| 0.057685146 | BCAS2    |
| 0.057771188 | NA       |
| 0.057803853 | NDEL1    |
| 0.057803853 | FGD3     |
| 0.058068413 | ARVCF    |
| 0.058068413 | UBQLNL   |
| 0.058077372 | PPM1B    |
| 0.058145574 | GZF1     |
| 0.058163078 | SERPINH1 |
| 0.058292491 | NA       |
| 0.058336159 | NA       |
| 0.058336159 | BCAT2    |
| 0.058336159 | ENTR1    |
| 0.058460048 | KMT2C    |
| 0.058636409 | TMEM203  |
| 0.058636409 | ITGAD    |
| 0.058810311 | TRARG1   |
| 0.059058451 | NUP85    |
| 0.059058451 | EAPP     |
| 0.059102989 | H3C13    |
| 0.059187825 | PPRC1    |
| 0.059333971 | LATS1    |
| 0.059333971 | FLYWCH1  |
| 0.059333971 | ATP6V1D  |
| 0.059418625 | OTUD5    |
| 0.059418625 | SSH2     |
| 0.059488923 | ANKDD1B  |
| 0.059509185 | H4C8     |
| 0.059510454 | KLHDC10  |
| 0.059536939 | GDF15    |
| 0.059584438 | RGS3     |
| 0.059729339 | ACAP3    |
| 0.059779346 | MFAP3    |
| 0.059791515 | CENPQ    |
| 0.059791515 | YPEL2    |
| 0.059796111 | DIS3L    |
| 0.059796111 | RAPGEF2  |
| 0.059841129 | NA       |
| 0.059881446 | ARHGEF33 |
| 0.060179323 | ZNF586   |
| 0.060260916 | NA       |
| 0.060315785 | QSOX2    |
| 0.060352265 | H2AZ2    |
| 0.060352265 | TMIE     |
| 0.060363761 | NA       |
| 0.060363761 | DCTN5    |
| 0.060380392 | NA       |

|             |          |
|-------------|----------|
| 0.060479296 | UQCC2    |
| 0.060572033 | RNF144B  |
| 0.060691853 | ASS1P12  |
| 0.060691853 | YY1AP1   |
| 0.060767939 | BCL2L1   |
| 0.060767939 | KIZ-AS1  |
| 0.060832515 | NA       |
| 0.060832515 | APLN     |
| 0.060977181 | CTH      |
| 0.061004191 | NKIRAS2  |
| 0.061004191 | IL10RA   |
| 0.061049106 | RRAD     |
| 0.061267756 | SAMD1    |
| 0.061288776 | SKIL     |
| 0.061288776 | FARSA    |
| 0.061288776 | PI4KB    |
| 0.061310743 | NOM1     |
| 0.061585108 | NA       |
| 0.061585108 | KCNE5    |
| 0.061843049 | NA       |
| 0.061843049 | PEBP1    |
| 0.061945255 | UTS2B    |
| 0.062365649 | ATG16L2  |
| 0.062365649 | NOC2L    |
| 0.062628024 | TSPAN9   |
| 0.062628024 | GASK1B   |
| 0.062628024 | NA       |
| 0.062714819 | ZNF350   |
| 0.062714819 | SLC4A8   |
| 0.062714819 | GARRE1   |
| 0.062714819 | IKZF5    |
| 0.062757678 | ZDHHC8   |
| 0.062772091 | HMBBOX1  |
| 0.062801017 | UBAP1    |
| 0.062992346 | WDR3     |
| 0.063033274 | SLC39A4  |
| 0.063033274 | DEK      |
| 0.063033274 | OSM      |
| 0.063121975 | DAG1     |
| 0.063132315 | FGFR3    |
| 0.063183214 | SMG1P3   |
| 0.063183214 | KLHL25   |
| 0.063183214 | PUS1     |
| 0.063359751 | PKP4     |
| 0.063375402 | PPARGC1B |
| 0.063446169 | PCSK9    |
| 0.063446169 | KIF24    |

|             |           |
|-------------|-----------|
| 0.063446169 | IQUB      |
| 0.063456909 | SMARCD2   |
| 0.06346533  | NA        |
| 0.063588197 | ZNF765    |
| 0.063588197 | LLGL1     |
| 0.063588197 | NA        |
| 0.063658904 | BACH1     |
| 0.063733141 | NA        |
| 0.063888066 | ATXN1L    |
| 0.063888066 | HGD       |
| 0.063888066 | GBA       |
| 0.063888066 | LTV1      |
| 0.063904279 | ANTKMT    |
| 0.063944559 | GCNA      |
| 0.06400638  | LINC01910 |
| 0.06400638  | CLEC11A   |
| 0.06400638  | NA        |
| 0.064346103 | AUNIP     |
| 0.064383915 | HSD17B3   |
| 0.064485252 | ZNF275    |
| 0.064520212 | LY6E      |
| 0.064676758 | IMPDH1    |
| 0.064736231 | DDX46     |
| 0.064835866 | SECISBP2L |
| 0.06492814  | NA        |
| 0.064948484 | RNF25     |
| 0.065064933 | KCNN4     |
| 0.065112437 | NAA30     |
| 0.065112437 | ZRSR2     |
| 0.065112437 | DCHS1     |
| 0.065141801 | THADA     |
| 0.065141801 | CARS2     |
| 0.065141801 | FTX       |
| 0.065151764 | HSD3B7    |
| 0.065151764 | DPP7      |
| 0.065161427 | ACAT1     |
| 0.065190011 | SRRM4     |
| 0.065219    | NA        |
| 0.065219    | KDM5A     |
| 0.065229442 | NBEAL2    |
| 0.065229442 | NHP2      |
| 0.065229442 | ITGAX     |
| 0.065229442 | TNFAIP8L1 |
| 0.065229442 | TRAF6     |
| 0.065261786 | GOLGA2P7  |
| 0.065288141 | GUCY1A2   |
| 0.065320095 | C19orf48  |

|             |          |
|-------------|----------|
| 0.065361137 | BICD1    |
| 0.065391832 | NA       |
| 0.065391832 | NME2     |
| 0.065463667 | DNAH11   |
| 0.065463667 | NA       |
| 0.065463667 | CHST14   |
| 0.065463667 | SLC27A3  |
| 0.065506098 | NA       |
| 0.065506098 | C18orf25 |
| 0.065699191 | ZSCAN10  |
| 0.065707868 | FBN3     |
| 0.065726    | NEDD4L   |
| 0.065726    | CLN8     |
| 0.065726    | PRKAB1   |
| 0.065809536 | XPOT     |
| 0.065875337 | RNF114   |
| 0.065875337 | ZBTB34   |
| 0.065875337 | SLC4A11  |
| 0.065875337 | HTR1B    |
| 0.065974625 | KCTD6    |
| 0.066219258 | ELFN1    |
| 0.066221752 | HCG25    |
| 0.066221752 | NA       |
| 0.066326255 | NA       |
| 0.066594287 | CGRRF1   |
| 0.066855077 | IFNA1    |
| 0.066876782 | NA       |
| 0.066931154 | SFXN4    |
| 0.067242863 | COPRS    |
| 0.067242863 | PRRT2    |
| 0.067242863 | HCN3     |
| 0.067327486 | RBBP8    |
| 0.067327486 | UFD1     |
| 0.067327486 | MYOM2    |
| 0.067327486 | ULK1     |
| 0.067357696 | SNORD63B |
| 0.067395351 | FAM20C   |
| 0.067395351 | COX6B2   |
| 0.067572096 | ADGRF3   |
| 0.067572096 | ZNF416   |
| 0.06760761  | MAP3K21  |
| 0.06760761  | SNHG7    |
| 0.067695931 | TES      |
| 0.067759977 | UBA7     |
| 0.067759977 | VIM      |
| 0.06802276  | TRIM39   |
| 0.068182878 | NA       |

|             |         |
|-------------|---------|
| 0.068203046 | TOMM5   |
| 0.068215812 | JMY     |
| 0.068240918 | LGMN    |
| 0.068331199 | HMGN3   |
| 0.068331199 | NA      |
| 0.068331199 | ZSCAN9  |
| 0.068331199 | PEA15   |
| 0.068463507 | HYAL2   |
| 0.068567682 | ZNF596  |
| 0.068633625 | COQ10B  |
| 0.068633625 | XRCC2   |
| 0.06863524  | HAGHL   |
| 0.06863524  | PLA2G4C |
| 0.068837962 | ACTL6A  |
| 0.068922644 | ABHD14B |
| 0.068922644 | NA      |
| 0.069082569 | TNPO1   |
| 0.069094946 | TUBGCP3 |
| 0.069177462 | NA      |
| 0.06923201  | ADM5    |
| 0.06923201  | MDM4    |
| 0.06923201  | TMEM79  |
| 0.06923201  | ZBTB10  |
| 0.06923201  | NA      |
| 0.069278294 | NUDCD1  |
| 0.069300653 | XYLB    |
| 0.069303373 | MIA2    |
| 0.069374408 | SCG5    |
| 0.069374408 | VPS54   |
| 0.069523818 | GOLGA3  |
| 0.069834513 | ARNTL2  |
| 0.069834513 | TMEM81  |
| 0.069893953 | USP16   |
| 0.069930368 | HPS6    |
| 0.069930368 | TIRAP   |
| 0.069930368 | NA      |
| 0.069930368 | NA      |
| 0.069930368 | EFCAB5  |
| 0.069930368 | MINCR   |
| 0.069976343 | ALG2    |
| 0.069976343 | NA      |
| 0.070174344 | NUDT3   |
| 0.070335281 | RTCA    |
| 0.070353848 | PCYT1A  |
| 0.070472489 | YWHAH   |
| 0.070472489 | NA      |
| 0.070503648 | MROH6   |



|             |            |
|-------------|------------|
| 0.070503648 | TNK1       |
| 0.070503648 | MIR27A     |
| 0.070655534 | TNFRSF8    |
| 0.070655534 | NA         |
| 0.070736663 | PNLDC1     |
| 0.070736663 | FOXO3B     |
| 0.070780862 | C1orf52    |
| 0.070834748 | SERTAD3    |
| 0.070834748 | UCP2       |
| 0.070834748 | CALCB      |
| 0.070834748 | NA         |
| 0.070845632 | NA         |
| 0.071027961 | ZNF440     |
| 0.071071299 | ARFGEF1    |
| 0.071077719 | GTPBP6     |
| 0.071077719 | NA         |
| 0.071077719 | TYW5       |
| 0.071107726 | FAM157A    |
| 0.071107726 | TMEM263    |
| 0.071135208 | C9orf40    |
| 0.071135208 | MBNL2      |
| 0.071135208 | MAP3K13    |
| 0.071195752 | GSTM3P1    |
| 0.071195752 | P3H4       |
| 0.071311637 | ZSCAN29    |
| 0.071395996 | MIR425     |
| 0.071546504 | HAUS1      |
| 0.071546504 | NA         |
| 0.071546504 | EIF2B3     |
| 0.071817411 | OXLD1      |
| 0.07209449  | NSL1       |
| 0.072126384 | PLEK       |
| 0.072242459 | ENAM       |
| 0.07228333  | DNAJC9-AS1 |
| 0.072352957 | APEX1      |
| 0.072352957 | NA         |
| 0.072352957 | FOXA3      |
| 0.072352957 | SGCG       |
| 0.072413079 | GPS1       |
| 0.072581755 | HOXB8      |
| 0.072916016 | TMSB15A    |
| 0.072916016 | SMC6       |
| 0.072933264 | TMEM201    |
| 0.07301563  | SLC7A7     |
| 0.073088755 | PLCB3      |
| 0.073088755 | LOC285638  |
| 0.073088755 | TMCO1      |

|             |              |
|-------------|--------------|
| 0.073088755 | IDH2         |
| 0.073088755 | NA           |
| 0.073188201 | DBN1         |
| 0.073207076 | ATP6V0A1     |
| 0.073207076 | ZNF221       |
| 0.073240524 | LOC101926913 |
| 0.073240524 | NA           |
| 0.07326907  | NXPH3        |
| 0.073364008 | TMED9        |
| 0.073385359 | RGMA         |
| 0.073385359 | GEMIN6       |
| 0.073385359 | THOC3        |
| 0.073418756 | PAPLN        |
| 0.073504252 | ARAP2        |
| 0.073534412 | PNPO         |
| 0.073606808 | MELTF-AS1    |
| 0.073606808 | ZKSCAN5      |
| 0.073606808 | BRAP         |
| 0.073895508 | STEAP1       |
| 0.073895508 | NA           |
| 0.073900179 | VMP1         |
| 0.073900179 | AADAT        |
| 0.074022704 | RNFT1        |
| 0.074039467 | RBFA         |
| 0.074083948 | ATP6V0A4     |
| 0.074257612 | DUSP9        |
| 0.07437596  | HS6ST2       |
| 0.074384974 | NA           |
| 0.074384974 | RN7SL75P     |
| 0.074397394 | PPP1R14B     |
| 0.074397394 | GSTCD        |
| 0.074397394 | NA           |
| 0.074441137 | TSSK6        |
| 0.07447029  | SLC26A6      |
| 0.07447029  | SMS          |
| 0.07447029  | ZGRF1        |
| 0.07447029  | MED10        |
| 0.07452478  | HELZ         |
| 0.07452478  | SNAI1        |
| 0.074556448 | H2BC20P      |
| 0.074865296 | ALG6         |
| 0.074877362 | NA           |
| 0.074909271 | HSPB6        |
| 0.074917247 | SAMD4B       |
| 0.074917247 | SEC61B       |
| 0.074917247 | TESMIN       |
| 0.074917247 | ARL6IP6      |

|             |              |
|-------------|--------------|
| 0.074917247 | TOM1         |
| 0.075128704 | LOC105369980 |
| 0.075128704 | MIR7-3HG     |
| 0.075128704 | DVL2         |
| 0.075325211 | CBX3         |
| 0.075445782 | ZNF598       |
| 0.075445782 | COL6A3       |
| 0.075489511 | LINC00862    |
| 0.075489511 | SLC35E4      |
| 0.075489511 | TRIM28       |
| 0.075489511 | H2BC5        |
| 0.075686709 | NA           |
| 0.075690276 | ASB13        |
| 0.075747269 | HMCN2        |
| 0.075748676 | SELPLG       |
| 0.075748676 | SDCBP        |
| 0.075835681 | ANKRD42      |
| 0.075835681 | ULK4         |
| 0.075835681 | LRFN1        |
| 0.075840376 | MAP4K2       |
| 0.075919458 | NA           |
| 0.075931094 | NT5C         |
| 0.075932122 | H2BC11       |
| 0.075932122 | MALL         |
| 0.075998961 | MFSD9        |
| 0.075998961 | ALG11        |
| 0.075998961 | FHOD1        |
| 0.076078151 | JOSD1        |
| 0.076078151 | NA           |
| 0.076078151 | NA           |
| 0.076353251 | HIC2         |
| 0.076353251 | SIGLEC10     |
| 0.076353251 | S100A3       |
| 0.076607274 | GSR          |
| 0.07667638  | SRD5A3       |
| 0.076705536 | PDRG1        |
| 0.076708578 | VPS9D1-AS1   |
| 0.076708578 | GPATCH2      |
| 0.076709456 | HDGF         |
| 0.076709456 | HASPIN       |
| 0.076762836 | NA           |
| 0.076762836 | ANKRD11      |
| 0.076799658 | ENDOG        |
| 0.076913292 | TJAP1        |
| 0.077066545 | PSMG1        |
| 0.07713303  | ASB8         |
| 0.077233179 | POFUT2       |

|             |          |
|-------------|----------|
| 0.077274207 | NA       |
| 0.077274207 | MFSD4A   |
| 0.077289072 | MOK      |
| 0.077289072 | NA       |
| 0.077289072 | APOBEC3C |
| 0.077466162 | SMPD1    |
| 0.077643972 | CDC25B   |
| 0.077643972 | UCP3     |
| 0.077701658 | NA       |
| 0.077785475 | RPUSD3   |
| 0.077785475 | MMS19    |
| 0.077951955 | B4GAT1   |
| 0.077951955 | NAT14    |
| 0.078017503 | RAD54L2  |
| 0.078131291 | DYRK1B   |
| 0.078474996 | SLC45A2  |
| 0.078634801 | SCUBE2   |
| 0.078634801 | TMEM127  |
| 0.078888544 | ELOVL3   |
| 0.078925911 | NA       |
| 0.078966222 | PAFAH1B3 |
| 0.078978719 | PMS1     |
| 0.078991025 | THAP1    |
| 0.079087754 | MANEAL   |
| 0.079153769 | ZNF35    |
| 0.079406928 | SLC35D2  |
| 0.079430149 | TMEM115  |
| 0.079430149 | RAD51D   |
| 0.079436438 | C16orf74 |
| 0.079550592 | NA       |
| 0.079604316 | PCNT     |
| 0.079666189 | LAS1L    |
| 0.07973659  | HYAL1    |
| 0.079817112 | ATP5F1B  |
| 0.079849202 | TDRD5    |
| 0.079897928 | POP5     |
| 0.079897928 | TVP23B   |
| 0.079897928 | NA       |
| 0.079911956 | NA       |
| 0.079919389 | SMOX     |
| 0.0801538   | ZNF268   |
| 0.080351503 | TARS2    |
| 0.080425398 | VIM-AS1  |
| 0.080425398 | NA       |
| 0.080498457 | ACTL10   |
| 0.08054191  | C1orf116 |
| 0.08054191  | ATP13A2  |

|             |            |
|-------------|------------|
| 0.080879697 | FUT1       |
| 0.080879697 | UQCRC1     |
| 0.081033791 | MIDEAS     |
| 0.081033791 | VWA1       |
| 0.081055467 | ZNF461     |
| 0.081055467 | DPYSL3     |
| 0.08125796  | FAM171A1   |
| 0.081266176 | FBXO48     |
| 0.081266176 | FKBP15     |
| 0.081315927 | FAM104A    |
| 0.081315927 | TMTC4      |
| 0.081315927 | PLGRKT     |
| 0.081367937 | ARHGAP29   |
| 0.08150367  | PRDX3      |
| 0.08150367  | LINC00654  |
| 0.081557991 | NA         |
| 0.081692028 | PI4K2A     |
| 0.08184255  | IL22RA1    |
| 0.08184255  | LANCL1     |
| 0.08184255  | NA         |
| 0.08184255  | NA         |
| 0.081848247 | DPH3       |
| 0.081848247 | SEPHS1     |
| 0.081896725 | AIFM2      |
| 0.081896725 | RPUSD2     |
| 0.082112308 | NA         |
| 0.082220364 | LINC01134  |
| 0.082289544 | GPBAR1     |
| 0.082289544 | CCDC9      |
| 0.082349389 | SFR1       |
| 0.082350866 | UMPS       |
| 0.082352372 | ASL        |
| 0.082352372 | RBBP7      |
| 0.082367367 | LIG4       |
| 0.082369474 | POLR3H     |
| 0.082518904 | LHFPL3-AS2 |
| 0.082578275 | CKMT1B     |
| 0.0826058   | WDR7       |
| 0.082851095 | PRRT4      |
| 0.083102779 | RPP40      |
| 0.083102779 | TMEM107    |
| 0.083102779 | ISG20      |
| 0.083159997 | NA         |
| 0.083214026 | LCA5       |
| 0.083280189 | ERLIN1     |
| 0.083285941 | CDCA4      |
| 0.083285941 | NRIP1      |

|             |          |
|-------------|----------|
| 0.083285941 | AIFM1    |
| 0.083285941 | RRAGC    |
| 0.083285941 | RAB3GAP1 |
| 0.083285941 | MTF1     |
| 0.083662795 | AMBRA1   |
| 0.083662795 | MRPS18B  |
| 0.083662795 | ANKRD36  |
| 0.083662795 | FKBP14   |
| 0.083842817 | PELP1    |
| 0.083842817 | CNTNAP1  |
| 0.083922421 | H2AC6    |
| 0.083922421 | ZNF775   |
| 0.083922421 | UNC5A    |
| 0.083934103 | ACTL8    |
| 0.084097329 | PTCD3    |
| 0.084165242 | PES1     |
| 0.084182182 | CLCF1    |
| 0.084282643 | CHCHD10  |
| 0.084282643 | SELENOS  |
| 0.08438083  | SUGP2    |
| 0.08438083  | PKP3     |
| 0.08438083  | KIAA0895 |
| 0.084430018 | CEP41    |
| 0.084430018 | SCN11A   |
| 0.084498261 | LYPD6    |
| 0.084498261 | ZNF264   |
| 0.084498261 | P4HB     |
| 0.084517736 | MZT1     |
| 0.084517736 | NA       |
| 0.084528158 | NA       |
| 0.084528158 | NA       |
| 0.084616869 | DERL2    |
| 0.084720068 | CPSF1    |
| 0.084760445 | MIR324   |
| 0.084788859 | CDK13    |
| 0.084826344 | NIPBL    |
| 0.084897006 | PMP22    |
| 0.084898634 | DTL      |
| 0.084898634 | SEMA6B   |
| 0.084978422 | NA       |
| 0.085171001 | SLC35F5  |
| 0.085259798 | XYLT2    |
| 0.085512584 | FAM13B   |
| 0.085603743 | TMBIM1   |
| 0.085631178 | NIPAL2   |
| 0.085650855 | DFFB     |
| 0.085690568 | METTTL27 |

|             |           |
|-------------|-----------|
| 0.085690568 | PIGX      |
| 0.085782003 | NA        |
| 0.085782003 | TCFL5     |
| 0.085923073 | TRMT61A   |
| 0.085923073 | THEM6     |
| 0.086004985 | CDC14A    |
| 0.086251773 | FLVCR1    |
| 0.086261778 | SLC45A4   |
| 0.086261778 | SETD1B    |
| 0.086261778 | APEX2     |
| 0.086261778 | GCC2      |
| 0.086261778 | PLAC8L1   |
| 0.086450432 | PRPF18    |
| 0.086696616 | PLA2G15   |
| 0.086847313 | NUDT14    |
| 0.086847313 | PLEKHA6   |
| 0.086847313 | NA        |
| 0.086851707 | ZNF618    |
| 0.086974346 | RAB11FIP5 |
| 0.087092334 | NA        |
| 0.087138914 | SCMH1     |
| 0.087267376 | NA        |
| 0.087297967 | CFAP53    |
| 0.087347146 | KLHL13    |
| 0.087451041 | ANKRD49   |
| 0.087538035 | SCPEP1    |
| 0.0875497   | SENP5     |
| 0.0875497   | NUP107    |
| 0.0875497   | NFIL3     |
| 0.0875497   | TBC1D30   |
| 0.087571542 | KPNA4     |
| 0.087571542 | FBL       |
| 0.087571542 | EPDR1     |
| 0.087571542 | NT5DC2    |
| 0.087603464 | NA        |
| 0.087603464 | BTAF1     |
| 0.087675841 | BEX3      |
| 0.087881607 | TLK2      |
| 0.088018234 | ATG7      |
| 0.088018234 | SLC44A2   |
| 0.088093077 | LYRM1     |
| 0.088312008 | DEDD      |
| 0.088339025 | OSBPL6    |
| 0.088339025 | FANCG     |
| 0.088339025 | YIPF4     |
| 0.088344178 | TENT5B    |
| 0.088344178 | ARHGEF35  |

|             |             |
|-------------|-------------|
| 0.088497766 | SLCO2B1     |
| 0.088513468 | FBXO4       |
| 0.088543593 | SEPTIN11    |
| 0.088543593 | MRPS9-AS2   |
| 0.088543593 | PNKD        |
| 0.088543593 | ZNF211      |
| 0.088618363 | CASC8       |
| 0.088640214 | MARCO       |
| 0.088655097 | PHLDB2      |
| 0.088729928 | TMEM223     |
| 0.088756265 | KIAA0232    |
| 0.088801451 | LFNG        |
| 0.088888181 | NA          |
| 0.08916331  | C1orf35     |
| 0.089322178 | IARS2       |
| 0.089322178 | NA          |
| 0.089322178 | DIO1        |
| 0.089322178 | ACADS       |
| 0.089525764 | HAUS6       |
| 0.089624191 | NMT2        |
| 0.089701114 | DPM3        |
| 0.089846872 | RNF26       |
| 0.089873186 | GMPS        |
| 0.089881575 | PTPN18      |
| 0.08997341  | SRBD1       |
| 0.090043549 | ZNF655      |
| 0.090104544 | PTGFRN      |
| 0.090113925 | CBX1        |
| 0.090113925 | NUTF2       |
| 0.090305464 | GTF2IRD2    |
| 0.090310065 | NA          |
| 0.090310065 | SYTL3       |
| 0.090461118 | TBC1D22B    |
| 0.090461118 | TBC1D12     |
| 0.090481923 | FAM222A-AS1 |
| 0.090698595 | PRSS8       |
| 0.090725988 | EVI5        |
| 0.090725988 | ZNF304      |
| 0.090725988 | IFITM10     |
| 0.091404072 | ZNF181      |
| 0.091591429 | FBR5        |
| 0.091591429 | NPC1        |
| 0.091656297 | PLCE1       |
| 0.091656297 | FDXACB1     |
| 0.091781347 | PLEKHA3     |
| 0.091822543 | BCL2        |
| 0.091959302 | PLCG1       |



|             |              |
|-------------|--------------|
| 0.092087111 | PANK4        |
| 0.092087111 | MTO1         |
| 0.092087111 | UBTD1        |
| 0.092087111 | AFG3L2       |
| 0.092199445 | DOK7         |
| 0.09231731  | ATP6V0E1     |
| 0.092424764 | ZSWIM4       |
| 0.092424764 | NA           |
| 0.09252641  | VAV2         |
| 0.09252641  | TVP23C       |
| 0.092607747 | SMYD5        |
| 0.092607747 | VDAC1        |
| 0.092607747 | CCDC13       |
| 0.092761202 | SNORD63      |
| 0.092761202 | NA           |
| 0.092761202 | ATP5F1D      |
| 0.092761202 | NA           |
| 0.092761202 | MKRN1        |
| 0.092853914 | NA           |
| 0.092853914 | DNAH5        |
| 0.092898399 | NA           |
| 0.092917588 | CRB3         |
| 0.093012249 | LOC107984450 |
| 0.093071979 | MKNK2        |
| 0.093083926 | NT5C2        |
| 0.093083926 | DMXL1        |
| 0.093254909 | LZTS1        |
| 0.093258566 | TMCO6        |
| 0.093258566 | ASPSCR1      |
| 0.093334152 | JMJD1C       |
| 0.093419268 | PGM3         |
| 0.093460832 | NA           |
| 0.093460832 | ATP6V0D1     |
| 0.093460832 | MIS12        |
| 0.093476058 | RETREG3      |
| 0.093476058 | TOB2         |
| 0.093476058 | NA           |
| 0.093519128 | EOLA1        |
| 0.093820422 | GRIN1        |
| 0.093928966 | ADORA1       |
| 0.094010895 | ATR          |
| 0.094114008 | RNF181       |
| 0.094243792 | TEX19        |
| 0.094310154 | DNASE1       |
| 0.094310154 | LINC00943    |
| 0.094598705 | NA           |
| 0.094614023 | SH3BP5-AS1   |

|             |              |
|-------------|--------------|
| 0.094753817 | PSMG4        |
| 0.094806145 | NA           |
| 0.095068757 | OR51B6       |
| 0.095276558 | NA           |
| 0.095276558 | TSC22D4      |
| 0.095597404 | EBNA1BP2     |
| 0.095678984 | IL10RB       |
| 0.095892187 | KIF26A       |
| 0.095911235 | TRPM4        |
| 0.095911235 | DGKG         |
| 0.095911235 | BOLA3        |
| 0.095978823 | CBL          |
| 0.09598141  | ILVBL        |
| 0.09598141  | ZNF417       |
| 0.096157558 | LRRK1        |
| 0.09622278  | LYPD5        |
| 0.096398254 | CCDC61       |
| 0.096398254 | GPBP1        |
| 0.096398254 | RIPK4        |
| 0.096437048 | CARD8        |
| 0.096437048 | SYNGAP1      |
| 0.096546703 | CSNK1G3      |
| 0.096546703 | HOTAIRM1     |
| 0.096572198 | NA           |
| 0.096626246 | NA           |
| 0.096626246 | FAAH2        |
| 0.096663687 | CCDC181      |
| 0.09672417  | WDR49        |
| 0.09672417  | TMEM240      |
| 0.096991538 | H3C4         |
| 0.097041414 | ELL          |
| 0.097041414 | LOC102723566 |
| 0.097041414 | LINC01115    |
| 0.097041414 | LCMT1-AS2    |
| 0.097212033 | GALNT18      |
| 0.097226041 | AOC4P        |
| 0.097226041 | NA           |
| 0.097226041 | LOC100133315 |
| 0.097226041 | PIN1         |
| 0.097407151 | ARHGDIA      |
| 0.097407151 | BAIAP2       |
| 0.097677981 | KHNYN        |
| 0.097678839 | ANP32B       |
| 0.097798974 | HNRNPU       |
| 0.097798974 | TBL3         |
| 0.097848844 | LRP5         |
| 0.097848844 | NA           |

|             |              |
|-------------|--------------|
| 0.097924948 | GRK6         |
| 0.097924948 | SACS         |
| 0.097987538 | TAOK3        |
| 0.098032352 | NRG1         |
| 0.098032352 | TLCD3B       |
| 0.098044086 | SMARCC1      |
| 0.098274983 | ZNF814       |
| 0.098347477 | NA           |
| 0.098347477 | USP47        |
| 0.098459772 | RNU6-216P    |
| 0.098459772 | CTSL         |
| 0.098492062 | FST          |
| 0.098550692 | NA           |
| 0.098550692 | CUTA         |
| 0.098550692 | RTKN         |
| 0.098550692 | CETN3        |
| 0.098559323 | ELFN2        |
| 0.098559323 | NAT10        |
| 0.098562783 | NA           |
| 0.098694701 | SLC35A2      |
| 0.098723412 | ARFGEF3      |
| 0.09873911  | DCAF5        |
| 0.099018878 | MAP3K7CL     |
| 0.099170608 | NA           |
| 0.099220967 | MKRN2        |
| 0.099250703 | LOC100379224 |
| 0.099358661 | COL9A2       |
| 0.099415664 | DHRS4L2      |
| 0.099415664 | SH2D2A       |
| 0.099483399 | SLC16A9      |
| 0.099606386 | AFF1         |
| 0.099627802 | USP31        |
| 0.099778691 | RPL34-DT     |
| 0.099778691 | LINC01589    |
| 0.099926679 | DPH6         |
| 0.099926679 | PIGZ         |
| 0.099926679 | NA           |
| 0.099990232 | NA           |
| 0.099990232 | TMED5        |
| 0.099990232 | ALKBH3       |
| 0.099990232 | SUN3         |
| 0.099990232 | KCTD10       |
| 0.099990232 | NA           |
| 0.099990232 | PSAT1        |
| 0.099990232 | DIP2C        |
| 0.099990232 | GGH          |
| 0.099990232 | NA           |

|             |           |
|-------------|-----------|
| 0.099990232 | FAM86EP   |
| 0.099990232 | ZNF77     |
| 0.099990232 | CDNF      |
| 0.100013631 | ODAPH     |
| 0.100013631 | SLC25A19  |
| 0.100013631 | GPR107    |
| 0.100013631 | PDE4DIPP6 |
| 0.100013631 | NA        |
| 0.100257822 | ZNF559    |
| 0.100363401 | RUBCN     |
| 0.100412104 | FPGS      |
| 0.10044542  | NUTM1     |
| 0.100451    | WIPF2     |
| 0.100451    | FDXR      |
| 0.100470018 | C3orf80   |
| 0.100787192 | LSM6      |
| 0.100787192 | ANKRD9    |
| 0.100920185 | PGAM5     |
| 0.100920185 | NA        |
| 0.101084806 | ASH2LP3   |
| 0.101118121 | TMEM109   |
| 0.101224838 | NCKIPSD   |
| 0.10136784  | MTMR9     |
| 0.101483343 | PLEKHF2   |
| 0.101488479 | MAFB      |
| 0.101488479 | ZNF527    |
| 0.101575471 | TMEM234   |
| 0.101595385 | TPM2      |
| 0.101745381 | EEF1AKMT1 |
| 0.1018365   | ZNF782    |
| 0.101984454 | UBQLN4    |
| 0.102049121 | TAMM41    |
| 0.102111466 | FAM102A   |
| 0.102111466 | FAM217B   |
| 0.102249548 | PPIL1     |
| 0.102249548 | RO60      |
| 0.102249548 | MSH3      |
| 0.102249548 | XRRRA1    |
| 0.102450394 | TMA7      |
| 0.102450394 | SPAG1     |
| 0.102642867 | NA        |
| 0.102642867 | NA        |
| 0.102646185 | NA        |
| 0.10264686  | HEATR1    |
| 0.10264686  | C12orf50  |
| 0.102700927 | DENND4B   |
| 0.102701385 | NA        |

|             |           |
|-------------|-----------|
| 0.102704139 | LOC648987 |
| 0.102704139 | RAB2B     |
| 0.102898543 | RPA3      |
| 0.102898543 | MIR621    |
| 0.102949605 | RC3H1     |
| 0.102949605 | ZNF136    |
| 0.103174145 | NKX3-1    |
| 0.103331844 | ABCG4     |
| 0.103421236 | NA        |
| 0.103439508 | NA        |
| 0.103439508 | NA        |
| 0.10344459  | NIPSNAP2  |
| 0.10344459  | NKAPL     |
| 0.103459421 | ZMYND19   |
| 0.103459421 | NA        |
| 0.103459421 | TRPV1     |
| 0.103459421 | LINC01278 |
| 0.103544529 | WRAP73    |
| 0.10373098  | OSBPL2    |
| 0.10373098  | NA        |
| 0.10373098  | GPD2      |
| 0.10373098  | ARMC4     |
| 0.10373098  | AQP8      |
| 0.103771058 | BIRC2     |
| 0.103781263 | CLEC4O    |
| 0.103781263 | NELFB     |
| 0.103931165 | GPR25     |
| 0.103931165 | NXT1      |
| 0.103982773 | ATG13     |
| 0.103982773 | NPRL3     |
| 0.103982773 | EXOSC7    |
| 0.104178247 | NA        |
| 0.104291792 | NKD2      |
| 0.104291792 | CFL1      |
| 0.104327415 | ZSCAN22   |
| 0.104709619 | TRIM23    |
| 0.104709619 | LINC02323 |
| 0.104771567 | KRT18P31  |
| 0.104967994 | BEX2      |
| 0.104967994 | ALDH3B1   |
| 0.105053489 | PYROXD1   |
| 0.105053489 | ZPLD1     |
| 0.105053489 | FASTKD5   |
| 0.105053489 | AGPAT5    |
| 0.105090587 | PRKACB    |
| 0.105213756 | SRSF12    |
| 0.10523047  | NOTCH4    |

|             |           |
|-------------|-----------|
| 0.105318699 | CLCN2     |
| 0.105318699 | GNMT      |
| 0.105318699 | NA        |
| 0.105318699 | NA        |
| 0.105411386 | PATZ1     |
| 0.105802466 | ALAS1     |
| 0.105827495 | TCHP      |
| 0.105932602 | LINC01267 |
| 0.106015061 | MNX1-AS1  |
| 0.106215955 | SLC38A5   |
| 0.106378259 | NA        |
| 0.106379347 | STAM2     |
| 0.106379347 | SYF2      |
| 0.106379347 | TMEM14A   |
| 0.106379347 | TRIM52    |
| 0.106379347 | RHPN1     |
| 0.10661719  | KIF1B     |
| 0.10705913  | RAP1GAP2  |
| 0.10713231  | NA        |
| 0.10722977  | ASB7      |
| 0.107258448 | TMEM129   |
| 0.107265458 | COA4      |
| 0.107265458 | ZC3H12C   |
| 0.107361183 | NSG2      |
| 0.107449501 | NA        |
| 0.107449501 | WDR77     |
| 0.107546544 | AP4M1     |
| 0.107596012 | GLDC      |
| 0.107634603 | EFCAB13   |
| 0.107634603 | COPB2     |
| 0.107772465 | NA        |
| 0.107978024 | TTYH1     |
| 0.108017047 | ZMAT3     |
| 0.108208984 | DYRK1A    |
| 0.108245941 | AHCY      |
| 0.108545168 | TMCC1-AS1 |
| 0.108545168 | AKR7A2    |
| 0.10858314  | SNORD60   |
| 0.10858314  | NA        |
| 0.108650774 | TARS1     |
| 0.108650774 | APOL2     |
| 0.108650774 | S1PR5     |
| 0.108650774 | FUOM      |
| 0.108671714 | NAXE      |
| 0.108704365 | TERF2IP   |
| 0.108795832 | DNAJC11   |
| 0.108795832 | ABCA7     |

|             |            |
|-------------|------------|
| 0.108921072 | ZNF91      |
| 0.108921072 | NA         |
| 0.108936997 | CDKN2AIPNL |
| 0.109441746 | CTPS2      |
| 0.10953182  | LOC257396  |
| 0.109552934 | LSM14B     |
| 0.109881773 | TNFRSF18   |
| 0.11013837  | TANGO2     |
| 0.110177171 | THAP5      |
| 0.110247177 | TRIM68     |
| 0.110247177 | GCAT       |
| 0.110247177 | SBDSP1     |
| 0.11058453  | TBC1D10A   |
| 0.110633556 | FAM107B    |
| 0.110903749 | MOV10      |
| 0.110969649 | HSPA1L     |
| 0.110969649 | BBIP1      |
| 0.110969649 | TESK2      |
| 0.111042686 | TCF3       |
| 0.111130283 | MUTYH      |
| 0.111152442 | PUDP       |
| 0.111152442 | GPR61      |
| 0.111159921 | EP300      |
| 0.111288474 | CLTB       |
| 0.111365802 | CSRNP2     |
| 0.111400649 | CFDP1      |
| 0.111558525 | ENOPH1     |
| 0.111558525 | C9orf116   |
| 0.11157403  | LRRC41     |
| 0.11157403  | ZMYND15    |
| 0.111650307 | TMEM225B   |
| 0.111650307 | SRRM5      |
| 0.111661007 | SLC6A17    |
| 0.111787426 | TUBA4B     |
| 0.111787426 | AFAP1L1    |
| 0.111814854 | PHLDA3     |
| 0.111814854 | NAXD       |
| 0.111862626 | MGAT5B     |
| 0.111862626 | HAUS7      |
| 0.111862626 | LAD1       |
| 0.112155144 | SHKBP1     |
| 0.112155144 | EXOSC9     |
| 0.112155144 | SNX31      |
| 0.112155144 | NA         |
| 0.112155144 | FEM1B      |
| 0.112155144 | SLC6A8     |
| 0.112225667 | NA         |

|             |              |
|-------------|--------------|
| 0.112341755 | NA           |
| 0.112430262 | NA           |
| 0.112824982 | SIKE1        |
| 0.112948762 | GTPBP3       |
| 0.113068414 | SAR1B        |
| 0.113113177 | NA           |
| 0.113113177 | LOC100129931 |
| 0.113250658 | ZCCHC8       |
| 0.113349202 | CSNK2A2      |
| 0.113389906 | LDLRAD3      |
| 0.113389906 | HIPK1        |
| 0.113486143 | ACHE         |
| 0.113525583 | LUARIS       |
| 0.11390403  | FMO1         |
| 0.113937659 | GALNT11      |
| 0.113937659 | GHITM        |
| 0.114186212 | TRHDE        |
| 0.114186212 | LOC100506302 |
| 0.114341966 | NA           |
| 0.114356682 | CAPS2        |
| 0.114356682 | ZNF16        |
| 0.114388565 | NA           |
| 0.114426115 | CAPN15       |
| 0.114580653 | PEX10        |
| 0.114580653 | GOLGA2       |
| 0.114604247 | PTPRVP       |
| 0.114604247 | LINC01238    |
| 0.114604247 | ENTPD5       |
| 0.114604247 | TMEM156      |
| 0.114604247 | IPPK         |
| 0.114604247 | ZNF134       |
| 0.114737945 | UBE2V1P5     |
| 0.114737945 | INPP5K       |
| 0.114737945 | LYG1         |
| 0.114737945 | TRGV4        |
| 0.115148004 | ABI1         |
| 0.115148004 | NA           |
| 0.115287298 | NA           |
| 0.115805241 | SETD6        |
| 0.115805241 | ZNF603P      |
| 0.11591001  | NA           |
| 0.115922155 | NA           |
| 0.115922155 | PRDM6        |
| 0.115922155 | RSL24D1      |
| 0.116035037 | COMTD1       |
| 0.116104085 | MCM8         |
| 0.116224656 | TAS2R20      |



|             |          |
|-------------|----------|
| 0.116224656 | GTF2B    |
| 0.116224656 | PHLDB1   |
| 0.116224656 | FRZB     |
| 0.116224656 | ADAMTS1  |
| 0.116321808 | UBE2G2   |
| 0.116323361 | RTEL1    |
| 0.116323361 | FANCB    |
| 0.116367503 | CNNM1    |
| 0.116475617 | NA       |
| 0.116489    | RNF111   |
| 0.116702214 | CIRBP    |
| 0.116702214 | NA       |
| 0.116702214 | MEAK7    |
| 0.116702214 | KIF1C    |
| 0.116702214 | APTR     |
| 0.116702214 | PCIF1    |
| 0.116702214 | NA       |
| 0.116729316 | NA       |
| 0.11678058  | NA       |
| 0.116934048 | TTLL7    |
| 0.116990544 | TXNL4A   |
| 0.117023309 | RFPL4A   |
| 0.117140721 | MFF-DT   |
| 0.117140721 | SMCR8    |
| 0.117164748 | NA       |
| 0.117164748 | RGPD8    |
| 0.117173357 | DENND2B  |
| 0.117173357 | NA       |
| 0.117173357 | MPHOSPH6 |
| 0.117173357 | DNAJA1   |
| 0.117173357 | HNRNPAB  |
| 0.117173357 | RTN4IP1  |
| 0.117237106 | ACOXL    |
| 0.117237106 | CCDC138  |
| 0.117237106 | RPS10P11 |
| 0.117237106 | GIGYF1   |
| 0.117303492 | CD14     |
| 0.117406841 | NA       |
| 0.117558091 | ISOC1    |
| 0.117558091 | GJB4     |
| 0.117808696 | CDK5RAP3 |
| 0.117898359 | IQCC     |
| 0.117960442 | NA       |
| 0.118089045 | DHCR24   |
| 0.118089045 | HOXA13   |
| 0.118141751 | NA       |
| 0.118156671 | NA       |

|             |              |
|-------------|--------------|
| 0.118241919 | FERMT1       |
| 0.118328072 | MGAM2        |
| 0.118430064 | SPOUT1       |
| 0.118452785 | SLC25A38     |
| 0.118541968 | SERPINI1     |
| 0.119114876 | PPP1R26-AS1  |
| 0.119114876 | RPL32P3      |
| 0.119114876 | MMAB         |
| 0.119114876 | UTP18        |
| 0.119171541 | DOCK8        |
| 0.119178539 | LINC00173    |
| 0.119178539 | PSMC4        |
| 0.119178539 | TFB2M        |
| 0.119382666 | NA           |
| 0.119632093 | HYLS1        |
| 0.119632093 | SAT2         |
| 0.119632093 | PSIP1        |
| 0.119638393 | METTL4       |
| 0.119661932 | NA           |
| 0.119840062 | MLST8        |
| 0.11984506  | ACVR2A       |
| 0.11984506  | NA           |
| 0.119948628 | SNRPE        |
| 0.120016401 | DNAJB11      |
| 0.120049303 | TRMT10A      |
| 0.120049303 | NA           |
| 0.120077214 | PYGL         |
| 0.120110158 | C8orf88      |
| 0.120684332 | REST         |
| 0.120688133 | ZMAT5        |
| 0.120688133 | NA           |
| 0.120784279 | LNPK         |
| 0.120943222 | RASL12       |
| 0.120943222 | ATF6         |
| 0.120996053 | NA           |
| 0.121028906 | SKA2         |
| 0.121053944 | FGFR4        |
| 0.121053944 | CCM2         |
| 0.121065139 | ATP5MF-PTCD1 |
| 0.121136586 | ARG1         |
| 0.121136586 | CCDC77       |
| 0.121175629 | C15orf65     |
| 0.121203397 | PLRG1        |
| 0.121355888 | MRPL16       |
| 0.121448784 | NA           |
| 0.121452335 | ADAM32       |
| 0.121452335 | LRP8         |

|             |          |
|-------------|----------|
| 0.121665197 | TTC17    |
| 0.121751587 | TOMM40   |
| 0.121774823 | NA       |
| 0.121774846 | RAPH1    |
| 0.121801795 | UNKL     |
| 0.121853292 | DIXDC1   |
| 0.12187026  | PRMT3    |
| 0.121987128 | MPP2     |
| 0.121990546 | GDE1     |
| 0.121990546 | IL15     |
| 0.121990546 | SDC4     |
| 0.122005811 | LRR8E    |
| 0.122005811 | MBD1     |
| 0.122095568 | PNRC1    |
| 0.122142824 | BTN2A2   |
| 0.122236135 | PAPPA2   |
| 0.122247142 | PXMP4    |
| 0.122247142 | TRIP4    |
| 0.122247142 | ATP5F1A  |
| 0.122247142 | NA       |
| 0.122247142 | ACOT7    |
| 0.122303794 | SELENOM  |
| 0.122303794 | MCCC2    |
| 0.12231429  | CREBBP   |
| 0.12231429  | C1orf159 |
| 0.122391106 | NA       |
| 0.122405164 | POU6F1   |
| 0.122405164 | NRG4     |
| 0.122490311 | NA       |
| 0.122490888 | PRSS23   |
| 0.122559774 | SLC5A5   |
| 0.122584716 | ANKRD27  |
| 0.122596183 | DMKN     |
| 0.122650196 | SERPINB7 |
| 0.122650196 | RELT     |
| 0.122684334 | NA       |
| 0.122755173 | NA       |
| 0.122755173 | ZC3H12D  |
| 0.122931723 | NA       |
| 0.122931723 | NA       |
| 0.122962169 | VDAC3    |
| 0.122965978 | PJA1     |
| 0.123059466 | ACTG1P14 |
| 0.123176806 | CXCL10   |
| 0.123176806 | DNAJB4   |
| 0.12337378  | TBC1D20  |
| 0.12337378  | KIAA2012 |

|             |             |
|-------------|-------------|
| 0.12337378  | NPW         |
| 0.12337378  | COL5A2      |
| 0.123494053 | RBBP4       |
| 0.123494624 | N4BP2L2     |
| 0.123494624 | LAGE3       |
| 0.123558842 | GPRIN1      |
| 0.123774705 | GPAM        |
| 0.123787268 | CEACAM19    |
| 0.123948858 | MIR4435-2HG |
| 0.123948858 | AGO3        |
| 0.12396449  | NA          |
| 0.124038316 | ATF7IP2     |
| 0.124194496 | POLR1E      |
| 0.124327628 | YEATS4      |
| 0.124327628 | CDK7        |
| 0.12445266  | CCDC106     |
| 0.124647196 | ABHD14A     |
| 0.124647196 | TTC6        |
| 0.124647196 | NA          |
| 0.124843938 | PSMA6       |
| 0.125162637 | TRIP11      |
| 0.125180983 | TBC1D16     |
| 0.125180983 | ASB16       |
| 0.125204131 | NUP133      |
| 0.125204131 | NA          |
| 0.125204131 | TRPM3       |
| 0.125204131 | MRPL23-AS1  |
| 0.125204131 | ZNF845      |
| 0.125204131 | HEATR3      |
| 0.125246733 | MAPKAPK3    |
| 0.125246733 | PPP6R2      |
| 0.125250516 | NA          |
| 0.125250516 | OPTN        |
| 0.125250516 | ARID4B      |
| 0.125250516 | MED19       |
| 0.125250516 | LTBP4       |
| 0.125250516 | RBCK1       |
| 0.125250516 | MVK         |
| 0.125565096 | FAAP100     |
| 0.12562369  | SAMD10      |
| 0.125697408 | NA          |
| 0.125792199 | UCHL3       |
| 0.125801196 | CHM         |
| 0.125854311 | GLI4        |
| 0.125854311 | ZNF707      |
| 0.125888071 | CCNG2P1     |
| 0.125893548 | MESP1       |

|             |            |
|-------------|------------|
| 0.125946614 | RFPL2      |
| 0.125946614 | TOLLIP     |
| 0.125946614 | VN1R108P   |
| 0.125946614 | C3orf38    |
| 0.125946614 | AKT1S1     |
| 0.125946614 | MAPRE3-AS1 |
| 0.126085515 | ZNF112     |
| 0.126085515 | TMEM88     |
| 0.126127325 | WDR45B     |
| 0.126136931 | PRKG1      |
| 0.126252386 | ZNF692     |
| 0.126540468 | CCNYL6     |
| 0.126577327 | SEC61A1    |
| 0.126577327 | LMTK2      |
| 0.126577327 | DDX55      |
| 0.126577327 | FAM111A    |
| 0.126678073 | GOLGA7     |
| 0.126678073 | NA         |
| 0.126678073 | AHCYP2     |
| 0.126678073 | NA         |
| 0.126678073 | IDH1       |
| 0.126844719 | NA         |
| 0.126844719 | TSR3       |
| 0.126844719 | NA         |
| 0.126844719 | ZNF543     |
| 0.126988848 | DDIT4      |
| 0.127179556 | MRPL15     |
| 0.127355209 | C6orf52    |
| 0.127404449 | TIMM21     |
| 0.128177901 | DMAC1      |
| 0.128177901 | NA         |
| 0.128177901 | CWC22      |
| 0.128177901 | USP49      |
| 0.128252805 | GLB1L      |
| 0.128533562 | WDR6       |
| 0.128533562 | NOLC1      |
| 0.12858008  | MRI1       |
| 0.128597546 | ANGPTL8    |
| 0.128693772 | COQ9       |
| 0.128693772 | ZNF875     |
| 0.128722361 | OSGEPL1    |
| 0.128790065 | ZNF225     |
| 0.128790684 | SEPTIN5    |
| 0.128790684 | OSTM1      |
| 0.128790684 | FCGRT      |
| 0.128790684 | SNORD104   |
| 0.128790684 | NA         |

|             |           |
|-------------|-----------|
| 0.128849344 | RNF19B    |
| 0.128858186 | TTC41P    |
| 0.129018161 | GLRX2     |
| 0.129145467 | NA        |
| 0.129145467 | ZNF230    |
| 0.129145467 | NA        |
| 0.129153741 | YPEL1     |
| 0.129355479 | LOC392196 |
| 0.129482685 | CRYBG3    |
| 0.129510523 | NA        |
| 0.129585854 | NSMCE3    |
| 0.129627191 | EOLA2     |
| 0.129673423 | NT5E      |
| 0.12984014  | NPHP4     |
| 0.129882445 | NA        |
| 0.129936864 | TTC1      |
| 0.129951794 | LINC01265 |
| 0.129951794 | NA        |
| 0.130441324 | NA        |
| 0.130547146 | NKAPD1    |
| 0.130547146 | MED13     |
| 0.130547146 | FAM86C1P  |
| 0.130804054 | LINC01123 |
| 0.130925733 | STAM      |
| 0.131036496 | CHP1      |
| 0.131161153 | ZFX       |
| 0.13123593  | NA        |
| 0.13123593  | MMADHC    |
| 0.131277824 | PLEKHG2   |
| 0.131486478 | PSENEN    |
| 0.131748315 | CANX      |
| 0.131806525 | ZNF594    |
| 0.131924111 | ALDH7A1   |
| 0.131924111 | SERBP1    |
| 0.131940569 | SPTY2D1OS |
| 0.131968266 | MYO16     |
| 0.13238571  | VN1R110P  |
| 0.132440698 | CDK2AP1   |
| 0.132529179 | LINC02481 |
| 0.132739078 | LINC01405 |
| 0.132742266 | ZNF45     |
| 0.133061395 | NA        |
| 0.133186633 | TMEM106C  |
| 0.133191812 | PAK1IP1   |
| 0.133191812 | NA        |
| 0.133272092 | MMP20     |
| 0.133272092 | TRIM66    |

|             |              |
|-------------|--------------|
| 0.133394849 | BTN2A3P      |
| 0.133509625 | CLK2         |
| 0.133545225 | ACBD3        |
| 0.133812597 | ZNF431       |
| 0.133970123 | NBPF1        |
| 0.133970123 | ZNF92        |
| 0.133970123 | NA           |
| 0.134052216 | WAC          |
| 0.134132616 | NA           |
| 0.134132616 | WDFY3        |
| 0.134166952 | TSEN2        |
| 0.134166952 | MTHFD2L      |
| 0.134186555 | AKAP17A      |
| 0.134186555 | CGAS         |
| 0.134186555 | ITPRID2      |
| 0.134186555 | RHNO1        |
| 0.134209613 | BDKRB2       |
| 0.134326123 | NA           |
| 0.134359832 | TACC2        |
| 0.13439979  | CD200        |
| 0.134400522 | BCL2L2       |
| 0.134509784 | NA           |
| 0.134604134 | UBXN1        |
| 0.134618906 | CBLL1        |
| 0.135043316 | TNFSF15      |
| 0.135246144 | NA           |
| 0.135302666 | NA           |
| 0.135555348 | NA           |
| 0.135817825 | BAAT         |
| 0.136095527 | ECHDC3       |
| 0.136095527 | NA           |
| 0.136147014 | PLEKHS1      |
| 0.136249951 | ANKRD53      |
| 0.136290967 | POLR1C       |
| 0.136476987 | HSD11B2      |
| 0.136476987 | ECI2-DT      |
| 0.136494479 | HBE1         |
| 0.136498965 | BAK1         |
| 0.136498965 | NA           |
| 0.136585999 | PAXIP1       |
| 0.136597527 | LOC100506282 |
| 0.136629393 | LYRM7        |
| 0.136629393 | GNAI1        |
| 0.136629393 | FAM136A      |
| 0.136801261 | ZMYM2        |
| 0.136814625 | SLC7A5       |
| 0.136851106 | RPGRIP1L     |

|             |               |
|-------------|---------------|
| 0.136885046 | FBXO46        |
| 0.137297067 | RBM7          |
| 0.137303659 | RTF2          |
| 0.137303659 | CDC6          |
| 0.137406985 | ZNF81         |
| 0.137406985 | PCBP4         |
| 0.137406985 | EHMT1         |
| 0.137569654 | LOC171391     |
| 0.137569654 | METTTL25      |
| 0.137573309 | GALK1         |
| 0.137573309 | NA            |
| 0.137612365 | HSPA5P1       |
| 0.137612365 | JMJD7-PLA2G4B |
| 0.137704297 | GGCX          |
| 0.137704297 | FGF7          |
| 0.137704297 | NUP58         |
| 0.13778191  | ACY1          |
| 0.137845347 | ZNF513        |
| 0.137963412 | SUV39H2       |
| 0.137963412 | CSNK1A1       |
| 0.137995827 | LRRC4         |
| 0.138153053 | LINC01484     |
| 0.138154237 | USP30         |
| 0.138282876 | MAMLD1        |
| 0.138282876 | THAP2         |
| 0.138310003 | ARRDC1        |
| 0.138310003 | NA            |
| 0.13847497  | BNIP1         |
| 0.138494101 | PPP1R35       |
| 0.13858693  | AAR2          |
| 0.13864329  | CEP250        |
| 0.13864329  | NA            |
| 0.13864329  | RASGEF1C      |
| 0.13864329  | ZNF821        |
| 0.13864329  | SLC7A2        |
| 0.13864329  | TTC27         |
| 0.13864329  | CATSPERD      |
| 0.138690577 | SUSD6         |
| 0.138834126 | SORD          |
| 0.138834126 | ERCC2         |
| 0.138902588 | NA            |
| 0.138951526 | TYRO3         |
| 0.138964676 | OTULINL       |
| 0.139392319 | ABHD17B       |
| 0.139683047 | NOXRED1       |
| 0.139722762 | TCTE1         |
| 0.139722762 | AP4B1         |



|             |            |
|-------------|------------|
| 0.139848763 | SCN1B      |
| 0.139925933 | ORC5       |
| 0.139925933 | NA         |
| 0.139925933 | SLC35B2    |
| 0.140020278 | PARP11     |
| 0.140077253 | ANGEL1     |
| 0.14016983  | UBE2D3-AS1 |
| 0.140196032 | CCDC78     |
| 0.140382419 | MSANTD3    |
| 0.140382419 | CASP16P    |
| 0.140499773 | NIPA2      |
| 0.140731443 | CALML4     |
| 0.141119268 | GSKIP      |
| 0.141119268 | SLC12A9    |
| 0.141208927 | PHPT1      |
| 0.141356201 | VRTN       |
| 0.141356201 | MARCHF4    |
| 0.141356201 | MOSPD3     |
| 0.141358049 | CDHR3      |
| 0.141358049 | TIMM13     |
| 0.141400152 | NA         |
| 0.141400152 | PGPEP1     |
| 0.141556199 | HNRNPDL    |
| 0.141566335 | MDH2       |
| 0.141566335 | ZNF702P    |
| 0.141615891 | NA         |
| 0.141695782 | GAS2L3     |
| 0.141695782 | BYSL       |
| 0.141695782 | LMBRD2     |
| 0.141695782 | PIP4K2A    |
| 0.141695782 | RIPPLY1    |
| 0.141695782 | QTRT2      |
| 0.141695782 | CEP68      |
| 0.141695782 | PLCB2      |
| 0.141695782 | NA         |
| 0.141939442 | MRPL57     |
| 0.141939442 | EXOC6B     |
| 0.141939442 | SLC9A3R2   |
| 0.141939442 | DNAJC2     |
| 0.141939442 | DNAJC27    |
| 0.142062265 | PLAU       |
| 0.14219719  | ASXL3      |
| 0.142230039 | TRIP12     |
| 0.142738983 | NAT1       |
| 0.142922744 | NUDCD3     |
| 0.142974919 | NA         |
| 0.142974919 | PPP3CB-AS1 |

|             |           |
|-------------|-----------|
| 0.142974919 | TTC12     |
| 0.143064444 | FAM161A   |
| 0.143172166 | ANAPC4    |
| 0.143254645 | NA        |
| 0.143254645 | SUCO      |
| 0.143254645 | DCLK1     |
| 0.143334353 | GPR83     |
| 0.143388161 | NA        |
| 0.143415892 | NA        |
| 0.14342029  | CCDC130   |
| 0.143424984 | SLC35F6   |
| 0.143469522 | ATF5      |
| 0.143469522 | LINC02365 |
| 0.143469522 | MAN1B1    |
| 0.143469522 | ARHGAP22  |
| 0.143469522 | NA        |
| 0.143509194 | NA        |
| 0.143579856 | ZNF233    |
| 0.143579856 | RLIM      |
| 0.143579856 | HAGH      |
| 0.143625509 | AACSP1    |
| 0.14362803  | NPLOC4    |
| 0.143662754 | DIABLO    |
| 0.143665152 | NA        |
| 0.143740587 | ZNF611    |
| 0.143831745 | ZNF646    |
| 0.143862725 | POLR2J4   |
| 0.143862725 | FHL3      |
| 0.143862725 | OSBP      |
| 0.143862725 | NA        |
| 0.143862725 | LINC00888 |
| 0.143862725 | FYN       |
| 0.143862725 | H2AZ1     |
| 0.143862725 | RIOX2     |
| 0.143944346 | NA        |
| 0.143944346 | COMMD4    |
| 0.143944346 | C12orf4   |
| 0.144094841 | HES2      |
| 0.144147982 | SERTAD4   |
| 0.144175329 | KDM5C     |
| 0.144175329 | RHBDL1    |
| 0.144175329 | SLC4A7    |
| 0.144175329 | HLF       |
| 0.144175329 | STRIP2    |
| 0.144368029 | EBP       |
| 0.144368029 | DAZAP1    |
| 0.144520076 | FBXW9     |

|             |              |
|-------------|--------------|
| 0.144652814 | RBSN         |
| 0.144665389 | NA           |
| 0.144671352 | PDHB         |
| 0.14484596  | NA           |
| 0.144913326 | SCLT1        |
| 0.145017842 | RPL12P37     |
| 0.145017842 | ZC3H7B       |
| 0.145070035 | NUDT16       |
| 0.145070035 | HSD17B7      |
| 0.14518788  | YTHDF3       |
| 0.14518788  | SNORA11F     |
| 0.145303973 | RN7SL145P    |
| 0.145589522 | DIRAS1       |
| 0.145756882 | SLC15A4      |
| 0.145763177 | NA           |
| 0.146277335 | SIAH2        |
| 0.146369389 | NA           |
| 0.146401276 | GBF1         |
| 0.146536617 | NA           |
| 0.146536617 | NLRP4        |
| 0.146691288 | CAMLG        |
| 0.146706405 | PEG10        |
| 0.146912916 | NA           |
| 0.147030688 | METTTL26     |
| 0.147057678 | TNFRSF12A    |
| 0.147057678 | SPIN4        |
| 0.147057678 | NA           |
| 0.147057678 | POMT2        |
| 0.147057678 | CNDP2        |
| 0.147057678 | MYT1         |
| 0.147057678 | PARP8        |
| 0.147057678 | ASH2L        |
| 0.147057678 | RAC3         |
| 0.147213739 | ILRUN        |
| 0.147213739 | SLC25A5      |
| 0.147213739 | NA           |
| 0.147213739 | TCF7L2       |
| 0.14735721  | NA           |
| 0.147409132 | TCIRG1       |
| 0.147792057 | NA           |
| 0.148154638 | LOC101927164 |
| 0.148154638 | DIPK1B       |
| 0.148156954 | SGMS1        |
| 0.148281893 | ZDHHC9       |
| 0.148281893 | KAT14        |
| 0.148561041 | RBKS         |
| 0.148808879 | ZNF776       |

|             |              |
|-------------|--------------|
| 0.14883449  | C3orf62      |
| 0.148889442 | NA           |
| 0.148889442 | PINX1        |
| 0.148929784 | NA           |
| 0.149170469 | FUT5         |
| 0.149344887 | PCNX2        |
| 0.149344887 | NA           |
| 0.149344887 | ST6GAL1      |
| 0.149344887 | NAA60        |
| 0.149344887 | ATP5ME       |
| 0.149344887 | BTLA         |
| 0.149344887 | JADE1        |
| 0.149344887 | GZMM         |
| 0.149344887 | NA           |
| 0.149344887 | NA           |
| 0.149344887 | PSPN         |
| 0.149496784 | HIVEP2       |
| 0.149738418 | GAB2         |
| 0.149738418 | MRPL28       |
| 0.149738418 | PGAP2        |
| 0.149774458 | MRPL11       |
| 0.149800816 | DDRKG1       |
| 0.149804584 | SREBF2       |
| 0.149908007 | MCAM         |
| 0.14993735  | GCNT7        |
| 0.150095754 | ARL8A        |
| 0.150095754 | IVNS1ABP     |
| 0.150264209 | ZNF263       |
| 0.150636612 | GGT5         |
| 0.151263567 | NA           |
| 0.151534406 | PHF24        |
| 0.151534406 | RABGEF1      |
| 0.151534406 | NA           |
| 0.151767335 | USPL1        |
| 0.151767335 | METRNL       |
| 0.151767335 | LYAR         |
| 0.151897934 | NWD1         |
| 0.151930417 | RPE65        |
| 0.152242269 | KIAA1191     |
| 0.152374805 | C18orf21     |
| 0.152488879 | RN7SL737P    |
| 0.152488879 | LOC100422317 |
| 0.152488879 | SPPL2A       |
| 0.152488879 | MTFMT        |
| 0.152616941 | STOX2        |
| 0.152616941 | CLCN7        |
| 0.152616941 | CENPH        |

|             |                |
|-------------|----------------|
| 0.152652548 | RICTOR         |
| 0.152652548 | LINC01119      |
| 0.152652548 | RPS11P5        |
| 0.152652548 | RTEL1-TNFRSF6B |
| 0.152676064 | MTA1           |
| 0.15307073  | NUP155         |
| 0.153248201 | NA             |
| 0.153297172 | KRTAP4-7       |
| 0.153435121 | AGAP3          |
| 0.153435121 | SRP19          |
| 0.153435121 | UTP14C         |
| 0.153435121 | IPO11          |
| 0.153435121 | FUT6           |
| 0.153482885 | NA             |
| 0.153570665 | AP5Z1          |
| 0.153570665 | HNRNPA2B1      |
| 0.153570665 | AP3S2          |
| 0.153595531 | AMZ2P2         |
| 0.153595531 | RADIL          |
| 0.153708599 | ARHGDIB        |
| 0.153770772 | ESD            |
| 0.153785997 | FBXL15         |
| 0.153785997 | NA             |
| 0.15396619  | MYO5C          |
| 0.15396619  | GPATCH1        |
| 0.15396619  | TLR9           |
| 0.15396619  | ABCA2          |
| 0.15396619  | PITX1          |
| 0.154081947 | ECT2L          |
| 0.154081947 | NFKBIE         |
| 0.154081947 | NA             |
| 0.154185066 | MUC3A          |
| 0.154233219 | NA             |
| 0.154359274 | NA             |
| 0.154404656 | MACROD1        |
| 0.154453912 | NA             |
| 0.154537553 | TUBBP1         |
| 0.154674073 | GUSB           |
| 0.154674073 | DOLPP1         |
| 0.154851048 | LOC101928069   |
| 0.154853743 | NA             |
| 0.155025947 | RALGAPA1       |
| 0.155096179 | KIFAP3         |
| 0.155340291 | NXN            |
| 0.155492419 | YAF2           |
| 0.155659599 | RPSAP52        |
| 0.155659599 | SIN3A          |

|             |          |
|-------------|----------|
| 0.155755948 | TMEM62   |
| 0.155893547 | RSAD1    |
| 0.155935028 | VEGFB    |
| 0.155935028 | ZNF446   |
| 0.156049934 | CCT2     |
| 0.156049934 | KRI1     |
| 0.156053252 | DGCR6L   |
| 0.156414732 | EXOSC5   |
| 0.156599603 | GLUD1P3  |
| 0.156599603 | IMPA2    |
| 0.156692953 | MTCL1    |
| 0.156706734 | NA       |
| 0.156706734 | EGR2     |
| 0.156706734 | SH3GLB2  |
| 0.156706734 | ERCC6    |
| 0.156964582 | ZNF483   |
| 0.157107026 | CCDC142  |
| 0.157207853 | SOX30    |
| 0.157207853 | FEM1C    |
| 0.157207853 | VGLL3    |
| 0.157207853 | TRAF3IP2 |
| 0.157483771 | NA       |
| 0.157509786 | NA       |
| 0.15754086  | SIGLEC16 |
| 0.15756981  | COL6A6   |
| 0.15787287  | CPLX4    |
| 0.158132069 | PTMS     |
| 0.158480397 | PDCD5    |
| 0.158480397 | CUEDC2   |
| 0.158507152 | MTCH2    |
| 0.158557414 | MARCHF5  |
| 0.15864031  | IP6K1    |
| 0.15866688  | NA       |
| 0.158732441 | INTS12   |
| 0.158956044 | WDR43    |
| 0.159189225 | RAB22A   |
| 0.159363714 | TRMO     |
| 0.159535163 | FBLN1    |
| 0.159585979 | SEMA3F   |
| 0.159742568 | HDHD3    |
| 0.159742568 | SEC14L2  |
| 0.159742568 | ST7-AS1  |
| 0.15979184  | ACSM4    |
| 0.159940388 | NA       |
| 0.159940388 | COX19    |
| 0.16008192  | NA       |
| 0.160485533 | PTPRS    |

|             |              |
|-------------|--------------|
| 0.160755226 | SCNN1D       |
| 0.160755226 | NA           |
| 0.160755226 | NPDC1        |
| 0.160836696 | TRAPPC2      |
| 0.161019998 | ACCS         |
| 0.161198576 | NA           |
| 0.161198576 | NPM1         |
| 0.161371318 | NA           |
| 0.161371318 | SH3TC2-DT    |
| 0.161371318 | UBE4A        |
| 0.161371318 | RPSAP39      |
| 0.161371318 | MMP1         |
| 0.161371318 | RANBP10      |
| 0.161498358 | AIDAP2       |
| 0.161660521 | NUMB         |
| 0.161660521 | RPL13AP12    |
| 0.161660521 | ZNF451       |
| 0.161902321 | CHRNA5       |
| 0.161902321 | PPOX         |
| 0.161942326 | H2BC18       |
| 0.161966307 | TMEM64       |
| 0.162438482 | NA           |
| 0.162444061 | ARHGEF19     |
| 0.162481841 | BST1         |
| 0.162548193 | NA           |
| 0.162548193 | ZMYM3        |
| 0.162551873 | TEN1         |
| 0.162568012 | LRRIQ3       |
| 0.162569406 | ADAT2        |
| 0.162702267 | LOC155060    |
| 0.162857116 | PROX1        |
| 0.163043263 | FGFBP1       |
| 0.163043263 | PGAM1        |
| 0.163043263 | C19orf38     |
| 0.163187728 | LINC00867    |
| 0.163295473 | ANKRD63      |
| 0.163298122 | EPB41L5      |
| 0.163319858 | DVL3         |
| 0.163516751 | KNOP1        |
| 0.163565903 | RBBP6        |
| 0.163565903 | GS1-124K5.11 |
| 0.16372595  | ATXN10       |
| 0.163806554 | PTPRU        |
| 0.163946978 | NID2         |
| 0.164247493 | CASP7        |
| 0.164570372 | NA           |
| 0.164592482 | ACAP2        |

|             |           |
|-------------|-----------|
| 0.164598356 | KIAA0930  |
| 0.16461813  | NA        |
| 0.16461813  | NA        |
| 0.16461813  | DNAJC24   |
| 0.164618406 | GPR19     |
| 0.164618406 | NA        |
| 0.165088367 | DNAJC25   |
| 0.165088367 | CASP9     |
| 0.165094971 | C7orf31   |
| 0.165102214 | SLC25A24  |
| 0.165313182 | FRMD3     |
| 0.165321107 | DHRS4-AS1 |
| 0.165348198 | DHRS13    |
| 0.165707348 | LPIN1     |
| 0.165707348 | NA        |
| 0.165707348 | ZSCAN16   |
| 0.165823997 | NA        |
| 0.165950388 | SMIM24    |
| 0.166177135 | FAM185A   |
| 0.166177135 | NA        |
| 0.166177135 | GSTO2     |
| 0.166185475 | NA        |
| 0.166185475 | RAVER1    |
| 0.166185475 | KLF6      |
| 0.166310967 | WDR20     |
| 0.166310967 | NA        |
| 0.166318538 | ZNF493    |
| 0.166589656 | NA        |
| 0.166621703 | C12orf75  |
| 0.166621703 | TMCC2     |
| 0.166621703 | GBP2      |
| 0.166621703 | KIN       |
| 0.166833002 | NA        |
| 0.166833002 | GLB1L2    |
| 0.166837507 | SLC27A5   |
| 0.166837507 | NA        |
| 0.166922726 | ATXN1     |
| 0.166964985 | LETM1     |
| 0.167214695 | GPATCH8   |
| 0.167383694 | PCF11     |
| 0.167589869 | REEP4     |
| 0.167593301 | PKD1P5    |
| 0.167593301 | RN7SKP160 |
| 0.167660237 | CDC42SE1  |
| 0.167660237 | NA        |
| 0.167660237 | ZNF805    |
| 0.167660237 | SLBP      |



|             |             |
|-------------|-------------|
| 0.167810552 | NA          |
| 0.167810552 | SYS1        |
| 0.167810552 | HBA1        |
| 0.167810552 | NEIL2       |
| 0.167885517 | NFIX        |
| 0.167885517 | RUNDC3B     |
| 0.168057073 | RPL7AP60    |
| 0.168387426 | EMC1-AS1    |
| 0.168479986 | CACFD1      |
| 0.168479986 | SLC9A5      |
| 0.168479986 | PYY2        |
| 0.168665478 | DIMT1       |
| 0.16868357  | JADE2       |
| 0.16868357  | UBE2A       |
| 0.16868357  | SLC12A9-AS1 |
| 0.16868357  | MEN1        |
| 0.168829987 | RNU6-850P   |
| 0.168996368 | NA          |
| 0.169001625 | SPATA6L     |
| 0.169001625 | FAM76A      |
| 0.169001625 | TOR1AIP2    |
| 0.169067756 | NETO2       |
| 0.169091756 | KCTD12      |
| 0.169121965 | ZXDA        |
| 0.169138662 | MYRF        |
| 0.169138662 | NA          |
| 0.169138662 | ACTR5       |
| 0.169138662 | STK32A      |
| 0.169138662 | RELA        |
| 0.169242595 | CPT1A       |
| 0.169242595 | IST1        |
| 0.169242595 | NA          |
| 0.169242595 | NA          |
| 0.169328945 | ZNF254      |
| 0.169328945 | NT5M        |
| 0.169328945 | SWT1        |
| 0.169373859 | NA          |
| 0.169373859 | MST1R       |
| 0.169455601 | RPS2P53     |
| 0.169523324 | CHRNA6      |
| 0.169598563 | B3GNT6      |
| 0.169601321 | BHMT        |
| 0.169601321 | NA          |
| 0.169703088 | RPS6KL1     |
| 0.169703088 | NA          |
| 0.169703088 | CLDN1       |
| 0.169719849 | MTAP        |

|             |           |
|-------------|-----------|
| 0.169719849 | NA        |
| 0.16972919  | KCNJ14    |
| 0.169907527 | USP6      |
| 0.170006943 | ZNF131    |
| 0.170006943 | C11orf54  |
| 0.170225846 | TTC31     |
| 0.170281262 | DUSP19    |
| 0.170344348 | TMEM145   |
| 0.170548327 | NA        |
| 0.170548327 | BUB3      |
| 0.170548327 | ECHS1     |
| 0.170684904 | LINC01762 |
| 0.170723279 | BRPF3     |
| 0.170812471 | LRRIQ4    |
| 0.170899095 | FCHO1     |
| 0.170899095 | NA        |
| 0.170899095 | GPD1L     |
| 0.170899095 | KLF16     |
| 0.170934657 | NA        |
| 0.170934657 | SNRNP70   |
| 0.170934657 | B9D1      |
| 0.170934657 | UBB       |
| 0.171104451 | SFMBT1    |
| 0.171121218 | MAP3K2    |
| 0.171333535 | HEPACAM2  |
| 0.171424931 | EA2F      |
| 0.171476157 | CDKL3     |
| 0.171476157 | COX7A2L   |
| 0.171476157 | ELF1      |
| 0.171625322 | FAM83B    |
| 0.171625322 | NA        |
| 0.171719886 | SWI5      |
| 0.171719886 | SMCO2     |
| 0.171763844 | BRCA1     |
| 0.171763844 | NA        |
| 0.171763844 | ANKRA2    |
| 0.171763844 | DCBLD2    |
| 0.171763844 | CD37      |
| 0.171850349 | EPC2      |
| 0.171860556 | ZNF317    |
| 0.171903788 | H1-3      |
| 0.172162514 | BTNL9     |
| 0.172235015 | DCTN4     |
| 0.172307677 | SRPX      |
| 0.172307677 | RDM1P5    |
| 0.172380476 | SERPINC1  |
| 0.172386853 | TKFC      |

|             |           |
|-------------|-----------|
| 0.172506901 | NA        |
| 0.172680151 | ISOC2     |
| 0.172680151 | SLC6A20   |
| 0.172680151 | SNORD20   |
| 0.172680151 | DTD2      |
| 0.172734626 | DPF1      |
| 0.172755979 | YPEL4     |
| 0.173235433 | ALOX12    |
| 0.173235433 | ENGASE    |
| 0.173279247 | WASHC2A   |
| 0.173591936 | CKS1B     |
| 0.173597399 | PTGR1     |
| 0.173606503 | MAP11     |
| 0.173606503 | ALMS1     |
| 0.173606503 | TAGLN2    |
| 0.173606503 | KCNQ4     |
| 0.173994579 | ZBTB9     |
| 0.174086582 | NA        |
| 0.174267237 | MYBPC1    |
| 0.174297514 | NA        |
| 0.174297514 | MYC       |
| 0.174297514 | TAF3      |
| 0.174297514 | CLASP1    |
| 0.174297514 | NA        |
| 0.174297514 | SLC12A6   |
| 0.174297514 | MMP24     |
| 0.174514901 | ZNF454    |
| 0.174514901 | SETD2     |
| 0.174651411 | APOOL     |
| 0.174679078 | UQCC3     |
| 0.174679078 | FCSK      |
| 0.174713532 | HTATSF1   |
| 0.174713532 | STIL      |
| 0.175299817 | NA        |
| 0.175299817 | TRO       |
| 0.175415614 | NA        |
| 0.175591775 | ZBTB1     |
| 0.175591775 | DENND1B   |
| 0.175596514 | TRMT10C   |
| 0.175598995 | IL17RB    |
| 0.175672429 | FAM32A    |
| 0.175777192 | LOXL1-AS1 |
| 0.175782287 | PCDHGB6   |
| 0.175782848 | TPST1     |
| 0.17583976  | SP100     |
| 0.176152396 | ITSN2     |
| 0.17621825  | NA        |

|             |            |
|-------------|------------|
| 0.17621825  | PNPLA1     |
| 0.17621825  | C11orf68   |
| 0.17621825  | CLDN15     |
| 0.17621825  | SDC3       |
| 0.17621825  | NA         |
| 0.176305042 | CHCHD4     |
| 0.176329218 | OGN        |
| 0.176329218 | GAS5       |
| 0.176329218 | NFE2L1     |
| 0.176329218 | NLRP2      |
| 0.176329218 | ITPR3      |
| 0.176329218 | NA         |
| 0.176329218 | NRG2       |
| 0.176329218 | FDFT1      |
| 0.176329218 | NOC3L      |
| 0.176329218 | RNU6-1157P |
| 0.176478419 | TENT5A     |
| 0.176478419 | FAM171A2   |
| 0.176478419 | SFXN1      |
| 0.176478419 | CYP4F22    |
| 0.176478419 | IL1RAP     |
| 0.176478419 | LETM2      |
| 0.176712401 | PEX11B     |
| 0.176712401 | ETV4       |
| 0.176716899 | CCDC85C    |
| 0.176808368 | TDP1       |
| 0.177065879 | NA         |
| 0.177065879 | RNU1-91P   |
| 0.177088674 | ENTPD1     |
| 0.177088674 | NA         |
| 0.177153546 | POLR3B     |
| 0.177153546 | APPBP2     |
| 0.177164575 | RGP1       |
| 0.177164575 | PGBD2      |
| 0.177298437 | UBR1       |
| 0.177325288 | GJC1       |
| 0.177434494 | SNORA79B   |
| 0.177434494 | NR1I3      |
| 0.177523039 | LINC00622  |
| 0.177562477 | VRK3       |
| 0.177642161 | NA         |
| 0.177642161 | NA         |
| 0.177660733 | THRAP3     |
| 0.177660733 | RPS15AP36  |
| 0.177660733 | SPINK1     |
| 0.177660733 | NA         |
| 0.177660733 | PXK        |

|             |              |
|-------------|--------------|
| 0.177660733 | ZNF267       |
| 0.177660733 | GPR4         |
| 0.177874666 | L2HGDH       |
| 0.177874666 | KLHL20       |
| 0.177975493 | ANXA3        |
| 0.178010639 | SLC25A22     |
| 0.178106317 | DSTYK        |
| 0.178244417 | DAP3         |
| 0.178261599 | WDFY3-AS2    |
| 0.178261599 | ANKRD16      |
| 0.178261599 | TUBB8P1      |
| 0.17831779  | NA           |
| 0.17831779  | SPDYC        |
| 0.17831779  | MICOS13      |
| 0.178427581 | EMP3         |
| 0.178427581 | APOF         |
| 0.178427581 | CREB1        |
| 0.178427581 | VPS45        |
| 0.178427581 | MGARP        |
| 0.178427581 | NA           |
| 0.178427581 | GFUS         |
| 0.178427581 | RBBP5        |
| 0.17852428  | MARK3        |
| 0.178533995 | JPX          |
| 0.178696389 | DGKA         |
| 0.178707441 | ATP6V0D2     |
| 0.178707441 | ADGRB2       |
| 0.178707441 | TRMT44       |
| 0.178728107 | PTGR2        |
| 0.179098465 | SMAP2        |
| 0.179176567 | RNPEPL1      |
| 0.179176567 | LPCAT4       |
| 0.179296709 | MIER3        |
| 0.179361142 | ARRDC2       |
| 0.179439211 | NA           |
| 0.179556149 | LOC100996333 |
| 0.179556149 | RPA1         |
| 0.179843865 | TRIM25       |
| 0.180060493 | LSM2         |
| 0.180060493 | CLEC18B      |
| 0.180060493 | UBR2         |
| 0.180125592 | ZNF8-ERVK3-1 |
| 0.180148743 | NA           |
| 0.180395952 | SAR1A        |
| 0.18043461  | FAM98C       |
| 0.180482894 | UBE2H        |
| 0.180482894 | DCAF4        |

|             |            |
|-------------|------------|
| 0.180586637 | ABHD3      |
| 0.180586637 | ZNF324     |
| 0.180586637 | OR51B4     |
| 0.18089799  | TADA2B     |
| 0.180966285 | NA         |
| 0.181022944 | TNKS2      |
| 0.181022944 | LOC339666  |
| 0.181022944 | ZNF675     |
| 0.181022944 | ZNF350-AS1 |
| 0.181072157 | MIR3648-2  |
| 0.181144491 | NA         |
| 0.181144491 | NA         |
| 0.181147054 | NARS2      |
| 0.181187419 | SEC14L3    |
| 0.181268515 | NDUFAF3    |
| 0.181268515 | BRIX1      |
| 0.181445981 | ZNF581     |
| 0.181473545 | MAB21L4    |
| 0.181482874 | AKIRIN1    |
| 0.181482874 | C12orf66   |
| 0.181482874 | ATXN7      |
| 0.181482874 | AKR7A3     |
| 0.181482874 | PITX2      |
| 0.181482874 | NA         |
| 0.181482874 | LGR4-AS1   |
| 0.181549189 | PCDHGA11   |
| 0.181549189 | HECTD2     |
| 0.181549189 | CREBL2     |
| 0.181724907 | RAI14      |
| 0.181897272 | NA         |
| 0.181904354 | GABRD      |
| 0.181948427 | ANGPT2     |
| 0.182129958 | GLT8D1     |
| 0.182129958 | C1QL3      |
| 0.182292069 | HOXC8      |
| 0.182376596 | PDE3A      |
| 0.182987361 | ZNF799     |
| 0.183232989 | FBXO11     |
